# Supplementary material for: From cereus to anthrax and back again: Assessment of the temperature-dependent phenotypic switching in the “cross-over” strain Bacillus cereus G9241
Source: Front Microbiol. 2023 Mar 2;14:1113562. doi: 10.3389/fmicb.2023.1113562 (PMC10017872; doi:10.3389/fmicb.2023.1113562)
Supplement: Supplementary file 2 [file Data_Sheet_2.xlsx]

## Sheet: Info
	From cereus to anthrax and back again: Assessment of the temperature-dependent phenotypic switching in the "cross-over" strain Bacillus cereus G9241
	Shathviga Manoharan1, Thomas A. Brooker1, Carmen Sara Hernandez-Rodriguez2, Grace Taylor-Joyce1, Alexia Hapeshi1, Victoria Baldwin3, Les Baillie4, Petra C. F. Oyston3 and Nicholas R. Waterfield1.
	1Division of Biomedical Sciences, Warwick Medical School, University of Warwick, Gibbet Hill Road, Coventry, CV4 7AL, United Kingdom
	2Institut Universitari de Biotecnologia i Biomedicina, Departament de Genètica, Facultad de Ciències Biològiques, University of Valencia, 46100 Burjassot, Valencia, Spain
	3CBR Division, Dstl Porton Down, Salisbury, SP4 0JQ, United Kingdom
	4School of Pharmacy and Pharmaceutical Sciences, Cardiff University, CF10 3AT, Cardiff, United Kingdom
	 corresponding author (n.r.waterfield@warwick.ac.uk)
	Supplementary Dataset 1: Proteins at higher abundance at 25 °C compared to 37 °C in the secretome of B. cereus G9241 during exponential growth.
	Supplementary Dataset 2: Proteins at higher abundance at 25 °C compared to 37 °C in the secretome of B. cereus G9241 during stationary growth.
	Supplementary Dataset 3: Proteins at higher abundance at 25 °C compared to 37 °C in the cell proteome of B. cereus G9241 during exponential growth.

## Sheet: DataS1 G9241 Secretome Expo
Significant	_Log of P value	Log2-Fold Change	Protein IDs	Locus Tag (AQ16_)	Fasta headers	Peptides	Razor + unique peptides	Unique peptides	Sequence coverage [%]	Unique + razor sequence coverage [%]	Unique sequence coverage [%]	Mol. weight [kDa]	Q-value	Score	Intensity	MS/MS count	Intensity BcG25E1	Intensity BcG25E2	Intensity BcG25E3	Intensity BcG25S1	Intensity BcG25S2	Intensity BcG25S3	Intensity BcG37E1	Intensity BcG37E2	Intensity BcG37E3	Intensity BcG37S1	Intensity BcG37S2	Intensity BcG37S3	Peptide counts (unique)	Peptide counts (razor+unique)	Peptide counts (all)	LFQ intensity BcG25E1	LFQ intensity BcG25E2	LFQ intensity BcG25E3	LFQ intensity BcG25S1	LFQ intensity BcG25S2	LFQ intensity BcG25S3	LFQ intensity BcG37E1	LFQ intensity BcG37E2	LFQ intensity BcG37E3	LFQ intensity BcG37S1	LFQ intensity BcG37S2	LFQ intensity BcG37S3
		25 °C compared to 37 °C
+	5.35282	-4.96508	Q4MGH3	5824	Putative phage major capsid protein GN=AQ16_5824	27	27	27	87.2	87.2	87.2	33.066	0	323.31	17022000000	543	68263000	154330000	115240000	29293000	52567000	12871000	3005100000	5786600000	6048900000	1264000000	233100000	252150000	27	27	27	-0.703729	-1.01215	-0.669635	-0.140095	-0.585585	-0.164786	3.99856	4.17705	4.33412	3.19132	3.29745	2.4244
+	4.55146	-2.33954	Q4MVE0	3217	WxL domain surface cell wall-binding family protein GN=AQ16_3217	22	22	22	80.6	80.6	80.6	25.684	0	323.31	8382900000	370	209250000	439200000	276120000	53209000	61450000	19539000	1264400000	2687300000	2415700000	647330000	149520000	159930000	22	22	22	0.898646	0.600734	0.738675	0.0878828	-0.11805	-0.21153	2.95141	3.16049	3.14477	2.42517	2.61515	1.50196
+	4.0159	5.67164	Q4MX38	4932	Hemolysin BL-binding component GN=hblA	18	18	18	32.6	32.6	32.6	52.389	0	98.196	1006500000	87	153890000	603470000	228950000	0	1055900	0	0	7709000	11472000	0	0	0	18	18	18	0.401531	0.691509	0.456925	-4.90809	-5.64447	-5.89281	-4.62637	-5.81777	-5.02082	-7.40829	-4.12664	-3.86384
+	4.01513	3.20474	Q4ML36	1823	Phospholipase C GN=plc	21	21	21	67.5	67.5	67.5	32.397	0	323.31	8808000000	574	1124000000	1861300000	935450000	1247800000	1479700000	688250000	74015000	126880000	105450000	904970000	120200000	140030000	21	21	21	2.89962	2.30336	2.35984	4.05699	4.37522	3.98452	-0.708806	-0.542961	-0.799639	2.93957	3.59586	1.884
+	3.89524	-2.06765	Q4MVE1	3218	WxL domain surface cell wall-binding family protein GN=AQ16_3218	28	28	28	81.3	81.3	81.3	25.751	0	323.31	14058000000	596	495770000	1152500000	519260000	76279000	95490000	27493000	2311500000	3986600000	3852300000	953400000	234290000	352790000	28	28	28	1.91867	1.64511	1.44495	0.834099	0.662167	0.134086	3.69326	3.7146	3.8038	3.00524	3.11071	2.47738
+	3.75718	-2.33449	Q4MIR0	5855	Phage antirepressor KilAC domain protein GN=AQ16_5855	4	4	4	22.5	22.5	22.5	29.528	0	12.076	42099000	10	1597400	0	0	0	0	0	10004000	15023000	15474000	0	0	0	4	4	4	-6.1344	-6.26413	-6.6998	-7.62895	-6.29719	-6.11697	-3.99309	-4.0834	-4.01839	-6.85246	-3.02419	-3.37792
	3.66729	-1.21826	A0A0B5ZJV9	4801	Uncharacterized protein GN=AQ16_4801	22	22	22	58	58	58	41.016	0	273.86	2857600000	209	129060000	415410000	192680000	43241000	36688000	14862000	354250000	706240000	794880000	114680000	9327200	46306000	22	22	22	-0.0590776	0.0341066	-0.108304	-0.623307	-0.737517	-0.93129	1.07964	1.09717	1.3447	-0.152304	-0.25771	0.881286
	3.62944	0.937058	Q4MI20	2472	Ribose-phosphate pyrophosphokinase GN=prs	13	13	13	40.7	40.7	40.7	34.836	0	158.07	591950000	62	85755000	247800000	69434000	0	631890	0	30761000	74114000	71396000	12062000	0	0	13	13	13	-0.865544	-0.819727	-0.889186	-7.31222	-7.22973	-5.56302	-1.86676	-1.86778	-1.65108	-2.84034	-3.03961	-3.65757
+	3.60916	-4.53137	Q4MIT3	5836	Uncharacterized protein GN=AQ16_5836	25	25	25	19.3	19.3	19.3	208.51	0	75.077	282590000	42	423710	0	0	0	0	0	65911000	136210000	80040000	0	0	0	25	25	25	-6.11181	-6.68794	-5.73365	-5.93883	-6.18644	-5.64945	-1.50684	-1.31945	-2.113	-9.03018	-3.84009	-2.88708
+	3.50818	6.4613	Q4MX40	4931	Hemolytic enterotoxin family protein GN=AQ16_4931	22	22	22	60.6	60.6	60.6	38.214	0	323.31	1729400000	100	264470000	1143500000	304670000	0	387890	0	11934000	0	4445300	0	0	0	22	22	22	0.946202	1.57341	1.04164	-4.33086	-6.73988	-4.79889	-4.72372	-4.78704	-6.31191	-6.84637	-2.66264	-5.26253
+	3.44385	3.93764	A0A0B5Z981	660	Hemolytic enterotoxin family protein GN=AQ16_660	41	41	41	89.6	89.6	89.6	43.729	0	323.31	62314000000	2701	4570000000	14575000000	8053200000	10215000000	8570000000	3965200000	620550000	486400000	664020000	4734700000	615890000	5243400000	41	41	41	5.14787	5.37627	5.4401	7.3088	7.03466	6.73634	2.02117	0.861464	1.26869	5.25573	5.14037	7.0118
+	3.43291	3.98509	Q4MX39	4933	Hemolysin BL-binding component GN=hblA	38	38	38	69.9	69.9	69.9	41.75	0	323.31	19617000000	920	2476100000	9427900000	4497300000	454030000	526320000	153260000	258930000	232580000	345190000	663220000	79572000	502660000	38	38	38	4.06655	4.48697	4.24491	2.81733	2.78998	1.88342	0.826141	-0.332512	0.349537	2.43777	2.13617	3.50746
	3.30452	-1.11566	A0A0B5Z796	3540	Ribonuclease PH GN=rph	9	9	9	53.1	53.1	53.1	27.029	0	97.06	378710000	45	9919600	36582000	20991000	8834300	30957000	6186000	47072000	110260000	100860000	6727000	0	317370	9	9	9	-2.73282	-2.62878	-2.9835	-2.42097	-2.1611	-1.66134	-1.65031	-1.71361	-1.6342	-3.5975	-3.75208	-3.89878
+	3.28191	-2.30298	A0A0B5Z6H1	2448	Dihydropteroate synthase GN=folP	4	4	4	19.1	19.1	19.1	30.598	0	48.342	57175000	10	0	2298200	0	0	0	0	9297500	19375000	26205000	0	0	0	4	4	4	-5.72135	-5.74586	-6.34719	-6.48954	-6.31299	-5.07498	-3.57397	-3.82317	-3.50831	-5.52139	-3.69949	-4.58738
	3.18211	-1.09003	Q4MGD9	2373	Adenylate kinase GN=adk	17	17	17	69	69	69	23.743	0	103.83	1547700000	134	81545000	261410000	86151000	0	0	0	238830000	364620000	510700000	4403200	0	0	17	17	17	-0.765425	-0.762468	-0.547757	-6.11027	-5.57241	-6.15764	0.419716	0.236601	0.538121	-4.30315	-2.87782	-4.96704
+	3.16614	4.31199	Q4MXM4	4754	Extracellular ribonuclease GN=bsn	9	9	9	42.5	42.5	42.5	31.175	0	29.262	166990000	23	36509000	77170000	53040000	0	0	0	0	0	0	0	272910	0	9	9	9	-1.9285	-2.19175	-1.95743	-5.65671	-6.14611	-4.55286	-6.23316	-5.62373	-7.15676	-6.45526	-3.33921	-2.79243
+	3.14934	-3.65881	Q4MIT4	5835	Phage tail family protein GN=AQ16_5835	7	7	7	19.5	19.5	19.5	55.685	0	30.249	155950000	13	0	4571600	0	0	0	0	35924000	75728000	39727000	0	0	0	7	7	7	-5.96906	-5.2248	-6.303	-5.68637	-6.21774	-5.40151	-1.96486	-1.93774	-2.61784	-7.62513	-3.68294	-3.2693
	3.11209	-0.770717	Q4MT24	894	Aldose 1-epimerase family protein GN=AQ16_894	11	11	11	40	40	40	33.193	0	20.891	200480000	35	13433000	39852000	17233000	1911300	2645500	280330	27722000	45430000	51972000	0	0	0	11	11	11	-3.40172	-3.23936	-3.47452	-3.7133	-3.7455	-4.55023	-2.50877	-2.63645	-2.65823	-6.70429	-4.85598	-4.38109
+	3.07168	5.88998	Q4MGR8	658	Hemolytic enterotoxin family protein GN=AQ16_658	20	20	20	69.6	69.6	69.6	39.943	0	256.38	1342700000	89	241610000	794340000	269930000	805980	302650	419380	22466000	5900800	2909200	2319400	946800	756460	20	20	20	1.28322	0.874541	0.191918	-7.94913	-5.9537	-4.77619	-4.04229	-6.00542	-5.27255	-6.20464	-2.76442	-3.97914
+	3.04861	3.7766	Q4MGR7	659	Hemolytic enterotoxin family protein GN=AQ16_659	39	39	39	76.1	76.1	76.1	43.117	0	323.31	16762000000	618	2249800000	9759700000	3314600000	41029000	77618000	22557000	301350000	231940000	403230000	166000000	12120000	181570000	39	39	39	3.90784	4.45977	3.65327	-0.0149251	-0.00279372	0.501202	0.713328	-0.457766	0.435511	0.536587	0.286732	2.77654
+	3.01221	2.11938	Q4MQN2	729	Aspartate ammonia-lyase GN=aspA	6	4	4	18	13.8	13.8	52.528	0	8.0735	56838000	8	10224000	26866000	12632000	548750	0	179540	2246500	2446800	1694000	0	0	0	4	4	6	-3.82509	-4.0248	-3.23228	-6.53183	-7.52059	-6.44076	-5.91354	-5.8046	-5.72218	-6.77353	-4.64394	-4.65981
+	2.97556	-5.2704	Q4MGH5	5822	Phage family protein GN=AQ16_5822	9	9	9	61.9	61.9	61.9	16.593	0	170.45	578530000	36	0	0	3357500	0	1512600	0	53641000	379740000	137350000	0	2928300	0	9	9	9	-6.6958	-5.24542	-5.37337	-5.96646	-6.35048	-5.09433	-0.985909	0.321358	-0.838828	-5.81593	-2.83225	-4.29004
	2.93099	-1.10203	Q4MKC9	4226	Ribosome-recycling factor GN=frr	13	13	13	58.9	58.9	58.9	20.646	0	177.99	3694600000	147	276650000	543320000	264480000	37340000	48237000	13021000	390130000	1081200000	1034000000	6232300	0	0	13	13	13	0.873084	0.857359	0.473925	-0.693041	-0.742854	-1.72422	1.88853	1.82828	1.79364	-3.74604	-4.07832	-4.22472
+	2.92414	3.57068	Q4MX41	4930	Hemolytic enterotoxin family protein GN=AQ16_4930	63	63	63	86.6	86.6	86.6	49.264	0	323.31	29989000000	1807	2147300000	8678300000	4636700000	2048400000	1823900000	810020000	342070000	195060000	498690000	6181000000	894920000	1732300000	63	63	63	4.00442	4.54114	4.7095	5.2483	4.69989	4.66757	1.52389	0.214999	0.804139	5.6283	5.44156	4.95691
+	2.92328	1.54073	Q4MVU1	3361	Acetate kinase GN=ackA	25	25	25	88.7	88.7	88.7	43.216	0	241	2604800000	201	339370000	1171600000	484760000	0	489270	549030	104210000	202640000	281480000	18381000	0	1296300	25	25	25	0.989945	1.26395	0.916364	-6.53255	-6.78583	-6.05896	-0.542326	-0.717985	-0.191635	-2.84048	-3.36716	-5.44811
	2.91264	1.00497	Q4MNQ4	gcvPB	Probable glycine dehydrogenase (decarboxylating) subunit 2 GN=gcvPB	22	22	22	53.8	53.8	53.8	54.865	0	323.31	1364000000	231	35080000	90653000	56894000	169670000	191690000	73572000	34562000	52936000	61177000	323490000	60579000	213740000	22	22	22	-1.43335	-1.17643	-1.03561	0.824797	1.16946	0.928787	-2.23714	-2.14438	-2.2788	1.31199	2.05267	2.08546
	2.87908	-0.57008	Q4MWJ5	1622	Aldehyde dehydrogenase family protein GN=AQ16_1622	30	30	30	82.5	82.5	82.5	51.771	0	323.31	3656900000	299	240970000	678100000	349750000	91274000	81279000	27710000	368190000	796460000	857090000	91815000	10486000	63779000	30	30	30	0.646792	0.712385	0.77054	1.04324	0.210728	0.802915	1.1573	1.33161	1.35105	-0.482946	-2.20597	1.32439
+	2.8066	2.31577	Q4MWE4	1574	N-acetylmuramoyl-L-alanine amidase family protein GN=AQ16_1574	31	31	31	69.8	69.8	69.8	58.119	0	319.77	1568600000	153	193320000	762410000	361380000	8901000	14034000	4431400	70038000	69197000	79583000	5302100	0	0	31	31	31	0.375734	1.01633	0.786179	-1.58342	-2.60062	-1.72921	-1.17079	-1.9922	-1.60609	-4.98398	-4.26492	-4.36378
+	2.78805	-2.19365	Q4MTT7	318	Zinc-binding dehydrogenase family protein GN=AQ16_318	11	11	11	44.3	44.3	44.3	36.787	0	29.088	88028000	21	0	4799300	0	0	0	156910	15524000	10995000	17479000	39074000	0	0	11	11	11	-5.77375	-4.97569	-5.66807	-6.32742	-7.26769	-5.16059	-3.36607	-2.99436	-3.47614	-2.08597	-4.60018	-3.89967
+	2.78096	3.84036	A0A0B5ZG90	5317	Thermolysin metallopeptidase, catalytic domain protein GN=AQ16_5317	38	38	36	68.4	68.4	68.4	62.364	0	323.31	16961000000	735	1291500000	3556400000	1786000000	3837600000	4386400000	1701100000	143780000	103980000	90567000	47298000	1835300	14596000	36	38	38	3.10777	3.25737	2.88996	6.08622	6.2661	5.69322	0.171199	-1.53475	-0.902422	-0.653266	-3.17499	-1.62385
	2.77835	-1.206	Q4MH82	hpt	Hypoxanthine phosphoribosyltransferase GN=hpt	11	11	11	75.6	75.6	75.6	20.208	0	106.25	1470100000	90	96935000	284600000	107620000	842070	812850	527820	237450000	365900000	373030000	2374400	0	0	11	11	11	-0.987653	-0.495467	-0.6994	-5.62495	-6.10054	-4.18368	0.616546	0.44837	0.370563	-5.19153	-3.19574	-5.28682
+	2.7675	-1.44841	Q4MRY1	3644	Transcription elongation factor GreA GN=greA	5	5	5	62.7	62.7	62.7	17.437	0	57.988	363590000	30	18604000	59133000	17825000	0	1456000	0	49471000	106300000	109300000	1492300	0	0	5	5	5	-2.96327	-2.84769	-3.45331	-6.25989	-5.10447	-5.46672	-1.73252	-1.54183	-1.64468	-6.2507	-5.14662	-4.12477
+	2.70738	1.43676	Q4MGD2;Q4MPX5	2380	30S ribosomal protein S8 GN=rpsH	17	17	17	97.7	97.7	97.7	14.882	0	266.17	3766400000	152	419280000	1004100000	414060000	5453100	2476500	2424500	310300000	830200000	775690000	2396900	0	0	NaN	NaN	NaN	1.86443	1.72335	1.33028	-3.49194	-4.89402	-3.07977	0.0237344	0.428061	0.155991	-5.44824	-4.23078	-3.53021
+	2.68376	-1.53449	Q4MIR5	5849	Uncharacterized protein GN=AQ16_5849	8	8	8	46.5	46.5	46.5	22.429	0	155.52	874280000	91	45748000	88325000	76761000	540720	3191100	2043400	115490000	234230000	238410000	41757000	19328000	8458800	8	8	8	-1.61816	-1.99535	-2.18526	-4.77673	-3.81297	-3.07387	-0.647912	-0.373009	-0.174372	-1.38136	0.50375	-3.52288
	2.64877	-1.02453	Q4MP62	5229	Probable manganese-dependent inorganic pyrophosphatase GN=ppaC	24	24	24	87.4	87.4	87.4	33.707	0	323.31	1929200000	249	72537000	281360000	129220000	61404000	68496000	26921000	212300000	387820000	457570000	117420000	45675000	68531000	24	24	24	-0.933325	-0.868921	-0.745598	0.23721	-0.324987	0.523815	0.306057	-0.0978974	0.317583	-0.14303	1.10079	-0.404857
+	2.63423	1.78813	Q4MPU1	2259	UDP-N-acetylmuramoyl-tripeptide--D-alanyl-D-alanine ligase GN=murF	12	12	12	36.5	36.5	36.5	50.471	0	75.416	323670000	36	34174000	129290000	62072000	0	1269000	1294000	12247000	35791000	47525000	0	0	0	12	12	12	-1.99653	-1.34319	-1.90078	-5.27362	-5.20871	-2.65023	-3.84533	-3.45131	-3.30825	-7.92621	-3.09472	-4.11702
	2.58878	-0.263865	Q4MT96	4138	UDP-N-acetylmuramoylalanine--D-glutamate ligase GN=murD	20	20	20	61.1	61.1	61.1	48.8	0	90.197	611130000	63	48385000	124830000	61259000	0	391220	0	63393000	153670000	159200000	0	0	0	20	20	20	-1.38496	-1.50883	-1.44885	-6.35947	-5.74051	-6.51089	-1.20288	-1.19722	-1.15095	-7.26757	-2.99124	-4.22774
+	2.56552	-1.4374	Q4MX31	4939	L-asparaginase, type I family protein GN=AQ16_4939	8	8	8	29.6	29.6	29.6	37.199	0	123.41	146520000	25	8306500	13795000	1932000	0	0	0	25267000	39136000	58087000	0	0	0	8	8	8	-4.28954	-4.19046	-4.68553	-4.59276	-7.57583	-6.69874	-3.26041	-2.83659	-2.75634	-5.81901	-3.22658	-3.71631
+	2.56276	1.5416	Q4MLG5	2544	Ribosome-binding ATPase YchF GN=ychF	14	14	14	45.4	45.4	45.4	40.697	0	143.17	403970000	53	47181000	182630000	86397000	0	0	0	12701000	20279000	51135000	3643900	0	0	14	14	14	-1.59999	-1.30043	-1.05343	-5.68587	-5.6278	-4.89997	-2.76742	-3.19301	-2.61823	-4.50461	-3.19036	-3.86536
	2.53709	1.14882	Q4MQ21	2911	NADH dehydrogenase-like protein yjlD GN=yjlD	17	17	17	65.6	65.6	65.6	41.635	0	174.51	1245300000	166	128040000	408860000	179480000	24662000	44832000	16364000	55425000	74311000	88167000	84084000	37168000	103940000	17	17	17	-0.623563	-0.432576	-0.515491	-0.483678	-1.23779	-0.220427	-1.64959	-1.97472	-1.39377	-0.844171	1.11124	1.84926
+	2.51948	-1.48237	Q4MQF7	2073	Stress response protein SCP2 GN=yceC	4	4	4	21.7	21.7	21.7	21.925	0	25.194	60046000	29	2163500	2679500	3509800	4848100	6111100	3137700	2011900	9604000	9560200	11098000	1991200	3331500	4	4	4	-6.2431	-6.4942	-5.87974	-3.63034	-3.13183	-2.35809	-4.45042	-4.76711	-4.95241	-3.60866	-2.88	-4.79681
	2.46787	1.17016	Q4MS58	3570	Cell shape determining, MreB/Mrl family protein GN=AQ16_3570	14	14	14	49.6	49.6	49.6	36.046	0	97.701	269000000	41	37389000	108070000	54425000	0	0	0	13540000	18499000	34140000	2935800	0	0	14	14	14	-2.01984	-2.22509	-1.75298	-4.523	-7.28244	-5.94988	-3.0379	-3.42818	-3.04231	-3.78138	-3.90117	-3.71495
	2.46274	-0.689805	Q4MMT4	3955	Purine nucleoside phosphorylase GN=AQ16_3955	8	8	8	41.4	41.4	41.4	29.534	0	246.14	1868700000	289	61661000	171580000	75178000	129730000	131130000	62327000	129580000	187530000	235930000	399790000	121670000	162620000	8	8	8	-1.70876	-1.61998	-1.62064	-0.0420953	0.316885	-0.17643	-0.748194	-1.09602	-1.03575	1.07148	1.98443	1.75391
+	2.45817	-1.76546	Q4MP63	5228	Chitin binding protein CBP21 GN=cbp	11	11	11	33	33	33	24.042	0	158.8	2248400000	126	947120	0	832440	69864000	78991000	14118000	0	1967300	3353400	1379500000	480840000	218010000	11	11	11	-6.2644	-6.27175	-7.00889	0.38429	-0.361628	-0.487146	-4.92889	-4.8541	-4.46567	4.73093	2.54992	0.320113
	2.43402	0.787505	A0A0B5ZF28	2388	30S ribosomal protein S3 GN=rpsC	29	29	29	73.1	73.1	73.1	24.294	0	226.78	5400800000	211	793930000	1789200000	764690000	3110600	5551900	2181200	369380000	754200000	892520000	20048000	4914500	1006500	29	29	29	2.62336	2.27023	2.24284	-6.50806	-6.41704	-6.19606	1.58384	1.6666	1.52348	-3.94421	-4.21902	-6.44582
+	2.42786	2.42105	Q4MPU0	2258	DEAD-box ATP-dependent RNA helicase CshA GN=cshA	32	32	32	61.9	61.9	61.9	58.943	0	320.56	2438100000	213	317280000	923460000	512940000	465670	501570	1143000	149120000	352780000	177650000	2780000	0	0	32	32	32	1.0832	1.23557	1.97824	-5.98903	-5.10471	-5.25189	-1.24232	-0.414013	-1.30982	-5.22196	-3.69601	-4.56446
+	2.41961	-4.31905	Q4MIS9	5839	N-acetylmuramoyl-L-alanine amidase family protein GN=AQ16_5839	6	6	6	30.8	30.8	30.8	27.565	0	43.571	386340000	47	0	975210	0	1409700	2885400	1133700	69195000	144130000	139260000	18522000	2010900	6809600	6	6	6	-4.14891	-6.55462	-5.7745	-5.81912	-3.92186	-5.08024	-1.02611	-1.36916	-1.12563	-2.28105	-4.52458	-4.27318
+	2.41879	2.69613	Q4MPK7	1392	Beta-channel forming cytolysin family protein GN=AQ16_1392	12	12	12	67.7	67.7	67.7	37.1	0	209.84	1067700000	75	121720000	714520000	139500000	0	353950	217500	24028000	32784000	34550000	0	0	0	12	12	12	-0.100192	0.705914	-0.364751	-5.72059	-7.05955	-4.33409	-2.07926	-2.61418	-3.15397	-6.06137	-3.82638	-3.52837
+	2.40655	2.21355	Q4MW50	1487	Transglutaminase-like superfamily protein GN=AQ16_1487	38	36	36	67.4	66	66	64.551	0	323.31	2849200000	254	375000000	1202400000	622810000	125420000	108540000	29527000	151920000	117370000	105110000	1266300	1309000	8527500	36	36	38	1.12388	1.80812	1.5222	1.08724	0.857459	-0.0575378	-0.106727	-1.08674	-0.993004	-6.11186	-1.89863	-4.70261
	2.38752	-0.658287	Q4MLG6	2545	30S ribosomal protein S6 GN=rpsF	8	8	8	69.8	69.8	69.8	11.299	0	89.211	563860000	37	39342000	164960000	54695000	317770	1496700	396940	66110000	128050000	108490000	0	0	0	8	8	8	-1.81398	-1.72927	-1.68776	-6.33672	-4.35634	-5.54942	-0.875722	-1.18122	-1.19921	-6.87061	-4.45704	-4.46965
	2.38068	-0.763298	Q4MH86	cysK	Cysteine synthase GN=cysK	15	15	14	73	73	69.4	32.924	0	79.53	300720000	47	16792000	34359000	32835000	417170	946280	497560	40975000	81370000	92526000	0	0	0	14	15	15	-2.64157	-2.71771	-2.54759	-6.58431	-5.82071	-5.74916	-2.07017	-1.89094	-1.65587	-7.62281	-3.14968	-3.80771
	2.3583	-1.18645	A0A0B5ZDS6	tpx	Probable thiol peroxidase GN=tpx	12	12	12	93.4	93.4	93.4	17.936	0	157.44	1669600000	117	96110000	319250000	133250000	1064500	2566500	762460	211740000	533590000	367160000	4110300	0	0	12	12	12	-0.760585	-0.501116	-0.653898	-5.32975	-4.46724	-5.89413	0.314173	0.92432	0.405263	-4.86233	-3.95825	-2.6911
	2.33857	-0.564204	Q4MPR5	2221	GMP synthase [glutamine-hydrolyzing] GN=guaA	20	20	20	50.3	50.3	50.3	57.578	0	111.29	1028300000	133	66386000	182440000	101740000	16605000	23023000	6045700	103600000	291720000	193450000	43059000	268770	0	20	20	20	-1.12506	-1.34472	-1.18944	-1.48722	-1.65346	-1.24331	-0.591091	-0.572895	-0.802625	-1.89125	-3.67458	-4.98562
	2.33178	-1.25734	Q4MGE0	map	Methionine aminopeptidase GN=map	4	4	4	17.3	17.3	17.3	27.526	0	8.3376	47796000	14	3065000	4814700	4273100	1098800	1079900	0	10355000	6977800	16132000	0	0	0	4	4	4	-5.43435	-5.40457	-5.57943	-6.20594	-6.17844	-5.37458	-4.152	-4.61295	-3.88137	-8.01271	-3.80079	-4.27955
+	2.32177	-1.76166	Q4MPR8	2223	10 kDa chaperonin GN=groS	12	12	12	100	100	100	10.069	0	235.19	1819300000	144	52254000	125570000	54279000	25389000	13958000	2305800	308210000	712790000	280850000	118470000	17244000	107980000	12	12	12	-1.32328	-1.27599	-0.990875	-0.303409	-1.8814	-2.47091	0.392268	1.13576	0.166811	0.112131	0.370244	1.49156
	2.28263	-1.15264	Q4MH85	2453	33 kDa chaperonin GN=hslO	9	9	9	37.5	37.5	37.5	32.058	0	215.28	299130000	32	15447000	39438000	11288000	913920	445440	0	37876000	105660000	88056000	0	0	0	9	9	9	-2.59147	-2.77717	-3.28556	-5.84751	-7.09161	-6.83305	-1.69596	-1.73899	-1.76134	-7.21312	-3.38883	-4.06546
+	2.27132	2.11216	Q4MXK9	4769	Thiol-activated cytolysin family protein GN=AQ16_4769	43	43	43	79.5	79.5	79.5	56.702	0	323.31	7989400000	676	846770000	2364300000	1422800000	571270000	688640000	204740000	352080000	323060000	224080000	504930000	150370000	336310000	43	43	43	2.60252	2.62407	2.78215	3.27631	3.2996	2.4978	1.27659	0.412554	-0.0168806	2.06279	2.52229	2.66287
	2.25171	-0.807142	Q4MR51	2997	Cysteine desulfurase GN=sufS	10	10	10	30.5	30.5	30.5	45.269	0	120.58	633610000	81	29721000	96562000	52703000	36745000	24726000	11983000	71547000	104110000	126440000	65324000	0	13752000	10	10	10	-2.30506	-1.9516	-2.01794	-1.14613	-1.46842	-1.27591	-1.47212	-1.25909	-1.12197	-1.13063	-2.9675	-3.92158
	2.25024	-1.3999	Q4MJ95	3833	Uncharacterized protein GN=AQ16_3833	14	14	14	54.4	54.4	54.4	38.592	0	222.6	404580000	102	5130800	35545000	8800300	18785000	34397000	7515500	19914000	48043000	54501000	110870000	11786000	49298000	14	14	14	-4.27936	-3.88803	-4.27882	-1.14746	-1.42127	-0.443381	-2.6103	-3.18529	-2.45092	-0.800124	-0.536634	0.4273
	2.24264	1.22834	Q4MLS4	2611	FMN-dependent NADH-azoreductase GN=azoR4	9	9	9	40.4	40.4	40.4	22.796	0	31.243	591260000	53	118780000	190250000	124460000	2561400	0	0	39537000	53653000	62011000	0	0	0	9	9	9	-0.324706	-1.07562	-0.651491	-6.16066	-5.39061	-5.35816	-1.84495	-2.04833	-1.84355	-5.89714	-5.22373	-4.24592
+	2.22865	-1.89185	A0A0B5Z535	2222	60 kDa chaperonin GN=groL	68	68	68	94.1	94.1	94.1	57.459	0	323.31	69797000000	2177	2606700000	4857200000	5142900000	428130000	348290000	140250000	14083000000	23712000000	14297000000	1371400000	210410000	2599900000	68	68	68	4.12454	3.68623	4.47959	3.23633	2.73194	2.95824	6.21572	6.29851	5.45168	3.40178	3.81844	5.61458
	2.22695	-0.857055	A0A0B5ZDP4	aspA	Aspartate ammonia-lyase GN=aspA	22	22	5	52.4	52.4	13.2	52.306	0	146.43	1462500000	134	99264000	273500000	205200000	22273000	24850000	5055200	166640000	296700000	366270000	2696000	0	79712	5	22	22	-0.705719	-0.697359	-0.238597	-1.63752	-1.72699	-2.054	0.323794	0.227286	0.378411	-4.95638	-2.60424	-2.92945
+	2.20601	-2.8987	Q4MGH4	5823	Uncharacterized protein GN=AQ16_5823	8	8	8	40.3	40.3	40.3	23.991	0	28.567	77838000	20	0	0	1196600	0	0	0	36433000	28544000	10740000	924930	0	0	8	8	8	-5.74004	-6.5897	-5.842	-6.79256	-7.07439	-5.33505	-2.21125	-3.48994	-3.77446	-6.92165	-4.22117	-2.50584
+	2.19821	-1.68343	A0A0B5Z591	3713	Protein GrpE GN=grpE	10	10	10	60.6	60.6	60.6	21.614	0	92.008	1297800000	72	50392000	132450000	59423000	12630000	13679000	7121300	167160000	365830000	453740000	8647500	463290	26308000	10	10	10	-1.06079	-1.12962	-1.83882	-1.52816	-2.2317	-1.72149	0.0150027	0.291814	0.714244	-3.28902	-2.49023	-0.62835
	2.10407	-0.641753	A0A0B5Z5E9	3300	Putative tRNA binding domain protein GN=AQ16_3300	9	9	9	52.7	52.7	52.7	21.952	0	42.21	504350000	51	45442000	98279000	53753000	0	0	0	66519000	106780000	131410000	0	1094600	1069400	9	9	9	-1.82159	-2.21932	-1.96627	-5.52206	-4.98745	-5.99054	-1.2441	-1.40846	-1.42936	-6.08353	-3.24473	-4.75253
+	2.10384	1.73229	Q4MKA3	4251	Uncharacterized protein GN=AQ16_4251	3	3	3	31	31	31	13.566	0	17.979	79728000	13	9499700	26798000	22064000	10002000	7865700	0	2642400	857130	0	0	0	0	3	3	3	-3.36787	-3.39893	-2.86712	-2.73006	-3.61416	-5.06801	-4.60069	-4.67558	-5.55452	-6.46761	-4.72027	-4.38406
	2.10281	-0.558182	A0A0B5ZGG6	553	Cell envelope-related function transcriptional attenuator common domain protein GN=AQ16_553	14	14	14	38.7	38.7	38.7	37.44	0	34.701	554220000	60	49343000	124430000	51761000	0	0	0	53393000	162370000	112910000	0	0	0	14	14	14	-1.67867	-1.81784	-1.82303	-5.63237	-5.53539	-4.80731	-1.4143	-1.07047	-1.16023	-8.03274	-4.83815	-3.18728
	2.05665	-0.936549	A0A0B5YVF8	dnaN	DNA polymerase III subunit beta GN=dnaN	22	22	22	66.5	66.5	66.5	42.576	0	265.64	1467500000	109	62764000	258450000	133690000	0	0	0	239990000	354280000	418340000	0	0	0	22	22	22	-0.718823	-0.436436	-0.365327	-6.31296	-6.72975	-6.12437	0.72107	0.155388	0.412603	-7.50155	-4.37238	-2.71341
	2.03148	-1.02076	Q4MI66	549	Polysaccharide deacetylase family protein GN=AQ16_549	6	5	5	32.6	28.2	28.2	30.82	0	15.057	238970000	23	16494000	56081000	20974000	553160	4126700	0	6464400	79734000	54546000	0	0	0	5	5	6	-3.72541	-3.62173	-3.67764	-5.79102	-4.66068	-5.73754	-3.08003	-2.38902	-2.49346	-7.38999	-3.53936	-4.45469
	2.00686	0.919107	A0A0B5ZHL0	2398	30S ribosomal protein S7 GN=rpsG	16	16	16	69.9	69.9	69.9	17.884	0	277.01	9096000000	263	1233700000	2640500000	1571500000	453170	4643900	618440	687550000	1594800000	1360500000	1803100	0	0	16	16	16	3.04805	2.83071	3.01321	-6.41812	-3.72227	-5.79946	1.67887	2.294	2.16177	-7.27217	-3.10753	-4.36023
+	2.00507	4.41612	Q4MQT1	1941	Collagenase family protein GN=AQ16_1941	99	99	96	82.8	82.8	80	109.97	0	323.31	34866000000	2692	2657300000	6137500000	2405300000	6831500000	9402800000	3443200000	240910000	213430000	61044000	1243100000	226740000	2002900000	96	99	99	4.32138	4.13535	3.78414	6.70187	7.14178	6.65863	1.11085	-0.0115781	-2.10676	3.40902	3.36766	5.80775
	1.99274	1.21723	A0A0B5ZGC2	1209	SipW-cognate class signal peptide domain protein GN=AQ16_1209	18	18	18	62.9	62.9	62.9	21.675	0	323.31	2850000000	261	5744900	17450000	8006300	152930000	184080000	130340000	0	1514200	0	1846400000	307640000	195870000	18	18	18	-3.78223	-3.99292	-4.17172	0.775691	1.32295	1.17618	-5.66605	-4.86388	-5.06865	3.94521	4.19927	2.21005
+	1.95441	-4.3221	Q4MGA1	5832	Putative gp14-like protein GN=AQ16_5832	10	10	10	70.1	70.1	70.1	15.368	0	111.28	331760000	28	0	0	2171900	0	0	0	102740000	158090000	68762000	0	0	0	10	10	10	-6.55541	-6.13259	-4.2566	-6.43539	-6.2004	-5.88539	-0.170513	-1.34635	-2.46144	-6.3757	-3.48583	-2.5626
+	1.94851	1.47664	Q4MQK9	2025	Formate acetyltransferase GN=pflB	24	24	24	42.9	42.9	42.9	84.518	0	116.98	601880000	84	92478000	139610000	109910000	0	1089800	0	18683000	87197000	28256000	79806000	10422000	34428000	24	24	24	-0.893271	-1.59458	-1.18445	-4.77716	-4.34376	-4.71274	-2.666	-2.2648	-3.17143	-0.102613	-3.27667	0.244531
	1.94614	0.817035	A0A0B5Z1E5	2391	50S ribosomal protein L2 GN=rplB	21	21	21	65.6	65.6	65.6	30.253	0	323.31	7305800000	265	1060500000	2127000000	1214100000	53940000	85230000	19865000	667190000	940350000	1105500000	32060000	261330	0	21	21	21	2.83206	2.48709	2.74402	0.160449	0.428319	0.63891	1.97211	1.57164	2.06832	-3.05961	-2.54269	-2.67971
	1.94588	0.956772	A0A0B5Z6R3	2369	30S ribosomal protein S13 GN=rpsM	15	15	15	71.9	71.9	71.9	13.819	0	85.861	2871200000	96	409740000	1026300000	486160000	1865100	380240	1316600	226650000	455360000	262540000	714030	0	141530	15	15	15	1.58039	1.39185	1.50462	-5.47215	-6.18067	-4.69967	0.622779	0.844795	0.138975	-7.71443	-5.44988	-4.15013
	1.92922	-1.15058	Q4MWQ9	1680	Efflux transporter, RND family, MFP subunit GN=AQ16_1680	14	14	14	39.8	39.8	39.8	39.782	0	66.132	265800000	41	8837800	33381000	6998000	0	294990	204810	60062000	62106000	93911000	0	0	0	14	14	14	-3.44754	-2.99181	-2.997	-6.66744	-6.64405	-5.36279	-1.82034	-2.42073	-1.74352	-5.23358	-4.92238	-3.81305
	1.8866	-1.05736	Q4MPZ7	2308	Aldo/keto reductase family protein GN=AQ16_2308	8	8	7	38.3	38.3	33.9	31.842	0	145.2	305890000	48	21457000	38300000	18056000	19468000	31237000	3865200	51525000	53183000	65000000	3796200	0	0	7	8	8	-2.65373	-3.28338	-3.06927	-1.26231	-1.50864	-2.09429	-1.61821	-2.14998	-2.0661	-3.8246	-4.26367	-6.25999
	1.8821	-0.912927	Q4ML88	5100	Sulfatase family protein GN=AQ16_5100	25	25	25	51.6	51.6	51.6	74.697	0	323.31	2191300000	300	23364000	115450000	42199000	131730000	136370000	71299000	98856000	204730000	190300000	836120000	87168000	253750000	25	25	25	-1.89594	-1.6697	-1.25654	0.95692	0.769211	0.85796	-0.51999	-0.882845	-0.680562	2.4731	2.44666	2.28191
	1.87997	-1.09909	A0A0B5YRP4	565	Short chain dehydrogenase family protein GN=AQ16_565	16	16	16	85.4	85.4	85.4	25.164	0	118.26	524630000	57	34693000	77771000	24731000	0	270360	0	69387000	127000000	190650000	126630	0	0	16	16	16	-1.82018	-2.45619	-2.50104	-7.14202	-6.74466	-5.60838	-1.36501	-1.21358	-0.901542	-8.06429	-3.01234	-3.80857
	1.87378	0.669018	A0A0B5ZCK3	3443	Asparagine--tRNA ligase GN=asnS	25	25	25	64.8	64.8	64.8	52.925	0	108.49	1044100000	85	95205000	410920000	143840000	529560	687930	0	64519000	163990000	162930000	674560	806170	0	25	25	25	-0.467324	-0.302803	0.0211371	-5.47168	-5.69627	-5.13231	-0.804947	-1.03542	-0.915674	-6.36548	-2.9658	-3.93792
	1.86828	-0.480683	Q4MK66	1029	Purine nucleoside phosphorylase DeoD-type GN=deoD PE=1 SV=1	19	19	19	96.6	96.6	96.6	25.675	0	323.31	2904500000	244	152130000	443800000	196750000	165650000	92201000	62072000	203290000	553040000	463730000	398900000	55155000	117820000	19	19	19	-0.216546	-0.391196	-0.181329	1.66683	0.705955	1.60942	0.106462	0.404141	0.142375	1.12148	2.26483	2.14151
	1.86603	0.455042	Q4MIW8	2169	1-pyrroline-5-carboxylate dehydrogenase GN=pruA	40	40	40	68.3	68.3	68.3	56.21	0	323.31	4020500000	579	144510000	417980000	244320000	796970000	958700000	317110000	82599000	267290000	251680000	377360000	39839000	122090000	40	40	40	0.216443	0.361006	0.412689	3.02464	3.5112	2.45723	-0.279739	0.034737	-0.129985	1.45884	0.590055	2.44204
+	1.85694	-3.40956	Q4MGG8	5831	Putative major capsid protein gpP GN=AQ16_5831	11	11	11	81	81	81	16.144	0	46.266	404230000	28	1179700	3716400	3094700	0	0	0	52040000	215910000	125520000	2772200	0	0	11	11	11	-5.84456	-3.64074	-4.26494	-4.28864	-6.91023	-5.62996	-1.75089	-0.211093	-1.55957	-4.92481	-3.43871	-4.27846
+	1.85456	2.24989	A0A0B5ZBN7	1827	M6 family metalloprotease domain protein GN=AQ16_1827	43	43	38	55.6	55.6	53.1	88.007	0	323.31	3824100000	593	83207000	215890000	141330000	170600000	223760000	78632000	32222000	56192000	22702000	1938400000	321650000	539490000	38	43	43	-0.143646	-0.821932	-0.317046	1.52992	1.50133	1.29628	-2.58732	-1.86162	-3.58335	3.95214	4.18112	3.38204
	1.81731	-0.501101	A0A0B5YQY6	pdxS	Pyridoxal 5-phosphate synthase subunit PdxS GN=pdxS	19	19	19	80.7	80.7	80.7	31.789	0	323.31	5334300000	557	251190000	728270000	294080000	464120000	391640000	149550000	392650000	717570000	905210000	605960000	161130000	272920000	19	19	19	0.463911	0.415326	0.265826	2.42627	1.84882	1.51099	0.887453	0.693873	1.06704	1.73782	3.29926	2.21908
+	1.79613	1.55627	Q4MWG9	1597	LPXTG cell wall anchor domain protein GN=AQ16_1597	14	13	13	16.9	16.9	16.9	107.62	0	177.43	527650000	94	46978000	134750000	64947000	43831000	49299000	16229000	31336000	18422000	15635000	71364000	17231000	17627000	13	13	14	-1.64381	-1.88542	-1.86969	-0.361529	-0.674089	-0.989227	-2.77271	-3.22513	-4.06988	-0.923029	0.519385	-0.895228
	1.79364	0.706551	Q4MH33	2360	30S ribosomal protein S9 GN=rpsI	9	9	9	69.2	69.2	69.2	14.491	0	88.623	1703900000	55	282090000	597250000	247660000	0	0	0	81403000	257620000	237190000	0	680490	0	9	9	9	0.873021	0.342185	0.860702	-5.77515	-6.87634	-4.66922	-0.0441409	0.0315407	-0.0311449	-6.04988	-4.09546	-4.19642
	1.78356	-1.28078	Q4MQF8	2072	General stress protein 16U GN=yceD	6	6	6	39.2	39.2	39.2	21.058	0	188.43	487170000	62	27543000	41009000	27097000	27143000	27522000	4331000	89688000	91231000	92479000	34685000	7349200	17093000	6	6	6	-2.37023	-3.05257	-2.87514	-1.29546	-1.34229	-0.898188	-1.00301	-1.83418	-1.6184	-2.02119	-1.46135	-1.74403
	1.78028	-0.816299	Q4MRD7	3079	Glucose-6-phosphate isomerase GN=pgi	28	28	28	80	80	80	50.344	0	323.31	9663500000	463	382580000	1393800000	829750000	269720000	164900000	96440000	972270000	1995300000	2146900000	954280000	120140000	337470000	28	28	28	1.24233	1.54258	1.32216	1.38298	1.11765	1.34031	1.82771	2.28076	2.4475	2.50758	3.11069	3.75099
	1.77455	1.3513	Q4MQ14	2918	Viral enhancin family protein GN=AQ16_2918	41	41	41	35	35	35	167.29	0	209.75	942770000	165	150160000	268300000	114140000	58911000	99101000	24820000	29115000	118230000	75176000	4269100	359640	193830	41	41	41	-0.356125	-0.446637	-0.550668	0.528969	0.275967	0.300096	-2.00868	-1.14294	-2.25571	-4.74888	-2.87533	-2.26188
	1.75836	-1.05135	Q4MHW1	4535	VanW like family protein GN=AQ16_4535	8	8	8	34.3	34.3	34.3	32.323	0	53.043	295700000	33	18310000	40840000	18799000	5375100	0	0	65091000	78997000	66885000	883670	0	516420	8	8	8	-2.64399	-3.24416	-2.52935	-5.68324	-8.70562	-5.21501	-1.50922	-1.71973	-2.03452	-7.26395	-2.64415	-4.06295
	1.75668	-0.512477	Q4MGR3	2634	Phosphate acetyltransferase GN=pta	23	23	23	71.8	71.8	71.8	34.726	0	245.38	4007300000	336	178140000	596200000	270430000	171550000	180410000	42991000	323650000	649550000	725800000	635210000	81666000	151720000	23	23	23	0.389126	0.542799	0.56302	1.99069	1.04018	1.07308	1.06482	0.782496	1.18506	2.1513	1.75869	1.63067
	1.73641	0.937081	Q4MPS4	2228	tRNA N6-adenosine threonylcarbamoyltransferase GN=tsaD	3	3	3	13.6	13.6	13.6	36.003	0	18.778	33034000	5	7770200	17414000	7230000	0	0	0	619710	0	0	0	0	0	3	3	3	-4.04836	-4.41733	-4.31739	-5.44793	-5.79058	-6.41454	-5.28403	-4.7863	-5.52398	-5.93557	-3.89342	-4.39475
+	1.71702	1.93295	A0A0B5ZDM1	531	Transglutaminase-like superfamily protein GN=AQ16_531	38	38	36	81.1	81.1	79	43.705	0	323.31	6045000000	363	681000000	2755000000	1248300000	8406100	7518300	1633200	324740000	427370000	589740000	1367400	0	0	36	38	38	2.27525	2.86561	2.70024	-3.20617	-3.80986	-4.24145	1.16186	-0.275295	1.1557	-6.58624	-3.67828	-3.37222
+	1.71673	2.43517	A0A0B5Z7G8	3880	Probable butyrate kinase GN=buk	10	10	10	33.8	33.8	33.8	39.951	0	22.859	147680000	30	19944000	61513000	36539000	0	0	0	4864300	8710000	15690000	420930	0	0	10	10	10	-2.608	-2.65107	-2.43282	-4.78941	-5.7891	-5.9739	-5.46082	-5.79909	-3.73751	-5.26315	-4.25806	-5.49861
+	1.64957	-1.94742	Q4MQG2	2068	Toxic anion resistance family protein GN=AQ16_2068	4	4	4	14.4	14.4	14.4	41.672	0	9.9296	66031000	9	2272800	9680800	3308400	0	0	0	10678000	16600000	18810000	4681300	0	0	4	4	4	-6.26867	-6.94448	-5.12757	-7.66706	-6.2997	-5.13459	-4.27215	-4.24625	-3.98006	-4.63839	-3.50427	-4.84381
	1.64577	0.814027	Q4MKJ1	5259	Chitin binding domain protein GN=AQ16_5259	18	18	18	46.6	46.6	46.6	49.782	0	309.21	856830000	148	50652000	212090000	108570000	12560000	6993700	2134800	43919000	56661000	56292000	226620000	45863000	34481000	18	18	18	-1.53143	-0.892157	-0.957391	-1.67576	-2.68098	-2.85458	-1.88729	-2.13172	-1.80404	0.884878	0.244133	-0.861677
	1.63754	-0.698513	Q4MJ81	3848	Acetyl-CoA carboxylase, biotin carboxylase subunit GN=accC	12	12	12	36	36	36	49.797	0	48.034	416130000	55	42244000	71397000	28753000	0	0	0	59656000	106220000	107210000	646670	0	0	12	12	12	-2.03062	-2.04495	-2.44495	-4.58529	-5.94287	-5.99509	-1.70776	-1.49228	-1.22494	-6.60228	-4.46131	-3.52895
	1.62622	0.687727	A0A0B5Z0B9	1440	Glycerol kinase GN=glpK	11	11	11	29.4	29.4	29.4	55.073	0	180.56	492730000	51	47064000	204380000	103260000	0	635620	0	40003000	40500000	56479000	0	403120	0	11	11	11	-1.56042	-1.12525	-0.951997	-5.07407	-5.61621	-5.36944	-1.7911	-2.02515	-1.8846	-6.54269	-2.83697	-2.67517
	1.62308	-0.549318	Q4MSS3	980	GTP cyclohydrolase 1 GN=folE	7	7	7	31.2	31.2	31.2	21.02	0	27.015	303440000	35	23359000	44701000	25669000	12953000	13421000	3674300	30666000	70765000	64983000	13035000	0	214160	7	7	7	-2.70258	-2.97474	-2.95098	-2.0131	-2.22738	-2.47073	-2.11684	-2.30491	-2.55859	-3.46607	-3.06858	-3.56896
	1.62261	-0.346763	Q4MGX7	4154	Septum site-determining protein divIVA GN=divIVA	4	4	4	23.2	23.2	23.2	19.744	0	13.142	138740000	25	10403000	17204000	6187100	0	1315400	0	17436000	43569000	41911000	713380	0	0	4	4	4	-3.682	-3.80454	-3.6861	-6.12852	-7.81048	-3.49777	-3.32212	-3.55181	-3.25842	-8.13538	-4.38107	-4.31261
	1.62241	0.435701	A0A0B5Z977	2713	ATP synthase gamma chain GN=atpG	14	14	14	61.9	61.9	61.9	31.606	0	200.67	1128200000	139	60193000	157430000	78405000	81171000	67876000	36952000	23844000	89867000	77461000	217220000	40611000	197220000	14	14	14	-1.67922	-1.5496	-1.36812	0.426882	-0.395045	0.257129	-2.12206	-1.94615	-1.83584	0.432136	1.95692	2.59057
	1.61463	-0.696733	Q4MSG5	1148	7-cyano-7-deazaguanine synthase GN=queC	6	6	6	27.7	27.7	27.7	24.513	0	25.344	206520000	23	22885000	35611000	10155000	0	0	0	22467000	48238000	67164000	0	0	0	6	6	6	-3.21501	-3.38781	-3.85384	-5.73202	-6.22197	-5.22168	-2.82958	-2.8497	-2.68718	-6.83369	-3.03322	-3.81331
	1.59682	-0.586121	A0A0B5ZCW4	528	NH(3)-dependent NAD(+) synthetase GN=nadE	7	7	7	41.2	41.2	41.2	29.986	0	101.52	335600000	35	18825000	63716000	15238000	1288400	1098100	298370	34220000	81343000	100670000	18910000	0	0	7	7	7	-2.54565	-2.95369	-2.67507	-5.23572	-7.18005	-5.00528	-2.37397	-2.01997	-2.02211	-2.64839	-3.91249	-3.24588
	1.55701	0.610476	Q4MU99	827	Flagellin GN=AQ16_827	33	33	16	92.4	92.4	39.9	30.08	0	323.31	10622000000	937	367160000	863110000	459620000	536800000	1589700000	1084200000	313760000	400160000	518730000	3165500000	1136600000	186980000	16	33	33	1.49217	1.19071	1.36354	3.46788	4.45437	5.89317	0.907949	0.422686	0.884358	4.4376	5.19703	1.27021
+	1.55023	-2.35758	Q4MVD8	3215	WxL domain surface cell wall-binding family protein GN=AQ16_3215	65	65	65	72.9	72.9	72.9	96.029	0	323.31	4404400000	372	194100000	449820000	223540000	1869800	9226500	895390	1250000000	1621600000	618120000	31648000	3310700	262040	65	65	65	-0.0609807	-0.206638	-0.23952	-5.69838	-4.6207	-4.21394	3.4424	2.09474	1.02845	-3.49421	-4.48642	-6.47046
	1.54291	-1.16572	A0A0B5ZH14	repX	Plasmid replication protein repX GN=repX	10	10	10	32.4	32.4	32.4	48.734	0	25.501	248280000	34	4452300	38523000	17159000	0	0	0	27661000	60556000	99261000	0	664690	0	10	10	10	-3.78741	-3.14154	-3.11919	-7.43561	-7.42845	-5.88077	-2.31336	-2.57407	-1.66355	-6.54963	-4.5781	-3.70173
	1.53928	-1.1318	Q4MLH1	2550	50S ribosomal protein L9 GN=rplI	5	5	5	33.8	33.8	33.8	16.383	0	10.383	289520000	18	11101000	23766000	14139000	0	0	0	47832000	107680000	85008000	0	0	0	5	5	5	-2.5285	-2.80847	-3.42614	-6.61343	-5.67657	-5.44812	-2.1024	-1.38692	-1.8784	-7.47237	-3.29191	-3.5162
	1.53848	-0.909662	Q4MJF5	2132	Peroxiredoxin GN=ahpC	14	14	14	80.7	80.7	80.7	20.706	0	323.31	4897100000	402	261270000	741680000	285690000	106910000	127060000	55631000	457200000	1212500000	868210000	552720000	99865000	128330000	14	14	14	0.515426	0.528568	-0.125394	0.477014	0.250669	1.16779	0.977815	1.53689	1.13288	1.66246	2.67847	1.83221
	1.53832	-0.697059	Q4MLS7	2608	Pyridoxine kinase GN=pdxK	6	6	6	26.6	26.6	26.6	29.369	0	24.635	142210000	22	12923000	33299000	24621000	0	0	0	13524000	24968000	32879000	0	0	0	6	6	6	-4.04864	-3.49454	-3.67964	-4.16342	-5.47161	-3.96454	-3.13573	-3.21034	-2.78558	-5.79624	-2.59369	-3.42227
	1.53818	1.16967	Q4ML62	5075	3D domain protein GN=AQ16_5075	11	11	11	27.5	27.5	27.5	51.259	0	82.043	392660000	53	53779000	156530000	89726000	0	0	0	29670000	42950000	19999000	0	0	0	11	11	11	-1.35203	-1.54557	-1.4109	-6.49404	-6.47838	-4.89755	-2.15574	-2.37573	-3.28604	-7.88645	-3.70352	-5.04031
	1.53791	0.563398	Q4MLG8	2547	30S ribosomal protein S18 GN=rpsR	9	9	9	55.8	55.8	55.8	8.8134	0	24.34	1406700000	59	166350000	523330000	211910000	1045500	906900	0	44690000	233410000	221630000	3448300	0	0	9	9	9	0.289584	0.417546	0.0621829	-7.72749	-5.68232	-5.35642	-0.536846	-0.0753829	-0.308652	-5.40395	-3.38959	-3.93123
	1.53477	-0.87181	Q4MSB1	1200	Bacterial extracellular solute-binding family protein GN=AQ16_1200	9	9	9	29.8	29.8	29.8	39.883	0	22.889	191520000	35	12365000	35508000	16259000	0	1275600	0	35517000	27172000	62044000	1375000	0	0	9	9	9	-4.04985	-3.79002	-3.64413	-6.18532	-6.59593	-5.83694	-2.8443	-3.40506	-2.61922	-5.00672	-3.68754	-4.31122
	1.53215	0.864013	Q4MID3	murA	UDP-N-acetylglucosamine 1-carboxyvinyltransferase GN=murA	23	23	23	65.4	65.4	65.4	46.772	0	323.31	2643700000	188	284530000	1009600000	446810000	19981000	11858000	4391500	165460000	289090000	408240000	3721700	0	0	23	23	23	0.863521	1.32451	1.204	-1.38856	-2.61332	-3.01129	-0.0229235	0.123236	0.69968	-5.10255	-4.46822	-3.54629
	1.52632	-0.383425	Q4MSU5	959	4-hydroxy-tetrahydrodipicolinate reductase GN=dapB	7	7	7	37.6	37.6	37.6	29.247	0	21.532	157860000	35	12138000	24171000	13832000	0	0	153030	6523600	52236000	47987000	817620	0	0	7	7	7	-3.60425	-3.80048	-3.42506	-5.3012	-5.99804	-5.1749	-3.15288	-3.23126	-3.29537	-6.24707	-3.19414	-3.50876
	1.52311	0.687215	A0A0B5Z5S4	3051	FAD dependent oxidoreductase family protein GN=AQ16_3051	6	6	6	22.9	22.9	22.9	44.303	0	18.509	253450000	31	33144000	103640000	39488000	0	0	0	11274000	23399000	42499000	0	0	0	6	6	6	-2.22885	-2.24236	-2.22359	-4.94629	-8.98554	-6.20943	-2.90022	-3.28851	-2.56771	-7.62044	-3.76968	-4.49563
	1.52263	1.07764	Q4MGD5	2377	30S ribosomal protein S5 GN=rpsE	15	15	15	63.3	63.3	63.3	17.529	0	235.33	5120100000	167	662560000	1412900000	625000000	970660	1865200	692440	460190000	1036900000	904110000	14732000	0	164000	15	15	15	2.21983	1.80591	2.43094	-5.0788	-5.72462	-4.87308	0.826004	1.61488	0.782885	-3.65428	-3.71589	-3.63366
	1.51206	1.00749	Q4MNX0	cshB	DEAD-box ATP-dependent RNA helicase CshB GN=cshB	11	11	11	34.2	34.2	34.2	49.975	0	57.452	109830000	33	10628000	62033000	18058000	0	0	0	5204300	8253000	5652300	0	0	0	11	11	11	-3.64906	-3.31389	-3.1022	-5.04036	-5.87253	-5.94312	-3.88682	-4.40338	-4.79741	-6.89782	-3.71189	-3.66999
	1.50194	-1.30942	Q4MSR0	993	Uncharacterized protein GN=AQ16_993	20	20	20	50.8	50.8	50.8	42.164	0	170.43	738000000	73	34649000	85409000	48677000	176720	778330	476130	113680000	185340000	261370000	7123600	325240	0	20	20	20	-1.96625	-1.72546	-2.06524	-6.32293	-5.04794	-5.87882	-0.331427	-1.38068	-0.116571	-3.98419	-4.40245	-4.18111
	1.48781	-1.43349	A0A0B5YV53	ssb	Single-stranded DNA-binding protein GN=ssb	12	12	12	60.1	60.1	60.1	18.823	0	86.765	547230000	57	23687000	66442000	23483000	535320	1585900	415500	43523000	187560000	142890000	31822000	10328000	14961000	12	12	12	-2.73913	-2.79821	-3.22871	-6.08539	-3.69612	-5.30724	-2.31752	-1.17721	-0.970858	-1.83453	0.0806367	-0.395924
	1.48717	-1.28102	A0A0B5YR03	2557	Transcriptional regulatory protein yycF GN=yycF	5	5	5	29.9	29.9	29.9	26.81	0	10.463	31737000	5	325730	329410	279860	0	0	0	4517500	7553400	18731000	0	0	0	5	5	5	-5.8912	-6.33617	-5.00144	-6.33712	-7.27713	-4.14211	-4.44736	-4.59403	-4.34437	-7.8498	-3.17536	-4.37152
	1.48433	0.641061	Q4MLH3	2552	Adenylosuccinate synthetase GN=purA	30	30	30	71.6	71.6	71.6	47.467	0	323.31	3081400000	373	179840000	875690000	318550000	124790000	173940000	68658000	137490000	256510000	402100000	402040000	58080000	83723000	30	30	30	0.0914746	0.598989	0.589928	1.39342	1.25936	1.809	-0.175981	-0.419599	-0.0472104	1.26986	2.07615	1.54747
	1.47494	-0.719101	Q4MWE5	1575	Deblocking aminopeptidase GN=AQ16_1575	11	11	11	38.1	38.1	38.1	38.822	0	51.966	175020000	40	548310	4438200	2559800	13072000	13047000	8743200	2641900	3217100	12853000	111800000	2104500	0	11	11	11	-6.29027	-6.19416	-5.85683	-1.73578	-3.7857	-2.05645	-5.70617	-5.40832	-5.06947	0.0250008	-3.37907	-3.58994
	1.4683	0.813937	Q4MH95	lysS	Lysine--tRNA ligase GN=lysS	22	22	22	48.7	48.7	48.7	57.708	0	249.32	1883000000	140	222680000	561200000	361500000	7946600	11780000	4122100	177400000	357010000	177530000	1818400	0	0	22	22	22	0.590544	0.637038	0.795289	-2.02162	-2.5214	-1.51197	0.160284	0.0559391	-0.635164	-6.54666	-4.22251	-4.00558
	1.46129	-0.537592	A0A0B5YXC3	2384	50S ribosomal protein L14 GN=rplN	16	16	16	74.6	74.6	74.6	13.12	0	144.82	4475200000	199	405100000	1042800000	501710000	3216200	1951500	3596600	429040000	992920000	1094800000	0	0	0	16	16	16	1.21997	1.58675	1.37043	-4.68135	-5.70937	-4.20779	1.66296	2.06613	2.06084	-6.103	-3.62753	-4.47352
	1.44078	-0.533133	Q4MGE2	2632	D-alanyl-D-alanine carboxypeptidase dacA GN=dacA	7	7	7	19.6	19.6	19.6	47.053	0	51.67	249950000	46	6383300	31828000	24233000	15775000	15091000	6193900	23111000	47176000	64995000	15163000	0	0	7	7	7	-3.06596	-3.39481	-3.0932	-2.15843	-2.73398	-2.43575	-2.38191	-2.81691	-2.75576	-3.3523	-2.69121	-3.09349
	1.4329	0.708428	Q4MPZ9	2310	Bacterial extracellular solute-binding s, 5 Middle family protein GN=AQ16_2310	39	34	34	60.6	55.3	55.3	61.201	0	323.31	1759200000	365	0	3538300	18149000	252710000	384370000	170790000	8445200	8670300	4370300	615210000	152460000	140450000	34	34	39	-5.10532	-4.83816	-5.59209	2.24279	2.88611	2.75346	-5.98094	-5.9167	-5.76322	2.12929	1.9246	-0.541902
	1.43046	-0.530631	Q4MQ53	2881	Enolase GN=eno	40	40	40	85.6	85.6	85.6	46.404	0	323.31	35038000000	1293	2128100000	7090300000	3474700000	683110000	787100000	357080000	3943200000	6206900000	8014800000	1438900000	203020000	710270000	40	40	40	3.85086	4.1818	4.07493	3.2056	3.25431	3.36811	4.56352	4.32139	4.81457	3.36447	3.19471	4.17373
	1.42708	-0.691498	Q4MH27	2366	50S ribosomal protein L17 GN=rplQ	14	14	14	61.7	61.7	61.7	13.449	0	233.14	4537500000	115	336940000	983450000	481150000	2339900	4295500	4120200	453170000	1215000000	1056500000	602120	0	0	14	14	14	0.905545	1.64592	1.25566	-4.09353	-3.76234	-2.56228	1.85374	2.09627	1.93161	-7.01172	-3.43736	-4.65575
	1.42708	-0.889348	A0A0B5Z2W2	5234	Uncharacterized protein GN=AQ16_5234	10	10	10	42.4	42.4	42.4	31.177	0	53.988	162180000	30	14416000	45906000	20934000	160110	984360	0	31880000	18814000	23648000	5434900	0	0	10	10	10	-3.37531	-3.89475	-3.96306	-6.46867	-5.27992	-4.82457	-3.10819	-3.04605	-2.41084	-4.30805	-4.34241	-4.73052
	1.40596	0.517909	Q4MNQ5	gcvPA	Probable glycine dehydrogenase (decarboxylating) subunit 1 GN=gcvPA	18	18	18	44.7	44.7	44.7	49.449	0	181.66	1352700000	199	34400000	106230000	34416000	186790000	244460000	78350000	17490000	29425000	57474000	306060000	73797000	183770000	18	18	18	-1.78731	-2.06655	-1.598	1.79582	1.46273	1.63093	-2.20146	-2.5414	-2.26273	1.1958	1.97333	2.23664
	1.40351	-0.991114	Q4MTG9	4069	2,3,4,5-tetrahydropyridine-2,6-dicarboxylate N-acetyltransferase GN=dapD	16	16	16	55.8	55.8	55.8	25.704	0	323.31	2220700000	242	153690000	336970000	138920000	79496000	70859000	27362000	225240000	458460000	475730000	178990000	35868000	39122000	16	16	16	-0.33072	-0.736571	-1.32075	-0.193099	-0.409306	-0.380405	-0.125515	0.343482	0.367329	-0.0510204	1.81644	-0.41206
	1.39673	-0.560934	A0A0B5ZJT5	3514	Uncharacterized protein GN=AQ16_3514	13	13	13	81	81	81	25.751	0	235.32	1011900000	148	50513000	82299000	53686000	77453000	79809000	43741000	89650000	172670000	188250000	102300000	14583000	56986000	13	13	13	-1.214	-1.80966	-1.62363	0.213017	-0.0263048	0.647457	-1.11033	-0.893616	-0.960547	-0.518872	-0.403158	0.729262
	1.38484	0.742138	Q4MRX4	3651	Cys/Met metabolism PLP-dependent enzyme family protein GN=AQ16_3651	8	8	8	26	26	26	41.289	0	136.22	549390000	72	44936000	128170000	69671000	60982000	61917000	31488000	27575000	36974000	55449000	20432000	4083400	7716100	8	8	8	-1.67721	-1.62888	-1.07195	-0.339098	0.0404371	-1.04778	-2.23371	-2.45674	-1.914	-1.34421	-4.10339	-3.46857
	1.37612	-0.547065	Q4MIF4	2684	Fructose-1,6-bisphosphate aldolase, class II GN=fba	21	21	21	91.6	91.6	91.6	30.673	0	323.31	6469200000	259	546850000	1213300000	702870000	8691600	12726000	5164300	765750000	1487900000	1688000000	19691000	337690	17888000	21	21	21	2.05495	1.69569	1.58848	-2.90606	-3.68819	-3.0911	2.10767	2.349	2.52365	-4.12506	-3.82683	-2.4645
	1.37446	1.2508	Q4MP19	5768	Uncharacterized protein GN=AQ16_5768	10	10	10	56.2	56.2	56.2	15.832	0	76.574	683850000	152	0	0	0	13069000	20668000	3099300	0	0	0	419160000	103140000	124710000	10	10	10	-4.80699	-5.44144	-4.22705	-1.39552	-1.81151	-1.57558	-5.59622	-6.31686	-6.31481	1.89698	1.8062	0.9857
	1.36582	0.911799	Q4MSS7	976	Nucleoside diphosphate kinase GN=ndk	10	10	10	50.7	50.7	50.7	16.615	0	84.235	1995200000	206	50743000	75640000	79274000	285350000	364500000	88392000	23310000	45140000	36105000	695520000	97053000	154130000	10	10	10	-1.32088	-1.88863	-1.26007	2.60198	2.30272	1.70902	-2.69616	-1.92809	-2.58072	2.45491	2.34614	1.81149
+	1.36553	-1.62831	Q4MJY2	4351	3D domain protein GN=AQ16_4351	21	15	15	74.2	52.6	52.6	32.943	0	323.31	1424400000	119	103300000	281240000	64429000	3398900	1591900	302300	194010000	303340000	461930000	1784800	0	9061900	15	15	21	-0.841833	-0.900665	-1.86741	-4.00915	-5.4962	-5.261	0.586021	-0.416856	1.10587	-5.69435	-3.81551	-2.45834
	1.3599	-0.699539	Q4MS78	3550	Trigger factor GN=tig	42	42	42	82.8	82.8	82.8	47.214	0	323.31	12362000000	465	697970000	3084100000	1115900000	479180	0	772250	1307200000	2921700000	3233500000	0	0	0	42	42	42	2.27419	3.00615	2.65307	-3.60639	-6.88205	-4.84537	3.11592	3.4406	3.47551	-5.10343	-3.575	-4.31852
+	1.35626	2.08409	A0A0B5Z9B6	2887	Ribonuclease R GN=rnr	8	8	8	13	13	13	91.946	0	16.065	101820000	19	20394000	46250000	9905600	2105200	3838400	524900	3746900	13398000	0	1659200	0	0	8	8	8	-2.89862	-3.1665	-4.32266	-7.60501	-3.84568	-5.82247	-5.80041	-4.45741	-6.38224	-5.19633	-3.47562	-4.98848
	1.3296	0.933825	A0A0B5ZDL8	4197	Phosphate acyltransferase GN=plsX	4	4	4	17.3	17.3	17.3	35.416	0	15.799	143640000	13	6987700	22334000	13990000	9160700	10014000	13208000	3400400	8234000	17946000	32427000	3815400	2125800	4	4	4	-4.16581	-3.41905	-3.68237	-6.33905	-2.8878	-4.34143	-5.17452	-4.51241	-4.38176	-7.95314	-3.51048	-3.41092
+	1.32084	2.18893	Q4MVS3	3343	30S ribosomal protein S4 GN=rpsD	24	24	24	87.5	87.5	87.5	22.986	0	192.54	3789700000	139	681070000	1145800000	576290000	2267800	970200	1240600	289630000	479010000	595540000	16400000	1386800	125640	24	24	24	2.98459	2.47323	0.628324	-4.49571	-5.85731	-4.29709	-0.322941	-0.578796	0.421106	-3.85896	-4.22321	-4.12303
+	1.31851	-1.85011	Q4MND5	3165	Putative lipid kinase BmrU GN=AQ16_3165	6	6	6	21.3	21.3	21.3	32.817	0	10.334	84983000	15	4056300	5990000	7881600	0	0	0	10041000	29342000	27672000	0	0	0	6	6	6	-5.18894	-6.40782	-4.16979	-5.09209	-6.40916	-6.2845	-3.48292	-3.17956	-3.55374	-7.0426	-3.50523	-3.99176
	1.31753	0.72432	Q4MKB2	4242	30S ribosomal protein S15 GN=rpsO	5	5	5	57.3	57.3	57.3	10.56	0	85.246	1713000000	47	235430000	525640000	297590000	506460	0	0	86851000	244690000	322270000	0	0	0	5	5	5	0.803662	0.530254	0.703347	-6.87899	-5.88427	-5.53818	-0.524046	0.106259	0.28209	-8.1513	-3.25293	-3.75996
	1.31456	0.84675	Q4MM13	2829	Peptide chain release factor 2 GN=prfB	10	10	10	32.8	32.8	32.8	37.173	0	47.857	273590000	49	22422000	102120000	44872000	0	0	0	19461000	29282000	55432000	0	0	0	10	10	10	-2.30518	-1.99552	-1.61652	-5.82604	-6.84229	-5.26727	-2.87013	-3.18365	-2.40368	-7.45163	-2.95607	-4.64224
	1.30859	-0.829395	Q4MFX5	2700	Glucose-specific phosphotransferase enzyme IIA component GN=crr	14	14	14	83.6	83.6	83.6	17.475	0	323.31	2171800000	116	196350000	375550000	229050000	5354400	17826000	1919700	287960000	563010000	481610000	12831000	0	319950	14	14	14	0.518297	-0.463854	-0.0458199	-2.9601	-2.16247	-3.67445	0.731622	1.00059	0.764595	-3.5314	-3.40152	-4.43079
	1.29091	-0.288551	Q4MM56	1339	UPF0234 protein AQ16_1339 GN=AQ16_1339	9	9	9	49.7	49.7	49.7	18.459	0	34.027	376190000	52	32879000	82517000	26272000	0	696270	0	45988000	95793000	92047000	0	0	0	9	9	9	-1.80128	-2.13261	-2.01364	-6.45114	-6.06504	-5.57805	-1.77218	-1.6414	-1.66831	-6.36658	-3.8585	-4.19375
	1.29073	0.42589	Q4MIB5	2714	ATP synthase subunit beta GN=atpD	33	33	33	73.3	73.3	73.3	51.021	0	323.31	7266700000	957	339260000	1066800000	707540000	530680000	542070000	229800000	362290000	600190000	661480000	1219800000	379020000	627740000	33	33	33	1.33976	1.58386	1.41143	1.84025	2.42728	1.80473	0.863266	0.902585	1.29153	3.05172	3.81673	3.90204
	1.28279	0.55536	Q4MQP8	ald	Alanine dehydrogenase GN=ald	35	35	19	90.7	90.7	56	40.234	0	323.31	17028000000	1902	552000000	1489500000	763420000	1756100000	2130100000	793220000	419930000	693860000	1002100000	4592000000	868910000	1967200000	19	35	35	2.10816	2.12599	2.07248	4.4084	4.62734	4.18976	1.42135	1.2763	1.94291	5.04812	5.17885	5.55431
	1.278	0.533879	Q4MNQ9	3798	Uncharacterized protein GN=AQ16_3798	2	2	2	11.3	11.3	11.3	16.647	0	4.5136	64727000	12	5151900	13283000	8039700	6333300	7136500	3306100	6405200	10347000	565850	4158700	0	0	2	2	2	-4.70068	-4.95038	-4.51996	-2.5225	-3.11001	-2.68946	-5.44103	-5.37367	-4.95795	-5.03485	-3.89073	-5.3532
	1.27099	-0.873104	Q4MKD1	4224	Elongation factor Ts GN=tsf	29	29	29	74.6	74.6	74.6	32.449	0	323.31	11415000000	437	791240000	2343600000	1055600000	578700	2678200	0	1624600000	2394100000	3196900000	5031400	972930	0	29	29	29	2.75262	2.11341	1.98319	-6.05881	-5.83093	-5.20984	3.53838	3.14515	2.785	-5.81881	-4.42019	-3.99972
	1.25363	-1.33174	Q4MSJ6	dltA	D-alanine--poly(phosphoribitol) ligase subunit 1 GN=dltA	16	16	16	40.9	40.9	40.9	56.536	0	161.75	781230000	97	26237000	128940000	57651000	10102000	18982000	8943000	64783000	190690000	158320000	70580000	22781000	23216000	16	16	16	-3.00387	-2.14014	-3.61467	-3.16945	-2.85047	-1.52389	-2.08604	-1.23431	-1.44312	-1.44898	1.04184	-0.289604
	1.24975	1.11595	A0A0B5YYT7	1601	Uncharacterized protein GN=AQ16_1601	18	18	18	20.6	20.6	20.6	126.43	0	135.85	675820000	109	88516000	177030000	127170000	19255000	27632000	5234000	58511000	84766000	25589000	44855000	7400000	9864000	18	18	18	-0.908183	-1.22119	-0.949858	-1.4914	-1.99624	-1.62913	-1.56526	-1.93239	-2.92942	-1.86698	-0.0814955	-4.18317
	1.24936	1.4318	Q4MLU9	2589	Glycosyltransferase like 2 family protein GN=AQ16_2589	5	5	5	20.1	20.1	20.1	37.042	0	15.207	106780000	14	14479000	45847000	13324000	0	0	0	7463100	14503000	11158000	0	0	0	5	5	5	-3.41626	-3.16859	-3.12884	-5.49656	-4.93789	-5.93084	-5.67762	-4.45244	-3.87902	-8.24626	-3.52841	-4.28658
	1.22025	-1.24018	Q4MGD4	2378	50S ribosomal protein L18 GN=rplR	12	12	12	80	80	80	13.106	0	45.494	739130000	43	50501000	113330000	68830000	0	656540	269600	53837000	150460000	301250000	0	0	0	12	12	12	-1.54432	-2.20823	-1.54019	-5.39575	-4.94043	-5.29583	-1.13811	-0.720417	0.286312	-7.12969	-3.63074	-3.96139
	1.19301	0.82017	Q4MU97	829	Flagellin GN=AQ16_829	24	10	10	90.1	44.7	44.7	30.241	0	81.63	460240000	48	11729000	25039000	18544000	36414000	66979000	125640000	0	13189000	11749000	144220000	6738800	0	10	10	24	-4.08101	-4.4718	-4.61791	0.122553	-0.296121	2.78253	-4.85065	-5.01724	-5.76335	-1.16125	-0.498234	-4.44581
	1.17862	-0.534131	A0A0B5Z397	4245	Insulinase family protein GN=AQ16_4245	15	15	15	49.9	49.9	49.9	47.021	0	220.1	822580000	106	26899000	110300000	64643000	32421000	23022000	12782000	56732000	187510000	187900000	49122000	19876000	51361000	15	15	15	-2.2553	-1.79039	-2.01495	-0.804269	-1.65943	-1.34689	-1.71773	-1.57494	-1.16558	-1.06739	-0.557198	0.162983
	1.17547	0.497417	Q4MIM6	3882	2-oxoisovalerate dehydrogenase subunit alpha GN=bfmBAA	17	17	17	49.8	49.8	49.8	36.767	0	93.572	1238300000	192	66010000	191500000	117080000	168340000	137480000	54357000	66711000	63575000	116420000	161460000	28892000	66430000	17	17	17	-1.71661	-1.47668	-1.32414	0.307224	0.36672	-0.608805	-2.13483	-2.19554	-1.67931	-0.0930066	1.19467	1.3711
	1.17208	-0.744487	Q4MS48	3580	50S ribosomal protein L27 GN=rpmA	11	11	11	58.3	58.3	58.3	10.505	0	54.163	944210000	47	56943000	124430000	80891000	1811000	977620	0	140370000	270410000	267640000	736200	0	0	11	11	11	-1.27311	-0.70491	-0.973125	-3.07674	-7.11395	-4.63742	-0.527135	-0.448303	0.257755	-6.34847	-3.1429	-4.68762
	1.16539	0.611025	Q4MJ66	4186	Probable dual-specificity RNA methyltransferase RlmN GN=rlmN	9	9	9	22.9	22.9	22.9	41.538	0	24.331	190170000	30	20703000	76939000	19225000	0	0	0	9431800	18050000	45819000	0	0	0	9	9	9	-3.13917	-2.59502	-2.85656	-5.97037	-5.72412	-3.84108	-3.61868	-3.70708	-3.09807	-7.00716	-3.0597	-2.36278
	1.16172	0.945735	A0A0B5Z259	1439	Glycerol-3-phosphate dehydrogenase GN=AQ16_1439	16	16	16	37.5	37.5	37.5	62.42	0	84.562	454950000	59	56153000	167770000	73305000	199980	505170	0	21038000	105320000	29875000	785300	0	0	16	16	16	-1.36197	-1.66623	-1.06629	-4.76131	-6.71917	-5.32904	-2.01239	-1.92771	-2.9916	-7.84886	-2.52425	-4.03698
	1.15772	-0.743294	Q4MVP1	3314	Thermophilic metalloprotease family protein GN=AQ16_3314	19	19	19	50.9	50.9	50.9	41.807	0	211.26	1229000000	237	25725000	102280000	54671000	110190000	89111000	42457000	69106000	90845000	156850000	198640000	71527000	217570000	19	19	19	-1.78452	-1.41989	-1.18587	1.28654	0.545815	1.05492	-0.381478	-1.19999	-0.578942	1.02033	1.64091	1.05925
	1.15756	0.820191	Q4MU96	830	Flagellin GN=AQ16_830	28	19	19	93.2	69.4	69.4	32.704	0	323.31	2398400000	308	79426000	170320000	134130000	162000000	428290000	405420000	72049000	40343000	77069000	615900000	186150000	27290000	19	19	28	-0.925871	-0.881145	-0.545488	1.57802	2.56597	4.01206	-1.22114	-2.21987	-1.37207	2.35602	2.8165	-0.673029
	1.15249	-0.874141	Q4MI67	548	Cell-wall binding lipofamily protein GN=AQ16_548	6	6	6	34.4	34.4	34.4	25.02	0	17.692	65826000	17	6044800	11596000	6798000	0	0	0	3822900	19666000	17899000	0	0	0	6	6	6	-4.6286	-5.0723	-4.91408	-6.5447	-6.91346	-4.97767	-4.66009	-3.70929	-3.62317	-5.74805	-2.22061	-3.90166
	1.13929	-1.49631	Q4MQQ7	1918	Acetyltransferase domain protein GN=AQ16_1918	6	6	6	44.7	44.7	44.7	19.155	0	29.468	143590000	15	4295000	30692000	990050	1731900	0	531160	37469000	42664000	25215000	0	0	0	6	6	6	-4.67012	-4.00342	-4.9283	-4.32277	-4.48851	-4.56382	-2.03736	-3.12995	-3.94561	-7.5476	-4.12788	-4.47413
	1.13331	0.638912	Q4MWS4	1694	Cell envelope-related function transcriptional attenuator common domain protein GN=AQ16_1694	15	15	15	38.8	38.8	38.8	44.578	0	51.185	680030000	48	67502000	266580000	127740000	547890	512140	0	42447000	74370000	94645000	5342500	342430	0	15	15	15	-1.12419	-0.723359	-0.584627	-6.3107	-8.0615	-6.58868	-1.21378	-1.86865	-1.26649	-6.04342	-2.63222	-4.84389
	1.13014	-0.246981	Q4MTF7	lpdA	Dihydrolipoyl dehydrogenase GN=lpdA	40	40	40	71.7	71.7	71.7	49.439	0	323.31	28513000000	1387	1684700000	5143000000	2441400000	1030200000	1345200000	518460000	2705800000	4069700000	4749900000	2195700000	693600000	1935300000	40	40	40	3.71514	3.90956	3.88903	4.33597	4.24078	4.34904	4.05836	3.95761	4.2387	4.32832	5.07949	5.47267
	1.12203	-0.379029	A0A0B5Z4K7	2879	Triosephosphate isomerase GN=tpiA	23	23	23	94.4	94.4	94.4	26.468	0	323.31	7092600000	454	612600000	1416200000	659460000	217240000	221350000	59763000	846050000	1368700000	1543700000	67166000	24723000	55646000	23	23	23	2.18545	1.69592	1.88635	1.84817	1.56024	1.42235	2.22488	2.23796	2.44197	-0.56139	0.0571473	-0.0757873
	1.10647	-1.22654	Q4MVZ0	3411	Malate dehydrogenase GN=mdh	10	10	10	48.4	48.4	48.4	33.497	0	44.731	748080000	46	9812000	172660000	128220000	14239000	15097000	21240000	24675000	88734000	101490000	68174000	8035800	95708000	10	10	10	-3.77146	-2.84374	-3.51906	-0.61009	-1.07246	-2.36332	-3.006	-1.918	-1.53063	-1.92928	-4.18774	2.41043
	1.10169	-1.03942	Q4MQF9	2071	TerD domain protein GN=AQ16_2071	7	7	7	47.4	47.4	47.4	20.789	0	37.273	343000000	78	10416000	16710000	4574800	22471000	26465000	7251100	13838000	29839000	23339000	86905000	35431000	65764000	7	7	7	-3.70409	-3.88198	-5.01027	-1.22968	-1.30857	-1.58637	-3.43966	-2.84678	-3.19164	-0.454194	-0.598286	-0.595815
	1.1	-0.645691	Q4MIY9	2148	Thermophilic metalloprotease family protein GN=AQ16_2148	11	11	11	29.8	29.8	29.8	45.32	0	113.13	240950000	47	2708400	16539000	7278900	19888000	37957000	1023700	11137000	15554000	30607000	66556000	12630000	19072000	11	11	11	-4.31157	-3.79343	-3.76791	-1.72319	-0.863826	-4.3854	-2.90448	-3.61522	-3.41615	-1.06397	0.0135912	-1.09602
	1.09228	-0.666387	Q4MQ42	2891	Periplasmic binding family protein GN=AQ16_2891	9	9	9	31.7	31.7	31.7	36.519	0	18.544	85264000	24	4026600	10265000	5923100	3427900	3840600	6122100	8122200	10986000	26886000	4561700	1103400	0	9	9	9	-4.69668	-5.00845	-4.79394	-3.52203	-4.05828	-1.62638	-4.12993	-4.65444	-3.71553	-5.10272	-3.56054	-1.46019
	1.08211	-0.579084	Q4MJF6	2133	Alkyl hydroperoxide reductase subunit F GN=ahpF	22	22	22	52.4	52.4	52.4	54.825	0	229.56	1964000000	166	141930000	360610000	302030000	26872000	29820000	10270000	170050000	549930000	329930000	31585000	1590300	9410700	22	22	22	-0.2607	-0.681696	-0.0224725	0.00181706	-0.629952	-0.440747	0.00718334	0.559983	0.205218	-1.94679	-2.95988	-0.948568
	1.07002	-0.402455	Q4MHW9	2187	Adenylosuccinate lyase GN=purB	20	20	20	48.5	48.5	48.5	49.988	0	127.27	656710000	105	35552000	118540000	87925000	28976000	29194000	13810000	79457000	112750000	125400000	25101000	0	0	20	20	20	-1.81655	-1.60362	-1.58221	-0.88598	-1.21896	-0.764223	-0.991563	-1.54627	-1.25719	-2.38275	-3.41462	-5.38625
	1.06867	1.71797	A0A0B5ZH61	3360	Methyltransferase small domain protein GN=AQ16_3360	6	6	6	24.4	24.4	24.4	36.861	0	13.047	96796000	17	16892000	36993000	20437000	0	0	0	11859000	8294200	2321100	0	0	0	6	6	6	-2.98415	-3.3353	-3.04121	-6.11453	-5.4628	-4.75936	-3.51181	-6.09944	-4.90331	-5.02765	-5.13371	-3.86373
	1.06385	-0.589165	Q4MIB2	2711	ATP synthase subunit delta GN=atpH	8	8	8	46.7	46.7	46.7	20.481	0	26.119	250770000	71	14837000	35575000	18208000	15053000	19211000	9375900	20552000	26287000	45776000	32277000	1191700	12426000	8	8	8	-3.73854	-2.94373	-3.19414	-1.66667	-2.17317	-1.3798	-2.83562	-2.47889	-2.79439	-2.0568	-3.21381	-4.20596
	1.06219	-0.291086	Q4MR49	2995	FeS assembly ATPase SufC GN=sufC	17	17	17	64	64	64	29.031	0	323.31	1577400000	154	163330000	412880000	128100000	3175200	0	2112000	172110000	300640000	394020000	0	0	1048200	17	17	17	-0.164083	-0.475207	-0.271543	-4.51616	-6.6134	-7.15888	-0.0286005	-0.161309	0.152334	-8.23161	-3.35864	-3.84036
+	1.06035	2.49855	Q4MSX5	931	THUMP domain protein GN=AQ16_931	16	16	16	52	52	52	43.107	0	171.51	402060000	46	45231000	196620000	83899000	0	0	0	15276000	9344500	51681000	0	0	0	16	16	16	-1.45985	-1.00351	-1.2486	-7.04036	-6.59876	-5.34508	-3.00658	-5.89701	-2.30402	-7.56531	-2.73938	-3.30722
	1.0589	0.413668	Q4MIB3	2712	ATP synthase subunit alpha GN=atpA	27	27	27	50.4	50.4	50.4	54.643	0	237.45	3578000000	345	206980000	528360000	330230000	246780000	273390000	95334000	147670000	318540000	288330000	737780000	72737000	331870000	27	27	27	0.528537	0.527541	0.953199	2.13184	1.85667	1.64675	0.473442	0.22101	0.0738227	2.5145	2.19463	2.76016
	1.05609	0.301864	A0A0B5Z842	2385	30S ribosomal protein S17 GN=rpsQ	8	8	8	58.6	58.6	58.6	10.189	0	19.222	772420000	38	107100000	274400000	112700000	0	0	0	34527000	142250000	100340000	661090	366560	70544	8	8	8	-0.776191	-0.718511	-0.50921	-5.97616	-6.59771	-4.26074	-1.13947	-0.771886	-0.99815	-7.30068	-4.73686	-3.2496
	1.05596	-0.395883	Q4MKC0	4234	Transcription termination/antitermination protein NusA GN=nusA	24	24	24	77.2	77.2	77.2	41.149	0	174.18	1540000000	144	105580000	391710000	134810000	1100200	988920	824710	184750000	303700000	415240000	253310	420930	652660	24	24	24	-0.460667	-0.114537	-0.121254	-6.14297	-5.47143	-4.59465	0.221766	-0.0919953	0.361423	-5.81622	-4.54026	-4.98263
	1.0463	-0.447691	Q4MVA9	3186	Uncharacterized protein GN=AQ16_3186	7	7	7	25.9	25.9	25.9	29.688	0	18.708	111640000	13	11015000	23711000	9892100	593610	197350	571940	15704000	16186000	33772000	0	0	0	7	7	7	-3.72258	-4.16189	-3.6987	-6.47251	-7.0547	-5.58532	-3.15288	-3.59164	-3.49558	-6.0293	-5.08969	-3.92145
	1.04479	-0.991078	Q4MPU2	ddl	D-alanine--D-alanine ligase GN=ddl	12	12	12	33.5	33.5	33.5	40.107	0	61.867	702060000	56	39968000	146850000	66651000	0	0	580990	80092000	141940000	221400000	1211500	1786700	1582400	12	12	12	-2.09516	-1.58712	-1.51797	-4.81818	-5.50501	-4.45371	-0.45678	-1.54482	-0.225417	-4.95587	-3.42194	-3.83459
+	1.0408	1.99619	Q4MPG2	1349	Ornithine aminotransferase GN=rocD	20	20	20	69.9	69.9	69.9	43.228	0	248.52	804950000	194	15909000	46041000	25251000	275280000	215260000	117220000	2921400	12136000	30537000	57601000	6801700	0	20	20	20	-2.52101	-2.44762	-2.2536	1.96608	1.42087	2.24926	-5.98089	-4.35642	-2.87349	-1.02945	-2.77068	-4.10147
	1.03921	-0.570305	Q4MQW9	1976	Probable transcriptional regulatory protein AQ16_1976 GN=AQ16_1976	5	5	5	39.3	39.3	39.3	26.347	0	38.777	403380000	33	44410000	63246000	31638000	0	0	0	48201000	96641000	115850000	3394100	0	0	5	5	5	-1.77375	-2.59976	-2.00196	-5.58221	-5.78218	-5.61852	-1.65893	-1.59893	-1.40669	-5.85913	-2.09355	-3.91484
	1.02928	-0.502922	A0A0B5Z838	2681	Glutamate-1-semialdehyde 2,1-aminomutase GN=hemL	11	11	11	35.2	35.2	35.2	46.276	0	69.651	609750000	68	39952000	130800000	96003000	5650100	12887000	1897600	75609000	96121000	150830000	0	0	0	11	11	11	-1.81619	-1.82457	-1.37037	-3.05592	-2.60126	-3.08448	-1.43792	-1.22073	-0.843721	-6.52225	-3.2412	-2.7343
	1.02611	0.274519	Q4MNP5	4391	N-acetylmuramoyl-L-alanine amidase family protein GN=AQ16_4391	34	34	31	57.9	57.9	54.8	64.058	0	213.26	2150200000	176	212000000	604760000	287090000	8131400	11077000	2555600	260210000	398740000	348260000	17392000	0	0	31	34	34	0.935146	0.733155	0.604042	-2.30363	-2.93346	-3.48639	0.593432	0.529289	0.326065	-2.32845	-3.44793	-2.64035
	1.02385	-0.679958	A0A0B5ZA34	2454	Type III pantothenate kinase GN=coaX	4	4	4	21.8	21.8	21.8	29.093	0	38.77	177280000	25	16576000	32717000	4998900	0	0	108930	24835000	47472000	50570000	0	0	0	4	4	4	-3.27648	-3.70331	-3.02556	-6.81781	-5.46768	-4.8022	-3.12946	-2.49216	-2.34386	-8.34916	-3.60957	-4.26245
	1.00992	-0.55838	Q4MQ57	2878	Phosphoglycerate kinase GN=pgk	36	36	36	91.4	91.4	91.4	42.311	0	323.31	12252000000	644	714380000	2514500000	950270000	267000000	203170000	81972000	1051900000	2217300000	3465400000	442930000	82926000	260170000	36	36	36	2.28102	2.57559	2.33626	1.70295	1.49728	1.30416	2.69646	2.72954	3.44201	1.58567	2.1743	2.83502
	1.00751	-0.428366	A0A0B5ZIA2	4222	GTP-sensing transcriptional pleiotropic repressor CodY GN=codY	16	16	16	63.3	63.3	63.3	28.793	0	323.31	3453100000	132	284470000	671510000	391920000	3825400	0	638650	417860000	789040000	886180000	7652800	0	0	16	16	16	1.40559	0.957946	0.93449	-4.91047	-5.84062	-5.42916	1.30944	1.522	1.75168	-3.51678	-3.3189	-3.58351
	1.002	1.66449	A0A0B5Z5X5	3430	50S ribosomal protein L35 GN=rpmI	4	4	4	50	50	50	7.4958	0	55.964	185090000	24	26260000	71027000	28407000	0	0	0	4401700	12476000	42514000	0	0	0	4	4	4	-2.38732	-2.33418	-2.62381	-6.71971	-5.40846	-5.22611	-5.49558	-4.02513	-2.81806	-6.82271	-3.37888	-3.5349
	1.00066	-0.742974	A0A0B5Z3L3	2386	50S ribosomal protein L29 GN=rpmC	7	7	7	63.6	63.6	63.6	7.768	0	66.284	933430000	39	48336000	213510000	89483000	2630900	6308800	1496100	143530000	256040000	167700000	4380600	0	0	7	7	7	-1.18944	-0.703703	-1.2692	-5.4345	-2.54652	-5.99498	0.254247	-0.419207	-0.768457	-5.77969	-3.48576	-3.63968
	0.999259	0.767709	A0A0B5Z9L2	2399	30S ribosomal protein S12 GN=rpsL	7	7	7	55.7	55.7	55.7	15.446	0	21.579	704080000	26	107250000	227370000	125010000	313690	917660	749660	37995000	94950000	108230000	1286800	0	0	7	7	7	-0.679515	-0.308426	-0.795727	-6.5012	-5.66591	-3.76626	-1.71454	-1.66753	-0.704724	-5.30299	-4.47943	-3.70382
	0.995262	-1.02377	Q4MK98	asd	Aspartate-semialdehyde dehydrogenase GN=asd	12	12	12	46.8	46.8	46.8	38.089	0	79.052	618330000	66	27880000	86891000	47314000	6600400	16978000	2560900	102900000	129070000	182510000	14620000	1007200	0	12	12	12	-2.1298	-2.23358	-1.9443	-1.57391	-1.84715	-1.49682	-0.777507	-2.00958	-0.449279	-3.11709	-3.01727	-4.11847
	0.992842	1.02887	Q4MJ34	105	Xaa-His dipeptidase family protein GN=pepD	7	7	7	18.2	18.2	18.2	54.445	0	17.664	49326000	20	6228700	12220000	8472200	3351600	5007800	2502500	2622900	0	961990	7957900	0	0	7	7	7	-4.64398	-4.8397	-4.0928	-5.0309	-3.88989	-6.01648	-6.26382	-5.62505	-4.77422	-3.82904	-4.65443	-4.07649
	0.991811	-0.560459	Q4MN79	ldh	L-lactate dehydrogenase GN=ldh	9	9	4	44.3	44.3	27.1	34.62	0	33.222	460180000	33	31424000	75634000	48050000	0	426450	246890	60251000	104270000	139880000	0	0	0	4	9	9	-1.88057	-2.41363	-2.05327	-5.80659	-4.16809	-7.16859	-1.24367	-1.96381	-1.45861	-6.02782	-4.36749	-3.42263
	0.988212	1.47729	Q4MH25	2368	30S ribosomal protein S11 GN=rpsK	10	10	10	69.8	69.8	69.8	13.739	0	148.71	2343900000	100	293490000	716140000	389510000	477520	878150	464470	148620000	486660000	305650000	1994100	0	0	10	10	10	1.20149	1.05905	1.07428	-6.96709	-6.82372	-4.18902	-1.75542	0.467338	0.191029	-6.34274	-4.1581	-3.75163
	0.988209	0.936998	A0A0B5Z6K9	52	Bacillolysin GN=AQ16_52	9	7	7	13.4	10.9	10.9	97.574	0	20.413	46162000	12	6549100	20831000	12769000	1473400	0	819200	2299300	1421000	0	0	0	0	7	7	9	-4.00635	-4.12657	-3.78399	-6.48383	-5.70031	-5.96882	-4.38322	-5.76824	-4.57644	-7.27827	-2.72055	-3.5505
	0.987514	-0.504098	Q4MSG1	1152	Oligopeptidase GN=pz-A	12	12	12	26.1	26.1	26.1	66.201	0	129.04	224740000	44	2058800	2261100	1654800	6795800	15804000	8143400	8629600	21835000	4132400	93487000	14185000	45758000	12	12	12	-5.4393	-6.13917	-5.79322	-3.33368	-3.88591	-2.5621	-5.36527	-5.03561	-5.45851	0.0822399	-0.724124	0.089343
	0.974934	1.22679	Q4MGA4	4481	Bacterial extracellular solute-binding s, 5 Middle family protein GN=AQ16_4481	26	24	22	48.7	45.5	40.7	63.642	0	169.13	508740000	125	0	5783000	503130	52145000	108820000	40189000	0	529960	0	209030000	52369000	39368000	22	24	26	-5.0922	-3.33401	-5.04426	0.422608	0.309562	0.650699	-5.9192	-5.52006	-5.71158	0.941541	1.39403	-0.375361
	0.974878	0.633389	Q4MM15	secA	Protein translocase subunit SecA GN=secA	10	10	10	14.6	14.6	14.6	95.048	0	36.23	57610000	23	8137400	19391000	10505000	0	476870	0	12336000	5328600	1434600	0	0	0	10	10	10	-4.09984	-4.40307	-4.00127	-4.56534	-6.345	-5.43233	-5.3363	-4.67414	-4.3939	-6.88856	-3.01905	-4.70495
+	0.974835	2.17635	Q4MMM4	4301	Subtilase family protein GN=AQ16_4301	10	9	9	25.9	24.8	24.8	67.821	0	41.243	114830000	34	14902000	46442000	18275000	16159000	10378000	6713900	1965200	0	0	0	0	0	9	9	10	-3.7338	-3.32678	-3.17049	-1.7413	-2.08983	-2.10512	-3.62915	-7.13494	-5.99602	-6.36693	-4.88268	-5.67032
	0.969283	-0.947833	A0A0B5Z7R1	4954	Uncharacterized protein GN=AQ16_4954	15	15	15	37.4	37.4	37.4	67.354	0	51.46	373380000	56	29160000	63694000	16834000	0	0	0	74427000	144090000	41954000	3217200	0	0	15	15	15	-2.46136	-2.66449	-3.06871	-6.88209	-7.11743	-5.14529	-1.82373	-1.0338	-2.49352	-4.24869	-3.69572	-4.16919
	0.968326	-0.397224	Q4MH02;A0A0B5Z1U6	fabG	3-oxoacyl-[acyl-carrier-protein] reductase GN=fabG	14	14	14	76.8	76.8	76.8	26.102	0	252.66	2366500000	151	217860000	420010000	240390000	1707700	539700	0	296690000	575620000	613040000	587260	0	0	NaN	NaN	NaN	0.793758	0.205007	0.547809	-5.14003	-5.21789	-5.35739	0.935783	0.749804	1.05266	-5.31877	-4.45516	-4.5069
	0.966464	-0.722786	A0A0B5ZH44	4206	30S ribosomal protein S16 GN=rpsP	6	6	6	58.9	58.9	58.9	10.118	0	323.31	968020000	60	48004000	204200000	85509000	0	0	0	104400000	277450000	247680000	770300	0	0	6	6	6	-1.83887	-0.952114	-1.40163	-6.43353	-5.99652	-5.83566	-1.08147	-0.25362	-0.689169	-7.01045	-4.13663	-3.69891
	0.963473	-0.258937	Q4MN98	3129	1,4-dihydroxy-2-naphthoyl-CoA synthase GN=menB	12	12	11	54.8	54.8	52.2	29.583	0	164.68	1167400000	98	113360000	239090000	97430000	2757500	7312400	710000	116100000	296880000	285420000	4960600	3335000	0	11	12	12	-0.228928	-0.488816	-0.521656	-4.14176	-3.17647	-5.13828	-0.323896	-0.0836055	-0.0550883	-4.91638	-3.52354	-4.78542
	0.956529	0.784328	Q4ML28	1815	3D domain protein GN=AQ16_1815	39	39	39	78.2	78.2	78.2	46.284	0	323.31	13766000000	505	1314800000	5420000000	2728800000	5470900	439310	590480	1034200000	1680900000	1575100000	630360	1412600	4003900	39	39	39	3.09607	3.53836	3.80843	-5.80686	-6.94642	-5.14153	3.32923	2.26829	2.49236	-7.26485	-4.2307	-0.716904
	0.956298	1.62659	A0A0B5Z6V4	2525	DNA gyrase subunit A GN=gyrA	10	10	10	15.2	15.2	15.2	92.336	0	27.284	172770000	23	27858000	47726000	35355000	996220	3911700	1016500	3863300	46235000	4258600	0	0	1551100	10	10	10	-2.32082	-2.71125	-2.35809	-5.11845	-5.3462	-5.60423	-4.67785	-2.53256	-5.05953	-6.30888	-1.95814	-4.76106
	0.952423	0.583379	Q4MIM5	3883	2-oxoisovalerate dehydrogenase subunit beta GN=bfmBAB	18	18	18	68.2	68.2	68.2	35.805	0	251.04	2964900000	335	189030000	516660000	213770000	309600000	286440000	94944000	126810000	193240000	307180000	465570000	88502000	173110000	18	18	18	0.536189	0.332304	-0.0979796	1.47799	1.59746	0.927785	-0.175844	-0.755019	-0.0487605	1.55001	2.07724	2.34095
	0.944756	0.594231	Q4MWF6	1584	S-layer protein sap GN=sap	24	23	23	37.7	36.9	36.9	87.325	0	169.96	186980000	56	4681400	6728300	4895800	21735000	55042000	31036000	2817700	10167000	9344400	33770000	3531600	3235500	23	23	24	-4.50177	-4.08004	-4.7818	-2.27142	-0.908843	0.974711	-5.15426	-4.6402	-5.35184	-3.17212	-2.58814	-3.38241
	0.940481	-1.00716	Q4MND6	hpt	Hypoxanthine phosphoribosyltransferase GN=hpt	4	4	4	32	32	32	19.877	0	17.162	90110000	14	9774600	11172000	3488100	0	525550	0	17224000	31290000	16636000	0	0	0	4	4	4	-3.69668	-4.66456	-5.06998	-6.84096	-6.90028	-5.7444	-2.91103	-3.60626	-3.89245	-5.22534	-3.95311	-3.56891
	0.938747	-0.615953	Q4MMT5	3954	Phosphopentomutase GN=deoB	26	26	26	54.3	54.3	54.3	44.02	0	318.92	2998200000	348	133290000	392450000	219560000	169140000	194070000	69492000	361380000	303240000	679690000	261790000	81666000	132410000	26	26	26	-0.191183	-0.0509044	-0.0382249	0.545724	0.802894	0.479255	0.761391	-0.0790713	0.885227	0.909734	2.08923	1.64386
	0.937421	0.657422	Q4MKC4	proS	Proline--tRNA ligase GN=proS	18	18	18	45.9	45.9	45.9	63.081	0	129.04	462500000	80	63180000	128990000	82840000	0	0	0	37628000	125070000	24788000	0	0	0	18	18	18	-1.48703	-1.68153	-1.41055	-5.70099	-5.52838	-6.09893	-1.96647	-1.77505	-2.80985	-6.53498	-3.36265	-3.44656
	0.931061	-0.467733	A0A0B5YX30	3404	ATP-dependent 6-phosphofructokinase GN=pfkA	17	17	17	58.3	58.3	58.3	34.308	0	315.09	3019800000	266	203030000	523510000	307730000	89411000	91398000	32145000	247420000	419070000	777160000	217480000	43084000	68398000	17	17	17	0.381789	0.261877	0.408989	0.672331	0.064412	0.0636553	0.64023	0.5398	1.27582	0.307596	-0.49625	-0.949714
	0.928741	-0.478543	A0A0B5ZDM5	1683	3D domain protein GN=AQ16_1683	58	58	56	88.9	88.9	85.7	43.635	0	323.31	45546000000	1067	3271700000	9724000000	4870200000	3131700	10573000	3773000	7236100000	8300100000	12108000000	3894100	3048000	10591000	56	58	58	4.63833	4.71451	4.81976	-5.22671	-4.08662	-3.19883	5.29934	4.7561	5.55279	-6.33439	-5.44454	-5.49567
	0.925204	-0.566161	Q4MT72	850	Flagellar hook-associated protein 3 GN=flgL	13	13	13	60.3	60.3	60.3	32.07	0	71.982	413750000	47	40467000	67769000	41023000	0	0	0	68239000	105630000	88509000	2110400	0	0	13	13	13	-2.20687	-2.55655	-2.30355	-7.17812	-6.8333	-6.37364	-1.33204	-2.25427	-1.78219	-3.70692	-3.33823	-4.13828
	0.922174	-0.50293	Q4MPF7	1344	Catalase GN=AQ16_1344	16	16	16	43.6	43.6	43.6	55.848	0	250.16	409430000	93	25956000	69082000	25761000	8053500	21640000	4132000	43249000	117160000	36563000	44561000	6576100	6699000	16	16	16	-2.60849	-2.79314	-2.56959	-2.50774	-1.91751	-1.98011	-2.04925	-1.79158	-2.62159	-2.28912	-0.68932	-4.12609
	0.920984	0.62916	Q4MH83	2455	ATP-dependent zinc metalloprotease FtsH GN=ftsH	10	10	10	21.5	21.5	21.5	70.143	0	43.93	295130000	31	43115000	78512000	41333000	0	1083800	0	16636000	71926000	41850000	671560	0	0	10	10	10	-1.7076	-2.32116	-2.27324	-5.11381	-4.47538	-6.30386	-3.16762	-2.29808	-2.72379	-7.33486	-2.49811	-3.39051
	0.917908	1.03549	Q4MKB7	4237	Translation initiation factor IF-2 GN=infB	36	36	36	53.1	53.1	53.1	75.753	0	161.45	1452500000	118	221760000	471480000	253080000	0	2897700	0	157800000	263510000	79064000	1026100	1912200	0	36	36	36	0.749381	0.191823	0.584348	-5.86013	-7.17146	-5.46007	-0.0290952	-0.0243676	-1.52745	-5.81044	-3.60918	-5.32828
	0.914422	-0.544842	A0A0B5ZFP4	4208	Ribosome maturation factor RimM GN=rimM	3	3	3	25.7	25.7	25.7	19.302	0	6.8999	44521000	14	4153000	6589700	3781200	0	0	0	6532300	13456000	10009000	0	0	0	3	3	3	-4.8166	-5.63313	-5.0632	-7.28342	-5.69842	-5.60987	-4.89919	-4.51943	-4.45979	-6.34709	-4.75533	-5.18802
	0.912482	0.586529	A0A0B5Z8S6	714	Mannosyl-glycoendo-beta-N-acetylglucosaminidase family protein GN=AQ16_714	21	21	21	54.7	54.7	54.7	53.369	0	73.77	1064300000	88	115660000	345530000	180820000	2766400	4874100	1854400	102110000	145040000	133780000	29743000	2069900	0	21	21	21	-0.322707	-0.0295822	-0.167454	-3.44875	-3.88553	-2.53762	-0.233967	-1.22592	-0.819441	-1.49012	-2.14129	-3.38861
	0.912443	-1.85745	Q4MK30	1239	Dihydrolipoyllysine-residue succinyltransferase component of 2-oxoglutarate dehydrogenase complex GN=sucB	4	4	4	17.2	17.2	17.2	45.301	0	13.056	71383000	12	2189600	15181000	5723200	0	0	0	7502500	16364000	24422000	0	0	0	4	4	4	-7.23997	-4.13625	-6.07736	-5.4826	-5.13464	-6.30756	-3.66263	-4.53878	-3.67982	-6.85062	-3.57681	-3.09924
	0.908637	-0.640197	Q4MRH3	496	Bacterial extracellular solute-binding s, 5 Middle family protein GN=AQ16_496	13	13	13	32.7	32.7	32.7	63.001	0	52.487	157260000	44	0	0	0	7320900	15984000	7772500	942830	481990	0	96995000	7921000	19841000	13	13	13	-6.39733	-5.42731	-6.30513	-2.29254	-1.56197	-1.9367	-5.45216	-5.56812	-5.1889	-1.13426	-0.179173	-0.450899
	0.907988	-0.284879	Q4MM10	2831	Cell division ATP-binding protein FtsE GN=ftsE	10	10	10	56.5	56.5	56.5	23.56	0	45.149	501410000	40	51923000	101580000	49555000	0	0	0	60364000	114540000	123440000	0	0	0	10	10	10	-1.66812	-1.7654	-1.39862	-4.81816	-6.45781	-5.88561	-1.49589	-1.32165	-1.15997	-5.76746	-3.87271	-3.16848
	0.907051	1.14718	A0A0B5Z5U0	4095	GTP-binding protein TypA/BipA GN=typA	37	37	37	64.3	64.3	64.3	68.92	0	323.31	4554600000	345	601470000	1594300000	780420000	10986000	31180000	4396200	398310000	884330000	247350000	1460700	0	381130	37	37	37	2.14753	1.65787	1.95859	-2.04556	-1.4813	-3.0391	1.02517	1.61658	-0.319303	-5.66507	-2.1186	-2.64621
+	0.901702	1.93416	Q4MS46	3582	GTPase Obg GN=cgtA	11	11	11	40.4	40.4	40.4	47.21	0	52.925	288050000	43	41603000	138730000	49732000	0	468030	0	16817000	3093200	37605000	0	0	0	11	11	11	-2.021	-1.78634	-1.75366	-4.82761	-6.495	-4.70948	-3.03254	-5.76387	-2.56707	-7.02137	-4.12093	-4.55257
	0.901303	0.826543	Q4MGX3	4158	Pseudouridine synthase GN=AQ16_4158	3	3	3	12.3	12.3	12.3	33.99	0	6.0678	33095000	10	4382900	17626000	5489100	0	0	0	0	0	5597100	0	0	0	3	3	3	-4.93442	-4.77163	-4.51901	-5.60448	-6.10783	-3.89141	-5.30773	-6.37252	-5.02444	-7.94719	-4.50479	-4.07261
	0.897738	0.936463	Q4MKB4	4240	tRNA pseudouridine synthase B GN=truB	5	5	5	24.1	24.1	24.1	34.66	0	61.172	98219000	18	10551000	30336000	20228000	197870	0	0	9239500	8093400	19574000	0	0	0	5	5	5	-3.50415	-3.63153	-3.18689	-4.92275	-8.22666	-5.22724	-4.77519	-4.91246	-3.44432	-7.0441	-4.68146	-4.1948
	0.892603	-0.579767	Q4MI94	2416	Glutamate--tRNA ligase GN=gltX	18	18	18	38.4	38.4	38.4	55.616	0	173.7	1395700000	158	89326000	253980000	159840000	25780000	36225000	10905000	197010000	279800000	245490000	86720000	2390700	8219700	18	18	18	-1.18365	-0.79626	-0.484339	-1.02015	-0.668546	-0.135549	-0.0488985	0.0147825	-0.690828	-1.4622	-1.41939	-1.48529
	0.887395	-0.804281	Q4MTL6	4021	Acetyl-CoA acetyltransferase GN=thlA	15	15	15	44	44	44	41.883	0	104.91	320740000	100	2605200	5828800	1334900	97925000	85220000	35513000	2095800	0	2755500	72099000	9938600	5426900	15	15	15	-5.43789	-6.80008	-5.94183	0.180719	0.276753	-0.173613	-5.54035	-5.10946	-5.11714	-0.824692	-1.42337	-3.403
	0.88202	-0.678969	Q4MU26	239	2-(Hydroxymethyl)glutarate dehydrogenase GN=hgd	12	12	12	48.3	48.3	48.3	32.292	0	49.544	82370000	23	0	3518600	0	3635900	4856100	788800	0	0	0	53403000	7802600	8365000	12	12	12	-6.39695	-6.54652	-5.72528	-2.94625	-3.52353	-6.2992	-5.06609	-5.6308	-5.93496	-1.02593	-1.08426	-2.84772
	0.87522	-0.750452	Q4ML19	1808	Putative nucleic acid binding OB-fold tRNA/helicase-type GN=AQ16_1808	25	25	25	56.3	56.3	56.3	56.058	0	323.31	4609700000	497	103590000	378100000	279860000	524530000	576520000	204300000	457780000	491070000	365850000	715880000	182920000	329310000	25	25	25	-0.204663	0.201975	0.648929	3.46244	2.90741	3.07606	1.5717	0.806037	0.519863	2.59814	2.82695	2.4965
	0.870637	1.38629	Q4MXE9	4829	Pyridoxal phosphate-dependent enzyme, D-cysteine desulfhydrase family protein GN=AQ16_4829	9	9	9	31.7	31.7	31.7	35.433	0	22.574	145830000	27	13781000	48915000	13775000	1253900	1576000	1076300	3127100	1862000	32891000	20164000	4331800	3080300	9	9	9	-3.4705	-3.18379	-3.2284	-5.84358	-5.50614	-3.24619	-5.11676	-5.67923	-3.24556	-2.70514	-2.94383	-3.59155
	0.856447	0.532632	Q4MMK1	4279	YmdB-like family protein GN=AQ16_4279	10	10	10	44.7	44.7	44.7	29.084	0	69.618	321160000	53	53560000	100880000	50808000	1903100	505940	207200	27779000	41666000	42874000	975830	0	0	10	10	10	-1.33204	-2.11092	-2.04919	-3.17462	-5.8924	-4.80408	-2.64014	-2.30074	-2.14917	-6.23695	-3.73804	-4.09617
	0.854724	-0.332149	Q4MFZ8	2633	Putative heme-dependent peroxidase AQ16_2633 GN=AQ16_2633	14	14	14	50.6	50.6	50.6	28.651	0	131.66	610970000	100	29607000	57918000	26260000	26783000	32393000	13414000	32530000	97733000	105150000	137420000	10517000	41253000	14	14	14	-2.01495	-2.50904	-2.04734	-0.469554	-1.08699	-0.540301	-1.97293	-1.90865	-1.6933	-0.386176	0.659332	-0.314277
	0.84923	0.157548	Q4MGQ1	2402	DNA-directed RNA polymerase subunit beta GN=rpoB	91	91	91	72.9	72.9	72.9	131.87	0	323.31	13773000000	815	1355400000	3475800000	1796000000	121800000	183080000	58725000	1153200000	2935000000	2424200000	241160000	9587700	18769000	91	91	91	3.20042	3.12004	3.33001	1.42429	1.51875	1.69883	3.00566	3.18041	2.99176	1.07062	-1.18329	-1.52257
	0.848719	0.548757	A0A0B5ZJ74	2389	50S ribosomal protein L22 GN=rplV	11	11	11	70.8	70.8	70.8	12.509	0	251.47	3567800000	151	393670000	1201500000	413290000	825800	1176600	0	286490000	692280000	572370000	6199600	0	0	11	11	11	1.62831	1.72018	1.15349	-5.32358	-8.37505	-5.13502	0.466615	1.23233	1.15676	-3.81435	-3.06154	-4.53681
	0.844205	-0.715648	Q4MU27	238	Methylmalonate semialdehyde dehydrogenase [acylating] GN=mmsA	6	6	6	17.7	17.7	17.7	53.004	0	29.227	36237000	22	0	1083400	1167500	1916200	11298000	4351400	0	0	0	15694000	0	727070	6	6	6	-6.19265	-7.01886	-5.68742	-3.15708	-3.32483	-2.12058	-5.52119	-5.51559	-5.71521	-3.87861	-3.92064	-4.548
	0.840584	-1.58452	A0A0B5ZEA8	3433	Putative aminopeptidase ysdC GN=AQ16_3433	11	11	10	41.8	41.8	39.9	39.469	0	134.28	278210000	52	0	16029000	2225400	16026000	17704000	7488100	3353400	14608000	38712000	144190000	5502500	12373000	10	11	11	-6.36649	-4.07144	-6.37539	-2.17227	-1.88101	-2.50091	-4.77192	-3.9747	-3.31314	0.446566	-1.89093	-1.35706
	0.840301	-0.718066	Q4MNV8;Q4MWZ4	3753	Penicillin binding transpeptidase domain protein GN=AQ16_3753	39	39	39	57.4	57.4	57.4	79.631	0	164.92	1976100000	211	190990000	281280000	218620000	648540	1207200	469850	376340000	611340000	294290000	403880	556780	0	NaN	NaN	NaN	0.228666	-0.459279	0.14336	-6.76488	-6.56871	-4.75916	1.16559	0.851748	0.0496079	-6.38373	-4.14385	-4.37833
	0.833235	-1.06848	A0A0B5ZKS3	lef	Lethal factor GN=lef	12	12	12	19.7	19.7	19.7	93.404	0	71.175	173530000	36	9516700	11593000	5520000	1009100	772650	431530	49492000	66954000	24332000	3905300	0	0	12	12	12	-3.60744	-4.16036	-3.80322	-5.2557	-6.89073	-4.5576	-2.14064	-2.29536	-3.92956	-4.00484	-3.32747	-2.93799
	0.829998	-1.27569	Q4MGI9	2689	Thymidine kinase GN=tdk	4	4	4	35.6	35.6	35.6	21.643	0	12.49	113530000	17	4650700	32439000	1817400	0	0	0	15745000	36166000	22317000	0	397680	0	4	4	4	-3.6597	-3.96371	-5.91948	-6.30435	-7.12115	-3.91496	-3.39562	-3.1891	-3.13109	-6.20165	-4.28864	-3.27812
	0.828054	-0.28091	A0A0B5ZIU3	mtnN	5-methylthioadenosine/S-adenosylhomocysteine nucleosidase GN=mtnN	12	12	12	67.1	67.1	67.1	25.3	0	117.74	807590000	99	68295000	160670000	43843000	1017600	0	829910	77315000	238310000	212590000	0	4724100	0	12	12	12	-0.983812	-1.27773	-1.3121	-5.95134	-6.37838	-4.75447	-1.13693	-0.852716	-0.74126	-5.8547	-2.78813	-4.02202
	0.815349	-0.207441	Q4MLY6	2853	HPr kinase/phosphorylase GN=hprK	12	12	12	41.1	41.1	41.1	34.584	0	52.894	726740000	87	44476000	141400000	77563000	23507000	24139000	13079000	62734000	85368000	117100000	101090000	17841000	18450000	12	12	12	-1.70648	-1.78469	-1.48125	-0.873712	-1.23035	-0.744361	-1.41715	-1.5929	-1.34005	-0.670934	-0.42429	-3.75268
	0.812742	-0.875475	Q4MX05	lepB	Signal peptidase I GN=lepB	2	2	2	13.1	13.1	13.1	20.592	0.0036188	3.8511	54759000	7	2332500	8624400	1701400	386560	0	0	8622200	17891000	15200000	0	0	0	2	2	2	-6.29373	-4.5803	-5.35984	-6.65702	-7.18879	-6.57156	-4.64369	-4.45212	-4.51163	-5.58578	-4.16906	-3.27469
	0.811871	-1.23728	Q4MSH8	1136	Ribonucleotide reductase, barrel domain protein GN=AQ16_1136	7	7	7	39.1	39.1	39.1	32.312	0	50.713	185270000	25	14336000	11239000	6436000	0	0	0	23896000	101270000	26084000	2012100	0	0	7	7	7	-3.0917	-3.74653	-4.90766	-6.83713	-5.66717	-5.57845	-2.35604	-2.08499	-3.59301	-6.06417	-2.40115	-3.41693
	0.808919	-0.592663	Q4MJI2	2750	3-hydroxyacyl-[acyl-carrier-protein] dehydratase FabZ GN=fabZ	5	5	5	29.2	29.2	29.2	16.098	0	10.663	231060000	25	6682900	42361000	23682000	0	668820	524090	18466000	45886000	70960000	19250000	2388900	191550	5	5	5	-3.72518	-3.02768	-3.10373	-6.98342	-6.28752	-6.44903	-3.14032	-2.68835	-2.24994	-2.82196	-1.87936	-3.69607
	0.806758	-0.440792	Q4MSZ0	917	Rhodanese-like domain protein GN=AQ16_917	2	2	2	10.8	10.8	10.8	31.513	0	5.6598	23953000	4	1414800	0	0	0	0	0	5741800	7216400	6594400	2985400	0	0	2	2	2	-5.44048	-5.83163	-5.13949	-5.97321	-6.66672	-5.12393	-4.72352	-5.15462	-5.21108	-5.36229	-2.61217	-2.96035
	0.805465	0.480429	Q4MTG5	4073	Ribonuclease J GN=rnjA	24	24	24	50.5	50.5	50.5	61.799	0	142.97	1094700000	130	128180000	261630000	157030000	39395000	45404000	11685000	94618000	223860000	122940000	7323700	0	2644800	24	24	24	-0.283016	-0.56554	-0.447657	-0.213134	-0.495023	-0.310257	-0.500479	-0.8343	-1.40272	-4.00663	-5.47904	-5.08791
	0.804669	1.38235	Q4MJM2	3693	Ribosome biogenesis GTPase YqeH GN=yqeH	7	7	7	21.5	21.5	21.5	41.301	0	24.8	75511000	13	12544000	38827000	9413600	0	0	0	1105800	1477300	12144000	0	0	0	7	7	7	-3.7217	-3.75522	-3.49164	-6.20133	-6.53475	-5.29487	-5.19779	-6.32029	-3.59754	-7.12354	-2.83716	-4.14844
	0.79206	1.69494	Q4MJK6	3709	Elongation factor 4 GN=lepA	11	11	11	27.3	27.3	27.3	67.933	0	34.783	97822000	22	16616000	34073000	19339000	0	1136600	0	3861400	22796000	0	0	0	0	11	11	11	-3.36987	-3.94692	-3.04103	-8.00086	-5.23086	-5.93298	-6.04921	-3.24456	-6.14888	-7.12011	-3.57604	-3.65528
	0.785947	0.659028	Q4MQ70	clpP	ATP-dependent Clp protease proteolytic subunit GN=clpP	6	6	6	26.9	26.9	26.9	21.419	0	14.416	171510000	21	22072000	73527000	25428000	0	550550	0	5545300	24741000	18895000	755770	0	0	6	6	6	-3.14956	-3.02794	-3.01351	-6.05459	-7.02144	-6.33227	-4.48778	-3.40685	-3.27346	-6.63716	-4.17593	-4.41528
	0.784442	-0.210065	Q4MRC0	3063	Glycine--tRNA ligase GN=glyS	16	16	16	38.6	38.6	38.6	53.018	0	41.711	318340000	40	14786000	98025000	42209000	0	0	0	33659000	59736000	69929000	0	0	0	16	16	16	-2.4412	-2.41126	-2.12508	-5.23625	-5.49934	-5.38399	-1.99291	-2.2405	-2.11393	-5.28649	-3.50692	-3.33343
	0.77748	-0.263777	Q4MK96	dapA	4-hydroxy-tetrahydrodipicolinate synthase GN=dapA	11	11	11	54.5	54.5	54.5	31.247	0	99.224	549130000	86	40652000	147630000	32928000	0	0	0	53067000	145240000	128320000	1296800	0	0	11	11	11	-1.89374	-1.60912	-1.92503	-5.37577	-6.68159	-5.4336	-1.77832	-1.47833	-1.37991	-7.0152	-3.6129	-4.59723
	0.775991	0.672669	A0A0B5YYT6	2661	Collagen binding domain protein GN=AQ16_2661	52	52	51	42.2	42.2	38.3	205.71	0	323.31	2272800000	305	231750000	677150000	283890000	41958000	39305000	27301000	262670000	361190000	135160000	78098000	79425000	54950000	51	52	52	0.507743	0.542581	0.0963542	-0.270113	-0.959871	-0.120183	0.245173	-0.108801	-1.0077	-0.629024	2.09995	0.604187
	0.774461	-0.317842	A0A0B5Z355;Q4MMM1	2785	Type I phosphodiesterase / nucleotide pyrophosphatase family protein GN=AQ16_2785	39	39	39	57.5	57.5	57.5	73.46	0	323.31	17827000000	948	1030800000	4680500000	1724700000	139420000	171570000	50888000	1712400000	4038700000	3979000000	161730000	36607000	100230000	NaN	NaN	NaN	2.70414	3.30235	2.95689	1.04926	0.964453	0.892782	3.16256	3.33548	3.41886	0.400314	0.230968	1.04502
	0.772001	-0.561446	Q4MJ82	3847	Acetyl-CoA carboxylase, biotin carboxyl carrier protein GN=accB	5	5	5	35.2	35.2	35.2	17.864	0	40.684	263910000	33	31985000	45012000	35699000	0	0	0	29353000	59839000	62017000	0	0	0	5	5	5	-2.32071	-3.14145	-2.23738	-5.09287	-5.29242	-5.91287	-1.66811	-2.13054	-2.21656	-7.38704	-4.57825	-3.16172
	0.77058	0.512551	Q4MJI1;Q4MM27;Q4MM28	2749; 2818	UDP-N-acetylglucosamine 2-epimerase GN=AQ16_2749;UDP-N-acetylglucosamine 2-epimerase GN=AQ16_2818	16	16	16	59.6	59.6	59.6	41.609	0	151.26	856360000	74	64362000	263700000	127070000	417800	1696700	200290	47724000	108200000	242690000	298250	0	0	NaN	NaN	NaN	-0.55484	-0.472533	-0.693821	-5.7734	-3.96479	-6.28741	-0.719825	-1.67972	-0.859295	-6.73733	-4.63232	-3.59429
	0.766656	-0.934367	Q4MMD5	642	Uncharacterized protein GN=AQ16_642	7	7	7	16.4	16.4	16.4	48.74	0	17.273	38694000	14	0	0	0	3649900	3418500	2104300	2289800	9477500	9111800	8642700	0	0	7	7	7	-6.98194	-5.65649	-5.74192	-3.42628	-4.26433	-3.63043	-4.88136	-5.91479	-4.7811	-3.93346	-1.98448	-3.90289
	0.766116	-1.02188	Q4MK97	4258	Aspartokinase GN=AQ16_4258	6	6	6	21.7	21.7	21.7	44.22	0	11.698	64242000	11	1938300	15551000	14540000	0	0	0	8847300	12245000	11120000	0	0	0	6	6	6	-4.80813	-4.7267	-6.47861	-5.77508	-5.8866	-5.32261	-4.09117	-4.76766	-4.08896	-7.33114	-4.23814	-4.74658
	0.762553	0.342569	A0A0B5ZBM5	2383	50S ribosomal protein L24 GN=rplX	14	14	14	90.3	90.3	90.3	11.228	0	169.6	2792600000	128	316710000	748770000	396830000	0	0	0	217370000	619680000	493250000	0	0	0	14	14	14	1.18507	0.865511	1.26722	-6.8399	-5.72041	-5.66361	0.524817	1.08371	0.681566	-6.6562	-3.15347	-3.95924
	0.762059	0.600615	A0A0B5YY82	4194	DAK2 domain fusion YloV family protein GN=AQ16_4194	12	12	12	29	29	29	60.559	0	134.38	411950000	53	59008000	122150000	70841000	759570	0	0	60480000	83935000	14219000	561970	0	0	12	12	12	-1.45725	-1.76741	-1.45944	-6.93026	-6.49141	-6.06187	-1.71069	-1.9296	-2.84566	-5.74072	-3.40005	-3.35601
	0.757209	-0.312086	A0A0B5YV23	4205	Signal recognition particle protein GN=ffh	7	7	7	23.2	23.2	23.2	49.516	0	16.289	62911000	13	4708300	23679000	5414200	0	0	0	4689400	12371000	12049000	0	0	0	7	7	7	-4.84839	-4.2562	-4.60281	-5.24045	-7.86154	-6.5161	-4.38853	-4.27023	-4.11239	-5.73734	-2.94484	-3.98957
	0.755545	0.712424	Q4MST1	972	Tetratricopeptide repeat family protein GN=AQ16_972	6	6	6	20	20	20	48.4	0	25.067	92779000	14	8489200	30782000	17798000	0	0	0	7031400	2333500	26345000	0	0	0	6	6	6	-3.78391	-3.96526	-3.20255	-5.82019	-6.33907	-4.7829	-4.1867	-5.06877	-3.83352	-6.33701	-3.39897	-5.01634
	0.75049	-0.654188	Q4MMR4;Q4MU50	981	DNA-binding protein HU GN=hup	8	8	8	83.3	83.3	83.3	9.729	0	241.75	385330000	59	17668000	60483000	41040000	1270000	628160	2863000	57542000	126610000	76580000	656060	0	0	NaN	NaN	NaN	-2.89905	-2.15011	-2.14996	-6.09411	-7.25882	-2.76782	-1.5055	-1.36479	-2.36626	-4.40417	-4.0939	-5.30271
	0.749954	0.333635	Q4MGF0	2625	Cof-like hydrolase family protein GN=AQ16_2625	5	5	5	27.1	27.1	27.1	30.519	0	42.429	117640000	25	14609000	33757000	7460100	0	0	0	4109600	26577000	31122000	0	0	0	5	5	5	-3.29271	-3.8208	-3.30443	-7.32174	-7.18603	-4.99621	-3.63482	-4.00276	-3.78127	-5.79642	-4.65265	-5.47121
	0.749236	-1.29489	Q4MTJ4	4042	5-methyltetrahydropteroyltriglutamate--homocysteine methyltransferase GN=metE	29	29	29	41.1	41.1	41.1	87.471	0	242.73	925120000	171	0	1399100	2270600	118000000	197340000	75668000	3660100	0	1456400	337720000	79883000	107720000	29	29	29	-6.58812	-7.23858	-5.62432	1.54268	1.59532	2.17748	-3.94237	-5.55662	-6.06736	1.54394	0.885189	-0.163109
	0.747249	-0.559143	Q4MSG8	1145	NADPH-dependent 7-cyano-7-deazaguanine reductase GN=queF	6	6	6	41.8	41.8	41.8	19.528	0	18.212	131020000	15	10456000	18289000	11583000	0	0	0	17122000	37766000	33588000	2220400	0	0	6	6	6	-3.76346	-3.87323	-3.91344	-5.79805	-5.80807	-4.47576	-3.82357	-2.65679	-3.39234	-4.4887	-3.69363	-4.21705
	0.744653	-1.49464	Q4MJ94	3834	Elongation factor P GN=efp	2	2	2	25.4	25.4	25.4	20.737	0	5.5704	390130000	18	34996000	62245000	37500000	0	0	0	68497000	91539000	95349000	0	0	0	2	2	2	-2.57676	-2.8087	-5.4409	-6.05998	-8.11641	-4.88699	-1.98843	-2.23386	-2.12015	-5.3702	-2.59043	-2.19166
	0.743132	-1.14521	Q4MH98	2338	Arginase GN=rocF	13	13	13	43.4	43.4	43.4	32.32	0	85.277	261050000	61	1328500	5454000	1281400	43997000	46677000	19994000	2606600	0	0	68533000	24839000	46343000	13	13	13	-4.62322	-6.87284	-6.54898	-0.916623	-0.722549	-0.106414	-4.80274	-5.03675	-4.76992	-0.49228	0.652578	0.182783
	0.73904	0.657462	Q4MT71	851	Flagellar hook-associated protein 1 GN=flgK	13	13	13	43.5	43.5	43.5	48.288	0	66.582	330450000	44	24620000	110350000	43654000	2635400	6162900	919470	55471000	21842000	59365000	4331400	0	1104700	13	13	13	-2.1284	-1.72934	-1.85871	-2.96394	-3.74464	-4.27254	-1.96998	-3.30013	-2.41872	-4.16608	-3.06704	-3.83622
	0.736833	-0.565639	Q4MSH9	1135	Ribonucleoside-diphosphate reductase subunit beta GN=AQ16_1135	10	10	10	35.1	35.1	35.1	36.977	0	49.967	288020000	36	12439000	80001000	21974000	596970	4161800	674230	48795000	44712000	62993000	11670000	0	0	10	10	10	-3.44828	-2.66174	-2.678	-7.74353	-3.65943	-2.96043	-1.98066	-2.79922	-2.31123	-2.77398	-2.14443	-4.0225
	0.735276	1.38197	Q4MJM0	3695	CRS1 / YhbY domain protein GN=AQ16_3695	5	5	5	62.9	62.9	62.9	11.062	0	15.378	115410000	14	6005000	54646000	3275800	0	0	0	1280000	30605000	18202000	0	0	1392900	5	5	5	-3.92469	-3.261	-3.83216	-6.23933	-5.94679	-6.04395	-4.97416	-3.6482	-6.54138	-6.85357	-3.24984	-3.4126
	0.731911	0.553377	A0A0B5Z2K6	pyrH	Uridylate kinase GN=pyrH	10	10	10	60	60	60	25.87	0	213.91	742310000	72	84099000	225400000	78225000	1638900	0	0	81254000	160440000	110510000	733770	0	0	10	10	10	-0.663089	-0.762343	-1.31463	-5.27296	-6.77079	-5.76944	-2.01499	-1.29894	-1.08626	-8.26308	-1.62183	-1.99062
	0.731149	-0.267194	Q4MLF8	2537	Ribosomal RNA small subunit methyltransferase G GN=rsmG	7	7	7	28.5	28.5	28.5	27.195	0	55.107	236030000	21	24203000	40913000	32173000	0	0	0	26482000	59016000	53240000	0	0	0	7	7	7	-2.77055	-3.18447	-2.69476	-6.71601	-6.07389	-4.05955	-2.73777	-2.61432	-2.49612	-6.15329	-1.9622	-4.02563
	0.728435	-0.925739	Q4MWC8	1559	Uncharacterized protein GN=AQ16_1559	4	4	4	42	42	42	12.376	0	174.68	342010000	68	0	0	2169400	11322000	13621000	2796700	1309000	12297000	3072400	128640000	57314000	109470000	4	4	4	-5.45001	-5.51334	-5.35603	-2.28028	-2.6311	-2.4755	-5.13481	-3.35469	-5.05265	-0.203535	1.18446	0.703455
	0.72196	-0.4546	Q4MMZ8	3897	Peptidase M20/M25/M40 family protein GN=AQ16_3897	16	16	16	46.5	46.5	46.5	39.568	0	158.45	853040000	132	29598000	93165000	83909000	32337000	32341000	10968000	72801000	121710000	209880000	113580000	17560000	35188000	16	16	16	-1.71781	-1.75525	-1.24908	-0.416936	-1.07911	-0.0321622	-0.834994	-1.5914	-0.931948	-0.483369	0.0763389	-0.25833
	0.715983	-0.666011	A0A0B5Z2R3	1137	Ribonucleoside-diphosphate reductase GN=AQ16_1137	9	9	9	28.2	28.2	28.2	43.26	0	48.975	319770000	25	18236000	29063000	20266000	0	0	219090	58529000	149250000	41617000	2591800	0	0	9	9	9	-2.25873	-2.92545	-2.45662	-5.63247	-5.27257	-4.72405	-1.56283	-1.44903	-2.63091	-7.57976	-3.42199	-4.2731
	0.714589	-0.330163	Q4MTF8	4080	Dihydrolipoamide acetyltransferase component of pyruvate dehydrogenase complex GN=pdhC	41	41	41	82.1	82.1	82.1	45.984	0	323.31	8164200000	394	566270000	1896200000	1052000000	8771300	11133000	3925800	1030000000	1781400000	1788800000	20589000	0	5140100	41	41	41	1.82398	2.34156	2.51885	-2.39559	-2.14323	-1.80776	2.54232	2.50976	2.6228	-2.60847	-4.02853	-2.29228
	0.713037	0.40639	Q4MVT1	thil	Probable tRNA sulfurtransferase GN=thiI	11	11	11	31.7	31.7	31.7	45.856	0	41.23	240460000	37	19278000	101510000	37490000	0	0	0	13586000	30193000	38403000	0	0	0	11	11	11	-2.48729	-2.3354	-2.20703	-6.07724	-8.17326	-3.90704	-2.53776	-3.24296	-2.46818	-6.86984	-4.43374	-3.70069
	0.69935	0.405981	A0A0B5Z8V4	2387	50S ribosomal protein L16 GN=rplP	7	7	7	53.5	53.5	53.5	16.172	0	22.395	776670000	41	108090000	251110000	72155000	1636100	0	1772500	43797000	182750000	111790000	2423200	1150200	0	7	7	7	-0.730172	-0.436866	-1.17586	-6.46912	-5.07583	-6.20165	-1.45587	-1.18455	-0.92043	-3.94014	-2.90712	-5.07819
	0.698081	-0.312926	Q4MKQ4	4520	Beta-lactamase enzyme family protein GN=AQ16_4520	6	6	6	20.3	20.3	20.3	42.132	0	14.241	116120000	17	13249000	16956000	9660700	0	0	0	12861000	36389000	27003000	0	0	0	6	6	6	-3.43897	-4.11766	-3.65564	-6.34944	-6.38063	-5.9044	-3.36832	-3.50471	-3.40046	-7.15126	-4.00428	-3.04484
	0.697	1.04418	Q4MIF0	2680	Probable DNA-directed RNA polymerase subunit delta GN=rpoE	2	2	2	18.2	18.2	18.2	20.737	0	14.499	156620000	13	14024000	40449000	20859000	0	2216700	691620	30281000	21916000	20574000	5614400	0	0	2	2	2	-3.40764	-3.31705	-3.76998	-6.80159	-7.07255	-5.13996	-3.26693	-4.83243	-5.52785	-4.15707	-3.95208	-3.56203
	0.694403	-0.723068	Q4MJK1	3714	Chaperone protein DnaK GN=dnaK	51	51	51	74.5	74.5	74.5	65.765	0	323.31	9914000000	503	844830000	1591900000	933130000	8254300	12976000	2995100	1747400000	3487000000	1187300000	75816000	4479300	17884000	51	51	51	2.65884	2.147	2.36384	-3.32572	-3.39032	-4.02408	3.46914	3.65175	2.218	-0.652631	-3.42766	-2.25028
	0.693753	0.74711	Q4MTA3	4132	Ribosomal RNA small subunit methyltransferase H GN=rsmH	5	5	5	19.7	19.7	19.7	34.9	0	20.363	150180000	12	14124000	41002000	22346000	3749000	6650400	0	1794700	19961000	26621000	13935000	0	0	5	5	5	-3.48448	-3.60002	-2.87391	-6.51983	-6.12641	-5.91786	-4.8581	-3.9867	-3.35493	-6.81255	-3.34524	-5.93579
	0.690791	0.136319	A0A0B5Z082	2530	Chromosomal replication initiator protein DnaA GN=dnaA	7	7	7	19.5	19.5	19.5	50.526	0	15.859	96123000	24	5692300	30292000	10849000	3690800	4034200	0	3260700	18932000	19372000	0	0	0	7	7	7	-4.1253	-3.99464	-3.94608	-5.49512	-6.72288	-5.40061	-4.20463	-4.01678	-4.25357	-6.60976	-3.42056	-3.35346
	0.686709	-0.482203	Q4MI19	2473	Bifunctional protein GlmU GN=glmU	13	13	13	39.9	39.9	39.9	49.447	0	50.535	318400000	38	15848000	107730000	31591000	814910	3354100	683000	24708000	56708000	74640000	2324500	0	0	13	13	13	-3.31083	-2.28241	-2.62788	-4.30065	-4.16166	-5.03753	-2.44256	-2.24852	-2.08342	-7.04322	-2.8554	-2.88778
	0.683172	0.610648	A0A0B5Z6I6	4260	Ribonuclease J GN=rnjB	27	27	27	49.6	49.6	49.6	60.933	0	137.22	1441300000	153	171960000	359180000	248500000	47708000	78311000	14101000	130090000	248190000	130660000	12629000	0	0	27	27	27	0.124819	-0.0971182	0.316609	-0.181448	-0.164132	-1.22402	-0.252275	0.0212425	-1.2566	-2.33698	-2.59114	-4.90929
	0.681535	0.530101	Q4MGV7	4218	Methylenetetrahydrofolate--tRNA-(uracil-5-)-methyltransferase TrmFO GN=trmFO	16	16	16	58.3	58.3	58.3	48.023	0	148.31	847540000	88	74692000	293220000	120850000	4282900	12869000	1685700	60321000	105840000	169990000	3784400	0	0	16	16	16	-1.17044	-0.083266	-1.00968	-2.70499	-3.3492	-2.53836	-1.38735	-1.38418	-1.08215	-3.86565	-3.50366	-3.13345
	0.677666	-0.235273	Q4MJH0	2739	Polysaccharide deacetylase family protein GN=AQ16_2739	8	8	8	26.2	26.2	26.2	32.357	0	13.945	154640000	21	8165900	56814000	21306000	3848400	5091400	0	12955000	20915000	24707000	841990	0	0	8	8	8	-3.54352	-3.63982	-3.22693	-3.85706	-3.81955	-4.53292	-3.07972	-3.412	-3.21273	-6.50153	-4.06466	-2.63626
	0.676113	-0.353141	Q4MMT3	pdp	Pyrimidine-nucleoside phosphorylase GN=pdp	20	20	17	58.1	58.1	53	46.212	0	302.4	1289500000	104	106750000	291120000	141690000	0	0	0	115530000	266040000	364540000	3371000	484680	0	17	20	20	-0.674917	-0.364527	-0.0625308	-7.68614	-7.09644	-4.67952	0.129252	-0.3301	0.158296	-9.00172	-3.04434	-5.81697
	0.675783	1.11837	Q4ML87	5099	ABC transporter family protein GN=AQ16_5099	26	26	26	48.6	48.6	48.6	61.099	0	151.92	1014500000	107	125400000	331500000	228280000	0	999190	0	98542000	157920000	68942000	2935300	0	0	26	26	26	-0.811479	0.0668977	0.292537	-6.76158	-5.48454	-4.9811	0.00198692	-1.5267	-2.28244	-4.40633	-4.6712	-4.08453
	0.674552	-0.337823	Q4MVW7	3388	Uncharacterized protein GN=AQ16_3388	20	20	20	64.1	64.1	64.1	40.71	0	184.54	1566000000	213	78147000	231380000	108740000	52587000	81661000	22612000	129940000	181270000	291730000	259150000	36185000	92603000	20	20	20	-1.04021	-0.485731	-0.658196	0.383243	-0.694781	-0.154084	-0.28071	-0.701128	-0.188825	0.802782	0.0704227	0.502857
	0.671582	0.298091	Q4MIB1	2710	ATP synthase subunit b GN=atpF	6	6	6	33.9	33.9	33.9	18.96	0	43.676	239820000	34	28910000	55046000	31477000	3122600	3643200	2630100	23965000	44465000	36832000	9726100	0	0	6	6	6	-2.39834	-2.67472	-2.70071	-3.18551	-3.70065	-1.83205	-2.59902	-2.86007	-3.20896	-4.19201	-3.03504	-3.97768
	0.655295	0.258627	A0A0B5Z2Y2	2650	Polyamine aminopropyltransferase GN=speE	18	18	18	62.2	62.2	62.2	31.143	0	84.414	1309400000	145	121900000	346710000	119640000	26425000	30783000	9475100	77633000	220500000	205100000	125200000	8701900	17366000	18	18	18	-0.455228	-0.352591	-0.261995	-1.03592	-1.34304	-1.07658	-0.587972	-0.921755	-0.335967	-0.147156	-0.799219	-0.361414
	0.649516	-0.292656	Q4MGD7	2375	50S ribosomal protein L15 GN=rplO	12	12	12	65.1	65.1	65.1	15.492	0	131.58	1830100000	78	175790000	429330000	191570000	279480	2661000	0	153010000	515570000	361940000	0	0	0	12	12	12	0.406791	0.193859	0.123695	-5.41158	-4.45016	-4.75451	0.252111	0.882661	0.46754	-4.41344	-2.50583	-3.36742
	0.64748	-0.437944	A0A0B5ZC88	2157	Glutamyl-tRNA(Gln) amidotransferase subunit A GN=gatA	16	16	16	43.3	43.3	43.3	52.32	0	125.27	670700000	72	44057000	182600000	92978000	2171700	1193300	0	62188000	122650000	159800000	1870300	0	1199900	16	16	16	-1.73715	-1.2479	-1.26885	-6.40629	-6.77684	-6.46808	-1.40102	-1.03561	-0.503448	-8.44899	-3.65524	-3.68888
	0.646938	-0.564614	Q4MRB4	3057	Phosphoglucomutase GN=pgcA	37	37	37	70	70	70	64.238	0	323.31	2791700000	242	124920000	254260000	143300000	137630000	165030000	65567000	283300000	753160000	268500000	380390000	51868000	163810000	37	37	37	0.317046	0.229216	-0.189846	0.692336	0.50986	0.751078	0.773073	1.26076	0.0164292	1.55768	2.16793	2.38607
	0.645223	0.486201	Q4MPP8	1431	Foldase protein PrsA GN=prsA1	9	9	9	37.8	37.8	37.8	32.685	0	68.403	162720000	31	14887000	48737000	36658000	422390	2466400	594870	12042000	18367000	25311000	3230100	0	0	9	9	9	-3.31105	-2.99738	-2.69187	-5.43624	-4.27304	-4.80852	-3.76457	-3.78718	-2.90715	-6.647	-3.81175	-3.74877
	0.639346	0.920421	Q4MPM3	1407	Uncharacterized protein GN=AQ16_1407	54	54	54	76.6	76.6	76.6	85.91	0	323.31	3602100000	366	466390000	1099600000	495310000	12935000	7225100	5051100	481930000	610610000	176440000	174600000	35271000	36748000	54	54	54	1.7805	1.56632	1.38347	-2.63433	-3.04649	-2.42146	1.46977	1.104	-0.60475	0.404054	1.05504	-0.748613
	0.637597	0.200957	Q4MQZ3	2947	L,D-transpeptidase catalytic domain protein GN=AQ16_2947	13	13	13	69.9	69.9	69.9	17.046	0	86.762	5745700000	138	622410000	1608100000	666730000	9729000	6970900	1489500	875320000	1172700000	776000000	5714500	0	548590	13	13	13	2.21936	2.13842	2.11081	-2.32688	-4.19168	-4.56794	2.16896	2.00065	1.69612	-4.51842	-3.9031	-3.58563
	0.633569	-0.239745	A0A0B5ZFR7	576	Bacterial SH3 domain protein GN=AQ16_576	41	41	41	89.8	89.8	89.8	44.112	0	323.31	64790000000	829	4803800000	14704000000	8515000000	11072000	6186000	466600	10055000000	12902000000	13767000000	19185000	1089900	4504000	41	41	41	5.26226	5.39319	5.68188	-5.29062	-6.28207	-5.44517	5.47086	5.71162	5.87409	-5.64739	-6.3358	-5.70552
	0.6273	-0.469881	A0A0B5Z7L1	fhs	Formate--tetrahydrofolate ligase GN=fhs	31	31	31	61.7	61.7	61.7	62.71	0	292.21	1856800000	298	38284000	114090000	52803000	126270000	131060000	66307000	80664000	182380000	87233000	596960000	110390000	270360000	31	31	31	-1.36926	-1.52979	-1.01464	1.10589	0.959892	0.916127	-0.614528	-0.45975	-1.42976	2.21302	2.29079	1.88657
	0.625113	-0.540666	A0A0B5Z8M8	3296	Peptidase M20/M25/M40 family protein GN=AQ16_3296	17	17	17	69.7	69.7	69.7	39.177	0	167.19	594240000	78	16755000	48848000	10796000	41193000	36433000	8576900	25635000	31888000	109240000	202530000	26986000	35367000	17	17	17	-3.42702	-3.55084	-3.91587	-0.751086	-1.50059	-2.44775	-3.40445	-3.49565	-2.37163	0.561474	0.761535	0.353684
	0.617568	-1.21353	Q4MS98	1211	SipW-cognate class signal peptide domain protein GN=AQ16_1211	14	14	14	46.2	46.2	46.2	21.574	0	34.353	98030000	30	425250	780610	0	9887500	19398000	14233000	659540	1128800	1913700	46113000	3490900	0	14	14	14	-7.90259	-8.35379	-6.46239	-1.75839	-1.73884	-0.0184483	-5.39948	-7.65858	-6.02012	-2.81314	-3.76906	-3.06002
	0.617253	-0.338645	Q4MN67	1883	Pyridoxal phosphate-dependent acyltransferase family protein GN=AQ16_1883	21	21	21	65.4	65.4	65.4	43.106	0	282.15	1374800000	217	38298000	111820000	65781000	105980000	132590000	36241000	72079000	122590000	167640000	316330000	54537000	150910000	21	21	21	-1.61672	-1.68639	-1.04349	1.32282	0.758057	0.745213	-0.925694	-1.38203	-1.02294	1.14808	1.2606	0.939133
	0.613782	-0.629664	Q4MTP2	3995	Phosphoenolpyruvate-protein phosphotransferase GN=ptsI	38	38	38	70.2	70.2	70.2	62.78	0	297.6	4592200000	361	339730000	768090000	476490000	0	657650	1711500	742520000	1569600000	672570000	19107000	1773200	0	38	38	38	1.3191	0.450358	1.50969	-4.18161	-7.22255	-4.85794	1.7455	2.27437	1.14828	-3.69786	-4.21059	-3.71621
	0.611792	0.210429	A0A0B5YR15	3431	50S ribosomal protein L20 GN=rplT	10	10	10	48.3	48.3	48.3	13.612	0	65.081	1375600000	93	139180000	395560000	147340000	0	0	0	96905000	356470000	240160000	0	0	0	10	10	10	-0.290114	-0.706272	-0.35743	-5.40043	-6.47877	-3.99188	-0.725687	-0.493712	-0.765705	-6.65686	-3.64594	-4.31603
	0.611478	-1.67247	Q4MQ20	2912	Uncharacterized protein GN=AQ16_2912	8	8	8	63	63	63	16.196	0	70.54	297180000	42	24761000	77140000	10545000	1440500	663130	655130	23609000	81012000	77097000	259140	0	0	8	8	8	-2.37958	-2.37305	-6.0335	-5.52578	-6.5169	-5.3246	-1.97317	-1.65618	-2.13937	-6.93696	-4.34429	-3.17828
	0.579038	0.330699	A0A0B5Z5D2	2392	50S ribosomal protein L23 GN=rplW	13	13	13	85.4	85.4	85.4	11.114	0	71.915	862260000	58	79802000	257180000	72799000	281650	324960	0	70461000	214520000	166880000	0	0	0	13	13	13	-0.449748	-0.526401	-0.724778	-6.52816	-5.4211	-5.93503	-1.281	-0.453158	-0.95886	-6.40963	-4.29594	-3.22397
	0.578773	1.7603	A0A0B5Z6L7	2685	UDP-N-acetylglucosamine 1-carboxyvinyltransferase GN=murA	8	8	8	32.4	32.4	32.4	45.851	0	60.325	410250000	29	23529000	89220000	50227000	81975000	77557000	47556000	6084500	0	29412000	4694700	0	0	8	8	8	-0.998942	-1.21897	-1.00449	-0.175789	-0.161408	0.907682	-1.13169	-5.50764	-1.86399	-5.10795	-4.30788	-3.64733
	0.574693	0.589858	Q4MKB1	4243	Polyribonucleotide nucleotidyltransferase GN=pnp	41	41	41	63.3	63.3	63.3	78.18	0	323.31	5363500000	486	643640000	1465100000	753170000	183070000	208340000	99306000	559310000	882030000	295530000	131860000	33693000	108440000	41	41	41	1.94098	1.81053	1.70187	1.06977	1.1673	1.32942	1.50667	1.83266	0.344485	0.142421	0.679157	1.68617
	0.573843	0.257865	A0A0B5ZG72	1825	Zinc-binding dehydrogenase family protein GN=AQ16_1825	16	16	16	50	50	50	37.82	0	185.78	667770000	89	10974000	23187000	6671300	30809000	29205000	14349000	1760100	12943000	5834200	270720000	47035000	214290000	16	16	16	-4.37486	-4.19265	-4.77999	-0.244705	-1.42564	-0.269883	-4.51399	-4.84435	-4.76275	1.31682	1.40855	2.56046
	0.573665	1.00666	Q4MHL9	ilvA	L-threonine dehydratase catabolic TdcB GN=ilvA	7	7	7	27.6	27.6	27.6	35.656	0	22.476	99188000	20	12758000	48518000	17058000	0	553130	0	3605800	4416500	12280000	0	0	0	7	7	7	-3.99139	-3.37108	-3.09817	-6.3184	-8.69889	-5.00801	-4.61386	-5.70197	-3.16478	-6.03005	-2.60662	-3.83877
	0.572922	-1.23377	A0A0B5ZCP3	4546	Collagenase family protein GN=AQ16_4546	76	74	74	74.5	72.4	72.4	109.98	0	323.31	4842800000	535	3462600	5789900	6618600	14275000	43207000	24533000	997010	21955000	14897000	3621500000	564370000	521180000	74	74	76	-7.32688	-7.16991	-7.00473	-3.92891	-2.85276	-0.598133	-4.05207	-6.60176	-7.14636	4.81205	5.15813	3.63223
	0.563939	-0.257526	Q4MN09;Q4MXU6	fsa	Probable transaldolase GN=fsa	17	17	17	87.9	87.9	87.9	23.068	0	279.54	1901400000	185	97800000	179010000	146780000	210150000	198400000	96059000	111810000	303830000	250780000	255480000	33242000	18080000	NaN	NaN	NaN	-0.287326	-0.963292	-0.47897	2.01918	1.6639	2.35514	-0.306371	-0.282135	-0.368502	0.71161	0.718739	-1.30354
	0.555977	-0.273625	Q4MSV9	946	Aminotransferase GN=AQ16_946	11	11	11	39.2	39.2	39.2	43.238	0	62.187	319470000	58	24496000	93778000	33127000	11309000	17936000	2972700	27835000	40999000	50937000	16081000	0	0	11	11	11	-2.92767	-2.82031	-2.37567	-2.04342	-1.88143	-2.24229	-2.45627	-2.66141	-2.1851	-2.68094	-4.30919	-4.96068
	0.554838	-0.362598	Q4MJY6	4347	Iron-containing alcohol dehydrogenase family protein GN=AQ16_4347	10	10	10	39.5	39.5	39.5	42.801	0	47.094	156600000	28	17716000	42708000	361220	2636600	6164900	2121600	10684000	25119000	38133000	10957000	0	0	10	10	10	-4.40994	-4.70234	-4.80544	-2.55224	-2.77257	-1.52097	-4.1154	-4.79311	-3.92143	-3.75786	-3.04984	-5.04615
	0.548424	-0.882162	Q4MUR7	665	UPF0176 protein AQ16_665 GN=AQ16_665	7	7	7	25.1	25.1	25.1	36.718	0	16.233	96591000	14	4493400	23944000	14037000	0	0	0	12866000	11876000	29375000	0	0	0	7	7	7	-5.66176	-4.29343	-3.56462	-5.56386	-7.92094	-4.67212	-2.91304	-4.05802	-3.90226	-4.91462	-3.62598	-5.1996
	0.542689	0.350226	A0A0B5Z9D2	2393	50S ribosomal protein L4 GN=rplD	12	12	12	55.6	55.6	55.6	22.53	0	212.55	6842500000	180	931320000	1914000000	791270000	3942200	2839200	1290000	522760000	1346300000	1265600000	25171000	8313800	29718000	12	12	12	2.87582	2.34089	2.14078	-4.44553	-5.43601	-4.63155	1.77066	2.13784	2.39831	-2.23983	-1.70426	-0.893777
	0.542252	0.19984	Q4MMY9	98	L-serine dehydratase, iron-sulfur-dependent, alpha subunit GN=sdaAA	11	11	11	36.6	36.6	36.6	29.915	0	44.959	390900000	64	47549000	84228000	49692000	8126800	5647700	4133000	31254000	56489000	55109000	36228000	6188600	6255700	11	11	11	-2.05426	-2.457	-2.22249	-1.86712	-3.07429	-1.91844	-2.55597	-2.5597	-2.2176	-1.75041	-1.04814	-2.64613
	0.53823	1.19147	Q4MI11	2481	Ribosomal RNA small subunit methyltransferase A GN=rsmA	3	3	3	13.4	13.4	13.4	32.768	0	7.6569	101900000	9	8344000	30517000	10486000	0	0	0	6657600	22942000	22955000	0	0	0	3	3	3	-3.83413	-3.39692	-4.41929	-5.79353	-6.15436	-5.52665	-5.08143	-6.68401	-3.45932	-7.78274	-3.82379	-4.16033
	0.538157	0.536126	Q4MSR6	987	GTPase Der GN=engA	13	13	13	35.3	35.3	35.3	48.618	0	35.788	351690000	35	41167000	127790000	53094000	0	0	0	21043000	50582000	55697000	2312900	0	0	13	13	13	-2.17943	-2.11284	-1.47461	-6.40386	-6.32852	-5.92622	-2.14917	-3.21023	-2.01586	-4.77168	-4.38683	-4.73287
	0.527528	-0.377227	A0A0B5Z1D7	thrS	Threonine--tRNA ligase GN=thrS	22	22	22	36.1	36.1	36.1	73.953	0	50.789	568540000	70	36129000	121290000	53247000	5260300	13855000	4561900	67389000	178370000	73942000	8462400	0	6030900	22	22	22	-2.00255	-1.80064	-1.89433	-1.67707	-2.78695	-2.02144	-1.34676	-1.09585	-2.12323	-3.70179	-2.76459	-3.69575
	0.52395	0.908788	Q4MRZ9	3627	tRNA-specific 2-thiouridylase MnmA GN=trmU	4	4	4	19.4	19.4	19.4	41.718	0	8.5612	73515000	9	8466900	35374000	11054000	0	0	0	2644900	0	15976000	0	0	0	4	4	4	-3.58003	-3.66993	-3.5278	-6.07326	-6.82665	-6.78595	-3.29388	-5.9089	-4.30135	-6.57699	-2.30402	-4.79931
	0.523031	-0.445186	Q4MGQ6	2641	Periplasmic binding family protein GN=AQ16_2641	6	6	6	26.9	26.9	26.9	35.379	0	25.316	98420000	29	4564000	13510000	8214500	4911700	7997300	1563100	6411600	10898000	27402000	12949000	0	0	6	6	6	-4.40836	-5.26541	-4.36595	-2.46269	-3.49093	-2.92054	-4.19979	-4.65404	-3.85034	-3.99204	-4.02714	-2.70151
	0.522148	0.742183	A0A0B5YZH3	3478	Electron transfer flavodomain protein GN=AQ16_3478	4	4	4	31.9	31.9	31.9	28.19	0	52.264	104010000	18	6836500	10185000	6189600	18616000	15098000	9611800	5527600	6969800	9644300	10113000	5222500	0	4	4	4	-5.302	-5.52058	-4.30443	-2.34585	-2.15407	-1.47833	-6.39319	-6.16753	-4.79285	-3.57101	-3.48714	-3.69532
	0.519323	0.204358	Q4MMC6	1275	Enoyl-[acyl-carrier-protein] reductase [NADH] GN=fabI	21	21	21	85.5	85.5	85.5	27.709	0	250.65	7500400000	230	927000000	1992400000	862380000	2388000	422890	1279900	720130000	1500700000	1485800000	3090700	696180	4143800	21	21	21	2.81538	2.41421	2.37403	-5.88292	-7.21376	-5.71515	2.13213	2.40448	2.45394	-6.86504	-3.71957	-5.0932
	0.518103	0.516223	A0A0B5YYA5	4210	50S ribosomal protein L19 GN=rplS	18	18	18	77.2	77.2	77.2	13.166	0	55.591	4409600000	126	603190000	1414700000	591510000	1004500	2066700	0	350620000	890430000	542860000	13235000	0	0	18	18	18	2.16562	2.09394	1.22103	-5.47506	-6.1395	-6.96172	0.772008	1.86249	1.29742	-3.2901	-3.45358	-4.05088
	0.517308	-0.159129	Q4MGD3	2379	50S ribosomal protein L6 GN=rplF	16	16	16	84.9	84.9	84.9	19.515	0	213.63	5678800000	205	571550000	1401700000	612210000	781180	1342100	0	649620000	1095400000	1341900000	4274400	0	0	16	16	16	1.82275	1.79095	1.69474	-7.0307	-6.95683	-4.90417	1.99242	1.67947	2.11393	-6.71816	-5.34549	-4.43712
	0.514085	-0.319289	Q4MGL7	2485	Transition state regulatory protein AbrB GN=abrB	3	3	3	33	33	33	10.49	0	231.02	141720000	21	10903000	31823000	12548000	0	0	0	13042000	50942000	22465000	0	0	0	3	3	3	-3.47404	-3.28979	-3.60417	-4.45709	-7.15729	-6.49846	-3.3571	-2.62506	-3.42797	-6.69631	-2.79839	-4.33861
	0.511252	1.17595	Q4MJ78	folD	Bifunctional protein FolD GN=folD	7	7	7	32.5	32.5	32.5	31.09	0	19.352	110240000	19	10910000	30895000	14609000	0	0	0	13256000	15244000	25326000	0	0	0	7	7	7	-3.68486	-3.90716	-3.66398	-6.0625	-6.10935	-6.39501	-2.93188	-6.12922	-5.72275	-7.82357	-3.08984	-3.38471
	0.510309	0.363891	Q4MS77	3551	ATP-dependent Clp protease ATP-binding subunit ClpX GN=clpX	19	19	19	51.3	51.3	51.3	46.197	0	190.58	1055200000	77	86968000	262450000	179360000	0	0	0	94591000	190390000	235670000	5539500	0	191550	19	19	19	-0.425472	-0.498931	0.359754	-5.11956	-5.64165	-5.27773	-0.430255	-0.847714	-0.378352	-3.98466	-3.87673	-4.20622
	0.50996	0.561623	Q4MGX6	ileS	Isoleucine--tRNA ligase GN=ileS	39	39	39	50.3	50.3	50.3	104.61	0	323.31	2136900000	257	270910000	698980000	248850000	29188000	44524000	9370500	238710000	363560000	145030000	87547000	256080	0	39	39	39	0.730663	0.643757	0.215021	-0.305231	-0.200992	-0.659158	0.475361	0.369642	-0.940431	-0.676872	-3.66603	-4.89287
	0.509096	0.400857	Q4MNQ6	3801	Aminomethyltransferase GN=gcvT	14	14	14	36.1	36.1	36.1	40.274	0	92.82	378710000	54	44906000	102810000	65047000	12142000	10579000	3990600	27988000	40456000	63150000	7523900	0	115340	14	14	14	-2.04613	-2.32933	-1.76088	-1.80924	-2.12166	-1.44139	-2.14048	-3.05286	-2.14556	-3.50597	-3.16793	-3.47731
	0.508652	1.3656	A0A0B5ZBF5	3614	Single-stranded-DNA-specific exonuclease RecJ GN=recJ	6	6	6	9.8	9.8	9.8	88.153	0	16.596	44651000	10	3214400	11642000	5224300	0	0	0	8801800	12852000	2917100	0	0	0	6	6	6	-4.56019	-4.95399	-4.33503	-5.88671	-6.45391	-5.63701	-4.724	-4.91949	-8.30251	-7.34252	-3.49634	-4.11964
	0.505159	-0.343774	Q4MI92	2414	Cysteine--tRNA ligase GN=cysS	10	10	10	26.9	26.9	26.9	53.921	0	31.396	226000000	27	15390000	50041000	24860000	1332300	0	371270	30013000	45362000	58631000	0	0	0	10	10	10	-2.80778	-3.12327	-2.52735	-4.89477	-7.065	-4.02894	-2.09726	-2.92874	-2.40108	-6.54718	-5.58738	-2.6885
	0.49884	-0.265529	Q4MGB5	1001	Glutamate dehydrogenase GN=gudB	20	20	20	53	53	53	47.536	0	113.89	1063400000	84	87367000	256240000	138120000	1674000	0	0	124030000	199020000	252980000	1552000	0	2377500	20	20	20	-0.657787	-0.647371	-0.23741	-4.06728	-4.87672	-4.05714	-0.186841	-0.598571	0.039432	-6.54838	-3.91872	-3.8557
	0.490928	0.232342	Q4MNX8	3734	RNA polymerase sigma factor SigA GN=sigA	11	11	11	36.8	36.8	36.8	43.241	0	58.34	203800000	31	20260000	70041000	34211000	0	0	395810	16737000	28757000	33401000	0	0	0	11	11	11	-3.08481	-2.70627	-2.67893	-6.15765	-6.76762	-6.773	-3.36494	-2.83482	-2.96727	-6.23581	-3.73511	-5.19051
	0.490867	-0.90676	Q4MNW0	3751	Superoxide dismutase GN=sodA1	4	4	4	41.9	41.9	41.9	22.664	0	294.86	1274800000	93	76399000	246900000	84128000	14871000	24118000	7476100	62315000	340930000	310570000	68631000	10867000	27584000	4	4	4	-0.749915	-0.633666	-2.32955	-2.33623	-1.84449	-2.68088	-1.51188	0.275042	0.243985	-0.940423	-2.64519	-4.0994
	0.48785	-0.0844533	Q4MIY2	2156	Aspartyl/glutamyl-tRNA(Asn/Gln) amidotransferase subunit B GN=gatB	15	15	15	34.9	34.9	34.9	53.237	0	49.682	352240000	54	24452000	72914000	32196000	1355900	0	0	52691000	99176000	68441000	1014100	0	0	15	15	15	-2.17587	-2.13698	-1.94783	-5.99535	-6.33696	-5.61845	-1.95435	-2.04707	-2.00589	-6.40934	-3.40304	-3.99485
	0.485954	0.635299	A0A0B5YYQ8	2938	Neutral protease B GN=nprB	24	24	24	41.5	41.5	41.5	60.36	0	323.31	2304800000	264	1234600	11540000	818670	47094000	62572000	36616000	2095100	9264200	3127500	1772900000	167910000	189630000	24	24	24	-4.6264	-4.94735	-5.78969	-1.22134	-0.79519	0.346827	-5.66377	-5.02603	-6.57953	4.1415	2.56764	-0.513829
	0.481201	0.649099	Q4MQ23	murB	UDP-N-acetylenolpyruvoylglucosamine reductase GN=murB	6	6	6	18.4	18.4	18.4	33.563	0	11.571	57509000	10	9023000	8801900	5222300	0	0	0	3916600	20320000	10225000	0	0	0	6	6	6	-4.26207	-5.11207	-4.33921	-5.47651	-5.94156	-4.77939	-6.21492	-4.46285	-4.98287	-8.29312	-3.87887	-5.40836
	0.477223	-0.378392	A0A0B5Z4F9	2705	Uracil phosphoribosyltransferase GN=upp	10	10	10	70.3	70.3	70.3	22.9	0	41.566	832830000	68	66481000	174310000	80480000	0	0	0	65947000	229980000	213690000	1938000	0	0	10	10	10	-0.9717	-0.878886	-1.60897	-6.41874	-5.17791	-5.65527	-1.18811	-0.305082	-0.831187	-4.44927	-3.79043	-3.4258
	0.470038	0.439048	Q4MGU7	argS	Arginine--tRNA ligase GN=argS	35	35	34	63.7	63.7	63.7	62.487	0	298.63	2202700000	220	213760000	597940000	273840000	31923000	52701000	10103000	285620000	515910000	217920000	2952100	0	0	34	35	35	0.706114	0.840915	0.542753	-0.26431	-0.425981	-1.11941	0.72085	0.580567	-0.528778	-3.86897	-2.47183	-3.43461
	0.468177	0.41481	A0A0B5Z855	2690	Peptide chain release factor 1 GN=prfA	14	14	14	45.1	45.1	45.1	40.414	0	132.31	828960000	56	72777000	317620000	116630000	0	0	0	65080000	100390000	156470000	0	0	0	14	14	14	-1.25541	-0.293697	-0.465619	-5.29893	-6.09431	-5.68599	-0.784235	-1.56871	-0.90621	-7.05793	-4.0983	-4.30337
	0.466985	0.208733	A0A0B5ZJ65	2406	50S ribosomal protein L1 GN=rplA	24	24	24	79.1	79.1	79.1	24.481	0	323.31	8225500000	250	1008000000	2054300000	1102500000	1655200	5172400	729020	875110000	1365500000	1801000000	4549200	2128400	4863800	24	24	24	2.95226	2.50274	2.66922	-6.47269	-5.81858	-6.54767	2.41017	2.31026	2.7776	-6.46757	-4.67187	-2.70498
	0.465975	0.819509	A0A0B5ZIJ9	2173	DNA helicase GN=pcrA	5	5	5	9.3	9.3	9.3	84.258	0	9.5966	80860000	10	9592700	17747000	11744000	0	0	0	2632100	28794000	10350000	0	0	0	5	5	5	-3.98065	-4.41816	-4.1487	-6.15645	-5.50232	-5.55061	-4.96883	-3.71991	-6.31731	-7.11524	-3.18437	-4.63279
	0.461657	-0.217854	Q4MM09	2832	Cell division protein FtsX GN=ftsX	6	6	6	20.5	20.5	20.5	33.167	0	11.743	55439000	17	6680700	14393000	6847200	0	0	0	1602900	12647000	13268000	0	0	0	6	6	6	-4.45803	-5.03693	-5.09295	-6.724	-6.16542	-4.8247	-4.68136	-4.61649	-4.63651	-4.8954	-3.43933	-3.34831
	0.458402	-1.09975	Q4MH62	74	Uncharacterized protein GN=AQ16_74	12	12	12	42.3	42.3	42.3	41.62	0	133.4	179940000	44	0	6048200	0	17868000	13114000	10963000	2635900	0	0	108010000	14256000	7043400	12	12	12	-5.84101	-7.22934	-5.85533	-1.35006	-2.41189	-0.924729	-4.7258	-3.89956	-7.00108	-0.683321	-0.0851121	-1.09207
	0.457607	0.993356	A0A0B5Z0C5	3980	Uncharacterized protein GN=AQ16_3980	5	5	5	27.4	27.4	27.4	31.496	0	13.078	104690000	18	9883900	29551000	11264000	0	0	0	2365100	27973000	23649000	0	0	0	5	5	5	-3.88603	-3.89056	-3.56634	-5.03494	-6.93004	-5.5418	-6.61963	-3.64411	-4.05926	-7.935	-2.59902	-5.26273
	0.457107	0.39471	Q4MGJ0	2688	50S ribosomal protein L31 type B GN=rpmE	4	4	4	65.4	65.4	65.4	9.1842	0	85.451	223710000	26	14548000	71340000	31454000	0	0	0	9602900	41953000	52878000	1930000	0	0	4	4	4	-3.03814	-2.87095	-2.16713	-5.42759	-7.25053	-4.85772	-3.60451	-2.86746	-2.78839	-6.69915	-3.4772	-3.45977
	0.456028	0.485413	Q4MGD6	2376	50S ribosomal protein L30 GN=rpmD	4	4	4	48.3	48.3	48.3	6.5557	0	12.283	107020000	13	5952600	26004000	16938000	280650	0	275320	8900500	22326000	26345000	0	0	0	4	4	4	-4.13893	-3.42437	-3.08388	-5.73169	-7.07231	-5.83503	-4.70733	-3.74924	-3.64685	-5.46207	-2.34381	-2.98453
	0.453165	0.472615	Q4MVN1	3305	UDP-N-acetylmuramate--L-alanine ligase GN=murC	14	14	14	35.1	35.1	35.1	49.256	0	47.885	342010000	39	33747000	148560000	50950000	0	0	0	12327000	40031000	56389000	0	0	0	14	14	14	-2.31604	-1.36105	-2.2636	-4.90508	-7.24399	-5.92605	-2.99591	-2.49165	-1.87098	-6.05265	-4.29284	-3.52601
	0.445774	-0.604368	Q4MRF7	512	DNA protection during starvation protein 1 GN=dps1	8	8	8	61.2	61.2	61.2	16.65	0	73.81	260690000	82	0	194600	0	7672800	9836800	5132200	3507700	0	4849800	149630000	53899000	25972000	8	8	8	-5.43597	-6.35632	-6.46913	-2.37312	-2.82401	-1.66941	-5.16745	-4.85107	-6.4298	0.360329	0.239616	-2.31523
	0.445755	-0.333145	Q4MY56	4572	Glycerophosphoryl diester phosphodiesterase family protein GN=AQ16_4572	31	31	31	82.5	82.5	82.5	35.925	0	323.31	6469200000	485	482300000	1298800000	604500000	279280000	289280000	71655000	1146100000	936290000	1235700000	91026000	993140	33237000	31	31	31	1.57439	1.73849	1.77463	2.21981	1.89133	0.893038	2.61189	1.52925	1.9458	-1.02799	-4.13526	-1.6984
	0.440376	-0.754273	Q4MXJ1	4789	Uncharacterized protein GN=AQ16_4789	6	6	6	19.7	19.7	19.7	40.429	0	18.042	37799000	13	1994300	1169300	876560	1966500	2060000	1151000	0	0	3919600	13077000	0	11585000	6	6	6	-7.14049	-5.37463	-5.69993	-4.75156	-4.92566	-4.2067	-5.32758	-6.17091	-4.45373	-3.20886	-3.09779	-3.66926
	0.435514	-0.452772	A0A0B5Z0H0	gap	Glyceraldehyde-3-phosphate dehydrogenase GN=gap	27	27	27	78.1	78.1	78.1	35.825	0	323.31	9540200000	321	690580000	1682000000	866660000	1002600	2286900	861500	1250500000	1940300000	3088200000	17273000	388470	114000	27	27	27	2.41327	2.3042	2.32185	-4.14698	-5.92345	-5.41519	2.05444	2.75245	3.59075	-3.85785	-3.2894	-3.86985
	0.43433	-0.390758	Q4MIF1	2681	CTP synthase GN=pyrG	28	28	28	64.1	64.1	64.1	59.752	0	323.31	4477700000	276	406780000	1015500000	594840000	151140000	127900000	48835000	579570000	1088100000	436410000	25518000	1727400	1354200	28	28	28	1.34933	1.11062	1.77195	1.33462	0.999589	0.945386	2.09428	2.17345	1.13644	-1.94897	-3.41588	-3.40298
	0.423047	0.130762	A0A0B5Z9I6	2401	DNA-directed RNA polymerase subunit beta GN=rpoC	93	93	93	83	83	83	134.39	0	323.31	9490200000	772	960070000	2450400000	1198600000	60302000	94287000	24843000	777260000	2130600000	1637000000	134280000	12675000	9912300	93	93	93	2.60742	2.57293	2.50749	0.538312	0.525452	0.591713	2.21235	2.65762	2.42558	0.105677	-0.716383	-1.14931
	0.422212	-0.514305	Q4MP88	5203	NLP/P60 family protein GN=AQ16_5203	11	11	11	33	33	33	37.3	0	169.78	231250000	46	0	0	0	7110100	1594900	8237400	0	0	0	146560000	36754000	30993000	11	11	11	-6.37274	-5.64476	-5.53408	-3.21781	-7.94783	-2.53504	-5.35072	-4.55306	-6.1049	0.322192	-1.04077	-2.37776
	0.417762	-0.683497	A0A0B5Z524	2510	Sigma-70, region 4 family protein GN=AQ16_2510	3	3	3	28.5	28.5	28.5	14.329	0	6.0299	49937000	5	5215600	2573400	7173000	298580	0	0	5832800	19520000	9323900	0	0	0	3	3	3	-4.62091	-6.45794	-4.24268	-5.13805	-8.25059	-4.9413	-4.68282	-4.3376	-4.25061	-6.18795	-3.79235	-2.87411
	0.410674	-0.16806	Q4ML70	aroA	3-phosphoshikimate 1-carboxyvinyltransferase AroA GN=aroA	9	9	9	31	31	31	39.998	0	114.07	407290000	49	33246000	80120000	43573000	7649500	17969000	3990100	23078000	70170000	97706000	28608000	1179400	0	9	9	9	-2.57384	-2.73444	-2.30283	-2.05161	-1.76349	-1.32475	-2.34886	-2.58587	-2.1722	-2.59964	-3.50986	-4.87192
	0.406288	-0.362522	A0A0B5ZCV9	3641	Peptidase U32 family protein GN=AQ16_3641	8	8	8	26.2	26.2	26.2	35.555	0	14.521	86644000	12	2646800	19600000	7379300	0	0	0	10391000	19968000	26540000	0	0	118910	8	8	8	-4.92035	-4.06383	-3.65874	-6.1568	-6.06524	-4.92624	-3.92612	-3.91806	-3.71118	-5.83183	-4.98515	-3.41174
	0.404308	0.355757	Q4MI90	2412	RNA 2-O ribose methyltransferase substrate binding family protein GN=AQ16_2412	3	3	3	15	15	15	27.007	0	8.4763	60497000	11	5052200	10686000	6540600	0	0	0	3116700	7870400	27231000	0	0	0	3	3	3	-4.24574	-4.45553	-4.18795	-5.70996	-6.1853	-4.53792	-5.35855	-4.4515	-4.14644	-6.09714	-2.94322	-4.46574
	0.400928	-0.349584	Q4MP00	3716	Ribosomal protein L11 methyltransferase GN=prmA	11	11	11	59.3	59.3	59.3	33.756	0	82.753	342400000	39	36309000	147390000	18090000	0	0	0	25368000	57398000	57839000	0	0	0	11	11	11	-2.56234	-1.77637	-2.95115	-4.98122	-5.23127	-5.88394	-2.20168	-1.82073	-2.2187	-5.54996	-3.89751	-3.08983
	0.400847	-0.282765	Q4MS07	hisS	Histidine--tRNA ligase GN=hisS	12	12	12	36.2	36.2	36.2	47.78	0	54.914	460070000	38	37656000	135850000	59857000	4025900	6665200	2140600	58275000	63973000	88809000	1864400	958760	0	12	12	12	-2.12571	-1.69993	-1.61539	-6.76934	-3.47061	-6.29654	-1.44045	-2.00813	-1.14416	-4.01238	-1.9384	-4.10582
	0.399035	-0.319312	A0A0B5ZDF4	3479	Electron transfer flavodomain protein GN=AQ16_3479	8	8	8	26.8	26.8	26.8	34.369	0	24.995	60283000	19	0	0	0	12419000	12644000	6989100	0	2219900	5105500	20647000	257560	0	8	8	8	-5.37003	-5.4443	-5.64878	-1.80255	-2.39945	-1.24274	-4.75907	-5.81729	-4.92882	-3.01458	-3.54373	-3.93048
	0.397647	-0.418194	Q4MQ54	2880	2,3-bisphosphoglycerate-independent phosphoglycerate mutase GN=gpmI	22	22	22	53.4	53.4	53.4	56.352	0	235.7	2513100000	231	146760000	312940000	271380000	59512000	64346000	27878000	385960000	577090000	346340000	194850000	51193000	74827000	22	22	22	-0.00575284	-0.417096	0.480268	0.785313	-0.062085	0.999801	0.995617	0.555386	-0.239002	0.425166	1.61347	0.122845
	0.397509	-0.283647	A0A0B5ZE15	4144	Cell division protein FtsZ GN=ftsZ	13	13	13	50.5	50.5	50.5	40.731	0	153.84	761300000	80	59909000	158750000	112520000	0	0	0	106610000	110930000	212580000	0	0	0	13	13	13	-1.25906	-1.34368	-0.810844	-6.03645	-7.7411	-5.18723	-0.618505	-1.35865	-0.585483	-6.37754	-3.35603	-4.38291
	0.39679	-0.283497	A0A0B5Z1C4	1798	Quinol oxidase subunit 2 GN=qoxA	8	8	8	40.9	40.9	40.9	33.336	0	42.926	304660000	29	27712000	68091000	24764000	1493400	1675600	0	17573000	79660000	68737000	8608300	1291700	5048800	8	8	8	-2.05535	-2.58065	-3.02912	-5.32343	-5.9809	-5.76733	-2.48693	-2.12743	-2.20027	-3.48537	-3.76846	-4.36975
	0.394532	0.573473	A0A0B5Z970	3484	Succinate dehydrogenase/fumarate reductase, flavoprotein subunit GN=sdhA	15	15	15	32.2	32.2	32.2	66.035	0	42.385	150690000	36	15154000	26900000	12838000	7161800	5118000	959720	5301300	33434000	4271200	34826000	3901600	822610	15	15	15	-3.41261	-4.0707	-3.50414	-2.41936	-4.30698	-4.43217	-5.38998	-3.58879	-3.7291	-1.84124	-2.94846	-3.90389
	0.391983	0.716035	Q4MXI6	4794	N-acetylmuramoyl-L-alanine amidase family protein GN=AQ16_4794	8	8	8	15.2	15.2	15.2	65.852	0	20	71529000	16	6038200	19872000	10207000	1735500	0	980940	7501400	20735000	4458000	0	0	0	8	8	8	-4.25756	-4.48771	-4.03179	-3.99036	-4.60324	-6.14124	-4.32392	-4.11207	-6.48918	-6.87492	-2.85247	-2.73044
	0.389797	0.375483	Q4MTD4	4104	Pyruvate carboxylase GN=pyc	29	29	29	30.8	30.8	30.8	128.5	0	75.838	424210000	92	48590000	117190000	48369000	22295000	28022000	9022300	43957000	69323000	29240000	2362400	3762400	2082500	29	29	29	-1.75214	-2.54638	-2.13673	-1.25747	-1.27076	-0.444483	-2.15607	-2.21546	-3.19017	-7.28452	-4.1176	-4.054
	0.386288	0.276643	Q4MH32	2361	50S ribosomal protein L13 GN=rplM	12	12	12	77.9	77.9	77.9	16.428	0	91.779	2506500000	107	232490000	751480000	311890000	826550	874720	0	179780000	561570000	457540000	10042000	0	0	12	12	12	0.721627	1.17271	0.455866	-5.31622	-7.38388	-5.96637	0.0736612	0.752217	0.694395	-3.25984	-2.77211	-3.5143
	0.384008	0.55658	Q4MPW1	2276	Bacterial extracellular solute-binding s, 5 Middle family protein GN=AQ16_2276	8	8	8	23.5	23.5	23.5	63.744	0	37.964	67933000	20	1919600	2797400	6831500	15584000	21089000	6001800	1124000	11724000	0	861720	0	0	8	8	8	-5.57228	-5.79846	-3.88732	-1.9512	-1.82779	-1.96328	-5.48355	-5.80111	-5.64314	-7.01767	-3.48953	-4.07171
	0.383358	-0.221022	A0A0B5YWA6	4223	30S ribosomal protein S2 GN=rpsB	23	23	23	81.1	81.1	81.1	26.563	0	323.31	6073700000	295	778500000	1852100000	584440000	1290600	2856200	839340	500890000	1124800000	1216000000	10943000	1035300	0	23	23	23	2.12042	1.89349	1.45505	-5.14957	-5.39777	-6.27915	1.82518	2.31505	1.99179	-4.37885	-3.58632	-2.84132
	0.38228	0.178828	A0A0B5ZAI7	2395	30S ribosomal protein S10 GN=rpsJ	12	12	12	73.5	73.5	73.5	11.684	0	235.55	4140300000	158	396330000	1112900000	565820000	11712000	12351000	9822100	337460000	824790000	841130000	18808000	2050400	7055700	12	12	12	1.68445	1.55998	1.56944	-2.71178	-2.86342	-2.27614	1.11292	1.38769	1.77677	-3.1476	-4.05134	-4.25358
	0.381397	0.378494	A0A0B5Z363	3747	4-hydroxy-3-methylbut-2-en-1-yl diphosphate synthase (flavodoxin) GN=ispG	15	15	15	50.3	50.3	50.3	40.027	0	43.477	1624300000	51	155740000	386840000	339800000	5407200	1698400	347330	239640000	217850000	275170000	1788400	0	0	15	15	15	0.262351	-0.173927	0.996587	-0.696623	-2.57027	-4.42598	0.123811	-0.483679	0.309397	-5.72764	-2.84091	-4.53055
	0.372814	0.297458	A0A0B5YRL2	2390	30S ribosomal protein S19 GN=rpsS	11	11	11	73.9	73.9	73.9	10.627	0	223.3	599080000	68	24572000	182240000	71281000	0	0	0	55835000	88337000	176460000	0	234530	125460	11	11	11	-1.882	-1.56354	-1.19513	-6.0044	-5.57003	-5.58365	-2.01083	-2.20414	-1.31807	-7.20939	-4.1769	-2.88547
	0.368395	0.263308	Q4MU98	828	Flagellin GN=AQ16_828	29	12	12	86.7	35.7	35.7	30.91	0	323.31	1013600000	139	27843000	73068000	20448000	56461000	96075000	188530000	18109000	22090000	31383000	343420000	105790000	30377000	12	12	29	-2.58167	-2.53781	-3.19516	-0.775736	0.428162	2.59716	-2.73429	-3.44061	-2.92966	0.887661	3.20414	-0.574619
	0.360375	-0.164172	A0A0B5ZDF0	2512	Serine--tRNA ligase GN=serS	17	17	17	44.8	44.8	44.8	48.73	0	151.88	1009700000	104	66222000	298780000	132540000	0	0	0	74332000	191100000	229930000	908220	886650	14964000	17	17	17	-0.991481	-0.6184	-0.461719	-5.11164	-6.7888	-4.80097	-0.512742	-0.717614	-0.34873	-6.08549	-4.07369	-3.786
	0.355281	0.193596	Q4MPZ6	proC	Pyrroline-5-carboxylate reductase GN=proC	4	4	4	16.1	16.1	16.1	29.141	0	8.8215	38663000	15	3233500	8330900	5054500	692800	856660	211840	756290	5713600	13813000	0	0	0	4	4	4	-4.90401	-5.03464	-4.70685	-5.09059	-5.38356	-6.30216	-5.23372	-4.66737	-5.3252	-8.44017	-2.51467	-4.17256
	0.35304	0.467213	Q4MRZ1	3635	Alanine--tRNA ligase GN=alaS	24	24	24	34.9	34.9	34.9	97.488	0	137.61	781160000	116	112500000	242810000	110000000	5977400	10151000	4115500	96416000	155170000	40932000	3084200	0	0	24	24	24	-0.641249	-0.918711	-1.04836	-2.54194	-2.17298	-1.90267	-0.537901	-1.1146	-2.35746	-6.59914	-3.18765	-3.34592
	0.351781	0.243822	Q4MIM4	3884	Dihydrolipoamide acetyltransferase component of pyruvate dehydrogenase complex GN=AQ16_3884	8	8	8	25.5	25.5	25.5	47.367	0	42.645	302560000	32	27145000	81876000	59937000	4158900	3359200	844840	23345000	40142000	45832000	15917000	0	0	8	8	8	-2.37135	-2.43092	-1.81452	-5.10635	-8.66613	-3.13286	-2.24097	-2.23646	-2.87082	-3.19199	-4.31317	-4.31155
	0.345533	0.708361	Q4MMA1	pepF	Oligoendopeptidase F GN=pepF	19	19	19	36.3	36.3	36.3	70.277	0	178.05	612160000	98	21189000	37749000	37144000	36827000	47406000	15435000	19954000	110260000	4410500	198850000	26917000	56009000	19	19	19	-2.02077	-2.68292	-1.86407	-0.350392	-0.85718	-0.770716	-2.30172	-1.88784	-4.50328	0.736705	0.117531	-0.33953
	0.342664	-0.301566	Q4MIE5	2675	Acetyl-CoA C-acyltransferase family protein GN=AQ16_2675	11	11	11	40.2	40.2	40.2	41.138	0	35.731	211120000	48	0	3982300	0	35019000	59589000	19014000	0	0	0	68316000	6534300	18667000	11	11	11	-5.00172	-5.40251	-5.54712	-0.131883	-0.217627	-1.20188	-5.1555	-5.49655	-4.39459	-0.703777	-3.47076	-1.43188
	0.342249	-0.241275	A0A0B5YXU3	2858	Thioredoxin reductase GN=trxB	14	14	13	43.4	43.4	41.2	34.669	0	77.577	1023200000	88	101470000	178830000	132130000	7847800	8838700	231300	146660000	175630000	269830000	1750600	0	0	13	14	14	-0.369403	-0.927155	-0.381529	-2.13598	-2.67495	-4.511	-0.380484	-0.675414	0.101636	-5.54895	-3.15457	-3.53393
	0.341059	0.361259	Q4MH01	4198	Malonyl CoA-acyl carrier protein transacylase GN=fabD	8	8	8	38.9	38.9	38.9	33.615	0	69.949	188180000	32	25146000	44851000	15521000	0	0	0	17884000	41836000	42945000	0	0	0	8	8	8	-2.20524	-2.67155	-3.42182	-5.40452	-5.70288	-5.27912	-2.85268	-3.64242	-2.88729	-7.14462	-3.32934	-4.2445
	0.339417	0.893597	Q4MQ48	2886	Carboxylesterase GN=est	7	7	7	40.2	40.2	40.2	28.124	0	47.89	267860000	33	27738000	61872000	11691000	0	12264000	688340	20438000	61126000	69842000	2203100	0	0	7	7	7	-2.63837	-2.54836	-3.28807	-6.01524	-3.53036	-5.06697	-5.8358	-2.49241	-2.82738	-4.3719	-3.41755	-4.61377
	0.337983	0.228842	Q4MVE9	3227	S-adenosylmethionine synthase GN=metK	18	18	18	51.1	51.1	51.1	43.281	0	66.524	1375500000	83	128540000	411330000	227220000	0	1199700	0	125150000	188710000	285570000	7775700	0	0	18	18	18	0.00269932	-0.134373	0.29509	-5.28944	-6.09486	-5.39475	-0.416614	-0.430851	0.324356	-3.07602	-2.85685	-4.64958
	0.33246	0.639451	A0A0B5ZDR3	2474	Putative septation protein SpoVG GN=spoVG	4	4	4	50.5	50.5	50.5	10.934	0	7.9661	25598000	9	0	492290	0	8575100	11036000	4569900	0	0	0	924760	0	0	4	4	4	-6.13039	-4.73809	-5.37574	-2.12622	-2.9041	-2.14076	-4.71382	-6.49635	-6.95242	-6.00328	-5.09828	-5.13167
	0.330822	-0.127147	Q4MU36	230	Bacterial regulatory, arsR family protein GN=AQ16_230	3	3	3	26.3	26.3	26.3	11.357	0	4.9012	37337000	8	501870	7618500	3267900	838880	0	0	7165700	11590000	6353600	0	0	0	3	3	3	-4.93975	-5.42465	-5.33472	-4.80566	-5.85566	-5.51252	-5.15198	-4.99895	-5.16674	-5.20963	-3.83018	-4.30023
	0.32571	0.121847	Q4MR60	3007	Lipoyl synthase GN=lipA	19	19	19	60.1	60.1	60.1	33.701	0	56.685	579360000	70	63265000	141170000	69228000	3078800	3173600	298060	66603000	103530000	109390000	19621000	0	0	19	19	19	-1.38768	-1.43506	-1.12864	-3.60894	-3.97525	-4.78763	-1.19965	-1.5858	-1.53147	-3.23721	-4.48905	-4.27769
	0.318188	0.448037	Q4MNH3	4452	Aconitate hydratase GN=acnA	31	31	31	39	39	39	98.995	0	235.44	1375100000	230	123940000	265460000	95898000	56344000	100320000	8816800	132340000	235930000	51590000	81019000	5694800	217730000	31	31	31	-0.129223	-0.637232	-0.648229	0.652131	0.373923	-0.869481	-0.0907593	-0.705738	-1.9623	-0.543123	-1.19815	1.85654
	0.31017	-0.335024	Q4MVE8	3226	Phosphoenolpyruvate carboxykinase [ATP] GN=pckA	31	31	31	50	50	50	57.94	0	323.31	2159900000	361	19669000	44698000	27846000	371860000	506100000	182180000	28091000	64324000	34157000	509500000	140420000	231060000	31	31	31	-2.9111	-3.67088	-2.56429	2.52042	2.70657	2.67098	-2.36257	-2.47682	-3.3018	2.01989	2.83941	2.6291
	0.306437	-0.28269	Q4MGD0	2382	50S ribosomal protein L5 GN=rplE	21	21	21	83.2	83.2	83.2	20.165	0	222.04	48865000000	226	4688200000	6368300000	4915000000	6901200000	3228300000	1384800000	5032900000	5568400000	5685600000	4877000000	208750000	6459700	21	21	21	5.03933	4.40779	5.16117	5.06534	5.4551	6.13551	4.9268	4.79342	5.73614	5.43215	4.45485	1.4138
	0.298702	0.297878	Q4MJZ1	4342	Chitinase A GN=AQ16_4342	19	19	19	52.5	52.5	52.5	39.33	0	323.31	944850000	115	0	3478700	1517900	7124600	10992000	2598700	0	0	4758400	638030000	140630000	135720000	19	19	19	-5.06483	-4.82646	-4.71174	-3.44734	-3.20877	-4.5143	-5.06751	-5.88694	-4.54222	2.5648	2.87274	0.403262
	0.292624	-0.266265	A0A0B5ZET2	3441	Phenylalanine--tRNA ligase alpha subunit GN=pheS	5	5	5	17.2	17.2	17.2	38.945	0	11.696	74442000	15	9240500	26159000	2052900	0	0	0	5363600	6757900	24868000	0	0	0	5	5	5	-4.18023	-4.05942	-5.00599	-4.93971	-7.08437	-4.34176	-4.09921	-4.54769	-3.79995	-7.16647	-2.7878	-2.86735
	0.29162	0.138278	A0A0B5ZG08	1411	Uroporphyrinogen decarboxylase GN=hemE	3	3	3	10.6	10.6	10.6	39.314	0	17.907	213480000	26	25302000	56559000	33952000	8224400	11418000	1474500	15130000	25544000	23317000	12564000	0	0	3	3	3	-2.84132	-3.09217	-2.61009	-2.44807	-2.89644	-4.68632	-2.94666	-3.232	-2.77976	-2.92759	-3.73521	-3.20134
	0.28819	0.376997	Q4MJI3	lytR	Transcriptional regulator LytR GN=lytR	4	4	4	18.5	18.5	18.5	33.859	0	7.7359	23973000	8	4179900	13253000	3824700	0	0	0	1193500	0	1197200	324930	0	0	4	4	4	-4.31978	-5.69164	-5.17816	-5.52969	-8.38005	-6.61538	-5.51326	-5.99807	-4.80924	-7.02919	-4.12396	-3.19667
	0.285561	-0.263384	A0A0B5Z697	5636	Uncharacterized protein GN=AQ16_5636	17	17	17	52.2	52.2	52.2	43.666	0	69.742	525420000	79	36867000	126210000	66424000	7888200	15087000	4349900	64802000	76401000	106040000	10808000	1601100	8935200	17	17	17	-2.54992	-1.50796	-1.77672	-2.06041	-2.23348	-1.93864	-1.32561	-2.02616	-1.69268	-2.62474	-4.28022	-1.87571
	0.278867	-0.316736	Q4MRB2	pepA	Probable cytosol aminopeptidase GN=pepA	18	18	18	44.3	44.3	44.3	53.604	0	123.16	792490000	186	16924000	35896000	47018000	114590000	126600000	55081000	35133000	35622000	26280000	188480000	42280000	68581000	18	18	18	-2.95042	-3.31631	-2.52928	0.7154	0.564607	1.18641	-1.86977	-2.75584	-3.22019	0.129294	-0.191228	-0.337535
	0.278209	0.470641	Q4MVH8	3254	Leucine--tRNA ligase GN=leuS	29	29	29	48	48	48	91.326	0	205.91	1283300000	139	133480000	305830000	110260000	21476000	30200000	7953300	191940000	360820000	116830000	4519100	0	0	29	29	29	-0.0475932	-0.599281	-0.40048	-0.586472	-0.346752	-1.05153	0.180963	-0.572929	-2.06731	-4.43777	-4.26677	-4.47109
	0.277549	0.15057	A0A0B5Z8L4	glpX	Fructose-1,6-bisphosphatase GN=glpX	14	14	14	53	53	53	33.957	0	86.85	1430500000	57	180400000	419160000	235620000	1922800	7925000	240110	47655000	305610000	222530000	1424400	0	7970600	14	14	14	0.359996	0.285765	-0.321369	-5.34339	-1.89294	-4.79468	0.0190762	-0.0781186	-0.068277	-6.32361	-3.6909	-3.92725
	0.275333	-0.235416	Q4MH26	2367	DNA-directed RNA polymerase subunit alpha GN=rpoA	19	19	19	46.5	46.5	46.5	34.935	0	276.61	3546500000	231	265650000	858490000	510190000	47665000	47757000	19831000	386800000	532220000	772380000	67398000	12669000	25443000	19	19	19	0.824043	1.02514	0.368872	0.0497213	-0.17747	-0.0171613	0.650846	0.734635	1.53882	-0.817582	-0.138266	-0.580922
	0.270651	0.447818	Q4MWJ1	1619	Bacterial extracellular solute-binding s, 3 family protein GN=AQ16_1619	7	7	7	29.8	29.8	29.8	29.181	0	40.078	110280000	21	16079000	35773000	8436800	583370	0	0	1509100	20368000	13134000	14397000	0	0	7	7	7	-3.37224	-3.58128	-4.03076	-5.57723	-6.66899	-6.54072	-5.36203	-3.31858	-3.64712	-3.31508	-2.96365	-3.01789
	0.269489	0.316921	Q4MGT1	2651	Agmatinase GN=speB	8	8	8	40	40	40	32.389	0	66.562	260830000	54	23413000	65532000	31940000	2419700	6680000	0	21045000	41379000	29675000	37273000	0	1473800	8	8	8	-2.64778	-2.55052	-3.14625	-2.9033	-3.43333	-6.05344	-3.78207	-2.29614	-3.2171	-2.68574	-3.3854	-3.21223
	0.268343	0.633883	Q4MWF5	1583	S-layer protein GN=ctc	60	60	59	64.5	64.5	63.7	91.697	0	323.31	1815700000	372	1450400	1703500	1465500	413160000	618050000	328650000	2550200	6800600	10636000	269760000	49787000	111690000	59	60	60	-4.32032	-4.99294	-3.33536	2.81306	3.18585	3.85027	-5.39892	-5.90151	-3.24984	0.62649	0.0790028	0.366239
	0.262832	0.150802	A0A0B5ZDE7	glyA	Serine hydroxymethyltransferase GN=glyA	20	20	20	56.2	56.2	56.2	45.164	0	100.29	772670000	94	54766000	179970000	84729000	24551000	26697000	10529000	77079000	137460000	171620000	3949700	1235800	90981	20	20	20	-1.37824	-0.950927	-0.855426	-0.714782	-1.1017	-0.902607	-1.02292	-1.53668	-1.0774	-3.43225	-4.58632	-4.06455
	0.256474	-0.184056	A0A0B5Z947	2396	Elongation factor Tu GN=tuf	32	32	32	93.7	93.7	93.7	42.938	0	323.31	41551000000	967	3029000000	11905000000	4070900000	30150000	44318000	17772000	4247600000	7516500000	9697500000	518860000	65185000	408660000	32	32	32	4.32343	4.9382	4.34593	-0.505524	-0.510991	-0.169586	4.48622	4.55085	5.12266	1.9096	2.20716	3.73516
	0.25465	0.460495	Q4MMK5	4283	Acceptor oxidoreductase, beta subunit, pyruvate/2-ketoisovalerate family protein GN=AQ16_4283	6	6	6	28.1	28.1	28.1	31.365	0	34.872	152410000	21	13592000	24312000	13460000	14128000	18239000	3373800	18057000	33726000	12370000	1153300	0	0	6	6	6	-2.70548	-3.41115	-3.45613	-2.0691	-2.49563	-2.26426	-3.13116	-2.83097	-4.99211	-7.81574	-2.30139	-4.87723
	0.252777	-0.825757	A0A0B5ZB79	gap	Glyceraldehyde-3-phosphate dehydrogenase GN=gap	10	10	10	37.7	37.7	37.7	37.566	0	24.774	79540000	19	14724000	2158900	18902000	12111000	10300000	2384500	841000	2420000	0	15698000	0	0	10	10	10	-4.8724	-7.11501	-6.08372	-1.90478	-3.15774	-1.8873	-6.0449	-2.97355	-6.5754	-3.86795	-3.54379	-3.86957
	0.251347	-0.206968	Q4MI23	2469	Transcription-repair-coupling factor GN=mfd	5	5	5	5.5	5.5	5.5	134.19	0	9.9633	16414000	6	2835200	10326000	2593900	0	0	0	0	659850	0	0	0	0	5	5	5	-5.67352	-5.49853	-5.64453	-7.9058	-6.03052	-4.91809	-4.79842	-5.9009	-5.49635	-6.54627	-4.68073	-2.582
	0.247787	-0.239869	A0A0B5ZBP4	1822	Sphingomyelin phosphodiesterase GN=sph	10	10	10	46.8	46.8	46.8	36.946	0	78.499	126170000	47	5642900	29112000	3467400	28743000	33398000	18589000	2246400	0	2475700	2496400	0	0	10	10	10	-4.76794	-4.50678	-5.58603	-0.898683	-1.18433	-1.63287	-4.31963	-4.82806	-4.99346	-4.07587	-3.99139	-5.08834
	0.24628	0.232972	Q4MN53	1870	Alpha,alpha-phosphotrehalase GN=treC	27	27	27	51	51	51	65.622	0	209.4	1477200000	216	142760000	324560000	159340000	84109000	99360000	36739000	108550000	281100000	114160000	58167000	1716800	66599000	27	27	27	-0.470704	-0.815178	-0.359292	0.531523	0.387331	0.488233	-0.573034	-0.310387	-1.46067	-0.79511	-4.36606	1.60547
	0.246068	-0.201391	Q4MR71	glpX	Fructose-1,6-bisphosphatase GN=glpX	7	7	7	21.7	21.7	21.7	34.622	0	17.818	178790000	25	7084000	43991000	27671000	0	0	0	24653000	21143000	53595000	0	0	653820	7	7	7	-3.4524	-3.35302	-2.93825	-6.67506	-6.15847	-4.64553	-2.90939	-3.59014	-2.63996	-7.32887	-3.55934	-4.51801
	0.244372	-0.368356	Q4MVT4	3354	Glyoxalase/Bleomycin resistance /Dioxygenase superfamily protein GN=AQ16_3354	7	7	7	74.8	74.8	74.8	15.806	0	37.041	224850000	32	4045000	6484300	5857600	24824000	28101000	12887000	3688900	37333000	13939000	66385000	810750	20489000	7	7	7	-4.96981	-4.06532	-3.38236	-0.858523	-1.0666	-0.327521	-4.50852	-3.25518	-3.54872	-1.44854	-2.94685	-1.06258
	0.238399	-0.3207	Q4MN45	1863	Subtilase family protein GN=AQ16_1863	13	13	13	10.5	10.5	10.5	153.51	0	35.99	102460000	21	1791900	7699300	6771900	23837000	33008000	2377200	0	0	1217800	23309000	2443600	0	13	13	13	-5.58406	-4.32742	-5.46135	-1.77649	-1.76665	-1.29115	-4.96667	-4.13737	-5.30668	-3.54546	-0.515295	-4.47682
	0.234721	0.537548	Q4MU22	242	2-methylcitrate dehydratase GN=prpD	31	31	31	66.7	66.7	66.7	53.449	0	173.73	647190000	186	0	3164300	0	52270000	77051000	28927000	0	3008100	0	420220000	30022000	32533000	31	31	31	-6.62267	-4.11656	-5.16664	0.0933994	-0.334961	0.500865	-5.06721	-6.85701	-5.59429	1.45942	1.04943	-0.0638421
	0.232854	0.262607	A0A0B5Z632	3442	Phenylalanine--tRNA ligase beta subunit GN=pheT	25	25	25	43.2	43.2	43.2	88.48	0	169.89	547190000	75	61743000	197540000	65108000	0	0	2298100	55489000	116950000	44401000	3662600	0	0	25	25	25	-1.1401	-1.1289	-1.45877	-5.53897	-7.18404	-5.61609	-0.946266	-1.22018	-2.34914	-6.13966	-4.98772	-3.58875
	0.232538	-0.612575	Q4MU23	241	2-methylisocitrate lyase GN=prpB	8	8	8	42.1	42.1	42.1	32.962	0	52.003	42774000	13	0	0	0	3433900	3851800	1474500	0	0	1608600	31963000	441880	0	8	8	8	-4.89784	-7.267	-5.6256	-3.55871	-4.01661	-3.43918	-3.81895	-6.29048	-5.84327	-2.32223	-2.3965	-3.17679
	0.229187	0.280691	Q4MJU8	tkt	Transketolase GN=tkt	35	35	35	70	70	70	72.443	0	323.31	4807600000	323	555530000	1082000000	610990000	43599000	76989000	23549000	577900000	1343400000	419930000	55975000	1415000	16288000	35	35	35	2.00261	1.58075	1.79558	0.146818	0.180426	0.463668	1.6744	2.2227	0.639769	-1.39721	-3.27433	-0.874712
	0.224385	0.0916446	A0A0B5ZCJ0	mtaD	5-methylthioadenosine/S-adenosylhomocysteine deaminase GN=mtaD	15	15	15	52.2	52.2	52.2	48.853	0	190.19	894890000	120	80402000	194890000	115110000	37596000	29127000	10771000	68092000	131840000	169150000	35106000	1283300	21538000	15	15	15	-1.10418	-1.33186	-1.353	-0.312457	-1.36166	-0.638504	-1.51832	-1.46588	-1.07977	-1.78677	-2.07167	-0.3308
	0.222049	-0.292622	A0A0B5YUB0	3480	Thioredoxin GN=trxA	4	4	4	41.3	41.3	41.3	11.478	0	11.688	30518000	19	506930	6043200	0	3598600	2636900	1171500	4132600	5375700	2098300	4633900	0	319920	4	4	4	-6.25155	-5.92992	-5.52618	-3.76809	-4.90418	-3.85161	-5.04253	-5.24586	-6.5414	-4.74455	-3.55183	-3.74203
	0.216892	-0.316349	Q4MN23	1842	Bacterial extracellular solute-binding s, 5 Middle family protein GN=AQ16_1842	42	42	42	61.3	61.3	61.3	66.628	0	323.31	2769900000	467	150920	2006700	1569100	363220000	485630000	181110000	1420900	1395800	2079600	1372000000	192960000	166430000	42	42	42	-5.42901	-6.42104	-6.01145	2.68041	2.62569	3.19572	-4.67646	-6.27498	-5.96101	3.18346	3.47462	2.05088
	0.216513	-0.171455	Q4MHA2	2335	Phosphoglucosamine mutase GN=glmM	20	20	20	64.1	64.1	64.1	48.474	0	184.09	1982900000	151	180790000	531350000	261410000	414940	1564600	0	228040000	336940000	436560000	5824100	0	0	20	20	20	0.492901	-0.210918	0.72	-6.08514	-6.10189	-4.73071	0.499229	0.287293	0.729825	-5.30997	-3.60953	-5.77492
	0.211874	0.333518	Q4MT73	849	Flagellar hook-associated protein 2 GN=AQ16_849	21	21	21	57.2	57.2	57.2	51.147	0	90.786	569960000	66	38720000	187150000	84376000	2012100	6132300	1219500	79468000	88547000	78053000	1390200	2240700	652100	21	21	21	-2.20635	-1.13094	-1.18267	-6.48815	-3.51093	-3.05407	-0.860102	-2.50381	-2.1566	-5.84003	-2.12822	-4.12963
	0.209888	0.147358	Q4MJI5	galE	UDP-glucose 4-epimerase GalE GN=galE	12	12	12	37.6	37.6	37.6	36.885	0	66.844	662780000	73	30888000	144410000	63231000	30200000	35601000	11392000	58821000	64970000	130260000	88321000	4456600	235750	12	12	12	-1.51018	-1.51103	-1.18771	-0.334905	-1.33509	-1.50532	-1.30945	-2.04982	-1.29172	-0.780205	-3.68825	-4.21455
	0.209175	0.118166	Q4MS66	hemL	Glutamate-1-semialdehyde 2,1-aminomutase GN=hemL	12	12	12	41.7	41.7	41.7	46.004	0	133.25	716080000	78	60425000	167220000	124790000	0	2700800	0	95876000	103070000	161840000	0	166200	0	12	12	12	-1.16687	-0.981058	-0.553241	-5.1797	-4.01763	-4.1368	-1.09391	-1.18163	-0.780124	-5.51907	-4.26746	-4.03887
	0.195957	-0.150265	A0A0B5YXZ4	2407	50S ribosomal protein L11 GN=rplK	17	17	17	63.8	63.8	63.8	14.975	0	323.31	10834000000	252	1092000000	2568300000	1168900000	4223300	4912900	1107900	1014200000	3189400000	1786300000	4983500	0	0	17	17	17	3.11529	2.79425	2.36967	-4.51539	-4.86944	-5.27673	2.68173	3.30944	2.73884	-5.5371	-4.55532	-3.98715
	0.195746	-0.210169	A0A0B5Z5R8	2850	UvrABC system protein A GN=uvrA	15	15	15	17.8	17.8	17.8	106.55	0	28.749	166700000	21	35405000	35973000	17191000	4014300	5964200	4154600	20247000	36814000	6542800	396030	0	0	15	15	15	-2.77625	-3.59336	-3.18323	-2.73488	-3.56337	-2.41095	-2.45946	-2.85101	-3.61187	-8.18939	-3.14258	-3.24748
	0.195085	0.239667	Q4MV63	5591	Uncharacterized protein GN=AQ16_5591	9	9	9	15.6	15.6	15.6	73.957	0	26.509	165900000	21	18911000	38869000	28140000	0	0	0	16388000	46374000	8050100	0	1183300	7985100	9	9	9	-2.72451	-3.1704	-2.75672	-5.00241	-7.02175	-5.88892	-2.50594	-2.86696	-3.99772	-6.0958	-3.87216	-5.49796
	0.193799	0.100705	Q4MVV5	ald	Alanine dehydrogenase GN=ald	31	15	15	97.3	57.3	57.3	40.108	0	323.31	2519300000	355	83393000	155420000	94979000	198540000	166010000	59717000	89151000	116990000	184820000	875730000	144660000	349860000	15	15	31	-0.726939	-1.08872	-0.80906	0.738346	1.0864	0.576555	-0.831172	-1.30787	-0.787795	2.74627	2.0533	2.49026
	0.193771	-0.416495	A0A0B5YX80	2172	DNA ligase GN=ligA	13	13	13	28.3	28.3	28.3	75.155	0	35.142	256960000	35	24816000	60544000	13224000	0	0	0	33220000	118760000	6394000	0	0	0	13	13	13	-2.67696	-2.80758	-3.09597	-6.02455	-6.10435	-5.52617	-1.90907	-1.3769	-4.04506	-5.3308	-3.19642	-4.43447
	0.193117	0.737481	Q4MNZ8	3718	Radical SAM methylthiotransferase, MiaB/RimO family protein GN=AQ16_3718	9	9	9	28.4	28.4	28.4	51.427	0	97.998	227080000	17	9636600	42035000	38734000	0	0	0	31120000	28449000	77101000	0	0	0	9	9	9	-3.53041	-3.02622	-2.23754	-5.82635	-7.02974	-4.32647	-2.22802	-6.49948	-2.27911	-7.6484	-2.73387	-4.15728
	0.19061	-0.168564	Q4MJA7	3821	Uncharacterized protein GN=AQ16_3821	4	4	4	16.8	16.8	16.8	30.698	0	18.917	32258000	8	2114000	5321100	2793300	0	0	0	7981900	6553000	7495300	0	0	0	4	4	4	-5.02155	-5.19924	-5.63622	-6.17676	-6.64903	-4.9602	-4.54969	-5.45039	-5.35124	-7.00251	-1.93118	-3.13753
	0.188848	0.248532	A0A0B5YT91	2397	Elongation factor G GN=fusA	81	81	81	83.1	83.1	83.1	76.324	0	323.31	54452000000	1802	6686500000	14274000000	6682300000	240010000	306740000	121240000	7051500000	14391000000	4470800000	137570000	16870000	72826000	81	81	81	5.47236	5.19543	4.87169	2.09529	2.13842	2.02126	5.19198	5.58757	4.01434	0.506016	0.265607	1.1603
	0.184252	0.201512	Q4MJH2	2741	Cell shape determining, MreB/Mrl family protein GN=AQ16_2741	8	8	8	28.2	28.2	28.2	35.834	0	14.98	85603000	17	11630000	35890000	13298000	0	0	0	8007100	6037900	10740000	0	0	0	8	8	8	-3.54086	-4.01848	-4.06154	-5.13963	-6.49977	-5.47454	-3.34719	-4.23671	-4.64151	-7.0463	-4.85332	-4.38202
	0.184136	-0.168015	Q4MW11	yhaM	3-5 exoribonuclease YhaM GN=yhaM	8	8	8	28.3	28.3	28.3	35.513	0	31.326	181290000	22	11367000	23978000	14153000	3904500	12983000	1201600	19363000	19233000	51955000	23148000	0	0	8	8	8	-3.37958	-3.82264	-2.93098	-3.40994	-2.64844	-6.26819	-2.86129	-3.65487	-3.113	-2.95885	-2.30873	-4.84523
	0.182974	0.250375	Q4MR53	2999	FeS assembly protein SufBGN=sufB	31	31	31	63.9	63.9	63.9	52.523	0	323.31	3151200000	273	225870000	707100000	387730000	0	0	911510	354110000	740420000	731870000	1500600	903200	840450	31	31	31	0.728736	0.836419	1.06721	-5.85581	-7.03467	-4.69958	0.987386	-0.382769	1.27662	-6.24194	-3.55727	-4.76685
	0.180301	0.124826	A0A0B5ZEF5	2381	30S ribosomal protein S14 type Z GN=rpsN1	2	2	2	21.3	21.3	21.3	7.2957	0	4.5066	53543000	10	4329000	20069000	9564000	0	0	0	0	7610700	11970000	0	0	0	2	2	2	-4.79385	-4.24286	-4.25406	-5.88969	-8.73522	-5.78866	-4.31534	-4.93145	-4.41846	-6.56224	-4.60932	-3.6495
	0.178825	0.160996	Q4MX60	4913	Calcineurin-like phosphoesterase family protein GN=AQ16_4913	37	37	32	79.6	79.6	71.8	57.908	0	323.31	6769800000	371	597740000	1772700000	940050000	1130700	2072000	224190	870890000	1195300000	1041200000	38246000	290400000	19808000	32	37	37	2.07172	2.90215	2.38804	-5.61149	-3.96058	-5.00261	1.81512	2.59742	2.46638	-1.34891	2.98121	-2.58227
	0.178371	-0.115073	Q4MJ70	4190	Ribulose-phosphate 3-epimerase GN=rpe	8	8	8	50	50	50	23.237	0	25.537	406460000	53	35298000	58960000	35729000	18688000	25954000	8830200	48091000	69119000	59403000	33576000	7879000	4933500	8	8	8	-1.79177	-2.57219	-2.15051	-2.1484	-1.63494	-1.84718	-1.87057	-2.191	-2.10768	-1.99073	-3.63637	-1.67162
	0.177927	-0.13442	Q4MSS2	hup	DNA-binding protein HU GN=hup	6	6	6	67.8	67.8	67.8	9.6759	0	31.172	265120000	22	11452000	65997000	34359000	527690	0	1212500	18237000	86511000	45481000	1338600	0	0	6	6	6	-2.98352	-2.50237	-2.14625	-5.39819	-7.45901	-6.57348	-2.62317	-2.11243	-2.49328	-7.13819	-4.43575	-3.26831
	0.172466	-0.134948	Q4MGV4	4221	ATP-dependent protease ATPase subunit HslU GN=hslU	9	9	9	23.3	23.3	23.3	52.168	0	24.453	164300000	31	16699000	29335000	29710000	0	571390	0	32148000	30217000	25624000	0	0	0	9	9	9	-3.05654	-3.42847	-2.84792	-5.38309	-5.17383	-4.92804	-2.49476	-3.27055	-3.16277	-6.45197	-3.1561	-3.02679
	0.168577	-0.156291	A0A0B5ZD86	2516	Inosine-5-monophosphate dehydrogenase GN=guaB	38	38	38	87.5	87.5	87.5	52.388	0	272.2	3102400000	221	227230000	631050000	409320000	786700	1692200	586730	440650000	721430000	661670000	7084200	844280	0	38	38	38	0.848772	0.899653	1.35971	-5.66822	-4.83322	-4.75172	1.81226	0.877145	0.887603	-4.32255	-2.87894	-4.47486
	0.166519	0.180108	Q4MMK4	4282	Acceptor oxidoreductase, alpha subunit GN=AQ16_4282	9	9	9	25.5	25.5	25.5	64.441	0	136.8	340550000	56	35979000	40901000	47527000	33798000	22617000	7888500	19192000	109730000	16935000	5980800	0	0	9	9	9	-2.17969	-2.60387	-2.32916	-1.87607	-1.82184	-1.11049	-2.35195	-2.00034	-3.30074	-3.3002	-3.88359	-3.58688
	0.166303	-0.201965	A0A0B5Z3I4	2823	NlpC/P60 family protein GN=AQ16_2823	54	54	54	72.8	72.8	72.8	51.246	0	323.31	22887000000	801	1779900000	5680500000	2899900000	1517800	1048000	475890	3846600000	4724900000	3934500000	9951300	0	7968000	54	54	54	3.57923	3.89427	4.01743	-6.7635	-4.34494	-7.01634	4.4914	3.15506	4.45036	-6.17847	-4.87995	-4.29789
	0.165079	0.470416	Q4MK31	1238	2-oxoglutarate dehydrogenase E1 component GN=sucA	9	9	9	15	15	15	106.42	0	27.381	128580000	34	13010000	18184000	6535400	9202100	8879700	2240300	22791000	34632000	3281900	9826600	0	0	9	9	9	-3.85513	-3.24778	-3.71071	-2.68817	-3.18703	-3.1518	-2.70009	-3.37059	-6.15418	-3.77322	-3.09255	-3.56278
	0.161835	-0.144646	Q4MH07	4203	Signal recognition particle receptor FtsY GN=ftsY	7	7	7	25.2	25.2	25.2	36.508	0	11.897	114320000	17	9211500	31707000	20018000	0	773360	0	19334000	10974000	22305000	0	0	0	7	7	7	-3.64121	-3.80658	-3.35077	-5.95679	-4.77838	-5.51677	-2.88743	-3.94765	-3.52955	-5.84204	-2.79423	-2.65644
	0.161361	0.4593	A0A0B5Z9A3	82	Beta-lactamase GN=penPC	5	5	5	17.6	17.6	17.6	33.657	0	10.384	130520000	10	11696000	21634000	10304000	4026900	3382900	915940	20856000	9327500	29170000	16114000	686360	2402600	5	5	5	-3.47925	-3.75793	-4.3412	-3.21515	-3.65756	-3.3942	-3.51527	-6.37962	-3.0614	-3.02423	-2.97239	-5.47791
	0.158426	0.163335	Q4MGW1	4214	Succinate--CoA ligase [ADP-forming] subunit beta GN=sucC	13	13	13	47.4	47.4	47.4	41.634	0	73.129	306280000	49	22990000	84108000	51532000	3307900	2337000	1759700	21567000	45193000	69439000	4046900	0	0	13	13	13	-2.64193	-2.35313	-1.9232	-3.27577	-4.29488	-3.00579	-2.12507	-3.11962	-2.16358	-4.018	-3.39149	-2.90929
	0.148781	0.24927	Q4MWB5	1548	Lipase family protein GN=AQ16_1548	32	32	32	46.6	46.6	46.6	81.835	0	143.34	986870000	136	95167000	244480000	99972000	18962000	38719000	5184200	165020000	185240000	47054000	78915000	735120	7427100	32	32	32	-0.924527	-0.584325	-0.852961	-0.919023	-0.680484	-1.66739	-0.184497	-0.693612	-2.23151	-0.633305	-3.30246	-1.41206
	0.142654	0.195623	Q4MT86	836	Flagellar hook protein FlgE GN=AQ16_836	12	12	12	37.7	37.7	37.7	43.202	0	52.464	225440000	53	14481000	63941000	8587100	4058800	12314000	11511000	3758200	22111000	30378000	45876000	8419200	0	12	12	12	-3.26689	-2.87926	-3.88732	-3.02969	-3.1602	-1.29493	-4.36247	-3.2283	-3.02957	-1.70531	-0.717241	-4.74961
	0.142053	-0.198784	Q4MR50	2996	FeS assembly protein SufD GN=sufD	28	28	28	74.4	74.4	74.4	46.884	0	323.31	3885800000	258	273840000	947580000	509910000	0	2981900	755470	400400000	732680000	1016000000	1682700	0	0	28	28	28	0.627793	0.839674	2.15073	-5.618	-6.66852	-6.89931	1.093	1.7922	1.32935	-3.94235	-3.66292	-3.70011
	0.141212	-0.0838912	Q4MGS6	652	Deoxyribose-phosphate aldolase GN=deoC	11	11	11	59.2	59.2	59.2	23.397	0	16.166	104370000	14	7517400	15372000	10034000	5821700	7912200	1956800	13904000	16890000	23516000	932700	516380	0	11	11	11	-3.92734	-4.41079	-3.90832	-3.01791	-3.00623	-2.64604	-3.74037	-4.24679	-4.00761	-6.35313	-3.9784	-4.89815
	0.13356	-0.145597	A0A0B5Z5Y9	4078	Pyruvate dehydrogenase (Acetyl-transferring) E1 component, alpha subunit GN=pdhA	34	34	34	88.4	88.4	88.4	41.441	0	323.31	9687400000	407	839670000	2736500000	1289900000	54734000	61587000	23242000	1000900000	1464000000	2175200000	39108000	0	2610500	34	34	34	2.13709	3.14776	2.2812	-0.251357	-0.43382	-0.0806594	2.43479	2.40427	3.16378	-1.49566	-2.82778	-3.69472
	0.132189	0.206909	Q4MSA5	1206	Immune inhibitor A GN=ina	39	35	33	47.2	44.2	42	86.684	0	323.31	3983600000	566	183020000	397770000	185100000	411930000	369120000	250670000	247670000	375850000	148460000	905740000	230670000	277600000	33	35	39	0.388952	-0.109163	0.1239	2.86936	2.46072	2.9038	0.684577	0.258733	-1.16035	2.66307	2.6213	2.04842
	0.128623	-0.21599	Q4MXM1	4757	LPXTG cell wall anchor domain protein GN=AQ16_4757	33	33	33	68.7	68.7	68.7	65.401	0	228.65	2116000000	234	236160000	393890000	195130000	9530600	18547000	7475100	286560000	603110000	185260000	144800000	23395000	12182000	33	33	33	0.358662	-0.65458	-0.0241764	-1.52281	-1.59831	-0.77381	0.651155	0.649195	-0.972475	-0.267902	0.468324	-1.53083
	0.126542	0.0895604	A0A0B5Z4T5	1060	Peptidase M23 family protein GN=AQ16_1060	27	27	27	61.4	61.4	61.4	46.559	0	323.31	4504600000	223	342030000	1297400000	558370000	11236000	10992000	1271100	572140000	801040000	898920000	11249000	0	0	27	27	27	1.25482	1.96577	1.84756	-2.18949	-2.99371	-4.76696	1.69521	1.32892	1.77533	-5.78032	-3.74965	-3.17084
	0.126122	0.185406	Q4MI42	5335	Glucanase GN=AQ16_5335	26	26	26	67.1	67.1	67.1	50.561	0	323.31	3597800000	355	0	0	0	7224400	17666000	1939400	4384800	0	1800200	2654800000	376750000	533180000	26	26	26	-5.62289	-4.97057	-5.96493	-3.51997	-2.48559	-5.19315	-4.81871	-6.30851	-5.98738	4.70146	3.12436	2.92471
	0.120966	0.233002	Q4MLQ4	5047	M6 family metalloprotease domain protein GN=AQ16_5047	18	15	15	28.8	26.7	26.7	87.205	0	65.866	308720000	64	2697200	5310100	5961100	9623200	25536000	10676000	4047000	7994600	0	180920000	18316000	37638000	15	15	18	-5.41154	-3.53775	-5.68019	-3.02134	-1.59501	-1.75543	-5.07932	-5.46955	-4.77962	0.819796	-0.67479	-1.29569
	0.120349	0.104379	A0A0B5ZH76	2408	Transcription termination/antitermination protein NusG GN=nusG	7	7	7	50.3	50.3	50.3	20.258	0	54.63	232630000	34	30455000	86252000	19554000	0	0	317130	20804000	35924000	39328000	0	0	0	7	7	7	-2.88347	-2.41537	-3.44318	-3.92452	-6.52292	-5.47492	-2.8403	-2.99985	-3.21501	-5.96828	-4.42046	-3.45403
	0.113647	-0.0361998	A0A0B5Z3S2	2515	D-alanyl-D-alanine carboxypeptidase family protein GN=AQ16_2515	11	11	11	31.3	31.3	31.3	48.111	0	26.864	255870000	55	28610000	70193000	24340000	2588200	2072700	3411000	28440000	33905000	60634000	1675000	0	0	11	11	11	-2.80674	-2.93278	-2.6433	-2.51061	-3.48582	-2.95722	-2.89516	-2.75958	-2.61948	-6.59823	-3.18012	-3.41003
	0.108194	0.145691	Q4MSP2	1075	Acetohydroxy acid isomeroreductase, catalytic domain protein GN=AQ16_1075	9	9	9	42.1	42.1	42.1	35.301	0	34.001	138220000	31	15954000	37027000	14329000	0	1345700	0	4765900	19579000	45042000	0	0	176270	9	9	9	-3.81184	-3.54514	-3.47117	-5.17133	-6.72456	-6.40327	-4.55102	-3.80729	-2.90691	-7.91707	-4.72359	-2.17896
	0.106467	0.100994	Q4MS22	3606	Queuine tRNA-ribosyltransferase GN=tgt	10	10	10	36.9	36.9	36.9	43.213	0	57.963	327760000	31	34792000	94158000	40381000	0	0	0	7302400	74084000	77043000	0	0	0	10	10	10	-2.46394	-2.21469	-2.76361	-7.09061	-6.01165	-6.73337	-3.13329	-2.52424	-2.0877	-6.57815	-4.33383	-2.45924
	0.103156	-0.249181	Q4MPI5	1370	Isocitrate lyase GN=aceA	9	9	9	23.1	23.1	23.1	46.78	0	46.153	57474000	18	0	0	0	18277000	31702000	5018300	0	0	0	2477000	0	0	9	9	9	-5.20781	-6.90177	-5.62231	-2.24398	-1.05644	-1.90439	-6.26576	-4.25815	-6.46043	-4.01	-3.40936	-4.73864
	0.0986989	0.0591964	Q4MTQ7	3981	Peptidyl-prolyl cis-trans isomerase GN=ppiB	7	7	7	77.2	77.2	77.2	15.774	0	18.676	461070000	28	40236000	125700000	67450000	0	1845100	626410	42651000	102750000	79814000	0	0	0	7	7	7	-1.68894	-1.70959	-1.55529	-5.76609	-6.68136	-5.06979	-2.12935	-1.49216	-1.5099	-5.34892	-2.96462	-4.09978
	0.0957249	0.0336649	A0A0B5Z138	3400	Malic enzyme, NAD binding domain protein GN=AQ16_3400	20	20	20	77.4	77.4	77.4	44.069	0	323.31	2829600000	213	215630000	714910000	296820000	100550000	74528000	26434000	219740000	525580000	615770000	38333000	630400	700890	20	20	20	0.495332	0.568994	0.643787	1.41156	0.434517	1.25207	0.479193	0.365096	0.762829	-1.33941	-4.58726	-3.28261
	0.0955328	-0.0630491	Q4MVL3	3288	Dipeptidase family protein GN=AQ16_3288	10	10	10	32.5	32.5	32.5	51.266	0	43.7	267350000	37	11594000	44858000	21215000	10156000	30295000	3534500	20737000	44796000	20509000	57103000	2555800	0	10	10	10	-2.35667	-3.11701	-2.91218	-1.25437	-2.47731	-5.63805	-2.62773	-2.72055	-2.84844	-1.91593	-2.33587	-4.30778
	0.094362	-0.0481663	Q4MIN0	3878	Phosphate butyryltransferase GN=ptb	23	23	23	84.3	84.3	84.3	31.526	0	323.31	5628000000	311	142710000	294850000	164880000	1126100000	1412100000	225640000	159730000	256950000	292580000	1017400000	188360000	346720000	23	23	23	1.46068	0.942615	1.34992	2.87579	2.28433	2.45651	1.43947	1.12634	1.3319	3.63205	5.05867	4.29221
	0.0936821	0.134161	Q4MWC6	1557	Uncharacterized protein GN=AQ16_1557	31	31	31	60.8	60.8	60.8	65.848	0	208.45	1518900000	323	72879000	128600000	93243000	122520000	145870000	51844000	83053000	149780000	45321000	390630000	40764000	194390000	31	31	31	-0.779497	-1.48842	-0.889621	1.19422	1.06699	1.34126	-0.585769	-0.880621	-2.09363	1.46506	0.32838	0.863031
	0.0934808	-0.0629545	A0A0B5ZEY0	728	Malic enzyme, NAD binding domain protein GN=AQ16_728	24	24	24	50.5	50.5	50.5	62.189	0	203.06	1327000000	197	72869000	213880000	121860000	36559000	46018000	21831000	122240000	301100000	129570000	191530000	30736000	38764000	24	24	24	-0.870918	-0.990717	-0.625945	-0.0376013	-0.679687	0.328847	-0.613507	-0.494331	-1.19088	0.0743101	1.33755	-0.208659
	0.0932957	-0.0758896	Q4MGT7	2645	YwhD family protein GN=AQ16_2645	4	4	4	33.1	33.1	33.1	19.027	0	20.06	145750000	26	10316000	22890000	6367400	8793100	9099500	6852900	7671100	42226000	21154000	0	3192600	7189100	4	4	4	-3.8198	-4.06732	-3.48387	-5.31056	-5.98702	-5.5267	-4.08896	-3.27841	-3.77595	-4.79869	-3.49624	-4.87623
	0.0931444	-0.213005	Q4MHJ1	369	Fungalysin metallopeptidase family protein GN=AQ16_369	23	23	23	61.2	61.2	61.2	54.619	0	321.26	489010000	120	0	0	0	17904000	24265000	10433000	0	0	1655000	254460000	80415000	99878000	23	23	23	-4.48947	-6.86893	-5.77294	-0.77714	-1.54686	-0.692849	-5.57087	-4.70218	-6.21929	0.695942	1.46899	0.754918
	0.0902355	0.0407768	Q4MMU9	3941	Calcineurin-like phosphoesterase family protein GN=AQ16_3941	10	5	5	26.1	14.2	14.2	57.956	0	24.54	113270000	16	5443900	0	10044000	0	1105200	178540	8227800	23653000	7960000	18273000	0	38383000	5	5	10	-4.47651	-4.39292	-3.97151	-6.49487	-5.35635	-4.72579	-4.24493	-4.36314	-4.3552	-2.80784	-4.81096	-3.99594
	0.0880945	0.131929	Q4MHE9	158	ABC transporter family protein GN=AQ16_158	2	2	2	3.7	3.7	3.7	66.422	0.0059524	3.652	6765100	5	0	0	186360	1386700	3316500	1875500	0	0	0	0	0	0	2	2	2	-4.92555	-5.52998	-4.40506	-5.33923	-5.22932	-4.2781	-4.24327	-5.53195	-5.48115	-9.14599	-3.90687	-3.20766
	0.0877445	-0.0464796	Q4MJ63	4184	Methionyl-tRNA formyltransferase GN=fmt	10	10	10	53.5	53.5	53.5	34.722	0	80.906	331260000	40	26808000	94431000	37954000	0	0	0	40733000	60341000	70996000	0	0	0	10	10	10	-2.26777	-2.19868	-1.80215	-5.79336	-4.71346	-5.81391	-1.85702	-2.26697	-2.00516	-7.53119	-2.26755	-3.48504
	0.084476	0.0590646	Q4MSP4	1073	Type I phosphodiesterase / nucleotide pyrophosphatase family protein GN=AQ16_1073	19	19	19	41.7	41.7	41.7	72.275	0	323.31	1729900000	166	116630000	446580000	195040000	20313000	32123000	6882900	152720000	343650000	415950000	0	0	0	19	19	19	-0.262067	0.252582	0.133816	-1.12548	-1.30637	-1.28735	-0.183946	-0.235582	0.366665	-8.01119	-4.1313	-2.81526
	0.0819188	0.06389	Q4MTS4;Q4MME9	asnB	Asparagine synthase GN=asnB	11	11	11	22.1	22.1	22.1	73.411	0	36.489	124230000	27	12234000	35847000	16314000	370420	1591100	0	14591000	35870000	7416300	0	0	0	NaN	NaN	NaN	-3.62184	-3.70083	-3.38318	-7.32555	-4.36933	-4.77467	-3.2038	-3.59627	-4.09744	-5.96877	-2.3044	-5.41021
	0.0787518	0.091869	Q4MGW0	4215	Succinate--CoA ligase [ADP-forming] subunit alpha GN=sucD	14	14	14	58.7	58.7	58.7	31.212	0	78.896	357920000	51	21739000	85222000	32904000	4137800	2122500	1200200	22145000	65433000	121810000	1208700	0	0	14	14	14	-2.50817	-2.24111	-2.95288	-2.10773	-3.62143	-2.49624	-3.3607	-2.40315	-2.21392	-4.84015	-3.1054	-2.45938
	0.0785941	-0.0246043	Q4MM78	fabH	3-oxoacyl-[acyl-carrier-protein] synthase 3 GN=fabH	17	17	17	58.4	58.4	58.4	33.453	0	105.56	838140000	90	80118000	263920000	69576000	7618500	10472000	992890	76571000	151160000	173680000	2434000	0	1603500	17	17	17	-0.810038	-1.03328	-0.894703	-2.2773	-2.1906	-5.04295	-0.738453	-1.04672	-0.879032	-6.22221	-2.57463	-3.7899
	0.0769542	-0.0432879	Q4MJW7	4367	Glutamine synthetase GN=glnA	32	32	32	66.4	66.4	66.4	50.117	0	323.31	14803000000	680	983580000	3064000000	1493300000	573450000	461790000	263330000	1263500000	2340800000	2872400000	1012800000	125580000	348000000	32	32	32	2.81222	3.07506	3.20152	3.25644	2.85108	3.19319	2.94474	2.88041	3.39351	2.89185	3.45148	2.82949
	0.076482	0.119539	Q4MLF7	2536	tRNA uridine 5-carboxymethylaminomethyl modification enzyme MnmG GN=gidA	16	16	16	35.9	35.9	35.9	70.294	0	69.251	263520000	43	30558000	56914000	32127000	0	0	0	31412000	88910000	21842000	0	0	1755800	16	16	16	-2.30783	-3.04356	-2.11599	-6.75136	-6.00694	-5.65369	-2.0404	-2.24088	-3.54472	-4.33434	-3.71718	-3.21453
	0.0760279	0.0760514	Q4MQI2	2049	Fumarate hydratase class I GN=AQ16_2049	12	12	12	32.2	32.2	32.2	55.915	0	265.07	1560100000	101	111020000	330200000	304950000	21031000	7373100	2155600	88943000	384310000	233400000	49562000	412520	26781000	12	12	12	-0.279827	-0.236864	0.670789	-1.18098	-1.86705	-5.38728	0.0999157	0.180086	-0.354058	-1.25545	-4.25138	-0.158918
	0.0740203	-0.072477	A0A0B5YXA9	3717	Ribosomal RNA small subunit methyltransferase E GN=AQ16_3717	2	2	2	10.8	10.8	10.8	27.698	0	16.132	64588000	13	6101700	5421400	2610700	0	0	0	4042400	23252000	23160000	0	0	0	2	2	2	-4.32089	-5.05057	-5.02635	-4.71504	-6.19783	-3.90953	-5.21786	-4.52321	-4.43931	-7.23778	-4.46676	-3.90238
	0.0733478	-0.141327	A0A0B5Z7U9	2484	Methionine--tRNA ligase GN=metG	28	28	28	41.1	41.1	41.1	75.292	0	166.16	1468900000	125	125150000	304750000	153640000	8630600	12253000	2336100	168400000	522130000	116350000	31885000	6690600	16709000	28	28	28	-0.086316	-0.197511	-0.458797	-2.68834	-2.71322	-3.99017	0.682765	0.430573	-1.43198	-1.96936	-4.1959	-3.09711
	0.0718119	0.093074	Q4MVP6	3318	Catabolite control protein A GN=ccpA	13	13	13	44.3	44.3	44.3	36.91	0	70.004	405800000	65	37362000	70325000	44807000	778210	453950	0	32818000	75698000	123600000	18567000	1386300	0	13	13	13	-2.05962	-2.62774	-1.60006	-5.49972	-6.38607	-5.68873	-2.12898	-2.81112	-1.62654	-6.26371	-2.88034	-2.92047
	0.0710473	0.0989669	Q4MHA3	2334	Glutamine--fructose-6-phosphate aminotransferase [isomerizing] GN=glmS	32	32	32	59.5	59.5	59.5	65.735	0	323.31	5729900000	522	357620000	672300000	675390000	402420000	363240000	204900000	561940000	949690000	381540000	743060000	153280000	264550000	32	32	32	1.45944	0.870381	1.8775	2.82905	2.41773	2.93287	1.71986	1.66749	0.523071	2.59993	2.61137	3.12452
	0.0684819	0.199006	A0A0B5YSN6	2526	DNA gyrase subunit B GN=gyrB	7	7	7	16.1	16.1	16.1	71.896	0	20.223	90962000	17	7893200	24084000	11934000	0	0	0	13048000	30897000	3105700	0	0	0	7	7	7	-3.70008	-4.75188	-3.52458	-6.72077	-6.44657	-6.17402	-3.24688	-3.25572	-6.07096	-6.88214	-4.13403	-4.58153
	0.0678832	0.0696385	Q4MVY4	pyk	Pyruvate kinase GN=pyk	46	46	46	84.6	84.6	84.6	62.237	0	323.31	9043000000	579	904690000	1753700000	1357800000	215580000	164470000	66340000	1018800000	2379000000	1066800000	90885000	1102200	23855000	46	46	46	2.49776	1.99467	2.59139	1.89744	0.838888	1.44009	2.43853	2.73353	1.70284	-0.320716	-3.26652	-0.673786
	0.0621707	-0.0454183	Q4MK53	1019	Pseudouridine synthase GN=rluB	5	5	5	25.6	25.6	25.6	27.556	0	28.864	115140000	22	16641000	24023000	15782000	0	1245600	0	10437000	20411000	24242000	2360300	0	0	5	5	5	-3.37117	-4.12161	-4.13766	-6.45868	-7.69887	-6.27635	-3.80692	-3.8723	-3.81497	-7.02638	-3.59885	-3.09977
	0.0599855	-0.122754	A0A0B5Z9Z8	5568	Protective antigen GN=pagA	12	12	11	27.4	27.4	25.7	85.822	0	38.612	208310000	35	27876000	68089000	15548000	0	1153200	0	42580000	40134000	12924000	0	0	0	11	12	12	-2.631	-2.91097	-3.28295	-6.3192	-7.37974	-5.6486	-1.61282	-2.86417	-3.97967	-6.769	-4.1744	-3.77849
	0.057638	0.0898768	Q4MPU8	2265	4-hydroxyphenylpyruvate dioxygenase GN=hppD	13	13	13	40.1	40.1	40.1	42.103	0	91.089	170350000	43	0	0	0	7900600	12822000	2026200	0	0	1128600	130690000	9194700	6587900	13	13	13	-5.74484	-6.38884	-5.86262	-1.78937	-2.14908	-3.00006	-5.12239	-6.33827	-6.80527	0.0512295	-2.0548	-4.7423
	0.0556481	-0.0619364	Q4MIH8	2777	3D domain protein GN=AQ16_2777	31	31	27	84.5	84.5	84.5	30.685	0	323.31	31331000000	835	3560500000	8299900000	3826100000	1434300	387330	990920	3146200000	6678000000	5801000000	3381400	1085800	12320000	27	31	31	4.66502	4.13662	3.74224	-6.80064	-6.35421	-6.31906	3.69242	4.54762	4.48965	-6.98538	-2.28061	-3.17586
	0.0526533	0.126355	Q4MQE1	2089	Chitinase A1 GN=chiA1	52	52	52	78.6	78.6	78.6	74.109	0	323.31	3984300000	354	0	1751500	2162000	5273300	8974700	4164600	2306600	12627000	5149100	3273300000	467990000	200640000	52	52	52	-5.52206	-7.26148	-5.42503	-6.10592	-5.69012	-4.61087	-5.40045	-7.30367	-5.88352	4.91808	4.55101	1.71042
	0.051919	0.0561995	Q4MMJ9	4277	Protein RecA GN=recA	16	16	16	67.6	67.6	67.6	37.297	0	170.49	1076700000	108	97836000	267400000	136320000	466580	666340	0	130880000	155260000	244470000	28034000	3146800	12172000	16	16	16	-1.01559	-0.257077	-0.563759	-5.14175	-4.87192	-5.09031	-0.160858	-1.19973	-0.644441	-2.51637	-2.62301	-1.26097
	0.0492713	-0.166949	Q4MNL0	4415	Urocanate hydratase GN=hutU	15	15	15	42	42	42	60.719	0	81.561	167070000	40	0	0	0	0	2021400	401910	600840	0	0	133770000	10351000	19928000	15	15	15	-4.04596	-5.04019	-7.09547	-6.31739	-4.22366	-5.1528	-4.99531	-6.60567	-4.07979	0.373858	-1.08626	-1.66946
	0.04363	0.0933083	Q4MGG0	2662	Peptidase M20/M25/M40 family protein GN=AQ16_2662	33	33	33	74	74	74	50.365	0	323.31	2143300000	206	1250300	7831700	5280000	2143100	2600800	1570500	843740	0	9242800	1774700000	140010000	197860000	33	33	33	-5.99567	-6.22694	-5.94017	-5.4947	-6.84984	-6.40212	-4.70571	-6.99089	-6.7461	4.17063	2.04115	-1.39492
	0.0418194	0.0737211	A0A0B5ZFK7	4553	Beta-channel forming cytolysin family protein GN=AQ16_4553	21	21	21	58.7	58.7	58.7	45.709	0	152.4	952720000	110	56237000	310860000	130720000	6784900	11412000	905380	140790000	153500000	141020000	0	0	486720	21	21	21	-1.3627	-0.257836	-1.04068	-1.99889	-2.17532	-3.55586	0.0328877	-1.32342	-1.59184	-7.35487	-2.8796	-4.42156
	0.0415987	0.087465	A0A0B5Z4P2	4324	Peptidase T GN=pepT	8	8	8	26.3	26.3	26.3	45.958	0	38.236	140200000	25	577930	7478400	2488700	12365000	19437000	2202200	0	14268000	7167100	58510000	8698900	7010400	8	8	8	-4.91867	-4.40078	-5.03306	-2.29509	-2.38429	-3.13245	-6.2415	-4.05684	-4.31657	-0.949238	-2.58724	-2.50167
	0.0375858	0.0275803	Q4MS50	3578	50S ribosomal protein L21 GN=rplU	10	10	10	73.5	73.5	73.5	11.191	0	139.71	3577900000	83	437230000	769000000	553510000	1569800	1301500	928320	360340000	834970000	606600000	10170000	0	2268300	10	10	10	1.66464	1.17838	1.64475	-5.41181	-5.60252	-5.4534	1.44621	1.81064	1.14819	-4.50509	-2.73181	-2.49733
	0.0375639	-0.0307726	Q4MLF6	2535	tRNA modification GTPase MnmE GN=trmE	10	10	10	20.1	20.1	20.1	50.561	0	54.786	153070000	36	11080000	55623000	26306000	0	0	0	5825600	16019000	38217000	0	0	0	10	10	10	-3.51285	-3.39692	-2.93996	-5.39214	-5.70704	-6.43391	-2.91496	-3.65444	-3.18802	-7.63816	-3.86608	-4.41629
	0.0352833	-0.0192515	A0A0B5Z963	2394	50S ribosomal protein L3 GN=rplC	24	24	24	80.5	80.5	80.5	22.692	0	323.31	5271300000	242	620520000	1303700000	598140000	1811200	0	0	425340000	1209800000	1111900000	0	0	0	24	24	24	2.0098	1.72892	1.61437	-4.50229	-5.77983	-5.4195	1.52351	1.89878	1.98855	-5.80332	-3.59063	-3.66095
	0.0335605	-0.0489229	Q4MR40	2987	Glycine cleavage system H protein GN=gcvH	4	4	4	47.2	47.2	47.2	13.987	0	49.542	109720000	47	0	14503000	5910600	8305700	13871000	15188000	4920800	9578100	6869700	20382000	142020	10052000	4	4	4	-5.73073	-4.7253	-4.4012	-2.8614	-2.58905	-1.1239	-5.44913	-4.4775	-4.78384	-3.41914	-3.48621	-4.16482
	0.0332476	-0.0202937	A0A0B5Z657	2405	50S ribosomal protein L10 GN=rplJ	25	25	25	88.6	88.6	88.6	18.037	0	323.31	10279000000	256	1137800000	2476700000	1176400000	5981100	8631300	4784100	1145300000	2545500000	1773700000	4016000	0	0	25	25	25	3.24467	2.76858	2.65197	-3.79635	-3.72758	-1.51824	2.80006	3.10442	2.82162	-5.73037	-3.61192	-4.04131
	0.0315098	0.0326264	Q4MRB5;Q4MV42;Q4MKX0	galU	UTP--glucose-1-phosphate uridylyltransferase GN=galU	16	16	16	60	60	60	33.557	0	60.458	632700000	63	60762000	195020000	66262000	0	0	0	53421000	112930000	143130000	1175400	0	0	NaN	NaN	NaN	-1.89671	-1.27376	-1.13236	-6.27514	-5.75113	-5.4459	-1.57127	-1.85276	-0.976684	-4.82126	-2.94518	-4.42959
	0.0310103	0.0209877	Q4MI16	2476	Pur operon repressor PurR GN=purR	7	7	7	31.2	31.2	31.2	31.066	0	30.626	153990000	36	15256000	33653000	20628000	0	0	1350300	11164000	31882000	40061000	0	0	0	7	7	7	-3.34149	-3.14856	-2.99753	-6.2195	-6.04418	-5.01483	-3.5784	-2.88968	-3.08247	-6.12926	-3.66835	-3.54494
	0.0309768	-0.0336525	A0A0B5Z6V1	5106	Polysaccharide deacetylase family protein GN=AQ16_5106	14	14	13	60.4	60.4	56	30.763	0	151.01	2074500000	141	232600000	453990000	173890000	2774500	6497700	2444700	202880000	520990000	478410000	0	0	0	13	14	14	0.208171	0.717477	-0.393768	-4.22766	-4.56959	-2.63278	0.000896955	0.0724432	0.559497	-7.22319	-4.28617	-4.75861
	0.0274124	0.0254644	Q4MNU8	3763	Glucokinase GN=glcK	13	13	13	48.9	48.9	48.9	34.393	0	102.74	865780000	91	81675000	197550000	93872000	645830	1965100	0	98531000	160530000	225730000	5281000	0	0	13	13	13	-0.595552	-0.914617	-0.55687	-5.57138	-4.70586	-3.80838	-0.777486	-1.18309	-0.182856	-7.34575	-3.9968	-4.7934
	0.0269833	-0.0191338	Q4MIM9	3879	Leucine dehydrogenase GN=ldh	28	28	28	62.6	62.6	62.6	39.881	0	323.31	10111000000	785	596370000	1346700000	741160000	1143000000	1178900000	582040000	657250000	706170000	1133700000	1436500000	180430000	409090000	28	28	28	1.76471	1.65606	2.00808	4.56122	3.99595	4.17021	2.00093	1.40346	2.08186	3.33498	2.96569	3.04344
	0.0259086	0.0180453	A0A0B5Z337	3429	Translation initiation factor IF-3 GN=infC	8	8	8	45.2	45.2	45.2	18.949	0	76.237	799270000	70	102340000	172930000	93327000	0	0	0	81665000	194220000	152590000	0	0	2209600	8	8	8	-0.495889	-1.14713	-0.807984	-6.40773	-6.4266	-6.01307	-1.04099	-0.572275	-0.891872	-7.0682	-5.04679	-4.03872
	0.0257353	0.0242871	Q4MS12	3615	Adenine phosphoribosyltransferase GN=apt	8	8	8	34.1	34.1	34.1	18.643	0	34.337	293420000	31	44919000	105290000	30960000	0	0	0	15928000	45751000	49438000	1131700	0	0	8	8	8	-1.80882	-2.28184	-2.71869	-5.50488	-7.27044	-4.94623	-2.63374	-2.20388	-2.0446	-6.5183	-4.50819	-4.20968
	0.0257037	-0.081835	Q4MQP1	1902	Bacillolysin GN=npr	17	17	17	29.9	29.9	29.9	60.828	0	323.31	2426300000	370	12882000	14931000	14282000	661970000	592900000	410540000	26137000	16421000	17942000	413720000	102820000	141700000	17	17	17	-4.397	-5.73866	-5.20909	3.39339	3.36678	4.14384	-3.14203	-6.50292	-5.45428	1.85505	1.95599	0.342224
	0.0253459	0.0299691	A0A0B5YR41	994	Cytidylate kinase GN=cmk	6	6	6	32.4	32.4	32.4	25.259	0	12.093	175210000	17	17478000	28902000	18946000	0	0	630160	26915000	42607000	39738000	0	0	0	6	6	6	-2.39949	-3.67587	-2.9142	-5.36729	-6.39896	-4.90129	-2.74986	-3.13816	-3.19144	-7.91427	-3.75481	-3.80953
	0.0249223	-0.0222476	Q4MVR9	2910	Tyrosine--tRNA ligase GN=tyrS	14	14	14	44.5	44.5	44.5	46.991	0	94.183	489230000	58	34746000	151480000	45926000	2008700	0	760480	39651000	105830000	108830000	0	0	0	14	14	14	-1.96087	-1.19059	-1.93945	-4.81295	-5.70996	-5.40168	-1.80823	-1.8572	-1.35872	-6.7144	-4.29892	-3.67353
	0.0231882	0.0151726	Q4MX58	4915	Matrixin family protein GN=AQ16_4915	8	8	8	59.4	59.4	59.4	19.136	0	303.39	453440000	83	0	0	0	4325400	7776700	2489800	0	5566800	2678700	373310000	40035000	17248000	8	8	8	-6.02757	-6.04912	-6.17255	-4.59255	-4.54832	-3.82876	-6.2675	-5.67331	-6.35395	1.58802	1.23524	-2.94899
	0.0219264	0.0670485	Q4MM85	1312	Bacterial extracellular solute-binding s, 5 Middle family protein GN=AQ16_1312	41	39	39	65.6	64.3	64.3	61.597	0	298.36	2605300000	353	0	0	4035000	288950000	501880000	125750000	851970	6828200	3521100	1050500000	189340000	433640000	39	39	41	-5.2522	-5.68561	-7.57503	2.34283	2.76544	2.41849	-4.86341	-6.49945	-7.35113	2.81396	2.57507	4.06727
	0.0188253	-0.0234054	Q4MM80	1317	3-oxoacyl-[acyl-carrier-protein] synthase 2 GN=fabF	25	25	25	82.3	82.3	82.3	43.716	0	323.31	3193200000	209	221140000	820410000	290070000	19605000	36653000	4849500	337920000	593400000	863910000	5264100	0	0	25	25	25	0.580355	1.25989	0.632295	-0.800029	-1.04441	-1.9188	0.826004	0.250414	1.46634	-4.17138	-3.77978	-3.63335
	0.0181168	-0.0139476	A0A0B5Z759	3410	Isocitrate dehydrogenase [NADP] GN=icd	19	19	19	45.8	45.8	45.8	46.972	0	40.12	521890000	64	54314000	124100000	90903000	8080100	15062000	3287700	66422000	59463000	84951000	15044000	260610	0	19	19	19	-1.51197	-1.68441	-1.16052	-2.0675	-2.7788	-1.97867	-1.07868	-1.78582	-1.45057	-2.73431	-4.60872	-3.65932
	0.0170966	0.0308545	Q4MS63	3565	Valine--tRNA ligase GN=valS	39	39	39	49	49	49	101.66	0	214.39	2399800000	263	196300000	505870000	180910000	47583000	103870000	26120000	365850000	506310000	158290000	240440000	12943000	55349000	39	39	39	0.0709829	0.301388	-0.0833401	0.352437	0.430283	0.248059	0.927585	0.328741	-1.05986	0.965706	-1.73561	1.12729
	0.0166855	-0.021759	Q4MJK9	3706	30S ribosomal protein S20 GN=rpsT	5	5	5	40	40	40	9.3417	0	145.98	220270000	37	16096000	32765000	33150000	0	0	0	20421000	43942000	73896000	0	0	0	5	5	5	-2.85827	-2.84921	-2.18323	-5.17106	-6.04909	-5.29803	-3.07114	-2.87852	-1.87577	-6.61228	-4.01496	-3.54426
	0.016586	-0.035852	Q4MJ58	4179	Guanylate kinase GN=gmk	7	7	7	40	40	40	23.677	0	20.41	90498000	20	7766200	14447000	4549700	0	0	0	10192000	29276000	24267000	0	0	0	7	7	7	-3.55823	-4.4884	-4.14654	-5.22307	-7.55798	-5.53574	-5.35481	-3.41681	-3.31399	-6.28293	-3.49105	-2.11187
	0.0136635	0.0210334	Q4MM92	1306	Bacterial extracellular solute-binding s, 5 Middle family protein GN=AQ16_1306	51	51	46	66.1	66.1	63.3	61.712	0	323.31	9979900000	939	1932900	9151600	4652700	654140000	834360000	345590000	2002800	5823300	6054500	5131600000	607250000	2377300000	46	51	51	-8.94548	-8.76648	-7.36253	3.68418	4.0623	2.40367	-8.46986	-8.47563	-8.19211	5.83819	4.94221	5.10477
	0.0103527	-0.0154612	A0A0B5ZG92	4818	LPXTG cell wall anchor domain protein GN=AQ16_4818	22	22	22	48.7	48.7	48.7	42.063	0	157.89	605210000	74	48792000	163030000	80286000	0	0	0	95375000	40375000	173240000	0	0	4112800	22	22	22	-1.60898	-1.17983	-0.864149	-7.35907	-6.96637	-5.60526	-0.850671	-2.08098	-0.674926	-6.27485	-3.47359	-4.22105
	0.0101428	-0.00771832	Q4MJE9	2126	Periplasmic binding family protein GN=AQ16_2126	5	5	5	21.6	21.6	21.6	34.43	0	12.579	120680000	18	8136700	28040000	15942000	0	850180	0	4004400	19543000	38366000	5802600	0	0	5	5	5	-3.74391	-4.00687	-3.47813	-7.38083	-6.54255	-3.88568	-3.77829	-4.05622	-3.37124	-4.14307	-3.8185	-3.71529
	0.00821221	0.0106524	A0A0B5Z245	3491	5-nucleotidase, lipoprotein e(P4) family GN=AQ16_3491	10	10	10	34.5	34.5	34.5	30.976	0	42.623	150570000	31	782220	3798600	1538600	5591800	10672000	6419200	0	0	0	83322000	10257000	28191000	10	10	10	-5.59228	-4.78463	-5.537	-2.21439	-2.70492	-1.67879	-4.67614	-5.82365	-5.44609	-0.232394	-0.912732	-1.56932
	0.00721002	-0.00467094	Q4MTF9	4079	Pyruvate dehydrogenase E1 component subunit beta GN=pdhB	28	28	28	81.2	81.2	81.2	35.229	0	323.31	18431000000	585	1749400000	4946900000	2058000000	125320000	106880000	50083000	1934000000	3319300000	3912800000	141230000	23071000	64489000	28	28	28	3.60421	3.77746	3.36699	1.77082	1.00112	1.32473	3.27541	3.60134	3.88592	0.512466	0.337515	0.526129
	0.00643987	0.00524124	A0A0B5Z8U7	3715	Chaperone protein DnaJ GN=dnaJ	5	5	5	18.9	18.9	18.9	40.319	0	15.279	145460000	17	7125100	44867000	13167000	0	0	0	20235000	26407000	30224000	3436200	0	0	5	5	5	-3.92491	-3.27353	-3.35443	-7.00176	-5.53094	-6.17306	-3.30693	-3.86087	-3.4008	-4.3342	-4.21404	-4.39277
	0.00626392	-0.00672762	Q4MIM7	lpdA	Dihydrolipoyl dehydrogenase GN=lpdA	25	25	25	52.6	52.6	52.6	50.76	0	305.11	1544000000	276	34154000	101130000	75777000	124690000	152540000	65483000	54798000	65945000	61549000	547700000	97869000	162410000	25	25	25	-2.02903	-1.96158	-1.18908	1.11746	0.941886	1.2008	-1.27392	-1.86873	-2.01686	1.75026	1.90044	1.07769
	0.00491224	0.00575701	Q4MGP9	2404	50S ribosomal protein L7/L12 GN=rplL	20	20	20	95.8	95.8	95.8	12.517	0	323.31	7254800000	307	745450000	1634700000	1013900000	7732600	7487100	9751200	940230000	2111000000	772320000	5801800	0	6449400	20	20	20	2.11637	1.88632	2.18107	-2.7168	-3.94923	-1.45027	2.18499	2.62755	1.35394	-5.13628	-4.33604	-3.66423
	0.0039909	0.0107094	Q4MPZ8	2309	Bacterial extracellular solute-binding s, 5 Middle family protein GN=AQ16_2309	53	53	49	65.9	65.9	62.1	61.682	0	323.31	4594200000	403	358620	4124000	2259800	87817000	136660000	42325000	1973600	13961000	5435100	2774200000	466420000	1058700000	49	53	53	-4.84349	-7.16371	-5.51371	0.155307	-0.370355	-0.497788	-4.77609	-6.24526	-6.53168	5.03036	4.98291	3.77051
	0.00305966	-0.00542212	Q4MII6	2783	Cell wall hydrolase GN=AQ16_2783	47	47	47	84.8	84.8	84.8	61.123	0	323.31	22463000000	439	2576400000	4798900000	3293700000	4146600	1552900	3255900	4318100000	5431200000	2021200000	12001000	2156200	0	47	47	47	4.35316	3.57309	4.2364	-6.19299	-8.05868	-4.75039	4.75324	4.39748	3.02819	-5.9681	-5.37306	-3.46611
	0.00289382	-0.00301997	Q4MS06	367	Aspartate--tRNA(Asn) ligase GN=aspS	14	14	14	28.9	28.9	28.9	66.321	0	170.2	472410000	70	46416000	111150000	82886000	0	294290	0	56832000	118460000	53397000	644330	2325100	0	14	14	14	-1.51947	-1.92035	-1.17589	-6.32859	-5.94064	-5.25654	-1.24896	-1.29348	-2.06422	-5.95758	-4.47554	-2.51678
	0.00175479	-0.00275079	A0A0B5ZDG9	3919	LPXTG cell wall anchor domain protein GN=AQ16_3919	53	53	53	65.6	65.6	65.6	86.575	0	323.31	11339000000	1202	604270000	1622700000	469480000	802300000	1043100000	444390000	1190300000	1489200000	467810000	1951600000	407640000	846200000	53	53	53	2.11987	2.0733	1.42394	3.4426	3.43499	3.60384	2.46345	2.19277	0.969129	3.76657	4.65844	4.63223

## Sheet: DataS2 G9241 Secretome Stat
Significant	_Log of P value	Log2-Fold Change	Protein IDs	Locus Tag (AQ16_)	Fasta headers	Peptides	Razor + unique peptides	Unique peptides	Sequence coverage [%]	Unique + razor sequence coverage [%]	Unique sequence coverage [%]	Mol. weight [kDa]	Q-value	Score	Intensity	MS/MS count	Intensity BcG25E1	Intensity BcG25E2	Intensity BcG25E3	Intensity BcG25S1	Intensity BcG25S2	Intensity BcG25S3	Intensity BcG37E1	Intensity BcG37E2	Intensity BcG37E3	Intensity BcG37S1	Intensity BcG37S2	Intensity BcG37S3	Peptide counts (unique)	Peptide counts (razor+unique)	Peptide counts (all)	LFQ intensity BcG25E1	LFQ intensity BcG25E2	LFQ intensity BcG25E3	LFQ intensity BcG25S1	LFQ intensity BcG25S2	LFQ intensity BcG25S3	LFQ intensity BcG37E1	LFQ intensity BcG37E2	LFQ intensity BcG37E3	LFQ intensity BcG37S1	LFQ intensity BcG37S2	LFQ intensity BcG37S3
		25 °C compared to 37 °C
+	3.31526	7.83255	A0A0B5ZG90	5317	Thermolysin metallopeptidase, catalytic domain protein GN=AQ16_5317	38	38	36	68.4	68.4	68.4	62.364	0	323.31	16961000000	735	1291500000	3556400000	1786000000	3837600000	4386400000	1701100000	143780000	103980000	90567000	47298000	1835300	14596000	36	38	38	3.10777	3.25737	2.88996	6.08622	6.2661	5.69322	0.171199	-1.53475	-0.902422	-0.653266	-3.17499	-1.62385
+	1.71229	4.86675	Q4MW50	1487	Transglutaminase-like superfamily protein GN=AQ16_1487	38	36	36	67.4	66	66	64.551	0	323.31	2849200000	254	375000000	1202400000	622810000	125420000	108540000	29527000	151920000	117370000	105110000	1266300	1309000	8527500	36	36	38	1.12388	1.80812	1.5222	1.08724	0.857459	-0.0575378	-0.106727	-1.08674	-0.993004	-6.11186	-1.89863	-4.70261
+	2.91926	4.54455	A0A0B5Z6L7	2685	UDP-N-acetylglucosamine 1-carboxyvinyltransferase GN=murA	8	8	8	32.4	32.4	32.4	45.851	0	60.325	410250000	29	23529000	89220000	50227000	81975000	77557000	47556000	6084500	0	29412000	4694700	0	0	8	8	8	-0.998942	-1.21897	-1.00449	-0.175789	-0.161408	0.907682	-1.13169	-5.50764	-1.86399	-5.10795	-4.30788	-3.64733
+	3.26449	4.51839	Q4MTG5	2375	Ribonuclease J GN=rnjA	24	24	24	50.5	50.5	50.5	61.799	0	142.97	1094700000	130	128180000	261630000	157030000	39395000	45404000	11685000	94618000	223860000	122940000	7323700	0	2644800	24	24	24	-0.283016	-0.56554	-0.447657	-0.213134	-0.495023	-0.310257	-0.500479	-0.8343	-1.40272	-4.00663	-5.47904	-5.08791
+	2.09265	4.5126	Q4MPG2	1349	Ornithine aminotransferase GN=rocD	20	20	20	69.9	69.9	69.9	43.228	0	248.52	804950000	194	15909000	46041000	25251000	275280000	215260000	117220000	2921400	12136000	30537000	57601000	6801700	0	20	20	20	-2.52101	-2.44762	-2.2536	1.96608	1.42087	2.24926	-5.98089	-4.35642	-2.87349	-1.02945	-2.77068	-4.10147
+	1.71137	4.16114	Q4MTD4	4104	Pyruvate carboxylase GN=pyc	29	29	29	30.8	30.8	30.8	128.5	0	75.838	424210000	92	48590000	117190000	48369000	22295000	28022000	9022300	43957000	69323000	29240000	2362400	3762400	2082500	29	29	29	-1.75214	-2.54638	-2.13673	-1.25747	-1.27076	-0.444483	-2.15607	-2.21546	-3.19017	-7.28452	-4.1176	-4.054
+	1.84235	4.10247	A0A0B5Z138	3400	Malic enzyme, NAD binding domain protein GN=AQ16_3400	20	20	20	77.4	77.4	77.4	44.069	0	323.31	2829600000	213	215630000	714910000	296820000	100550000	74528000	26434000	219740000	525580000	615770000	38333000	630400	700890	20	20	20	0.495332	0.568994	0.643787	1.41156	0.434517	1.25207	0.479193	0.365096	0.762829	-1.33941	-4.58726	-3.28261
+	2.87865	4.01581	Q4MIF1	2681	CTP synthase GN=pyrG	28	28	28	64.1	64.1	64.1	59.752	0	323.31	4477700000	276	406780000	1015500000	594840000	151140000	127900000	48835000	579570000	1088100000	436410000	25518000	1727400	1354200	28	28	28	1.34933	1.11062	1.77195	1.33462	0.999589	0.945386	2.09428	2.17345	1.13644	-1.94897	-3.41588	-3.40298
+	1.74088	3.95528	Q4MY56	4572	Glycerophosphoryl diester phosphodiesterase family protein GN=AQ16_4572	31	31	31	82.5	82.5	82.5	35.925	0	323.31	6469200000	485	482300000	1298800000	604500000	279280000	289280000	71655000	1146100000	936290000	1235700000	91026000	993140	33237000	31	31	31	1.57439	1.73849	1.77463	2.21981	1.89133	0.893038	2.61189	1.52925	1.9458	-1.02799	-4.13526	-1.6984
	1.12886	3.74619	Q4MSP4	1073	Type I phosphodiesterase / nucleotide pyrophosphatase family protein GN=AQ16_1073	19	19	19	41.7	41.7	41.7	72.275	0	323.31	1729900000	166	116630000	446580000	195040000	20313000	32123000	6882900	152720000	343650000	415950000	0	0	0	19	19	19	-0.262067	0.252582	0.133816	-1.12548	-1.30637	-1.28735	-0.183946	-0.235582	0.366665	-8.01119	-4.1313	-2.81526
+	4.17785	3.73029	Q4MVH8	3254	Leucine--tRNA ligase GN=leuS	29	29	29	48	48	48	91.326	0	205.91	1283300000	139	133480000	305830000	110260000	21476000	30200000	7953300	191940000	360820000	116830000	4519100	0	0	29	29	29	-0.0475932	-0.599281	-0.40048	-0.586472	-0.346752	-1.05153	0.180963	-0.572929	-2.06731	-4.43777	-4.26677	-4.47109
+	2.08504	3.66371	Q4MQ14	2918	Viral enhancin family protein GN=AQ16_2918	41	41	41	35	35	35	167.29	0	209.75	942770000	165	150160000	268300000	114140000	58911000	99101000	24820000	29115000	118230000	75176000	4269100	359640	193830	41	41	41	-0.356125	-0.446637	-0.550668	0.528969	0.275967	0.300096	-2.00868	-1.14294	-2.25571	-4.74888	-2.87533	-2.26188
+	2.92493	3.66123	Q4MMM4	4301	Subtilase family protein GN=AQ16_4301	10	9	9	25.9	24.8	24.8	67.821	0	41.243	114830000	34	14902000	46442000	18275000	16159000	10378000	6713900	1965200	0	0	0	0	0	9	9	10	-3.7338	-3.32678	-3.17049	-1.7413	-2.08983	-2.10512	-3.62915	-7.13494	-5.99602	-6.36693	-4.88268	-5.67032
+	3.96991	3.1699	A0A0B5Z1E5	2391	50S ribosomal protein L2 GN=rplB	21	21	21	65.6	65.6	65.6	30.253	0	323.31	7305800000	265	1060500000	2127000000	1214100000	53940000	85230000	19865000	667190000	940350000	1105500000	32060000	261330	0	21	21	21	2.83206	2.48709	2.74402	0.160449	0.428319	0.63891	1.97211	1.57164	2.06832	-3.05961	-2.54269	-2.67971
+	1.79468	3.16101	Q4MPZ7	2308	Aldo/keto reductase family protein GN=AQ16_2308	8	8	7	38.3	38.3	33.9	31.842	0	145.2	305890000	48	21457000	38300000	18056000	19468000	31237000	3865200	51525000	53183000	65000000	3796200	0	0	7	8	8	-2.65373	-3.28338	-3.06927	-1.26231	-1.50864	-2.09429	-1.61821	-2.14998	-2.0661	-3.8246	-4.26367	-6.25999
+	2.80115	3.14657	A0A0B5ZBP4	1822	Sphingomyelin phosphodiesterase GN=sph	10	10	10	46.8	46.8	46.8	36.946	0	78.499	126170000	47	5642900	29112000	3467400	28743000	33398000	18589000	2246400	0	2475700	2496400	0	0	10	10	10	-4.76794	-4.50678	-5.58603	-0.898683	-1.18433	-1.63287	-4.31963	-4.82806	-4.99346	-4.07587	-3.99139	-5.08834
+	3.04965	3.12134	A0A0B5ZDE7	glyA	Serine hydroxymethyltransferase GN=glyA	20	20	20	56.2	56.2	56.2	45.164	0	100.29	772670000	94	54766000	179970000	84729000	24551000	26697000	10529000	77079000	137460000	171620000	3949700	1235800	90981	20	20	20	-1.37824	-0.950927	-0.855426	-0.714782	-1.1017	-0.902607	-1.02292	-1.53668	-1.0774	-3.43225	-4.58632	-4.06455
+	2.81583	3.02071	A0A0B5ZDR3	spoVG	Putative septation protein SpoVG GN=spoVG	4	4	4	50.5	50.5	50.5	10.934	0	7.9661	25598000	9	0	492290	0	8575100	11036000	4569900	0	0	0	924760	0	0	4	4	4	-6.13039	-4.73809	-5.37574	-2.12622	-2.9041	-2.14076	-4.71382	-6.49635	-6.95242	-6.00328	-5.09828	-5.13167
+	2.90513	2.96299	Q4MKC9	4226	Ribosome-recycling factor GN=frr	13	13	13	58.9	58.9	58.9	20.646	0	177.99	3694600000	147	276650000	543320000	264480000	37340000	48237000	13021000	390130000	1081200000	1034000000	6232300	0	0	13	13	13	0.873084	0.857359	0.473925	-0.693041	-0.742854	-1.72422	1.88853	1.82828	1.79364	-3.74604	-4.07832	-4.22472
	1.26469	2.94554	Q4MPW1	2276	Bacterial extracellular solute-binding s, 5 Middle family protein GN=AQ16_2276	8	8	8	23.5	23.5	23.5	63.744	0	37.964	67933000	20	1919600	2797400	6831500	15584000	21089000	6001800	1124000	11724000	0	861720	0	0	8	8	8	-5.57228	-5.79846	-3.88732	-1.9512	-1.82779	-1.96328	-5.48355	-5.80111	-5.64314	-7.01767	-3.48953	-4.07171
+	2.98896	2.92582	Q4MWF5	1583	S-layer protein GN=ctc	60	60	59	64.5	64.5	63.7	91.697	0	323.31	1815700000	372	1450400	1703500	1465500	413160000	618050000	328650000	2550200	6800600	10636000	269760000	49787000	111690000	59	60	60	-4.32032	-4.99294	-3.33536	2.81306	3.18585	3.85027	-5.39892	-5.90151	-3.24984	0.62649	0.0790028	0.366239
	1.54993	2.90659	Q4MH95	1071	Lysine--tRNA ligase GN=lysS	22	22	22	48.7	48.7	48.7	57.708	0	249.32	1883000000	140	222680000	561200000	361500000	7946600	11780000	4122100	177400000	357010000	177530000	1818400	0	0	22	22	22	0.590544	0.637038	0.795289	-2.02162	-2.5214	-1.51197	0.160284	0.0559391	-0.635164	-6.54666	-4.22251	-4.00558
	0.86904	2.90475	Q4MU97	829	Flagellin GN=AQ16_829	24	10	10	90.1	44.7	44.7	30.241	0	81.63	460240000	48	11729000	25039000	18544000	36414000	66979000	125640000	0	13189000	11749000	144220000	6738800	0	10	10	24	-4.08101	-4.4718	-4.61791	0.122553	-0.296121	2.78253	-4.85065	-5.01724	-5.76335	-1.16125	-0.498234	-4.44581
	1.34483	2.81248	Q4MVY4	pyk	Pyruvate kinase GN=pyk	46	46	46	84.6	84.6	84.6	62.237	0	323.31	9043000000	579	904690000	1753700000	1357800000	215580000	164470000	66340000	1018800000	2379000000	1066800000	90885000	1102200	23855000	46	46	46	2.49776	1.99467	2.59139	1.89744	0.838888	1.44009	2.43853	2.73353	1.70284	-0.320716	-3.26652	-0.673786
	1.44475	2.77149	Q4MHW9	2187	Adenylosuccinate lyase GN=purB	20	20	20	48.5	48.5	48.5	49.988	0	127.27	656710000	105	35552000	118540000	87925000	28976000	29194000	13810000	79457000	112750000	125400000	25101000	0	0	20	20	20	-1.81655	-1.60362	-1.58221	-0.88598	-1.21896	-0.764223	-0.991563	-1.54627	-1.25719	-2.38275	-3.41462	-5.38625
	1.43922	2.75594	A0A0B5Z6I6	4260	Ribonuclease J GN=rnjB	27	27	27	49.6	49.6	49.6	60.933	0	137.22	1441300000	153	171960000	359180000	248500000	47708000	78311000	14101000	130090000	248190000	130660000	12629000	0	0	27	27	27	0.124819	-0.0971182	0.316609	-0.181448	-0.164132	-1.22402	-0.252275	0.0212425	-1.2566	-2.33698	-2.59114	-4.90929
	0.785998	2.72179	Q4MMK5	4283	Acceptor oxidoreductase, beta subunit, pyruvate/2-ketoisovalerate family protein GN=AQ16_4283	6	6	6	28.1	28.1	28.1	31.365	0	34.872	152410000	21	13592000	24312000	13460000	14128000	18239000	3373800	18057000	33726000	12370000	1153300	0	0	6	6	6	-2.70548	-3.41115	-3.45613	-2.0691	-2.49563	-2.26426	-3.13116	-2.83097	-4.99211	-7.81574	-2.30139	-4.87723
	1.00184	2.69013	Q4MGX6	ileS	Isoleucine--tRNA ligase GN=ileS	39	39	39	50.3	50.3	50.3	104.61	0	323.31	2136900000	257	270910000	698980000	248850000	29188000	44524000	9370500	238710000	363560000	145030000	87547000	256080	0	39	39	39	0.730663	0.643757	0.215021	-0.305231	-0.200992	-0.659158	0.475361	0.369642	-0.940431	-0.676872	-3.66603	-4.89287
+	2.25307	2.65524	Q4MGU7	argS	Arginine--tRNA ligase GN=argS	35	35	34	63.7	63.7	63.7	62.487	0	298.63	2202700000	220	213760000	597940000	273840000	31923000	52701000	10103000	285620000	515910000	217920000	2952100	0	0	34	35	35	0.706114	0.840915	0.542753	-0.26431	-0.425981	-1.11941	0.72085	0.580567	-0.528778	-3.86897	-2.47183	-3.43461
	1.48857	2.63928	Q4MQT1	1941	Collagenase family protein GN=AQ16_1941	99	99	96	82.8	82.8	80	109.97	0	323.31	34866000000	2692	2657300000	6137500000	2405300000	6831500000	9402800000	3443200000	240910000	213430000	61044000	1243100000	226740000	2002900000	96	99	99	4.32138	4.13535	3.78414	6.70187	7.14178	6.65863	1.11085	-0.0115781	-2.10676	3.40902	3.36766	5.80775
+	2.64513	2.60709	Q4MM80	1317	3-oxoacyl-[acyl-carrier-protein] synthase 2 GN=fabF	25	25	25	82.3	82.3	82.3	43.716	0	323.31	3193200000	209	221140000	820410000	290070000	19605000	36653000	4849500	337920000	593400000	863910000	5264100	0	0	25	25	25	0.580355	1.25989	0.632295	-0.800029	-1.04441	-1.9188	0.826004	0.250414	1.46634	-4.17138	-3.77978	-3.63335
+	2.56227	2.56648	Q4MWE4	1574	N-acetylmuramoyl-L-alanine amidase family protein GN=AQ16_1574	31	31	31	69.8	69.8	69.8	58.119	0	319.77	1568600000	153	193320000	762410000	361380000	8901000	14034000	4431400	70038000	69197000	79583000	5302100	0	0	31	31	31	0.375734	1.01633	0.786179	-1.58342	-2.60062	-1.72921	-1.17079	-1.9922	-1.60609	-4.98398	-4.26492	-4.36378
	1.32255	2.52324	Q4MRX4	3651	Cys/Met metabolism PLP-dependent enzyme family protein GN=AQ16_3651	8	8	8	26	26	26	41.289	0	136.22	549390000	72	44936000	128170000	69671000	60982000	61917000	31488000	27575000	36974000	55449000	20432000	4083400	7716100	8	8	8	-1.67721	-1.62888	-1.07195	-0.339098	0.0404371	-1.04778	-2.23371	-2.45674	-1.914	-1.34421	-4.10339	-3.46857
	1.69366	2.41744	A0A0B5Z5Y9	4078	Pyruvate dehydrogenase (Acetyl-transferring) E1 component, alpha subunit GN=pdhA	34	34	34	88.4	88.4	88.4	41.441	0	323.31	9687400000	407	839670000	2736500000	1289900000	54734000	61587000	23242000	1000900000	1464000000	2175200000	39108000	0	2610500	34	34	34	2.13709	3.14776	2.2812	-0.251357	-0.43382	-0.0806594	2.43479	2.40427	3.16378	-1.49566	-2.82778	-3.69472
	1.94587	2.31773	Q4MPI5	1370	Isocitrate lyase GN=aceA	9	9	9	23.1	23.1	23.1	46.78	0	46.153	57474000	18	0	0	0	18277000	31702000	5018300	0	0	0	2477000	0	0	9	9	9	-5.20781	-6.90177	-5.62231	-2.24398	-1.05644	-1.90439	-6.26576	-4.25815	-6.46043	-4.01	-3.40936	-4.73864
	1.12037	2.31237	Q4MWF6	1584	S-layer protein sap GN=sap	24	23	23	37.7	36.9	36.9	87.325	0	169.96	186980000	56	4681400	6728300	4895800	21735000	55042000	31036000	2817700	10167000	9344400	33770000	3531600	3235500	23	23	24	-4.50177	-4.08004	-4.7818	-2.27142	-0.908843	0.974711	-5.15426	-4.6402	-5.35184	-3.17212	-2.58814	-3.38241
	0.757155	2.30865	A0A0B5ZFK7	4553	Beta-channel forming cytolysin family protein GN=AQ16_4553	21	21	21	58.7	58.7	58.7	45.709	0	152.4	952720000	110	56237000	310860000	130720000	6784900	11412000	905380	140790000	153500000	141020000	0	0	486720	21	21	21	-1.3627	-0.257836	-1.04068	-1.99889	-2.17532	-3.55586	0.0328877	-1.32342	-1.59184	-7.35487	-2.8796	-4.42156
	1.74664	2.25025	Q4MQP1	1902	Bacillolysin GN=npr	17	17	17	29.9	29.9	29.9	60.828	0	323.31	2426300000	370	12882000	14931000	14282000	661970000	592900000	410540000	26137000	16421000	17942000	413720000	102820000	141700000	17	17	17	-4.397	-5.73866	-5.20909	3.39339	3.36678	4.14384	-3.14203	-6.50292	-5.45428	1.85505	1.95599	0.342224
	1.44721	2.1865	Q4MGS6	652	Deoxyribose-phosphate aldolase GN=deoC	11	11	11	59.2	59.2	59.2	23.397	0	16.166	104370000	14	7517400	15372000	10034000	5821700	7912200	1956800	13904000	16890000	23516000	932700	516380	0	11	11	11	-3.92734	-4.41079	-3.90832	-3.01791	-3.00623	-2.64604	-3.74037	-4.24679	-4.00761	-6.35313	-3.9784	-4.89815
	0.898711	2.17171	Q4MRZ1	3635	Alanine--tRNA ligase GN=alaS	24	24	24	34.9	34.9	34.9	97.488	0	137.61	781160000	116	112500000	242810000	110000000	5977400	10151000	4115500	96416000	155170000	40932000	3084200	0	0	24	24	24	-0.641249	-0.918711	-1.04836	-2.54194	-2.17298	-1.90267	-0.537901	-1.1146	-2.35746	-6.59914	-3.18765	-3.34592
	1.34323	2.11239	Q4MJU8	tkt	Transketolase GN=tkt	35	35	35	70	70	70	72.443	0	323.31	4807600000	323	555530000	1082000000	610990000	43599000	76989000	23549000	577900000	1343400000	419930000	55975000	1415000	16288000	35	35	35	2.00261	1.58075	1.79558	0.146818	0.180426	0.463668	1.6744	2.2227	0.639769	-1.39721	-3.27433	-0.874712
	1.20257	2.09237	Q4MGQ1	2402	DNA-directed RNA polymerase subunit beta GN=rpoB	91	91	91	72.9	72.9	72.9	131.87	0	323.31	13773000000	815	1355400000	3475800000	1796000000	121800000	183080000	58725000	1153200000	2935000000	2424200000	241160000	9587700	18769000	91	91	91	3.20042	3.12004	3.33001	1.42429	1.51875	1.69883	3.00566	3.18041	2.99176	1.07062	-1.18329	-1.52257
	1.06814	2.05582	Q4MPR5	2221	GMP synthase [glutamine-hydrolyzing] GN=guaA	20	20	20	50.3	50.3	50.3	57.578	0	111.29	1028300000	133	66386000	182440000	101740000	16605000	23023000	6045700	103600000	291720000	193450000	43059000	268770	0	20	20	20	-1.12506	-1.34472	-1.18944	-1.48722	-1.65346	-1.24331	-0.591091	-0.572895	-0.802625	-1.89125	-3.67458	-4.98562
	1.47082	2.04218	Q4MS98	1211	SipW-cognate class signal peptide domain protein GN=AQ16_1211	14	14	14	46.2	46.2	46.2	21.574	0	34.353	98030000	30	425250	780610	0	9887500	19398000	14233000	659540	1128800	1913700	46113000	3490900	0	14	14	14	-7.90259	-8.35379	-6.46239	-1.75839	-1.73884	-0.0184483	-5.39948	-7.65858	-6.02012	-2.81314	-3.76906	-3.06002
	1.42349	2.03463	Q4MID3	murA	UDP-N-acetylglucosamine 1-carboxyvinyltransferase GN=murA	23	23	23	65.4	65.4	65.4	46.772	0	323.31	2643700000	188	284530000	1009600000	446810000	19981000	11858000	4391500	165460000	289090000	408240000	3721700	0	0	23	23	23	0.863521	1.32451	1.204	-1.38856	-2.61332	-3.01129	-0.0229235	0.123236	0.69968	-5.10255	-4.46822	-3.54629
	2.57699	1.98743	Q4MMK4	4282	Acceptor oxidoreductase, alpha subunit GN=AQ16_4282	9	9	9	25.5	25.5	25.5	64.441	0	136.8	340550000	56	35979000	40901000	47527000	33798000	22617000	7888500	19192000	109730000	16935000	5980800	0	0	9	9	9	-2.17969	-2.60387	-2.32916	-1.87607	-1.82184	-1.11049	-2.35195	-2.00034	-3.30074	-3.3002	-3.88359	-3.58688
	1.8497	1.9856	Q4MNQ9	3798	Uncharacterized protein GN=AQ16_3798	2	2	2	11.3	11.3	11.3	16.647	0	4.5136	64727000	12	5151900	13283000	8039700	6333300	7136500	3306100	6405200	10347000	565850	4158700	0	0	2	2	2	-4.70068	-4.95038	-4.51996	-2.5225	-3.11001	-2.68946	-5.44103	-5.37367	-4.95795	-5.03485	-3.89073	-5.3532
	1.1759	1.97831	Q4MTL6	4021	Acetyl-CoA acetyltransferase GN=thlA	15	15	15	44	44	44	41.883	0	104.91	320740000	100	2605200	5828800	1334900	97925000	85220000	35513000	2095800	0	2755500	72099000	9938600	5426900	15	15	15	-5.43789	-6.80008	-5.94183	0.180719	0.276753	-0.173613	-5.54035	-5.10946	-5.11714	-0.824692	-1.42337	-3.403
	1.31476	1.97047	Q4MN09;Q4MXU6	4681	Probable transaldolase GN=fsa	17	17	17	87.9	87.9	87.9	23.068	0	279.54	1901400000	185	97800000	179010000	146780000	210150000	198400000	96059000	111810000	303830000	250780000	255480000	33242000	18080000	NaN	NaN	NaN	-0.287326	-0.963292	-0.47897	2.01918	1.6639	2.35514	-0.306371	-0.282135	-0.368502	0.71161	0.718739	-1.30354
	0.503269	1.95675	A0A0B5Z5R8	uvrA	UvrABC system protein A GN=uvrA	15	15	15	17.8	17.8	17.8	106.55	0	28.749	166700000	21	35405000	35973000	17191000	4014300	5964200	4154600	20247000	36814000	6542800	396030	0	0	15	15	15	-2.77625	-3.59336	-3.18323	-2.73488	-3.56337	-2.41095	-2.45946	-2.85101	-3.61187	-8.18939	-3.14258	-3.24748
	1.31536	1.94719	Q4ML70	aroA	3-phosphoshikimate 1-carboxyvinyltransferase AroA GN=aroA	9	9	9	31	31	31	39.998	0	114.07	407290000	49	33246000	80120000	43573000	7649500	17969000	3990100	23078000	70170000	97706000	28608000	1179400	0	9	9	9	-2.57384	-2.73444	-2.30283	-2.05161	-1.76349	-1.32475	-2.34886	-2.58587	-2.1722	-2.59964	-3.50986	-4.87192
	1.31619	1.92789	Q4MSV9	946	Aminotransferase GN=AQ16_946	11	11	11	39.2	39.2	39.2	43.238	0	62.187	319470000	58	24496000	93778000	33127000	11309000	17936000	2972700	27835000	40999000	50937000	16081000	0	0	11	11	11	-2.92767	-2.82031	-2.37567	-2.04342	-1.88143	-2.24229	-2.45627	-2.66141	-2.1851	-2.68094	-4.30919	-4.96068
	0.746827	1.8359	Q4MJI5	galE	UDP-glucose 4-epimerase GalE GN=galE	12	12	12	37.6	37.6	37.6	36.885	0	66.844	662780000	73	30888000	144410000	63231000	30200000	35601000	11392000	58821000	64970000	130260000	88321000	4456600	235750	12	12	12	-1.51018	-1.51103	-1.18771	-0.334905	-1.33509	-1.50532	-1.30945	-2.04982	-1.29172	-0.780205	-3.68825	-4.21455
	2.87417	1.80359	A0A0B5Z4K7	2879	Triosephosphate isomerase GN=tpiA	23	23	23	94.4	94.4	94.4	26.468	0	323.31	7092600000	454	612600000	1416200000	659460000	217240000	221350000	59763000	846050000	1368700000	1543700000	67166000	24723000	55646000	23	23	23	2.18545	1.69592	1.88635	1.84817	1.56024	1.42235	2.22488	2.23796	2.44197	-0.56139	0.0571473	-0.0757873
	0.590204	1.80207	A0A0B5Z363	3747	4-hydroxy-3-methylbut-2-en-1-yl diphosphate synthase (flavodoxin) GN=ispG	15	15	15	50.3	50.3	50.3	40.027	0	43.477	1624300000	51	155740000	386840000	339800000	5407200	1698400	347330	239640000	217850000	275170000	1788400	0	0	15	15	15	0.262351	-0.173927	0.996587	-0.696623	-2.57027	-4.42598	0.123811	-0.483679	0.309397	-5.72764	-2.84091	-4.53055
	0.645187	1.78505	Q4MGD0	2382	50S ribosomal protein L5 GN=rplE	21	21	21	83.2	83.2	83.2	20.165	0	222.04	48865000000	226	4688200000	6368300000	4915000000	6901200000	3228300000	1384800000	5032900000	5568400000	5685600000	4877000000	208750000	6459700	21	21	21	5.03933	4.40779	5.16117	5.06534	5.4551	6.13551	4.9268	4.79342	5.73614	5.43215	4.45485	1.4138
	2.0761	1.77831	Q4MK98	asd	Aspartate-semialdehyde dehydrogenase GN=asd	12	12	12	46.8	46.8	46.8	38.089	0	79.052	618330000	66	27880000	86891000	47314000	6600400	16978000	2560900	102900000	129070000	182510000	14620000	1007200	0	12	12	12	-2.1298	-2.23358	-1.9443	-1.57391	-1.84715	-1.49682	-0.777507	-2.00958	-0.449279	-3.11709	-3.01727	-4.11847
	1.06405	1.69052	A0A0B5ZDP4	aspA	Aspartate ammonia-lyase GN=aspA	22	22	5	52.4	52.4	13.2	52.306	0	146.43	1462500000	134	99264000	273500000	205200000	22273000	24850000	5055200	166640000	296700000	366270000	2696000	0	79712	5	22	22	-0.705719	-0.697359	-0.238597	-1.63752	-1.72699	-2.054	0.323794	0.227286	0.378411	-4.95638	-2.60424	-2.92945
	1.77097	1.68135	A0A0B5ZDF4	3479	Electron transfer flavodomain protein GN=AQ16_3479	8	8	8	26.8	26.8	26.8	34.369	0	24.995	60283000	19	0	0	0	12419000	12644000	6989100	0	2219900	5105500	20647000	257560	0	8	8	8	-5.37003	-5.4443	-5.64878	-1.80255	-2.39945	-1.24274	-4.75907	-5.81729	-4.92882	-3.01458	-3.54373	-3.93048
	0.934124	1.67342	Q4MGP9	2404	50S ribosomal protein L7/L12 GN=rplL	20	20	20	95.8	95.8	95.8	12.517	0	323.31	7254800000	307	745450000	1634700000	1013900000	7732600	7487100	9751200	940230000	2111000000	772320000	5801800	0	6449400	20	20	20	2.11637	1.88632	2.18107	-2.7168	-3.94923	-1.45027	2.18499	2.62755	1.35394	-5.13628	-4.33604	-3.66423
	1.12121	1.66936	Q4MJY6	4347	Iron-containing alcohol dehydrogenase family protein GN=AQ16_4347	10	10	10	39.5	39.5	39.5	42.801	0	47.094	156600000	28	17716000	42708000	361220	2636600	6164900	2121600	10684000	25119000	38133000	10957000	0	0	10	10	10	-4.40994	-4.70234	-4.80544	-2.55224	-2.77257	-1.52097	-4.1154	-4.79311	-3.92143	-3.75786	-3.04984	-5.04615
	2.65273	1.66832	A0A0B5Z796	3540	Ribonuclease PH GN=rph	9	9	9	53.1	53.1	53.1	27.029	0	97.06	378710000	45	9919600	36582000	20991000	8834300	30957000	6186000	47072000	110260000	100860000	6727000	0	317370	9	9	9	-2.73282	-2.62878	-2.9835	-2.42097	-2.1611	-1.66134	-1.65031	-1.71361	-1.6342	-3.5975	-3.75208	-3.89878
	0.404024	1.65426	Q4MN53	1870	Alpha,alpha-phosphotrehalase GN=treC	27	27	27	51	51	51	65.622	0	209.4	1477200000	216	142760000	324560000	159340000	84109000	99360000	36739000	108550000	281100000	114160000	58167000	1716800	66599000	27	27	27	-0.470704	-0.815178	-0.359292	0.531523	0.387331	0.488233	-0.573034	-0.310387	-1.46067	-0.79511	-4.36606	1.60547
	0.672313	1.61265	A0A0B5Z6V1	5106	Polysaccharide deacetylase family protein GN=AQ16_5106	14	14	13	60.4	60.4	56	30.763	0	151.01	2074500000	141	232600000	453990000	173890000	2774500	6497700	2444700	202880000	520990000	478410000	0	0	0	13	14	14	0.208171	0.717477	-0.393768	-4.22766	-4.56959	-2.63278	0.000896955	0.0724432	0.559497	-7.22319	-4.28617	-4.75861
	1.22847	1.59545	Q4MJF6	2133	Alkyl hydroperoxide reductase subunit F GN=ahpF	22	22	22	52.4	52.4	52.4	54.825	0	229.56	1964000000	166	141930000	360610000	302030000	26872000	29820000	10270000	170050000	549930000	329930000	31585000	1590300	9410700	22	22	22	-0.2607	-0.681696	-0.0224725	0.00181706	-0.629952	-0.440747	0.00718334	0.559983	0.205218	-1.94679	-2.95988	-0.948568
	2.68188	1.59297	Q4MNQ6	3801	Aminomethyltransferase GN=gcvT	14	14	14	36.1	36.1	36.1	40.274	0	92.82	378710000	54	44906000	102810000	65047000	12142000	10579000	3990600	27988000	40456000	63150000	7523900	0	115340	14	14	14	-2.04613	-2.32933	-1.76088	-1.80924	-2.12166	-1.44139	-2.14048	-3.05286	-2.14556	-3.50597	-3.16793	-3.47731
	2.38314	1.59174	A0A0B5YZH3	3478	Electron transfer flavodomain protein GN=AQ16_3478	4	4	4	31.9	31.9	31.9	28.19	0	52.264	104010000	18	6836500	10185000	6189600	18616000	15098000	9611800	5527600	6969800	9644300	10113000	5222500	0	4	4	4	-5.302	-5.52058	-4.30443	-2.34585	-2.15407	-1.47833	-6.39319	-6.16753	-4.79285	-3.57101	-3.48714	-3.69532
	1.14159	1.58748	A0A0B5ZDM5	1683	3D domain protein GN=AQ16_1683	58	58	56	88.9	88.9	85.7	43.635	0	323.31	45546000000	1067	3271700000	9724000000	4870200000	3131700	10573000	3773000	7236100000	8300100000	12108000000	3894100	3048000	10591000	56	58	58	4.63833	4.71451	4.81976	-5.22671	-4.08662	-3.19883	5.29934	4.7561	5.55279	-6.33439	-5.44454	-5.49567
	0.610734	1.56223	Q4MH27	2366	50S ribosomal protein L17 GN=rplQ	14	14	14	61.7	61.7	61.7	13.449	0	233.14	4537500000	115	336940000	983450000	481150000	2339900	4295500	4120200	453170000	1215000000	1056500000	602120	0	0	14	14	14	0.905545	1.64592	1.25566	-4.09353	-3.76234	-2.56228	1.85374	2.09627	1.93161	-7.01172	-3.43736	-4.65575
	1.14648	1.50071	Q4MIW8	2169	1-pyrroline-5-carboxylate dehydrogenase GN=pruA	40	40	40	68.3	68.3	68.3	56.21	0	323.31	4020500000	579	144510000	417980000	244320000	796970000	958700000	317110000	82599000	267290000	251680000	377360000	39839000	122090000	40	40	40	0.216443	0.361006	0.412689	3.02464	3.5112	2.45723	-0.279739	0.034737	-0.129985	1.45884	0.590055	2.44204
	1.19442	1.4986	Q4MR40	2987	Glycine cleavage system H protein GN=gcvH	4	4	4	47.2	47.2	47.2	13.987	0	49.542	109720000	47	0	14503000	5910600	8305700	13871000	15188000	4920800	9578100	6869700	20382000	142020	10052000	4	4	4	-5.73073	-4.7253	-4.4012	-2.8614	-2.58905	-1.1239	-5.44913	-4.4775	-4.78384	-3.41914	-3.48621	-4.16482
	0.761091	1.45679	Q4MPZ9	2310	Bacterial extracellular solute-binding s, 5 Middle family protein GN=AQ16_2310	39	34	34	60.6	55.3	55.3	61.201	0	323.31	1759200000	365	0	3538300	18149000	252710000	384370000	170790000	8445200	8670300	4370300	615210000	152460000	140450000	34	34	39	-5.10532	-4.83816	-5.59209	2.24279	2.88611	2.75346	-5.98094	-5.9167	-5.76322	2.12929	1.9246	-0.541902
	0.663179	1.44714	A0A0B5Z657	2405	50S ribosomal protein L10 GN=rplJ	25	25	25	88.6	88.6	88.6	18.037	0	323.31	10279000000	256	1137800000	2476700000	1176400000	5981100	8631300	4784100	1145300000	2545500000	1773700000	4016000	0	0	25	25	25	3.24467	2.76858	2.65197	-3.79635	-3.72758	-1.51824	2.80006	3.10442	2.82162	-5.73037	-3.61192	-4.04131
	1.53372	1.44383	A0A0B5ZB79	gap	Glyceraldehyde-3-phosphate dehydrogenase GN=gap	10	10	10	37.7	37.7	37.7	37.566	0	24.774	79540000	19	14724000	2158900	18902000	12111000	10300000	2384500	841000	2420000	0	15698000	0	0	10	10	10	-4.8724	-7.11501	-6.08372	-1.90478	-3.15774	-1.8873	-6.0449	-2.97355	-6.5754	-3.86795	-3.54379	-3.86957
	2.22928	1.44101	A0A0B5YT91	2397	Elongation factor G GN=fusA	81	81	81	83.1	83.1	83.1	76.324	0	323.31	54452000000	1802	6686500000	14274000000	6682300000	240010000	306740000	121240000	7051500000	14391000000	4470800000	137570000	16870000	72826000	81	81	81	5.47236	5.19543	4.87169	2.09529	2.13842	2.02126	5.19198	5.58757	4.01434	0.506016	0.265607	1.1603
	1.00423	1.41898	Q4MIB2	2711	ATP synthase subunit delta GN=atpH	8	8	8	46.7	46.7	46.7	20.481	0	26.119	250770000	71	14837000	35575000	18208000	15053000	19211000	9375900	20552000	26287000	45776000	32277000	1191700	12426000	8	8	8	-3.73854	-2.94373	-3.19414	-1.66667	-2.17317	-1.3798	-2.83562	-2.47889	-2.79439	-2.0568	-3.21381	-4.20596
	0.548534	1.41158	A0A0B5Z3S2	2515	D-alanyl-D-alanine carboxypeptidase family protein GN=AQ16_2515	11	11	11	31.3	31.3	31.3	48.111	0	26.864	255870000	55	28610000	70193000	24340000	2588200	2072700	3411000	28440000	33905000	60634000	1675000	0	0	11	11	11	-2.80674	-2.93278	-2.6433	-2.51061	-3.48582	-2.95722	-2.89516	-2.75958	-2.61948	-6.59823	-3.18012	-3.41003
	1.09591	1.39246	A0A0B5Z759	3410	Isocitrate dehydrogenase [NADP] GN=icd	19	19	19	45.8	45.8	45.8	46.972	0	40.12	521890000	64	54314000	124100000	90903000	8080100	15062000	3287700	66422000	59463000	84951000	15044000	260610	0	19	19	19	-1.51197	-1.68441	-1.16052	-2.0675	-2.7788	-1.97867	-1.07868	-1.78582	-1.45057	-2.73431	-4.60872	-3.65932
	0.67	1.38657	Q4MKA3	4251	Uncharacterized protein GN=AQ16_4251	3	3	3	31	31	31	13.566	0	17.979	79728000	13	9499700	26798000	22064000	10002000	7865700	0	2642400	857130	0	0	0	0	3	3	3	-3.36787	-3.39893	-2.86712	-2.73006	-3.61416	-5.06801	-4.60069	-4.67558	-5.55452	-6.46761	-4.72027	-4.38406
	0.768798	1.37642	Q4MR51	2997	Cysteine desulfurase GN=sufS	10	10	10	30.5	30.5	30.5	45.269	0	120.58	633610000	81	29721000	96562000	52703000	36745000	24726000	11983000	71547000	104110000	126440000	65324000	0	13752000	10	10	10	-2.30506	-1.9516	-2.01794	-1.14613	-1.46842	-1.27591	-1.47212	-1.25909	-1.12197	-1.13063	-2.9675	-3.92158
	0.685963	1.35167	Q4MIE5	2675	Acetyl-CoA C-acyltransferase family protein GN=AQ16_2675	11	11	11	40.2	40.2	40.2	41.138	0	35.731	211120000	48	0	3982300	0	35019000	59589000	19014000	0	0	0	68316000	6534300	18667000	11	11	11	-5.00172	-5.40251	-5.54712	-0.131883	-0.217627	-1.20188	-5.1555	-5.49655	-4.39459	-0.703777	-3.47076	-1.43188
	1.22059	1.33243	Q4ML36	1823	Phospholipase C GN=plc	21	21	21	67.5	67.5	67.5	32.397	0	323.31	8808000000	574	1124000000	1861300000	935450000	1247800000	1479700000	688250000	74015000	126880000	105450000	904970000	120200000	140030000	21	21	21	2.89962	2.30336	2.35984	4.05699	4.37522	3.98452	-0.708806	-0.542961	-0.799639	2.93957	3.59586	1.884
	0.797148	1.31078	Q4MT24	894	Aldose 1-epimerase family protein GN=AQ16_894	11	11	11	40	40	40	33.193	0	20.891	200480000	35	13433000	39852000	17233000	1911300	2645500	280330	27722000	45430000	51972000	0	0	0	11	11	11	-3.40172	-3.23936	-3.47452	-3.7133	-3.7455	-4.55023	-2.50877	-2.63645	-2.65823	-6.70429	-4.85598	-4.38109
	0.466278	1.28797	A0A0B5Z5U0	4095	GTP-binding protein TypA/BipA GN=typA	37	37	37	64.3	64.3	64.3	68.92	0	323.31	4554600000	345	601470000	1594300000	780420000	10986000	31180000	4396200	398310000	884330000	247350000	1460700	0	381130	37	37	37	2.14753	1.65787	1.95859	-2.04556	-1.4813	-3.0391	1.02517	1.61658	-0.319303	-5.66507	-2.1186	-2.64621
	0.450028	1.25203	A0A0B5Z838	hemL	Glutamate-1-semialdehyde 2,1-aminomutase GN=hemL	11	11	11	35.2	35.2	35.2	46.276	0	69.651	609750000	68	39952000	130800000	96003000	5650100	12887000	1897600	75609000	96121000	150830000	0	0	0	11	11	11	-1.81619	-1.82457	-1.37037	-3.05592	-2.60126	-3.08448	-1.43792	-1.22073	-0.843721	-6.52225	-3.2412	-2.7343
	1.34392	1.24825	Q4MU27	238	Methylmalonate semialdehyde dehydrogenase [acylating] GN=mmsA	6	6	6	17.7	17.7	17.7	53.004	0	29.227	36237000	22	0	1083400	1167500	1916200	11298000	4351400	0	0	0	15694000	0	727070	6	6	6	-6.19265	-7.01886	-5.68742	-3.15708	-3.32483	-2.12058	-5.52119	-5.51559	-5.71521	-3.87861	-3.92064	-4.548
	0.438775	1.23443	Q4MN45	1863	Subtilase family protein GN=AQ16_1863	13	13	13	10.5	10.5	10.5	153.51	0	35.99	102460000	21	1791900	7699300	6771900	23837000	33008000	2377200	0	0	1217800	23309000	2443600	0	13	13	13	-5.58406	-4.32742	-5.46135	-1.77649	-1.76665	-1.29115	-4.96667	-4.13737	-5.30668	-3.54546	-0.515295	-4.47682
	1.27124	1.22555	A0A0B5Z1D7	thrS	Threonine--tRNA ligase GN=thrS	22	22	22	36.1	36.1	36.1	73.953	0	50.789	568540000	70	36129000	121290000	53247000	5260300	13855000	4561900	67389000	178370000	73942000	8462400	0	6030900	22	22	22	-2.00255	-1.80064	-1.89433	-1.67707	-2.78695	-2.02144	-1.34676	-1.09585	-2.12323	-3.70179	-2.76459	-3.69575
	0.910267	1.22397	A0A0B5Z981	660	Hemolytic enterotoxin family protein GN=AQ16_660	41	41	41	89.6	89.6	89.6	43.729	0	323.31	62314000000	2701	4570000000	14575000000	8053200000	10215000000	8570000000	3965200000	620550000	486400000	664020000	4734700000	615890000	5243400000	41	41	41	5.14787	5.37627	5.4401	7.3088	7.03466	6.73634	2.02117	0.861464	1.26869	5.25573	5.14037	7.0118
	0.395239	1.21885	Q4MU96	830	Flagellin GN=AQ16_830	28	19	19	93.2	69.4	69.4	32.704	0	323.31	2398400000	308	79426000	170320000	134130000	162000000	428290000	405420000	72049000	40343000	77069000	615900000	186150000	27290000	19	19	28	-0.925871	-0.881145	-0.545488	1.57802	2.56597	4.01206	-1.22114	-2.21987	-1.37207	2.35602	2.8165	-0.673029
	1.45586	1.20039	A0A0B5ZAI7	2395	30S ribosomal protein S10 GN=rpsJ	12	12	12	73.5	73.5	73.5	11.684	0	235.55	4140300000	158	396330000	1112900000	565820000	11712000	12351000	9822100	337460000	824790000	841130000	18808000	2050400	7055700	12	12	12	1.68445	1.55998	1.56944	-2.71178	-2.86342	-2.27614	1.11292	1.38769	1.77677	-3.1476	-4.05134	-4.25358
	0.471083	1.14047	Q4MWJ5	1622	dehydrogenase family protein GN=AQ16_1622	30	30	30	82.5	82.5	82.5	51.771	0	323.31	3656900000	299	240970000	678100000	349750000	91274000	81279000	27710000	368190000	796460000	857090000	91815000	10486000	63779000	30	30	30	0.646792	0.712385	0.77054	1.04324	0.210728	0.802915	1.1573	1.33161	1.35105	-0.482946	-2.20597	1.32439
	1.43627	1.1385	A0A0B5Z9I6	2401	DNA-directed RNA polymerase subunit beta GN=rpoC	93	93	93	83	83	83	134.39	0	323.31	9490200000	772	960070000	2450400000	1198600000	60302000	94287000	24843000	777260000	2130600000	1637000000	134280000	12675000	9912300	93	93	93	2.60742	2.57293	2.50749	0.538312	0.525452	0.591713	2.21235	2.65762	2.42558	0.105677	-0.716383	-1.14931
	2.30216	1.1308	Q4MSS3	980	GTP cyclohydrolase 1 GN=folE	7	7	7	31.2	31.2	31.2	21.02	0	27.015	303440000	35	23359000	44701000	25669000	12953000	13421000	3674300	30666000	70765000	64983000	13035000	0	214160	7	7	7	-2.70258	-2.97474	-2.95098	-2.0131	-2.22738	-2.47073	-2.11684	-2.30491	-2.55859	-3.46607	-3.06858	-3.56896
	2.30149	1.12776	Q4MIM9	3879	Leucine dehydrogenase GN=ldh	28	28	28	62.6	62.6	62.6	39.881	0	323.31	10111000000	785	596370000	1346700000	741160000	1143000000	1178900000	582040000	657250000	706170000	1133700000	1436500000	180430000	409090000	28	28	28	1.76471	1.65606	2.00808	4.56122	3.99595	4.17021	2.00093	1.40346	2.08186	3.33498	2.96569	3.04344
	0.802677	1.06844	Q4MVT4	3354	Glyoxalase/Bleomycin resistance /Dioxygenase superfamily protein GN=AQ16_3354	7	7	7	74.8	74.8	74.8	15.806	0	37.041	224850000	32	4045000	6484300	5857600	24824000	28101000	12887000	3688900	37333000	13939000	66385000	810750	20489000	7	7	7	-4.96981	-4.06532	-3.38236	-0.858523	-1.0666	-0.327521	-4.50852	-3.25518	-3.54872	-1.44854	-2.94685	-1.06258
	0.291332	1.0253	Q4MM78	fabH	3-oxoacyl-[acyl-carrier-protein] synthase 3 GN=fabH	17	17	17	58.4	58.4	58.4	33.453	0	105.56	838140000	90	80118000	263920000	69576000	7618500	10472000	992890	76571000	151160000	173680000	2434000	0	1603500	17	17	17	-0.810038	-1.03328	-0.894703	-2.2773	-2.1906	-5.04295	-0.738453	-1.04672	-0.879032	-6.22221	-2.57463	-3.7899
	0.88162	1.01649	Q4MTJ4	4042	5-methyltetrahydropteroyltriglutamate--homocysteine methyltransferase GN=metE	29	29	29	41.1	41.1	41.1	87.471	0	242.73	925120000	171	0	1399100	2270600	118000000	197340000	75668000	3660100	0	1456400	337720000	79883000	107720000	29	29	29	-6.58812	-7.23858	-5.62432	1.54268	1.59532	2.17748	-3.94237	-5.55662	-6.06736	1.54394	0.885189	-0.163109
	0.39747	0.971841	A0A0B5YXU3	2858	Thioredoxin reductase GN=trxB	14	14	13	43.4	43.4	41.2	34.669	0	77.577	1023200000	88	101470000	178830000	132130000	7847800	8838700	231300	146660000	175630000	269830000	1750600	0	0	13	14	14	-0.369403	-0.927155	-0.381529	-2.13598	-2.67495	-4.511	-0.380484	-0.675414	0.101636	-5.54895	-3.15457	-3.53393
	0.280148	0.970195	Q4MU99	827	Flagellin GN=AQ16_827	33	33	16	92.4	92.4	39.9	30.08	0	323.31	10622000000	937	367160000	863110000	459620000	536800000	1589700000	1084200000	313760000	400160000	518730000	3165500000	1136600000	186980000	16	33	33	1.49217	1.19071	1.36354	3.46788	4.45437	5.89317	0.907949	0.422686	0.884358	4.4376	5.19703	1.27021
	1.83109	0.955297	Q4MRB2	3055	Probable cytosol aminopeptidase GN=pepA	18	18	18	44.3	44.3	44.3	53.604	0	123.16	792490000	186	16924000	35896000	47018000	114590000	126600000	55081000	35133000	35622000	26280000	188480000	42280000	68581000	18	18	18	-2.95042	-3.31631	-2.52928	0.7154	0.564607	1.18641	-1.86977	-2.75584	-3.22019	0.129294	-0.191228	-0.337535
	0.352979	0.924837	Q4MQQ7	1918	Acetyltransferase domain protein GN=AQ16_1918	6	6	6	44.7	44.7	44.7	19.155	0	29.468	143590000	15	4295000	30692000	990050	1731900	0	531160	37469000	42664000	25215000	0	0	0	6	6	6	-4.67012	-4.00342	-4.9283	-4.32277	-4.48851	-4.56382	-2.03736	-3.12995	-3.94561	-7.5476	-4.12788	-4.47413
	0.346132	0.916883	A0A0B5Z4T5	1060	Peptidase M23 family protein GN=AQ16_1060	27	27	27	61.4	61.4	61.4	46.559	0	323.31	4504600000	223	342030000	1297400000	558370000	11236000	10992000	1271100	572140000	801040000	898920000	11249000	0	0	27	27	27	1.25482	1.96577	1.84756	-2.18949	-2.99371	-4.76696	1.69521	1.32892	1.77533	-5.78032	-3.74965	-3.17084
	1.76388	0.906853	Q4MTF9	4079	Pyruvate dehydrogenase E1 component subunit beta GN=pdhB	28	28	28	81.2	81.2	81.2	35.229	0	323.31	18431000000	585	1749400000	4946900000	2058000000	125320000	106880000	50083000	1934000000	3319300000	3912800000	141230000	23071000	64489000	28	28	28	3.60421	3.77746	3.36699	1.77082	1.00112	1.32473	3.27541	3.60134	3.88592	0.512466	0.337515	0.526129
	0.700516	0.860901	Q4MTF8	4080	Dihydrolipoamide acetyltransferase component of pyruvate dehydrogenase complex GN=pdhC	41	41	41	82.1	82.1	82.1	45.984	0	323.31	8164200000	394	566270000	1896200000	1052000000	8771300	11133000	3925800	1030000000	1781400000	1788800000	20589000	0	5140100	41	41	41	1.82398	2.34156	2.51885	-2.39559	-2.14323	-1.80776	2.54232	2.50976	2.6228	-2.60847	-4.02853	-2.29228
	0.719907	0.855559	Q4MFX5	2700	Glucose-specific phosphotransferase enzyme IIA component GN=crr	14	14	14	83.6	83.6	83.6	17.475	0	323.31	2171800000	116	196350000	375550000	229050000	5354400	17826000	1919700	287960000	563010000	481610000	12831000	0	319950	14	14	14	0.518297	-0.463854	-0.0458199	-2.9601	-2.16247	-3.67445	0.731622	1.00059	0.764595	-3.5314	-3.40152	-4.43079
	0.521623	0.849375	A0A0B5Z697	5636	Uncharacterized protein GN=AQ16_5636	17	17	17	52.2	52.2	52.2	43.666	0	69.742	525420000	79	36867000	126210000	66424000	7888200	15087000	4349900	64802000	76401000	106040000	10808000	1601100	8935200	17	17	17	-2.54992	-1.50796	-1.77672	-2.06041	-2.23348	-1.93864	-1.32561	-2.02616	-1.69268	-2.62474	-4.28022	-1.87571
	1.51844	0.847548	Q4MI94	2416	Glutamate--tRNA ligase GN=gltX	18	18	18	38.4	38.4	38.4	55.616	0	173.7	1395700000	158	89326000	253980000	159840000	25780000	36225000	10905000	197010000	279800000	245490000	86720000	2390700	8219700	18	18	18	-1.18365	-0.79626	-0.484339	-1.02015	-0.668546	-0.135549	-0.0488985	0.0147825	-0.690828	-1.4622	-1.41939	-1.48529
	0.555821	0.828837	Q4MIB1	2710	ATP synthase subunit b GN=atpF	6	6	6	33.9	33.9	33.9	18.96	0	43.676	239820000	34	28910000	55046000	31477000	3122600	3643200	2630100	23965000	44465000	36832000	9726100	0	0	6	6	6	-2.39834	-2.67472	-2.70071	-3.18551	-3.70065	-1.83205	-2.59902	-2.86007	-3.20896	-4.19201	-3.03504	-3.97768
	0.302174	0.793091	A0A0B5ZDM1	531	Transglutaminase-like superfamily protein GN=AQ16_531	38	38	36	81.1	81.1	79	43.705	0	323.31	6045000000	363	681000000	2755000000	1248300000	8406100	7518300	1633200	324740000	427370000	589740000	1367400	0	0	36	38	38	2.27525	2.86561	2.70024	-3.20617	-3.80986	-4.24145	1.16186	-0.275295	1.1557	-6.58624	-3.67828	-3.37222
	0.358944	0.726508	Q4MGW0	4215	Succinate--CoA ligase [ADP-forming] subunit alpha GN=sucD	14	14	14	58.7	58.7	58.7	31.212	0	78.896	357920000	51	21739000	85222000	32904000	4137800	2122500	1200200	22145000	65433000	121810000	1208700	0	0	14	14	14	-2.50817	-2.24111	-2.95288	-2.10773	-3.62143	-2.49624	-3.3607	-2.40315	-2.21392	-4.84015	-3.1054	-2.45938
	0.465875	0.721738	Q4MQF7	2073	Stress response protein SCP2 GN=yceC	4	4	4	21.7	21.7	21.7	21.925	0	25.194	60046000	29	2163500	2679500	3509800	4848100	6111100	3137700	2011900	9604000	9560200	11098000	1991200	3331500	4	4	4	-6.2431	-6.4942	-5.87974	-3.63034	-3.13183	-2.35809	-4.45042	-4.76711	-4.95241	-3.60866	-2.88	-4.79681
	0.338647	0.693644	Q4MWB5	1548	Lipase family protein GN=AQ16_1548	32	32	32	46.6	46.6	46.6	81.835	0	143.34	986870000	136	95167000	244480000	99972000	18962000	38719000	5184200	165020000	185240000	47054000	78915000	735120	7427100	32	32	32	-0.924527	-0.584325	-0.852961	-0.919023	-0.680484	-1.66739	-0.184497	-0.693612	-2.23151	-0.633305	-3.30246	-1.41206
	0.237865	0.683442	Q4MNU8	3763	Glucokinase GN=glcK	13	13	13	48.9	48.9	48.9	34.393	0	102.74	865780000	91	81675000	197550000	93872000	645830	1965100	0	98531000	160530000	225730000	5281000	0	0	13	13	13	-0.595552	-0.914617	-0.55687	-5.57138	-4.70586	-3.80838	-0.777486	-1.18309	-0.182856	-7.34575	-3.9968	-4.7934
	0.145683	0.66846	Q4MPU1	2259	UDP-N-acetylmuramoyl-tripeptide--D-alanyl-D-alanine ligase GN=murF	12	12	12	36.5	36.5	36.5	50.471	0	75.416	323670000	36	34174000	129290000	62072000	0	1269000	1294000	12247000	35791000	47525000	0	0	0	12	12	12	-1.99653	-1.34319	-1.90078	-5.27362	-5.20871	-2.65023	-3.84533	-3.45131	-3.30825	-7.92621	-3.09472	-4.11702
	0.243566	0.666493	Q4MLY6	2853	HPr kinase/phosphorylase GN=hprK	12	12	12	41.1	41.1	41.1	34.584	0	52.894	726740000	87	44476000	141400000	77563000	23507000	24139000	13079000	62734000	85368000	117100000	101090000	17841000	18450000	12	12	12	-1.70648	-1.78469	-1.48125	-0.873712	-1.23035	-0.744361	-1.41715	-1.5929	-1.34005	-0.670934	-0.42429	-3.75268
	0.702101	0.646255	A0A0B5YX30	3404	ATP-dependent 6-phosphofructokinase GN=pfkA	17	17	17	58.3	58.3	58.3	34.308	0	315.09	3019800000	266	203030000	523510000	307730000	89411000	91398000	32145000	247420000	419070000	777160000	217480000	43084000	68398000	17	17	17	0.381789	0.261877	0.408989	0.672331	0.064412	0.0636553	0.64023	0.5398	1.27582	0.307596	-0.49625	-0.949714
	0.177682	0.636915	A0A0B5Z8L4	glpX	Fructose-1,6-bisphosphatase GN=glpX	14	14	14	53	53	53	33.957	0	86.85	1430500000	57	180400000	419160000	235620000	1922800	7925000	240110	47655000	305610000	222530000	1424400	0	7970600	14	14	14	0.359996	0.285765	-0.321369	-5.34339	-1.89294	-4.79468	0.0190762	-0.0781186	-0.068277	-6.32361	-3.6909	-3.92725
	0.914003	0.636735	Q4MGV7	4218	Methylenetetrahydrofolate--tRNA-(uracil-5-)-methyltransferase TrmFO GN=trmFO	16	16	16	58.3	58.3	58.3	48.023	0	148.31	847540000	88	74692000	293220000	120850000	4282900	12869000	1685700	60321000	105840000	169990000	3784400	0	0	16	16	16	-1.17044	-0.083266	-1.00968	-2.70499	-3.3492	-2.53836	-1.38735	-1.38418	-1.08215	-3.86565	-3.50366	-3.13345
	0.430162	0.625541	A0A0B5ZCJ0	mtaD	5-methylthioadenosine/S-adenosylhomocysteine deaminase GN=mtaD	15	15	15	52.2	52.2	52.2	48.853	0	190.19	894890000	120	80402000	194890000	115110000	37596000	29127000	10771000	68092000	131840000	169150000	35106000	1283300	21538000	15	15	15	-1.10418	-1.33186	-1.353	-0.312457	-1.36166	-0.638504	-1.51832	-1.46588	-1.07977	-1.78677	-2.07167	-0.3308
	0.510871	0.615515	Q4MGQ6	2641	Periplasmic binding family protein GN=AQ16_2641	6	6	6	26.9	26.9	26.9	35.379	0	25.316	98420000	29	4564000	13510000	8214500	4911700	7997300	1563100	6411600	10898000	27402000	12949000	0	0	6	6	6	-4.40836	-5.26541	-4.36595	-2.46269	-3.49093	-2.92054	-4.19979	-4.65404	-3.85034	-3.99204	-4.02714	-2.70151
	0.886883	0.60859	Q4MXK9	4769	Thiol-activated cytolysin family protein GN=AQ16_4769	43	43	43	79.5	79.5	79.5	56.702	0	323.31	7989400000	676	846770000	2364300000	1422800000	571270000	688640000	204740000	352080000	323060000	224080000	504930000	150370000	336310000	43	43	43	2.60252	2.62407	2.78215	3.27631	3.2996	2.4978	1.27659	0.412554	-0.0168806	2.06279	2.52229	2.66287
	1.11552	0.60295	Q4MGE2	2632	D-alanyl-D-alanine carboxypeptidase dacA GN=dacA	7	7	7	19.6	19.6	19.6	47.053	0	51.67	249950000	46	6383300	31828000	24233000	15775000	15091000	6193900	23111000	47176000	64995000	15163000	0	0	7	7	7	-3.06596	-3.39481	-3.0932	-2.15843	-2.73398	-2.43575	-2.38191	-2.81691	-2.75576	-3.3523	-2.69121	-3.09349
	0.301064	0.581163	Q4MGD2;Q4MPX5	2287;rpsH	30S ribosomal protein S8 GN=rpsH	17	17	17	97.7	97.7	97.7	14.882	0	266.17	3766400000	152	419280000	1004100000	414060000	5453100	2476500	2424500	310300000	830200000	775690000	2396900	0	0	NaN	NaN	NaN	1.86443	1.72335	1.33028	-3.49194	-4.89402	-3.07977	0.0237344	0.428061	0.155991	-5.44824	-4.23078	-3.53021
	1.23451	0.563548	Q4MQF8	2072	General stress protein 16U GN=yceD	6	6	6	39.2	39.2	39.2	21.058	0	188.43	487170000	62	27543000	41009000	27097000	27143000	27522000	4331000	89688000	91231000	92479000	34685000	7349200	17093000	6	6	6	-2.37023	-3.05257	-2.87514	-1.29546	-1.34229	-0.898188	-1.00301	-1.83418	-1.6184	-2.02119	-1.46135	-1.74403
	0.371557	0.556067	Q4MJ70	4190	Ribulose-phosphate 3-epimerase GN=rpe	8	8	8	50	50	50	23.237	0	25.537	406460000	53	35298000	58960000	35729000	18688000	25954000	8830200	48091000	69119000	59403000	33576000	7879000	4933500	8	8	8	-1.79177	-2.57219	-2.15051	-2.1484	-1.63494	-1.84718	-1.87057	-2.191	-2.10768	-1.99073	-3.63637	-1.67162
	1.24799	0.50811	Q4ML19	1808	Putative nucleic acid binding OB-fold tRNA/helicase-type GN=AQ16_1808	25	25	25	56.3	56.3	56.3	56.058	0	323.31	4609700000	497	103590000	378100000	279860000	524530000	576520000	204300000	457780000	491070000	365850000	715880000	182920000	329310000	25	25	25	-0.204663	0.201975	0.648929	3.46244	2.90741	3.07606	1.5717	0.806037	0.519863	2.59814	2.82695	2.4965
	0.0879523	0.471294	Q4MHE9	158	ABC transporter family protein GN=AQ16_158	2	2	2	3.7	3.7	3.7	66.422	0.0059524	3.652	6765100	5	0	0	186360	1386700	3316500	1875500	0	0	0	0	0	0	2	2	2	-4.92555	-5.52998	-4.40506	-5.33923	-5.22932	-4.2781	-4.24327	-5.53195	-5.48115	-9.14599	-3.90687	-3.20766
	0.84207	0.467185	Q4MK31	1238	2-oxoglutarate dehydrogenase E1 component GN=sucA	9	9	9	15	15	15	106.42	0	27.381	128580000	34	13010000	18184000	6535400	9202100	8879700	2240300	22791000	34632000	3281900	9826600	0	0	9	9	9	-3.85513	-3.24778	-3.71071	-2.68817	-3.18703	-3.1518	-2.70009	-3.37059	-6.15418	-3.77322	-3.09255	-3.56278
	1.03669	0.463953	Q4MH26	2367	DNA-directed RNA polymerase subunit alpha GN=rpoA	19	19	19	46.5	46.5	46.5	34.935	0	276.61	3546500000	231	265650000	858490000	510190000	47665000	47757000	19831000	386800000	532220000	772380000	67398000	12669000	25443000	19	19	19	0.824043	1.02514	0.368872	0.0497213	-0.17747	-0.0171613	0.650846	0.734635	1.53882	-0.817582	-0.138266	-0.580922
	0.126262	0.460962	Q4MQ23	murB	UDP-N-acetylenolpyruvoylglucosamine reductase GN=murB	6	6	6	18.4	18.4	18.4	33.563	0	11.571	57509000	10	9023000	8801900	5222300	0	0	0	3916600	20320000	10225000	0	0	0	6	6	6	-4.26207	-5.11207	-4.33921	-5.47651	-5.94156	-4.77939	-6.21492	-4.46285	-4.98287	-8.29312	-3.87887	-5.40836
	0.180663	0.440555	Q4MGB5	1001	Glutamate dehydrogenase GN=gudB	20	20	20	53	53	53	47.536	0	113.89	1063400000	84	87367000	256240000	138120000	1674000	0	0	124030000	199020000	252980000	1552000	0	2377500	20	20	20	-0.657787	-0.647371	-0.23741	-4.06728	-4.87672	-4.05714	-0.186841	-0.598571	0.039432	-6.54838	-3.91872	-3.8557
	0.0857284	0.435417	A0A0B5ZDL8	4197	Phosphate acyltransferase GN=plsX	4	4	4	17.3	17.3	17.3	35.416	0	15.799	143640000	13	6987700	22334000	13990000	9160700	10014000	13208000	3400400	8234000	17946000	32427000	3815400	2125800	4	4	4	-4.16581	-3.41905	-3.68237	-6.33905	-2.8878	-4.34143	-5.17452	-4.51241	-4.38176	-7.95314	-3.51048	-3.41092
	0.746841	0.410065	A0A0B5Z355;Q4MMM1	2785; 4298	Type I phosphodiesterase / nucleotide pyrophosphatase family protein GN=AQ16_2785	39	39	39	57.5	57.5	57.5	73.46	0	323.31	17827000000	948	1030800000	4680500000	1724700000	139420000	171570000	50888000	1712400000	4038700000	3979000000	161730000	36607000	100230000	NaN	NaN	NaN	2.70414	3.30235	2.95689	1.04926	0.964453	0.892782	3.16256	3.33548	3.41886	0.400314	0.230968	1.04502
	0.183405	0.402543	A0A0B5Z9A3	82	Beta-lactamase GN=penPC	5	5	5	17.6	17.6	17.6	33.657	0	10.384	130520000	10	11696000	21634000	10304000	4026900	3382900	915940	20856000	9327500	29170000	16114000	686360	2402600	5	5	5	-3.47925	-3.75793	-4.3412	-3.21515	-3.65756	-3.3942	-3.51527	-6.37962	-3.0614	-3.02423	-2.97239	-5.47791
	0.314574	0.352914	Q4MKB1	4243	Polyribonucleotide nucleotidyltransferase GN=pnp	41	41	41	63.3	63.3	63.3	78.18	0	323.31	5363500000	486	643640000	1465100000	753170000	183070000	208340000	99306000	559310000	882030000	295530000	131860000	33693000	108440000	41	41	41	1.94098	1.81053	1.70187	1.06977	1.1673	1.32942	1.50667	1.83266	0.344485	0.142421	0.679157	1.68617
	0.315126	0.342312	A0A0B5ZJT5	3514	Uncharacterized protein GN=AQ16_3514	13	13	13	81	81	81	25.751	0	235.32	1011900000	148	50513000	82299000	53686000	77453000	79809000	43741000	89650000	172670000	188250000	102300000	14583000	56986000	13	13	13	-1.214	-1.80966	-1.62363	0.213017	-0.0263048	0.647457	-1.11033	-0.893616	-0.960547	-0.518872	-0.403158	0.729262
	0.101566	0.338295	A0A0B5YYT7	1601	Uncharacterized protein GN=AQ16_1601	18	18	18	20.6	20.6	20.6	126.43	0	135.85	675820000	109	88516000	177030000	127170000	19255000	27632000	5234000	58511000	84766000	25589000	44855000	7400000	9864000	18	18	18	-0.908183	-1.22119	-0.949858	-1.4914	-1.99624	-1.62913	-1.56526	-1.93239	-2.92942	-1.86698	-0.0814955	-4.18317
	0.103396	0.330975	Q4MJH0	2739	Polysaccharide deacetylase family protein GN=AQ16_2739	8	8	8	26.2	26.2	26.2	32.357	0	13.945	154640000	21	8165900	56814000	21306000	3848400	5091400	0	12955000	20915000	24707000	841990	0	0	8	8	8	-3.54352	-3.63982	-3.22693	-3.85706	-3.81955	-4.53292	-3.07972	-3.412	-3.21273	-6.50153	-4.06466	-2.63626
	0.102418	0.320656	A0A0B5Z6R3	2369	30S ribosomal protein S13 GN=rpsM	15	15	15	71.9	71.9	71.9	13.819	0	85.861	2871200000	96	409740000	1026300000	486160000	1865100	380240	1316600	226650000	455360000	262540000	714030	0	141530	15	15	15	1.58039	1.39185	1.50462	-5.47215	-6.18067	-4.69967	0.622779	0.844795	0.138975	-7.71443	-5.44988	-4.15013
	0.394311	0.315329	Q4MWC6	1557	Uncharacterized protein GN=AQ16_1557	31	31	31	60.8	60.8	60.8	65.848	0	208.45	1518900000	323	72879000	128600000	93243000	122520000	145870000	51844000	83053000	149780000	45321000	390630000	40764000	194390000	31	31	31	-0.779497	-1.48842	-0.889621	1.19422	1.06699	1.34126	-0.585769	-0.880621	-2.09363	1.46506	0.32838	0.863031
	0.140092	0.308751	A0A0B5Z591	3713	Protein GrpE GN=grpE	10	10	10	60.6	60.6	60.6	21.614	0	92.008	1297800000	72	50392000	132450000	59423000	12630000	13679000	7121300	167160000	365830000	453740000	8647500	463290	26308000	10	10	10	-1.06079	-1.12962	-1.83882	-1.52816	-2.2317	-1.72149	0.0150027	0.291814	0.714244	-3.28902	-2.49023	-0.62835
	0.0773313	0.306956	Q4MGX3	4158	Pseudouridine synthase GN=AQ16_4158	3	3	3	12.3	12.3	12.3	33.99	0	6.0678	33095000	10	4382900	17626000	5489100	0	0	0	0	0	5597100	0	0	0	3	3	3	-4.93442	-4.77163	-4.51901	-5.60448	-6.10783	-3.89141	-5.30773	-6.37252	-5.02444	-7.94719	-4.50479	-4.07261
	0.153963	0.306887	Q4MQZ3	2947	L,D-transpeptidase catalytic domain protein GN=AQ16_2947	13	13	13	69.9	69.9	69.9	17.046	0	86.762	5745700000	138	622410000	1608100000	666730000	9729000	6970900	1489500	875320000	1172700000	776000000	5714500	0	548590	13	13	13	2.21936	2.13842	2.11081	-2.32688	-4.19168	-4.56794	2.16896	2.00065	1.69612	-4.51842	-3.9031	-3.58563
	0.0840241	0.305584	Q4MQ42	2891	Periplasmic binding family protein GN=AQ16_2891	9	9	9	31.7	31.7	31.7	36.519	0	18.544	85264000	24	4026600	10265000	5923100	3427900	3840600	6122100	8122200	10986000	26886000	4561700	1103400	0	9	9	9	-4.69668	-5.00845	-4.79394	-3.52203	-4.05828	-1.62638	-4.12993	-4.65444	-3.71553	-5.10272	-3.56054	-1.46019
	0.543838	0.300362	Q4MSA5	1206	Immune inhibitor A GN=ina	39	35	33	47.2	44.2	42	86.684	0	323.31	3983600000	566	183020000	397770000	185100000	411930000	369120000	250670000	247670000	375850000	148460000	905740000	230670000	277600000	33	35	39	0.388952	-0.109163	0.1239	2.86936	2.46072	2.9038	0.684577	0.258733	-1.16035	2.66307	2.6213	2.04842
	0.104678	0.274472	Q4MNW0	3751	Superoxide dismutase GN=sodA1	4	4	4	41.9	41.9	41.9	22.664	0	294.86	1274800000	93	76399000	246900000	84128000	14871000	24118000	7476100	62315000	340930000	310570000	68631000	10867000	27584000	4	4	4	-0.749915	-0.633666	-2.32955	-2.33623	-1.84449	-2.68088	-1.51188	0.275042	0.243985	-0.940423	-2.64519	-4.0994
	0.0747122	0.261508	A0A0B5YXA9	3717	Ribosomal RNA small subunit methyltransferase E GN=AQ16_3717	2	2	2	10.8	10.8	10.8	27.698	0	16.132	64588000	13	6101700	5421400	2610700	0	0	0	4042400	23252000	23160000	0	0	0	2	2	2	-4.32089	-5.05057	-5.02635	-4.71504	-6.19783	-3.90953	-5.21786	-4.52321	-4.43931	-7.23778	-4.46676	-3.90238
	0.130911	0.256277	Q4MN98	3129	1,4-dihydroxy-2-naphthoyl-CoA synthase GN=menB	12	12	11	54.8	54.8	52.2	29.583	0	164.68	1167400000	98	113360000	239090000	97430000	2757500	7312400	710000	116100000	296880000	285420000	4960600	3335000	0	11	12	12	-0.228928	-0.488816	-0.521656	-4.14176	-3.17647	-5.13828	-0.323896	-0.0836055	-0.0550883	-4.91638	-3.52354	-4.78542
	0.162765	0.24368	Q4MIF4	2684	Fructose-1,6-bisphosphate aldolase, class II GN=fba	21	21	21	91.6	91.6	91.6	30.673	0	323.31	6469200000	259	546850000	1213300000	702870000	8691600	12726000	5164300	765750000	1487900000	1688000000	19691000	337690	17888000	21	21	21	2.05495	1.69569	1.58848	-2.90606	-3.68819	-3.0911	2.10767	2.349	2.52365	-4.12506	-3.82683	-2.4645
	0.0815003	0.233057	Q4MPF7	1344	Catalase GN=AQ16_1344	16	16	16	43.6	43.6	43.6	55.848	0	250.16	409430000	93	25956000	69082000	25761000	8053500	21640000	4132000	43249000	117160000	36563000	44561000	6576100	6699000	16	16	16	-2.60849	-2.79314	-2.56959	-2.50774	-1.91751	-1.98011	-2.04925	-1.79158	-2.62159	-2.28912	-0.68932	-4.12609
	0.0855764	0.224464	Q4MS63	3565	Valine--tRNA ligase GN=valS	39	39	39	49	49	49	101.66	0	214.39	2399800000	263	196300000	505870000	180910000	47583000	103870000	26120000	365850000	506310000	158290000	240440000	12943000	55349000	39	39	39	0.0709829	0.301388	-0.0833401	0.352437	0.430283	0.248059	0.927585	0.328741	-1.05986	0.965706	-1.73561	1.12729
	0.231634	0.22362	A0A0B5ZFR7	576	Bacterial SH3 domain protein GN=AQ16_576	41	41	41	89.8	89.8	89.8	44.112	0	323.31	64790000000	829	4803800000	14704000000	8515000000	11072000	6186000	466600	10055000000	12902000000	13767000000	19185000	1089900	4504000	41	41	41	5.26226	5.39319	5.68188	-5.29062	-6.28207	-5.44517	5.47086	5.71162	5.87409	-5.64739	-6.3358	-5.70552
	0.0996032	0.163753	Q4MS66	hemL	Glutamate-1-semialdehyde 2,1-aminomutase GN=hemL	12	12	12	41.7	41.7	41.7	46.004	0	133.25	716080000	78	60425000	167220000	124790000	0	2700800	0	95876000	103070000	161840000	0	166200	0	12	12	12	-1.16687	-0.981058	-0.553241	-5.1797	-4.01763	-4.1368	-1.09391	-1.18163	-0.780124	-5.51907	-4.26746	-4.03887
	0.209632	0.136525	Q4MVE8	3226	Phosphoenolpyruvate carboxykinase [ATP] GN=pckA	31	31	31	50	50	50	57.94	0	323.31	2159900000	361	19669000	44698000	27846000	371860000	506100000	182180000	28091000	64324000	34157000	509500000	140420000	231060000	31	31	31	-2.9111	-3.67088	-2.56429	2.52042	2.70657	2.67098	-2.36257	-2.47682	-3.3018	2.01989	2.83941	2.6291
	0.0200067	0.0666885	Q4MMK1	4279	YmdB-like family protein GN=AQ16_4279	10	10	10	44.7	44.7	44.7	29.084	0	69.618	321160000	53	53560000	100880000	50808000	1903100	505940	207200	27779000	41666000	42874000	975830	0	0	10	10	10	-1.33204	-2.11092	-2.04919	-3.17462	-5.8924	-4.80408	-2.64014	-2.30074	-2.14917	-6.23695	-3.73804	-4.09617
	0.0632047	0.0426269	Q4MJW7	4367	Glutamine synthetase GN=glnA	32	32	32	66.4	66.4	66.4	50.117	0	323.31	14803000000	680	983580000	3064000000	1493300000	573450000	461790000	263330000	1263500000	2340800000	2872400000	1012800000	125580000	348000000	32	32	32	2.81222	3.07506	3.20152	3.25644	2.85108	3.19319	2.94474	2.88041	3.39351	2.89185	3.45148	2.82949
	0.0195577	0.0294065	Q4MT71	851	Flagellar hook-associated protein 1 GN=flgK	13	13	13	43.5	43.5	43.5	48.288	0	66.582	330450000	44	24620000	110350000	43654000	2635400	6162900	919470	55471000	21842000	59365000	4331400	0	1104700	13	13	13	-2.1284	-1.72934	-1.85871	-2.96394	-3.74464	-4.27254	-1.96998	-3.30013	-2.41872	-4.16608	-3.06704	-3.83622
	0.00628523	0.0277011	A0A0B5ZGG6	553	Cell envelope-related function transcriptional attenuator common domain protein GN=AQ16_553	14	14	14	38.7	38.7	38.7	37.44	0	34.701	554220000	60	49343000	124430000	51761000	0	0	0	53393000	162370000	112910000	0	0	0	14	14	14	-1.67867	-1.81784	-1.82303	-5.63237	-5.53539	-4.80731	-1.4143	-1.07047	-1.16023	-8.03274	-4.83815	-3.18728
	0.00433499	0.0137688	Q4MNH3	4452	Aconitate hydratase GN=acnA	31	31	31	39	39	39	98.995	0	235.44	1375100000	230	123940000	265460000	95898000	56344000	100320000	8816800	132340000	235930000	51590000	81019000	5694800	217730000	31	31	31	-0.129223	-0.637232	-0.648229	0.652131	0.373923	-0.869481	-0.0907593	-0.705738	-1.9623	-0.543123	-1.19815	1.85654
	0.000391062	0.000395099	Q4MSS7	976	Nucleoside diphosphate kinase GN=ndk	10	10	10	50.7	50.7	50.7	16.615	0	84.235	1995200000	206	50743000	75640000	79274000	285350000	364500000	88392000	23310000	45140000	36105000	695520000	97053000	154130000	10	10	10	-1.32088	-1.88863	-1.26007	2.60198	2.30272	1.70902	-2.69616	-1.92809	-2.58072	2.45491	2.34614	1.81149
	0.00916622	-0.0273114	Q4MVD8	3215	WxL domain surface cell wall-binding family protein GN=AQ16_3215	65	65	65	72.9	72.9	72.9	96.029	0	323.31	4404400000	372	194100000	449820000	223540000	1869800	9226500	895390	1250000000	1621600000	618120000	31648000	3310700	262040	65	65	65	-0.0609807	-0.206638	-0.23952	-5.69838	-4.6207	-4.21394	3.4424	2.09474	1.02845	-3.49421	-4.48642	-6.47046
	0.0247365	-0.0389567	Q4MP62	5229	Probable manganese-dependent inorganic pyrophosphatase GN=ppaC	24	24	24	87.4	87.4	87.4	33.707	0	323.31	1929200000	249	72537000	281360000	129220000	61404000	68496000	26921000	212300000	387820000	457570000	117420000	45675000	68531000	24	24	24	-0.933325	-0.868921	-0.745598	0.23721	-0.324987	0.523815	0.306057	-0.0978974	0.317583	-0.14303	1.10079	-0.404857
	0.0185434	-0.043123	A0A0B5Z7U9	metG	Methionine--tRNA ligase GN=metG	28	28	28	41.1	41.1	41.1	75.292	0	166.16	1468900000	125	125150000	304750000	153640000	8630600	12253000	2336100	168400000	522130000	116350000	31885000	6690600	16709000	28	28	28	-0.086316	-0.197511	-0.458797	-2.68834	-2.71322	-3.99017	0.682765	0.430573	-1.43198	-1.96936	-4.1959	-3.09711
	0.0784621	-0.0520571	Q4MHA3	2334	Glutamine--fructose-6-phosphate aminotransferase [isomerizing] GN=glmS	32	32	32	59.5	59.5	59.5	65.735	0	323.31	5729900000	522	357620000	672300000	675390000	402420000	363240000	204900000	561940000	949690000	381540000	743060000	153280000	264550000	32	32	32	1.45944	0.870381	1.8775	2.82905	2.41773	2.93287	1.71986	1.66749	0.523071	2.59993	2.61137	3.12452
	0.0257255	-0.0555641	A0A0B5ZG08	1411	Uroporphyrinogen decarboxylase GN=hemE	3	3	3	10.6	10.6	10.6	39.314	0	17.907	213480000	26	25302000	56559000	33952000	8224400	11418000	1474500	15130000	25544000	23317000	12564000	0	0	3	3	3	-2.84132	-3.09217	-2.61009	-2.44807	-2.89644	-4.68632	-2.94666	-3.232	-2.77976	-2.92759	-3.73521	-3.20134
	0.0148408	-0.0642092	Q4MPU8	2265	4-hydroxyphenylpyruvate dioxygenase GN=hppD	13	13	13	40.1	40.1	40.1	42.103	0	91.089	170350000	43	0	0	0	7900600	12822000	2026200	0	0	1128600	130690000	9194700	6587900	13	13	13	-5.74484	-6.38884	-5.86262	-1.78937	-2.14908	-3.00006	-5.12239	-6.33827	-6.80527	0.0512295	-2.0548	-4.7423
	0.0503792	-0.0690465	Q4MN23	1842	Bacterial extracellular solute-binding s, 5 Middle family protein GN=AQ16_1842	42	42	42	61.3	61.3	61.3	66.628	0	323.31	2769900000	467	150920	2006700	1569100	363220000	485630000	181110000	1420900	1395800	2079600	1372000000	192960000	166430000	42	42	42	-5.42901	-6.42104	-6.01145	2.68041	2.62569	3.19572	-4.67646	-6.27498	-5.96101	3.18346	3.47462	2.05088
	0.0586336	-0.0858889	Q4MGW1	4214	Succinate--CoA ligase [ADP-forming] subunit beta GN=sucC	13	13	13	47.4	47.4	47.4	41.634	0	73.129	306280000	49	22990000	84108000	51532000	3307900	2337000	1759700	21567000	45193000	69439000	4046900	0	0	13	13	13	-2.64193	-2.35313	-1.9232	-3.27577	-4.29488	-3.00579	-2.12507	-3.11962	-2.16358	-4.018	-3.39149	-2.90929
	0.0227067	-0.101347	Q4MLU9	2589	Glycosyltransferase like 2 family protein GN=AQ16_2589	5	5	5	20.1	20.1	20.1	37.042	0	15.207	106780000	14	14479000	45847000	13324000	0	0	0	7463100	14503000	11158000	0	0	0	5	5	5	-3.41626	-3.16859	-3.12884	-5.49656	-4.93789	-5.93084	-5.67762	-4.45244	-3.87902	-8.24626	-3.52841	-4.28658
	0.0752525	-0.102254	Q4MNP5	4391	N-acetylmuramoyl-L-alanine amidase family protein GN=AQ16_4391	34	34	31	57.9	57.9	54.8	64.058	0	213.26	2150200000	176	212000000	604760000	287090000	8131400	11077000	2555600	260210000	398740000	348260000	17392000	0	0	31	34	34	0.935146	0.733155	0.604042	-2.30363	-2.93346	-3.48639	0.593432	0.529289	0.326065	-2.32845	-3.44793	-2.64035
	0.0345146	-0.103425	Q4MPP8	1431	Foldase protein PrsA GN=prsA1	9	9	9	37.8	37.8	37.8	32.685	0	68.403	162720000	31	14887000	48737000	36658000	422390	2466400	594870	12042000	18367000	25311000	3230100	0	0	9	9	9	-3.31105	-2.99738	-2.69187	-5.43624	-4.27304	-4.80852	-3.76457	-3.78718	-2.90715	-6.647	-3.81175	-3.74877
	0.0257879	-0.104222	Q4MT86	836	Flagellar hook protein FlgE GN=AQ16_836	12	12	12	37.7	37.7	37.7	43.202	0	52.464	225440000	53	14481000	63941000	8587100	4058800	12314000	11511000	3758200	22111000	30378000	45876000	8419200	0	12	12	12	-3.26689	-2.87926	-3.88732	-3.02969	-3.1602	-1.29493	-4.36247	-3.2283	-3.02957	-1.70531	-0.717241	-4.74961
	0.035497	-0.112411	Q4MS46	3582	GTPase Obg GN=cgtA	11	11	11	40.4	40.4	40.4	47.21	0	52.925	288050000	43	41603000	138730000	49732000	0	468030	0	16817000	3093200	37605000	0	0	0	11	11	11	-2.021	-1.78634	-1.75366	-4.82761	-6.495	-4.70948	-3.03254	-5.76387	-2.56707	-7.02137	-4.12093	-4.55257
	0.018751	-0.113091	Q4MVZ0	3411	Malate dehydrogenase GN=mdh	10	10	10	48.4	48.4	48.4	33.497	0	44.731	748080000	46	9812000	172660000	128220000	14239000	15097000	21240000	24675000	88734000	101490000	68174000	8035800	95708000	10	10	10	-3.77146	-2.84374	-3.51906	-0.61009	-1.07246	-2.36332	-3.006	-1.918	-1.53063	-1.92928	-4.18774	2.41043
	0.0307021	-0.118083	A0A0B5Z2R3	1137	Ribonucleoside-diphosphate reductase GN=AQ16_1137	9	9	9	28.2	28.2	28.2	43.26	0	48.975	319770000	25	18236000	29063000	20266000	0	0	219090	58529000	149250000	41617000	2591800	0	0	9	9	9	-2.25873	-2.92545	-2.45662	-5.63247	-5.27257	-4.72405	-1.56283	-1.44903	-2.63091	-7.57976	-3.42199	-4.2731
	0.0833633	-0.122621	Q4MR60	3007	Lipoyl synthase GN=lipA	19	19	19	60.1	60.1	60.1	33.701	0	56.685	579360000	70	63265000	141170000	69228000	3078800	3173600	298060	66603000	103530000	109390000	19621000	0	0	19	19	19	-1.38768	-1.43506	-1.12864	-3.60894	-3.97525	-4.78763	-1.19965	-1.5858	-1.53147	-3.23721	-4.48905	-4.27769
	0.0532101	-0.131486	A0A0B5YXC3	2384	50S ribosomal protein L14 GN=rplN	16	16	16	74.6	74.6	74.6	13.12	0	144.82	4475200000	199	405100000	1042800000	501710000	3216200	1951500	3596600	429040000	992920000	1094800000	0	0	0	16	16	16	1.21997	1.58675	1.37043	-4.68135	-5.70937	-4.20779	1.66296	2.06613	2.06084	-6.103	-3.62753	-4.47352
	0.190943	-0.143898	Q4MLH3	2552	Adenylosuccinate synthetase GN=purA	30	30	30	71.6	71.6	71.6	47.467	0	323.31	3081400000	373	179840000	875690000	318550000	124790000	173940000	68658000	137490000	256510000	402100000	402040000	58080000	83723000	30	30	30	0.0914746	0.598989	0.589928	1.39342	1.25936	1.809	-0.175981	-0.419599	-0.0472104	1.26986	2.07615	1.54747
	0.0933806	-0.146152	Q4MQ54	2880	2,3-bisphosphoglycerate-independent phosphoglycerate mutase GN=gpmI	22	22	22	53.4	53.4	53.4	56.352	0	235.7	2513100000	231	146760000	312940000	271380000	59512000	64346000	27878000	385960000	577090000	346340000	194850000	51193000	74827000	22	22	22	-0.00575284	-0.417096	0.480268	0.785313	-0.062085	0.999801	0.995617	0.555386	-0.239002	0.425166	1.61347	0.122845
	0.0516694	-0.148393	Q4MLG6	2545	30S ribosomal protein S6 GN=rpsF	8	8	8	69.8	69.8	69.8	11.299	0	89.211	563860000	37	39342000	164960000	54695000	317770	1496700	396940	66110000	128050000	108490000	0	0	0	8	8	8	-1.81398	-1.72927	-1.68776	-6.33672	-4.35634	-5.54942	-0.875722	-1.18122	-1.19921	-6.87061	-4.45704	-4.46965
	0.112811	-0.161826	A0A0B5YUB0	3480	Thioredoxin GN=trxA	4	4	4	41.3	41.3	41.3	11.478	0	11.688	30518000	19	506930	6043200	0	3598600	2636900	1171500	4132600	5375700	2098300	4633900	0	319920	4	4	4	-6.25155	-5.92992	-5.52618	-3.76809	-4.90418	-3.85161	-5.04253	-5.24586	-6.5414	-4.74455	-3.55183	-3.74203
	0.203126	-0.172094	Q4MNQ5	3802	Probable glycine dehydrogenase (decarboxylating) subunit 1 GN=gcvPA	18	18	18	44.7	44.7	44.7	49.449	0	181.66	1352700000	199	34400000	106230000	34416000	186790000	244460000	78350000	17490000	29425000	57474000	306060000	73797000	183770000	18	18	18	-1.78731	-2.06655	-1.598	1.79582	1.46273	1.63093	-2.20146	-2.5414	-2.26273	1.1958	1.97333	2.23664
	0.338206	-0.173909	Q4MN67	1883	Pyridoxal phosphate-dependent acyltransferase family protein GN=AQ16_1883	21	21	21	65.4	65.4	65.4	43.106	0	282.15	1374800000	217	38298000	111820000	65781000	105980000	132590000	36241000	72079000	122590000	167640000	316330000	54537000	150910000	21	21	21	-1.61672	-1.68639	-1.04349	1.32282	0.758057	0.745213	-0.925694	-1.38203	-1.02294	1.14808	1.2606	0.939133
	0.131	-0.192448	Q4MGA4	4481	Bacterial extracellular solute-binding s, 5 Middle family protein GN=AQ16_4481	26	24	22	48.7	45.5	40.7	63.642	0	169.13	508740000	125	0	5783000	503130	52145000	108820000	40189000	0	529960	0	209030000	52369000	39368000	22	24	26	-5.0922	-3.33401	-5.04426	0.422608	0.309562	0.650699	-5.9192	-5.52006	-5.71158	0.941541	1.39403	-0.375361
	0.142946	-0.193994	A0A0B5YXZ4	2407	50S ribosomal protein L11 GN=rplK	17	17	17	63.8	63.8	63.8	14.975	0	323.31	10834000000	252	1092000000	2568300000	1168900000	4223300	4912900	1107900	1014200000	3189400000	1786300000	4983500	0	0	17	17	17	3.11529	2.79425	2.36967	-4.51539	-4.86944	-5.27673	2.68173	3.30944	2.73884	-5.5371	-4.55532	-3.98715
	0.141058	-0.196886	Q4MX39	4932	Hemolysin BL-binding component GN=hblA	38	38	38	69.9	69.9	69.9	41.75	0	323.31	19617000000	920	2476100000	9427900000	4497300000	454030000	526320000	153260000	258930000	232580000	345190000	663220000	79572000	502660000	38	38	38	4.06655	4.48697	4.24491	2.81733	2.78998	1.88342	0.826141	-0.332512	0.349537	2.43777	2.13617	3.50746
	0.038626	-0.202568	Q4MGX7	4154	Septum site-determining protein divIVA GN=divIVA	4	4	4	23.2	23.2	23.2	19.744	0	13.142	138740000	25	10403000	17204000	6187100	0	1315400	0	17436000	43569000	41911000	713380	0	0	4	4	4	-3.682	-3.80454	-3.6861	-6.12852	-7.81048	-3.49777	-3.32212	-3.55181	-3.25842	-8.13538	-4.38107	-4.31261
	0.0546549	-0.211306	Q4MWE5	1575	Deblocking aminopeptidase GN=AQ16_1575	11	11	11	38.1	38.1	38.1	38.822	0	51.966	175020000	40	548310	4438200	2559800	13072000	13047000	8743200	2641900	3217100	12853000	111800000	2104500	0	11	11	11	-6.29027	-6.19416	-5.85683	-1.73578	-3.7857	-2.05645	-5.70617	-5.40832	-5.06947	0.0250008	-3.37907	-3.58994
	0.0496358	-0.216375	Q4MS48	3580	50S ribosomal protein L27 GN=rpmA	11	11	11	58.3	58.3	58.3	10.505	0	54.163	944210000	47	56943000	124430000	80891000	1811000	977620	0	140370000	270410000	267640000	736200	0	0	11	11	11	-1.27311	-0.70491	-0.973125	-3.07674	-7.11395	-4.63742	-0.527135	-0.448303	0.257755	-6.34847	-3.1429	-4.68762
	0.0808675	-0.222808	Q4MK97	4258	Aspartokinase GN=AQ16_4258	6	6	6	21.7	21.7	21.7	44.22	0	11.698	64242000	11	1938300	15551000	14540000	0	0	0	8847300	12245000	11120000	0	0	0	6	6	6	-4.80813	-4.7267	-6.47861	-5.77508	-5.8866	-5.32261	-4.09117	-4.76766	-4.08896	-7.33114	-4.23814	-4.74658
	0.0580657	-0.237814	Q4MI19	2473	Bifunctional protein GlmU GN=glmU	13	13	13	39.9	39.9	39.9	49.447	0	50.535	318400000	38	15848000	107730000	31591000	814910	3354100	683000	24708000	56708000	74640000	2324500	0	0	13	13	13	-3.31083	-2.28241	-2.62788	-4.30065	-4.16166	-5.03753	-2.44256	-2.24852	-2.08342	-7.04322	-2.8554	-2.88778
	0.180709	-0.241991	Q4MWG9	1597	LPXTG cell wall anchor domain protein GN=AQ16_1597	14	13	13	16.9	16.9	16.9	107.62	0	177.43	527650000	94	46978000	134750000	64947000	43831000	49299000	16229000	31336000	18422000	15635000	71364000	17231000	17627000	13	13	14	-1.64381	-1.88542	-1.86969	-0.361529	-0.674089	-0.989227	-2.77271	-3.22513	-4.06988	-0.923029	0.519385	-0.895228
	0.0775678	-0.268398	Q4MI66	549	Polysaccharide deacetylase family protein GN=AQ16_549	6	5	5	32.6	28.2	28.2	30.82	0	15.057	238970000	23	16494000	56081000	20974000	553160	4126700	0	6464400	79734000	54546000	0	0	0	5	5	6	-3.72541	-3.62173	-3.67764	-5.79102	-4.66068	-5.73754	-3.08003	-2.38902	-2.49346	-7.38999	-3.53936	-4.45469
	0.0625525	-0.27005	Q4MVL3	3288	Dipeptidase family protein GN=AQ16_3288	10	10	10	32.5	32.5	32.5	51.266	0	43.7	267350000	37	11594000	44858000	21215000	10156000	30295000	3534500	20737000	44796000	20509000	57103000	2555800	0	10	10	10	-2.35667	-3.11701	-2.91218	-1.25437	-2.47731	-5.63805	-2.62773	-2.72055	-2.84844	-1.91593	-2.33587	-4.30778
	0.109375	-0.277435	Q4MJH2	2741	Cell shape determining, MreB/Mrl family protein GN=AQ16_2741	8	8	8	28.2	28.2	28.2	35.834	0	14.98	85603000	17	11630000	35890000	13298000	0	0	0	8007100	6037900	10740000	0	0	0	8	8	8	-3.54086	-4.01848	-4.06154	-5.13963	-6.49977	-5.47454	-3.34719	-4.23671	-4.64151	-7.0463	-4.85332	-4.38202
	0.395259	-0.27774	Q4MVP1	3314	Thermophilic metalloprotease family protein GN=AQ16_3314	19	19	19	50.9	50.9	50.9	41.807	0	211.26	1229000000	237	25725000	102280000	54671000	110190000	89111000	42457000	69106000	90845000	156850000	198640000	71527000	217570000	19	19	19	-1.78452	-1.41989	-1.18587	1.28654	0.545815	1.05492	-0.381478	-1.19999	-0.578942	1.02033	1.64091	1.05925
	0.343976	-0.287615	Q4MMZ8	3897	Peptidase M20/M25/M40 family protein GN=AQ16_3897	16	16	16	46.5	46.5	46.5	39.568	0	158.45	853040000	132	29598000	93165000	83909000	32337000	32341000	10968000	72801000	121710000	209880000	113580000	17560000	35188000	16	16	16	-1.71781	-1.75525	-1.24908	-0.416936	-1.07911	-0.0321622	-0.834994	-1.5914	-0.931948	-0.483369	0.0763389	-0.25833
	0.0628392	-0.288835	A0A0B5ZA34	2454	Type III pantothenate kinase GN=coaX	4	4	4	21.8	21.8	21.8	29.093	0	38.77	177280000	25	16576000	32717000	4998900	0	0	108930	24835000	47472000	50570000	0	0	0	4	4	4	-3.27648	-3.70331	-3.02556	-6.81781	-5.46768	-4.8022	-3.12946	-2.49216	-2.34386	-8.34916	-3.60957	-4.26245
	0.190118	-0.289975	Q4MKC0	4234	Transcription termination/antitermination protein NusA GN=nusA	24	24	24	77.2	77.2	77.2	41.149	0	174.18	1540000000	144	105580000	391710000	134810000	1100200	988920	824710	184750000	303700000	415240000	253310	420930	652660	24	24	24	-0.460667	-0.114537	-0.121254	-6.14297	-5.47143	-4.59465	0.221766	-0.0919953	0.361423	-5.81622	-4.54026	-4.98263
	0.420348	-0.301627	Q4MQ53	2881	Enolase GN=eno	40	40	40	85.6	85.6	85.6	46.404	0	323.31	35038000000	1293	2128100000	7090300000	3474700000	683110000	787100000	357080000	3943200000	6206900000	8014800000	1438900000	203020000	710270000	40	40	40	3.85086	4.1818	4.07493	3.2056	3.25431	3.36811	4.56352	4.32139	4.81457	3.36447	3.19471	4.17373
	0.096617	-0.303399	Q4MGD4	2378	50S ribosomal protein L18 GN=rplR	12	12	12	80	80	80	13.106	0	45.494	739130000	43	50501000	113330000	68830000	0	656540	269600	53837000	150460000	301250000	0	0	0	12	12	12	-1.54432	-2.20823	-1.54019	-5.39575	-4.94043	-5.29583	-1.13811	-0.720417	0.286312	-7.12969	-3.63074	-3.96139
	0.0735135	-0.318422	Q4MT73	849	Flagellar hook-associated protein 2 GN=AQ16_849	21	21	21	57.2	57.2	57.2	51.147	0	90.786	569960000	66	38720000	187150000	84376000	2012100	6132300	1219500	79468000	88547000	78053000	1390200	2240700	652100	21	21	21	-2.20635	-1.13094	-1.18267	-6.48815	-3.51093	-3.05407	-0.860102	-2.50381	-2.1566	-5.84003	-2.12822	-4.12963
	0.106882	-0.348866	Q4MX38	4933	Hemolysin BL-binding component GN=hblA	18	18	18	32.6	32.6	32.6	52.389	0	98.196	1006500000	87	153890000	603470000	228950000	0	1055900	0	0	7709000	11472000	0	0	0	18	18	18	0.401531	0.691509	0.456925	-4.90809	-5.64447	-5.89281	-4.62637	-5.81777	-5.02082	-7.40829	-4.12664	-3.86384
	0.110166	-0.35389	Q4MJI1;Q4MM27;Q4MM28	2749; 2818	UDP-N-acetylglucosamine 2-epimerase GN=AQ16_2749 ; UDP-N-acetylglucosamine 2-epimerase GN=AQ16_2818	16	16	16	59.6	59.6	59.6	41.609	0	151.26	856360000	74	64362000	263700000	127070000	417800	1696700	200290	47724000	108200000	242690000	298250	0	0	NaN	NaN	NaN	-0.55484	-0.472533	-0.693821	-5.7734	-3.96479	-6.28741	-0.719825	-1.67972	-0.859295	-6.73733	-4.63232	-3.59429
	0.0984288	-0.35696	A0A0B5Z3L3	2386	50S ribosomal protein L29 GN=rpmC	7	7	7	63.6	63.6	63.6	7.768	0	66.284	933430000	39	48336000	213510000	89483000	2630900	6308800	1496100	143530000	256040000	167700000	4380600	0	0	7	7	7	-1.18944	-0.703703	-1.2692	-5.4345	-2.54652	-5.99498	0.254247	-0.419207	-0.768457	-5.77969	-3.48576	-3.63968
	0.0915257	-0.366033	Q4MX40	4931	Hemolytic enterotoxin family protein GN=AQ16_4931	22	22	22	60.6	60.6	60.6	38.214	0	323.31	1729400000	100	264470000	1143500000	304670000	0	387890	0	11934000	0	4445300	0	0	0	22	22	22	0.946202	1.57341	1.04164	-4.33086	-6.73988	-4.79889	-4.72372	-4.78704	-6.31191	-6.84637	-2.66264	-5.26253
	0.0944291	-0.388547	Q4MI92	2414	Cysteine--tRNA ligase GN=cysS	10	10	10	26.9	26.9	26.9	53.921	0	31.396	226000000	27	15390000	50041000	24860000	1332300	0	371270	30013000	45362000	58631000	0	0	0	10	10	10	-2.80778	-3.12327	-2.52735	-4.89477	-7.065	-4.02894	-2.09726	-2.92874	-2.40108	-6.54718	-5.58738	-2.6885
	0.111715	-0.390383	Q4MJ82	3847	Acetyl-CoA carboxylase, biotin carboxyl carrier protein GN=accB	5	5	5	35.2	35.2	35.2	17.864	0	40.684	263910000	33	31985000	45012000	35699000	0	0	0	29353000	59839000	62017000	0	0	0	5	5	5	-2.32071	-3.14145	-2.23738	-5.09287	-5.29242	-5.91287	-1.66811	-2.13054	-2.21656	-7.38704	-4.57825	-3.16172
	0.0981555	-0.396305	A0A0B5YR41	994	Cytidylate kinase GN=cmk	6	6	6	32.4	32.4	32.4	25.259	0	12.093	175210000	17	17478000	28902000	18946000	0	0	630160	26915000	42607000	39738000	0	0	0	6	6	6	-2.39949	-3.67587	-2.9142	-5.36729	-6.39896	-4.90129	-2.74986	-3.13816	-3.19144	-7.91427	-3.75481	-3.80953
	0.0968186	-0.39997	A0A0B5ZHL0	2398	30S ribosomal protein S7 GN=rpsG	16	16	16	69.9	69.9	69.9	17.884	0	277.01	9096000000	263	1233700000	2640500000	1571500000	453170	4643900	618440	687550000	1594800000	1360500000	1803100	0	0	16	16	16	3.04805	2.83071	3.01321	-6.41812	-3.72227	-5.79946	1.67887	2.294	2.16177	-7.27217	-3.10753	-4.36023
	0.160759	-0.412581	Q4MVR9	tyrS	Tyrosine--tRNA ligase GN=tyrS	14	14	14	44.5	44.5	44.5	46.991	0	94.183	489230000	58	34746000	151480000	45926000	2008700	0	760480	39651000	105830000	108830000	0	0	0	14	14	14	-1.96087	-1.19059	-1.93945	-4.81295	-5.70996	-5.40168	-1.80823	-1.8572	-1.35872	-6.7144	-4.29892	-3.67353
	0.111506	-0.413234	Q4ML62	5075	3D domain protein GN=AQ16_5075	11	11	11	27.5	27.5	27.5	51.259	0	82.043	392660000	53	53779000	156530000	89726000	0	0	0	29670000	42950000	19999000	0	0	0	11	11	11	-1.35203	-1.54557	-1.4109	-6.49404	-6.47838	-4.89755	-2.15574	-2.37573	-3.28604	-7.88645	-3.70352	-5.04031
	0.132122	-0.417417	A0A0B5YR15	3431	50S ribosomal protein L20 GN=rplT	10	10	10	48.3	48.3	48.3	13.612	0	65.081	1375600000	93	139180000	395560000	147340000	0	0	0	96905000	356470000	240160000	0	0	0	10	10	10	-0.290114	-0.706272	-0.35743	-5.40043	-6.47877	-3.99188	-0.725687	-0.493712	-0.765705	-6.65686	-3.64594	-4.31603
	0.102843	-0.422531	Q4MU98	828	Flagellin GN=AQ16_828	29	12	12	86.7	35.7	35.7	30.91	0	323.31	1013600000	139	27843000	73068000	20448000	56461000	96075000	188530000	18109000	22090000	31383000	343420000	105790000	30377000	12	12	29	-2.58167	-2.53781	-3.19516	-0.775736	0.428162	2.59716	-2.73429	-3.44061	-2.92966	0.887661	3.20414	-0.574619
	0.245603	-0.436331	Q4MRY1	3644	Transcription elongation factor GreA GN=greA	5	5	5	62.7	62.7	62.7	17.437	0	57.988	363590000	30	18604000	59133000	17825000	0	1456000	0	49471000	106300000	109300000	1492300	0	0	5	5	5	-2.96327	-2.84769	-3.45331	-6.25989	-5.10447	-5.46672	-1.73252	-1.54183	-1.64468	-6.2507	-5.14662	-4.12477
	0.79001	-0.47034	Q4MX41	4930	Hemolytic enterotoxin family protein GN=AQ16_4930	63	63	63	86.6	86.6	86.6	49.264	0	323.31	29989000000	1807	2147300000	8678300000	4636700000	2048400000	1823900000	810020000	342070000	195060000	498690000	6181000000	894920000	1732300000	63	63	63	4.00442	4.54114	4.7095	5.2483	4.69989	4.66757	1.52389	0.214999	0.804139	5.6283	5.44156	4.95691
	0.317969	-0.471721	Q4MMY9	sdaAA	L-serine dehydratase, iron-sulfur-dependent, alpha subunit GN=sdaAA	11	11	11	36.6	36.6	36.6	29.915	0	44.959	390900000	64	47549000	84228000	49692000	8126800	5647700	4133000	31254000	56489000	55109000	36228000	6188600	6255700	11	11	11	-2.05426	-2.457	-2.22249	-1.86712	-3.07429	-1.91844	-2.55597	-2.5597	-2.2176	-1.75041	-1.04814	-2.64613
	0.76758	-0.478161	Q4MH02;A0A0B5Z1U6	4855;fabG	3-oxoacyl-[acyl-carrier-protein] reductase GN=fabG	14	14	14	76.8	76.8	76.8	26.102	0	252.66	2366500000	151	217860000	420010000	240390000	1707700	539700	0	296690000	575620000	613040000	587260	0	0	NaN	NaN	NaN	0.793758	0.205007	0.547809	-5.14003	-5.21789	-5.35739	0.935783	0.749804	1.05266	-5.31877	-4.45516	-4.5069
	0.61702	-0.478903	Q4MGR3	2634	Phosphate acetyltransferase GN=pta	23	23	23	71.8	71.8	71.8	34.726	0	245.38	4007300000	336	178140000	596200000	270430000	171550000	180410000	42991000	323650000	649550000	725800000	635210000	81666000	151720000	23	23	23	0.389126	0.542799	0.56302	1.99069	1.04018	1.07308	1.06482	0.782496	1.18506	2.1513	1.75869	1.63067
	0.86131	-0.489415	Q4MIM7	lpdA	Dihydrolipoyl dehydrogenase GN=lpdA	25	25	25	52.6	52.6	52.6	50.76	0	305.11	1544000000	276	34154000	101130000	75777000	124690000	152540000	65483000	54798000	65945000	61549000	547700000	97869000	162410000	25	25	25	-2.02903	-1.96158	-1.18908	1.11746	0.941886	1.2008	-1.27392	-1.86873	-2.01686	1.75026	1.90044	1.07769
	0.386932	-0.490025	A0A0B5YQY6	pdxS	Pyridoxal 5-phosphate synthase subunit PdxS GN=pdxS	19	19	19	80.7	80.7	80.7	31.789	0	323.31	5334300000	557	251190000	728270000	294080000	464120000	391640000	149550000	392650000	717570000	905210000	605960000	161130000	272920000	19	19	19	0.463911	0.415326	0.265826	2.42627	1.84882	1.51099	0.887453	0.693873	1.06704	1.73782	3.29926	2.21908
	0.292402	-0.500068	Q4MMD5	642	Uncharacterized protein GN=AQ16_642	7	7	7	16.4	16.4	16.4	48.74	0	17.273	38694000	14	0	0	0	3649900	3418500	2104300	2289800	9477500	9111800	8642700	0	0	7	7	7	-6.98194	-5.65649	-5.74192	-3.42628	-4.26433	-3.63043	-4.88136	-5.91479	-4.7811	-3.93346	-1.98448	-3.90289
	0.409999	-0.510862	A0A0B5Z7G8	3880	Probable butyrate kinase GN=buk	10	10	10	33.8	33.8	33.8	39.951	0	22.859	147680000	30	19944000	61513000	36539000	0	0	0	4864300	8710000	15690000	420930	0	0	10	10	10	-2.608	-2.65107	-2.43282	-4.78941	-5.7891	-5.9739	-5.46082	-5.79909	-3.73751	-5.26315	-4.25806	-5.49861
	0.397997	-0.514215	Q4MLS4	azoR4	FMN-dependent NADH-azoreductase GN=azoR4	9	9	9	40.4	40.4	40.4	22.796	0	31.243	591260000	53	118780000	190250000	124460000	2561400	0	0	39537000	53653000	62011000	0	0	0	9	9	9	-0.324706	-1.07562	-0.651491	-6.16066	-5.39061	-5.35816	-1.84495	-2.04833	-1.84355	-5.89714	-5.22373	-4.24592
	0.466722	-0.515202	Q4MK66	1029	Purine nucleoside phosphorylase DeoD-type GN=deoD PE=1 SV=1	19	19	19	96.6	96.6	96.6	25.675	0	323.31	2904500000	244	152130000	443800000	196750000	165650000	92201000	62072000	203290000	553040000	463730000	398900000	55155000	117820000	19	19	19	-0.216546	-0.391196	-0.181329	1.66683	0.705955	1.60942	0.106462	0.404141	0.142375	1.12148	2.26483	2.14151
	0.138809	-0.515829	A0A0B5Z842	2385	30S ribosomal protein S17 GN=rpsQ	8	8	8	58.6	58.6	58.6	10.189	0	19.222	772420000	38	107100000	274400000	112700000	0	0	0	34527000	142250000	100340000	661090	366560	70544	8	8	8	-0.776191	-0.718511	-0.50921	-5.97616	-6.59771	-4.26074	-1.13947	-0.771886	-0.99815	-7.30068	-4.73686	-3.2496
	0.401726	-0.530546	A0A0B5ZEY0	728	Malic enzyme, NAD binding domain protein GN=AQ16_728	24	24	24	50.5	50.5	50.5	62.189	0	203.06	1327000000	197	72869000	213880000	121860000	36559000	46018000	21831000	122240000	301100000	129570000	191530000	30736000	38764000	24	24	24	-0.870918	-0.990717	-0.625945	-0.0376013	-0.679687	0.328847	-0.613507	-0.494331	-1.19088	0.0743101	1.33755	-0.208659
	0.0978502	-0.533024	Q4MMT3	pdp	Pyrimidine-nucleoside phosphorylase GN=pdp	20	20	17	58.1	58.1	53	46.212	0	302.4	1289500000	104	106750000	291120000	141690000	0	0	0	115530000	266040000	364540000	3371000	484680	0	17	20	20	-0.674917	-0.364527	-0.0625308	-7.68614	-7.09644	-4.67952	0.129252	-0.3301	0.158296	-9.00172	-3.04434	-5.81697
	0.166623	-0.537513	Q4MLF6	2535	tRNA modification GTPase MnmE GN=trmE	10	10	10	20.1	20.1	20.1	50.561	0	54.786	153070000	36	11080000	55623000	26306000	0	0	0	5825600	16019000	38217000	0	0	0	10	10	10	-3.51285	-3.39692	-2.93996	-5.39214	-5.70704	-6.43391	-2.91496	-3.65444	-3.18802	-7.63816	-3.86608	-4.41629
	0.213579	-0.539877	A0A0B5Z855	2690	Peptide chain release factor 1 GN=prfA	14	14	14	45.1	45.1	45.1	40.414	0	132.31	828960000	56	72777000	317620000	116630000	0	0	0	65080000	100390000	156470000	0	0	0	14	14	14	-1.25541	-0.293697	-0.465619	-5.29893	-6.09431	-5.68599	-0.784235	-1.56871	-0.90621	-7.05793	-4.0983	-4.30337
	0.110358	-0.549632	Q4MPZ6	proC	Pyrroline-5-carboxylate reductase GN=proC	4	4	4	16.1	16.1	16.1	29.141	0	8.8215	38663000	15	3233500	8330900	5054500	692800	856660	211840	756290	5713600	13813000	0	0	0	4	4	4	-4.90401	-5.03464	-4.70685	-5.09059	-5.38356	-6.30216	-5.23372	-4.66737	-5.3252	-8.44017	-2.51467	-4.17256
	0.152578	-0.5553	Q4MGE0	map	Methionine aminopeptidase GN=map	4	4	4	17.3	17.3	17.3	27.526	0	8.3376	47796000	14	3065000	4814700	4273100	1098800	1079900	0	10355000	6977800	16132000	0	0	0	4	4	4	-5.43435	-5.40457	-5.57943	-6.20594	-6.17844	-5.37458	-4.152	-4.61295	-3.88137	-8.01271	-3.80079	-4.27955
	0.183176	-0.55602	Q4MH01	4198	Malonyl CoA-acyl carrier protein transacylase GN=fabD	8	8	8	38.9	38.9	38.9	33.615	0	69.949	188180000	32	25146000	44851000	15521000	0	0	0	17884000	41836000	42945000	0	0	0	8	8	8	-2.20524	-2.67155	-3.42182	-5.40452	-5.70288	-5.27912	-2.85268	-3.64242	-2.88729	-7.14462	-3.32934	-4.2445
	0.16775	-0.56923	Q4MI11	2481	Ribosomal RNA small subunit methyltransferase A GN=rsmA	3	3	3	13.4	13.4	13.4	32.768	0	7.6569	101900000	9	8344000	30517000	10486000	0	0	0	6657600	22942000	22955000	0	0	0	3	3	3	-3.83413	-3.39692	-4.41929	-5.79353	-6.15436	-5.52665	-5.08143	-6.68401	-3.45932	-7.78274	-3.82379	-4.16033
	0.12734	-0.570007	A0A0B5Z0C5	3980	Uncharacterized protein GN=AQ16_3980	5	5	5	27.4	27.4	27.4	31.496	0	13.078	104690000	18	9883900	29551000	11264000	0	0	0	2365100	27973000	23649000	0	0	0	5	5	5	-3.88603	-3.89056	-3.56634	-5.03494	-6.93004	-5.5418	-6.61963	-3.64411	-4.05926	-7.935	-2.59902	-5.26273
	0.177727	-0.576703	Q4MM15	secA	Protein translocase subunit SecA GN=secA	10	10	10	14.6	14.6	14.6	95.048	0	36.23	57610000	23	8137400	19391000	10505000	0	476870	0	12336000	5328600	1434600	0	0	0	10	10	10	-4.09984	-4.40307	-4.00127	-4.56534	-6.345	-5.43233	-5.3363	-4.67414	-4.3939	-6.88856	-3.01905	-4.70495
	0.424206	-0.591226	A0A0B5Z4P2	4324	Peptidase T GN=pepT	8	8	8	26.3	26.3	26.3	45.958	0	38.236	140200000	25	577930	7478400	2488700	12365000	19437000	2202200	0	14268000	7167100	58510000	8698900	7010400	8	8	8	-4.91867	-4.40078	-5.03306	-2.29509	-2.38429	-3.13245	-6.2415	-4.05684	-4.31657	-0.949238	-2.58724	-2.50167
	0.216617	-0.595795	Q4MLS7	2608	Pyridoxine kinase GN=pdxK	6	6	6	26.6	26.6	26.6	29.369	0	24.635	142210000	22	12923000	33299000	24621000	0	0	0	13524000	24968000	32879000	0	0	0	6	6	6	-4.04864	-3.49454	-3.67964	-4.16342	-5.47161	-3.96454	-3.13573	-3.21034	-2.78558	-5.79624	-2.59369	-3.42227
	1.32649	-0.611342	Q4MIB3	atpA	ATP synthase subunit alpha GN=atpA	27	27	27	50.4	50.4	50.4	54.643	0	237.45	3578000000	345	206980000	528360000	330230000	246780000	273390000	95334000	147670000	318540000	288330000	737780000	72737000	331870000	27	27	27	0.528537	0.527541	0.953199	2.13184	1.85667	1.64675	0.473442	0.22101	0.0738227	2.5145	2.19463	2.76016
	0.74798	-0.613894	Q4MVW7	3388	Uncharacterized protein GN=AQ16_3388	20	20	20	64.1	64.1	64.1	40.71	0	184.54	1566000000	213	78147000	231380000	108740000	52587000	81661000	22612000	129940000	181270000	291730000	259150000	36185000	92603000	20	20	20	-1.04021	-0.485731	-0.658196	0.383243	-0.694781	-0.154084	-0.28071	-0.701128	-0.188825	0.802782	0.0704227	0.502857
	0.598791	-0.64318	Q4MM85	1312	Bacterial extracellular solute-binding s, 5 Middle family protein GN=AQ16_1312	41	39	39	65.6	64.3	64.3	61.597	0	298.36	2605300000	353	0	0	4035000	288950000	501880000	125750000	851970	6828200	3521100	1050500000	189340000	433640000	39	39	41	-5.2522	-5.68561	-7.57503	2.34283	2.76544	2.41849	-4.86341	-6.49945	-7.35113	2.81396	2.57507	4.06727
	0.249974	-0.643567	Q4MJ81	3848	Acetyl-CoA carboxylase, biotin carboxylase subunit GN=accC	12	12	12	36	36	36	49.797	0	48.034	416130000	55	42244000	71397000	28753000	0	0	0	59656000	106220000	107210000	646670	0	0	12	12	12	-2.03062	-2.04495	-2.44495	-4.58529	-5.94287	-5.99509	-1.70776	-1.49228	-1.22494	-6.60228	-4.46131	-3.52895
	0.900774	-0.651564	Q4MTF7	lpdA	Dihydrolipoyl dehydrogenase GN=lpdA	40	40	40	71.7	71.7	71.7	49.439	0	323.31	28513000000	1387	1684700000	5143000000	2441400000	1030200000	1345200000	518460000	2705800000	4069700000	4749900000	2195700000	693600000	1935300000	40	40	40	3.71514	3.90956	3.88903	4.33597	4.24078	4.34904	4.05836	3.95761	4.2387	4.32832	5.07949	5.47267
	0.988114	-0.654991	Q4MIM5	3883	2-oxoisovalerate dehydrogenase subunit beta GN=bfmBAB	18	18	18	68.2	68.2	68.2	35.805	0	251.04	2964900000	335	189030000	516660000	213770000	309600000	286440000	94944000	126810000	193240000	307180000	465570000	88502000	173110000	18	18	18	0.536189	0.332304	-0.0979796	1.47799	1.59746	0.927785	-0.175844	-0.755019	-0.0487605	1.55001	2.07724	2.34095
	0.128894	-0.672457	Q4MIT3	5836	Uncharacterized protein GN=AQ16_5836	25	25	25	19.3	19.3	19.3	208.51	0	75.077	282590000	42	423710	0	0	0	0	0	65911000	136210000	80040000	0	0	0	25	25	25	-6.11181	-6.68794	-5.73365	-5.93883	-6.18644	-5.64945	-1.50684	-1.31945	-2.113	-9.03018	-3.84009	-2.88708
	0.814252	-0.685243	Q4MFZ8	2633	Putative heme-dependent peroxidase AQ16_2633 GN=AQ16_2633	14	14	14	50.6	50.6	50.6	28.651	0	131.66	610970000	100	29607000	57918000	26260000	26783000	32393000	13414000	32530000	97733000	105150000	137420000	10517000	41253000	14	14	14	-2.01495	-2.50904	-2.04734	-0.469554	-1.08699	-0.540301	-1.97293	-1.90865	-1.6933	-0.386176	0.659332	-0.314277
	0.208168	-0.690945	Q4MR71	glpX	Fructose-1,6-bisphosphatase GN=glpX	7	7	7	21.7	21.7	21.7	34.622	0	17.818	178790000	25	7084000	43991000	27671000	0	0	0	24653000	21143000	53595000	0	0	653820	7	7	7	-3.4524	-3.35302	-2.93825	-6.67506	-6.15847	-4.64553	-2.90939	-3.59014	-2.63996	-7.32887	-3.55934	-4.51801
	0.262976	-0.693199	A0A0B5ZH76	2408	Transcription termination/antitermination protein NusG GN=nusG	7	7	7	50.3	50.3	50.3	20.258	0	54.63	232630000	34	30455000	86252000	19554000	0	0	317130	20804000	35924000	39328000	0	0	0	7	7	7	-2.88347	-2.41537	-3.44318	-3.92452	-6.52292	-5.47492	-2.8403	-2.99985	-3.21501	-5.96828	-4.42046	-3.45403
	0.778289	-0.696222	Q4MH98	2338	Arginase GN=rocF	13	13	13	43.4	43.4	43.4	32.32	0	85.277	261050000	61	1328500	5454000	1281400	43997000	46677000	19994000	2606600	0	0	68533000	24839000	46343000	13	13	13	-4.62322	-6.87284	-6.54898	-0.916623	-0.722549	-0.106414	-4.80274	-5.03675	-4.76992	-0.49228	0.652578	0.182783
	0.855004	-0.696868	Q4MQ57	2878	Phosphoglycerate kinase GN=pgk	36	36	36	91.4	91.4	91.4	42.311	0	323.31	12252000000	644	714380000	2514500000	950270000	267000000	203170000	81972000	1051900000	2217300000	3465400000	442930000	82926000	260170000	36	36	36	2.28102	2.57559	2.33626	1.70295	1.49728	1.30416	2.69646	2.72954	3.44201	1.58567	2.1743	2.83502
	0.672116	-0.700884	Q4MJ95	3833	Uncharacterized protein GN=AQ16_3833	14	14	14	54.4	54.4	54.4	38.592	0	222.6	404580000	102	5130800	35545000	8800300	18785000	34397000	7515500	19914000	48043000	54501000	110870000	11786000	49298000	14	14	14	-4.27936	-3.88803	-4.27882	-1.14746	-1.42127	-0.443381	-2.6103	-3.18529	-2.45092	-0.800124	-0.536634	0.4273
	1.53783	-0.715918	A0A0B5Z2Y2	2650	Polyamine aminopropyltransferase GN=speE	18	18	18	62.2	62.2	62.2	31.143	0	84.414	1309400000	145	121900000	346710000	119640000	26425000	30783000	9475100	77633000	220500000	205100000	125200000	8701900	17366000	18	18	18	-0.455228	-0.352591	-0.261995	-1.03592	-1.34304	-1.07658	-0.587972	-0.921755	-0.335967	-0.147156	-0.799219	-0.361414
	0.638	-0.728568	Q4MU22	242	2-methylcitrate dehydratase GN=prpD	31	31	31	66.7	66.7	66.7	53.449	0	173.73	647190000	186	0	3164300	0	52270000	77051000	28927000	0	3008100	0	420220000	30022000	32533000	31	31	31	-6.62267	-4.11656	-5.16664	0.0933994	-0.334961	0.500865	-5.06721	-6.85701	-5.59429	1.45942	1.04943	-0.0638421
	0.308506	-0.729946	Q4MST1	972	Tetratricopeptide repeat family protein GN=AQ16_972	6	6	6	20	20	20	48.4	0	25.067	92779000	14	8489200	30782000	17798000	0	0	0	7031400	2333500	26345000	0	0	0	6	6	6	-3.78391	-3.96526	-3.20255	-5.82019	-6.33907	-4.7829	-4.1867	-5.06877	-3.83352	-6.33701	-3.39897	-5.01634
	0.381813	-0.736451	Q4MQ48	2886	Carboxylesterase GN=est	7	7	7	40.2	40.2	40.2	28.124	0	47.89	267860000	33	27738000	61872000	11691000	0	12264000	688340	20438000	61126000	69842000	2203100	0	0	7	7	7	-2.63837	-2.54836	-3.28807	-6.01524	-3.53036	-5.06697	-5.8358	-2.49241	-2.82738	-4.3719	-3.41755	-4.61377
	0.214051	-0.73792	Q4MW11	1450	3-5 exoribonuclease YhaM GN=yhaM	8	8	8	28.3	28.3	28.3	35.513	0	31.326	181290000	22	11367000	23978000	14153000	3904500	12983000	1201600	19363000	19233000	51955000	23148000	0	0	8	8	8	-3.37958	-3.82264	-2.93098	-3.40994	-2.64844	-6.26819	-2.86129	-3.65487	-3.113	-2.95885	-2.30873	-4.84523
	0.390917	-0.741107	Q4MHA2	2335	Phosphoglucosamine mutase GN=glmM	20	20	20	64.1	64.1	64.1	48.474	0	184.09	1982900000	151	180790000	531350000	261410000	414940	1564600	0	228040000	336940000	436560000	5824100	0	0	20	20	20	0.492901	-0.210918	0.72	-6.08514	-6.10189	-4.73071	0.499229	0.287293	0.729825	-5.30997	-3.60953	-5.77492
	0.345945	-0.745026	Q4MH82	hpt	Hypoxanthine phosphoribosyltransferase GN=hpt	11	11	11	75.6	75.6	75.6	20.208	0	106.25	1470100000	90	96935000	284600000	107620000	842070	812850	527820	237450000	365900000	373030000	2374400	0	0	11	11	11	-0.987653	-0.495467	-0.6994	-5.62495	-6.10054	-4.18368	0.616546	0.44837	0.370563	-5.19153	-3.19574	-5.28682
	0.276552	-0.755209	Q4MK96	dapA	4-hydroxy-tetrahydrodipicolinate synthase GN=dapA	11	11	11	54.5	54.5	54.5	31.247	0	99.224	549130000	86	40652000	147630000	32928000	0	0	0	53067000	145240000	128320000	1296800	0	0	11	11	11	-1.89374	-1.60912	-1.92503	-5.37577	-6.68159	-5.4336	-1.77832	-1.47833	-1.37991	-7.0152	-3.6129	-4.59723
	0.258945	-0.758995	A0A0B5ZIJ9	2173	DNA helicase GN=pcrA	5	5	5	9.3	9.3	9.3	84.258	0	9.5966	80860000	10	9592700	17747000	11744000	0	0	0	2632100	28794000	10350000	0	0	0	5	5	5	-3.98065	-4.41816	-4.1487	-6.15645	-5.50232	-5.55061	-4.96883	-3.71991	-6.31731	-7.11524	-3.18437	-4.63279
	0.193534	-0.759006	Q4MXI6	4794	N-acetylmuramoyl-L-alanine amidase family protein GN=AQ16_4794	8	8	8	15.2	15.2	15.2	65.852	0	20	71529000	16	6038200	19872000	10207000	1735500	0	980940	7501400	20735000	4458000	0	0	0	8	8	8	-4.25756	-4.48771	-4.03179	-3.99036	-4.60324	-6.14124	-4.32392	-4.11207	-6.48918	-6.87492	-2.85247	-2.73044
	0.458465	-0.767093	A0A0B5ZFP4	4208	Ribosome maturation factor RimM GN=rimM	3	3	3	25.7	25.7	25.7	19.302	0	6.8999	44521000	14	4153000	6589700	3781200	0	0	0	6532300	13456000	10009000	0	0	0	3	3	3	-4.8166	-5.63313	-5.0632	-7.28342	-5.69842	-5.60987	-4.89919	-4.51943	-4.45979	-6.34709	-4.75533	-5.18802
	0.612689	-0.770536	A0A0B5ZH61	3360	Methyltransferase small domain protein GN=AQ16_3360	6	6	6	24.4	24.4	24.4	36.861	0	13.047	96796000	17	16892000	36993000	20437000	0	0	0	11859000	8294200	2321100	0	0	0	6	6	6	-2.98415	-3.3353	-3.04121	-6.11453	-5.4628	-4.75936	-3.51181	-6.09944	-4.90331	-5.02765	-5.13371	-3.86373
	0.215735	-0.77332	Q4MMR4;Q4MU50	hup;hupA	DNA-binding protein HU GN=hup	8	8	8	83.3	83.3	83.3	9.729	0	241.75	385330000	59	17668000	60483000	41040000	1270000	628160	2863000	57542000	126610000	76580000	656060	0	0	NaN	NaN	NaN	-2.89905	-2.15011	-2.14996	-6.09411	-7.25882	-2.76782	-1.5055	-1.36479	-2.36626	-4.40417	-4.0939	-5.30271
	0.488703	-0.778724	Q4MTG9	4069	2,3,4,5-tetrahydropyridine-2,6-dicarboxylate N-acetyltransferase GN=dapD	16	16	16	55.8	55.8	55.8	25.704	0	323.31	2220700000	242	153690000	336970000	138920000	79496000	70859000	27362000	225240000	458460000	475730000	178990000	35868000	39122000	16	16	16	-0.33072	-0.736571	-1.32075	-0.193099	-0.409306	-0.380405	-0.125515	0.343482	0.367329	-0.0510204	1.81644	-0.41206
	0.300937	-0.778954	Q4MS78	3550	Trigger factor GN=tig	42	42	42	82.8	82.8	82.8	47.214	0	323.31	12362000000	465	697970000	3084100000	1115900000	479180	0	772250	1307200000	2921700000	3233500000	0	0	0	42	42	42	2.27419	3.00615	2.65307	-3.60639	-6.88205	-4.84537	3.11592	3.4406	3.47551	-5.10343	-3.575	-4.31852
	0.323578	-0.782229	Q4MJK9	3706	30S ribosomal protein S20 GN=rpsT	5	5	5	40	40	40	9.3417	0	145.98	220270000	37	16096000	32765000	33150000	0	0	0	20421000	43942000	73896000	0	0	0	5	5	5	-2.85827	-2.84921	-2.18323	-5.17106	-6.04909	-5.29803	-3.07114	-2.87852	-1.87577	-6.61228	-4.01496	-3.54426
	0.833579	-0.782994	A0A0B5Z397	4245	Insulinase family protein GN=AQ16_4245	15	15	15	49.9	49.9	49.9	47.021	0	220.1	822580000	106	26899000	110300000	64643000	32421000	23022000	12782000	56732000	187510000	187900000	49122000	19876000	51361000	15	15	15	-2.2553	-1.79039	-2.01495	-0.804269	-1.65943	-1.34689	-1.71773	-1.57494	-1.16558	-1.06739	-0.557198	0.162983
	0.177609	-0.786563	A0A0B5YR03	2557	Transcriptional regulatory protein yycF GN=yycF	5	5	5	29.9	29.9	29.9	26.81	0	10.463	31737000	5	325730	329410	279860	0	0	0	4517500	7553400	18731000	0	0	0	5	5	5	-5.8912	-6.33617	-5.00144	-6.33712	-7.27713	-4.14211	-4.44736	-4.59403	-4.34437	-7.8498	-3.17536	-4.37152
	0.52731	-0.792437	Q4MJ34	105	Xaa-His dipeptidase family protein GN=pepD	7	7	7	18.2	18.2	18.2	54.445	0	17.664	49326000	20	6228700	12220000	8472200	3351600	5007800	2502500	2622900	0	961990	7957900	0	0	7	7	7	-4.64398	-4.8397	-4.0928	-5.0309	-3.88989	-6.01648	-6.26382	-5.62505	-4.77422	-3.82904	-4.65443	-4.07649
	0.343019	-0.796981	Q4MGD3	2379	50S ribosomal protein L6 GN=rplF	16	16	16	84.9	84.9	84.9	19.515	0	213.63	5678800000	205	571550000	1401700000	612210000	781180	1342100	0	649620000	1095400000	1341900000	4274400	0	0	16	16	16	1.82275	1.79095	1.69474	-7.0307	-6.95683	-4.90417	1.99242	1.67947	2.11393	-6.71816	-5.34549	-4.43712
	0.180299	-0.799813	A0A0B5Z259	1439	Glycerol-3-phosphate dehydrogenase GN=AQ16_1439	16	16	16	37.5	37.5	37.5	62.42	0	84.562	454950000	59	56153000	167770000	73305000	199980	505170	0	21038000	105320000	29875000	785300	0	0	16	16	16	-1.36197	-1.66623	-1.06629	-4.76131	-6.71917	-5.32904	-2.01239	-1.92771	-2.9916	-7.84886	-2.52425	-4.03698
	0.648752	-0.802541	Q4MIM6	3882	2-oxoisovalerate dehydrogenase subunit alpha GN=bfmBAA	17	17	17	49.8	49.8	49.8	36.767	0	93.572	1238300000	192	66010000	191500000	117080000	168340000	137480000	54357000	66711000	63575000	116420000	161460000	28892000	66430000	17	17	17	-1.71661	-1.47668	-1.32414	0.307224	0.36672	-0.608805	-2.13483	-2.19554	-1.67931	-0.0930066	1.19467	1.3711
	0.391161	-0.80642	A0A0B5Z5E9	3300	Putative tRNA binding domain protein GN=AQ16_3300	9	9	9	52.7	52.7	52.7	21.952	0	42.21	504350000	51	45442000	98279000	53753000	0	0	0	66519000	106780000	131410000	0	1094600	1069400	9	9	9	-1.82159	-2.21932	-1.96627	-5.52206	-4.98745	-5.99054	-1.2441	-1.40846	-1.42936	-6.08353	-3.24473	-4.75253
	0.744802	-0.814969	Q4MVS3	3343	30S ribosomal protein S4 GN=rpsD	24	24	24	87.5	87.5	87.5	22.986	0	192.54	3789700000	139	681070000	1145800000	576290000	2267800	970200	1240600	289630000	479010000	595540000	16400000	1386800	125640	24	24	24	2.98459	2.47323	0.628324	-4.49571	-5.85731	-4.29709	-0.322941	-0.578796	0.421106	-3.85896	-4.22321	-4.12303
	0.365826	-0.815711	A0A0B5Z9L2	2399	30S ribosomal protein S12 GN=rpsL	7	7	7	55.7	55.7	55.7	15.446	0	21.579	704080000	26	107250000	227370000	125010000	313690	917660	749660	37995000	94950000	108230000	1286800	0	0	7	7	7	-0.679515	-0.308426	-0.795727	-6.5012	-5.66591	-3.76626	-1.71454	-1.66753	-0.704724	-5.30299	-4.47943	-3.70382
	0.388544	-0.815719	Q4MV63	5591	Uncharacterized protein GN=AQ16_5591	9	9	9	15.6	15.6	15.6	73.957	0	26.509	165900000	21	18911000	38869000	28140000	0	0	0	16388000	46374000	8050100	0	1183300	7985100	9	9	9	-2.72451	-3.1704	-2.75672	-5.00241	-7.02175	-5.88892	-2.50594	-2.86696	-3.99772	-6.0958	-3.87216	-5.49796
	0.234244	-0.81876	Q4MKB4	4240	tRNA pseudouridine synthase B GN=truB	5	5	5	24.1	24.1	24.1	34.66	0	61.172	98219000	18	10551000	30336000	20228000	197870	0	0	9239500	8093400	19574000	0	0	0	5	5	5	-3.50415	-3.63153	-3.18689	-4.92275	-8.22666	-5.22724	-4.77519	-4.91246	-3.44432	-7.0441	-4.68146	-4.1948
	0.39296	-0.821642	A0A0B5Z970	3484	Succinate dehydrogenase/fumarate reductase, flavoprotein subunit GN=sdhA	15	15	15	32.2	32.2	32.2	66.035	0	42.385	150690000	36	15154000	26900000	12838000	7161800	5118000	959720	5301300	33434000	4271200	34826000	3901600	822610	15	15	15	-3.41261	-4.0707	-3.50414	-2.41936	-4.30698	-4.43217	-5.38998	-3.58879	-3.7291	-1.84124	-2.94846	-3.90389
	0.319708	-0.823508	Q4MTA3	4132	Ribosomal RNA small subunit methyltransferase H GN=rsmH	5	5	5	19.7	19.7	19.7	34.9	0	20.363	150180000	12	14124000	41002000	22346000	3749000	6650400	0	1794700	19961000	26621000	13935000	0	0	5	5	5	-3.48448	-3.60002	-2.87391	-6.51983	-6.12641	-5.91786	-4.8581	-3.9867	-3.35493	-6.81255	-3.34524	-5.93579
	2.65538	-0.825441	Q4MQF9	2071	TerD domain protein GN=AQ16_2071	7	7	7	47.4	47.4	47.4	20.789	0	37.273	343000000	78	10416000	16710000	4574800	22471000	26465000	7251100	13838000	29839000	23339000	86905000	35431000	65764000	7	7	7	-3.70409	-3.88198	-5.01027	-1.22968	-1.30857	-1.58637	-3.43966	-2.84678	-3.19164	-0.454194	-0.598286	-0.595815
	0.339773	-0.828457	Q4MS12	3615	Adenine phosphoribosyltransferase GN=apt	8	8	8	34.1	34.1	34.1	18.643	0	34.337	293420000	31	44919000	105290000	30960000	0	0	0	15928000	45751000	49438000	1131700	0	0	8	8	8	-1.80882	-2.28184	-2.71869	-5.50488	-7.27044	-4.94623	-2.63374	-2.20388	-2.0446	-6.5183	-4.50819	-4.20968
	1.11998	-0.830998	Q4MMA1	pepF	Oligoendopeptidase F GN=pepF	19	19	19	36.3	36.3	36.3	70.277	0	178.05	612160000	98	21189000	37749000	37144000	36827000	47406000	15435000	19954000	110260000	4410500	198850000	26917000	56009000	19	19	19	-2.02077	-2.68292	-1.86407	-0.350392	-0.85718	-0.770716	-2.30172	-1.88784	-4.50328	0.736705	0.117531	-0.33953
	1.4379	-0.84236	Q4MNQ4	3803	Probable glycine dehydrogenase (decarboxylating) subunit 2 GN=gcvPB	22	22	22	53.8	53.8	53.8	54.865	0	323.31	1364000000	231	35080000	90653000	56894000	169670000	191690000	73572000	34562000	52936000	61177000	323490000	60579000	213740000	22	22	22	-1.43335	-1.17643	-1.03561	0.824797	1.16946	0.928787	-2.23714	-2.14438	-2.2788	1.31199	2.05267	2.08546
	1.90335	-0.851926	Q4MQP8	ald	Alanine dehydrogenase GN=ald	35	35	19	90.7	90.7	56	40.234	0	323.31	17028000000	1902	552000000	1489500000	763420000	1756100000	2130100000	793220000	419930000	693860000	1002100000	4592000000	868910000	1967200000	19	35	35	2.10816	2.12599	2.07248	4.4084	4.62734	4.18976	1.42135	1.2763	1.94291	5.04812	5.17885	5.55431
	0.706457	-0.854831	Q4MPU2	2260	D-alanine--D-alanine ligase GN=ddl	12	12	12	33.5	33.5	33.5	40.107	0	61.867	702060000	56	39968000	146850000	66651000	0	0	580990	80092000	141940000	221400000	1211500	1786700	1582400	12	12	12	-2.09516	-1.58712	-1.51797	-4.81818	-5.50501	-4.45371	-0.45678	-1.54482	-0.225417	-4.95587	-3.42194	-3.83459
	0.597251	-0.85484	Q4MXM1	4757	LPXTG cell wall anchor domain protein GN=AQ16_4757	33	33	33	68.7	68.7	68.7	65.401	0	228.65	2116000000	234	236160000	393890000	195130000	9530600	18547000	7475100	286560000	603110000	185260000	144800000	23395000	12182000	33	33	33	0.358662	-0.65458	-0.0241764	-1.52281	-1.59831	-0.77381	0.651155	0.649195	-0.972475	-0.267902	0.468324	-1.53083
	1.34657	-0.858604	A0A0B5ZDG9	3919	LPXTG cell wall anchor domain protein GN=AQ16_3919	53	53	53	65.6	65.6	65.6	86.575	0	323.31	11339000000	1202	604270000	1622700000	469480000	802300000	1043100000	444390000	1190300000	1489200000	467810000	1951600000	407640000	846200000	53	53	53	2.11987	2.0733	1.42394	3.4426	3.43499	3.60384	2.46345	2.19277	0.969129	3.76657	4.65844	4.63223
	0.317462	-0.858769	Q4MNX0	3740	DEAD-box ATP-dependent RNA helicase CshB GN=cshB	11	11	11	34.2	34.2	34.2	49.975	0	57.452	109830000	33	10628000	62033000	18058000	0	0	0	5204300	8253000	5652300	0	0	0	11	11	11	-3.64906	-3.31389	-3.1022	-5.04036	-5.87253	-5.94312	-3.88682	-4.40338	-4.79741	-6.89782	-3.71189	-3.66999
	0.20556	-0.881005	Q4MNZ8	3718	Radical SAM methylthiotransferase, MiaB/RimO family protein GN=AQ16_3718	9	9	9	28.4	28.4	28.4	51.427	0	97.998	227080000	17	9636600	42035000	38734000	0	0	0	31120000	28449000	77101000	0	0	0	9	9	9	-3.53041	-3.02622	-2.23754	-5.82635	-7.02974	-4.32647	-2.22802	-6.49948	-2.27911	-7.6484	-2.73387	-4.15728
	0.465503	-0.882243	A0A0B5Z963	2394	50S ribosomal protein L3 GN=rplC	24	24	24	80.5	80.5	80.5	22.692	0	323.31	5271300000	242	620520000	1303700000	598140000	1811200	0	0	425340000	1209800000	1111900000	0	0	0	24	24	24	2.0098	1.72892	1.61437	-4.50229	-5.77983	-5.4195	1.52351	1.89878	1.98855	-5.80332	-3.59063	-3.66095
	0.219471	-0.889858	Q4MH83	2455	ATP-dependent zinc metalloprotease FtsH GN=ftsH	10	10	10	21.5	21.5	21.5	70.143	0	43.93	295130000	31	43115000	78512000	41333000	0	1083800	0	16636000	71926000	41850000	671560	0	0	10	10	10	-1.7076	-2.32116	-2.27324	-5.11381	-4.47538	-6.30386	-3.16762	-2.29808	-2.72379	-7.33486	-2.49811	-3.39051
	0.425614	-0.897894	A0A0B5Z337	3429	Translation initiation factor IF-3 GN=infC	8	8	8	45.2	45.2	45.2	18.949	0	76.237	799270000	70	102340000	172930000	93327000	0	0	0	81665000	194220000	152590000	0	0	2209600	8	8	8	-0.495889	-1.14713	-0.807984	-6.40773	-6.4266	-6.01307	-1.04099	-0.572275	-0.891872	-7.0682	-5.04679	-4.03872
	0.256728	-0.909416	Q4MIT4	5835	Phage tail family protein GN=AQ16_5835	7	7	7	19.5	19.5	19.5	55.685	0	30.249	155950000	13	0	4571600	0	0	0	0	35924000	75728000	39727000	0	0	0	7	7	7	-5.96906	-5.2248	-6.303	-5.68637	-6.21774	-5.40151	-1.96486	-1.93774	-2.61784	-7.62513	-3.68294	-3.2693
	0.410383	-0.918744	A0A0B5ZDF0	2512	Serine--tRNA ligase GN=serS	17	17	17	44.8	44.8	44.8	48.73	0	151.88	1009700000	104	66222000	298780000	132540000	0	0	0	74332000	191100000	229930000	908220	886650	14964000	17	17	17	-0.991481	-0.6184	-0.461719	-5.11164	-6.7888	-4.80097	-0.512742	-0.717614	-0.34873	-6.08549	-4.07369	-3.786
	1.15717	-0.921129	A0A0B5ZJV9	4801	Uncharacterized protein GN=AQ16_4801	22	22	22	58	58	58	41.016	0	273.86	2857600000	209	129060000	415410000	192680000	43241000	36688000	14862000	354250000	706240000	794880000	114680000	9327200	46306000	22	22	22	-0.0590776	0.0341066	-0.108304	-0.623307	-0.737517	-0.93129	1.07964	1.09717	1.3447	-0.152304	-0.25771	0.881286
	0.381482	-0.922825	A0A0B5Z3I4	2823	NlpC/P60 family protein GN=AQ16_2823	54	54	54	72.8	72.8	72.8	51.246	0	323.31	22887000000	801	1779900000	5680500000	2899900000	1517800	1048000	475890	3846600000	4724900000	3934500000	9951300	0	7968000	54	54	54	3.57923	3.89427	4.01743	-6.7635	-4.34494	-7.01634	4.4914	3.15506	4.45036	-6.17847	-4.87995	-4.29789
	0.198817	-0.923188	Q4MQI2	2049	Fumarate hydratase class I GN=AQ16_2049	12	12	12	32.2	32.2	32.2	55.915	0	265.07	1560100000	101	111020000	330200000	304950000	21031000	7373100	2155600	88943000	384310000	233400000	49562000	412520	26781000	12	12	12	-0.279827	-0.236864	0.670789	-1.18098	-1.86705	-5.38728	0.0999157	0.180086	-0.354058	-1.25545	-4.25138	-0.158918
	0.250764	-0.928725	Q4MTS4;Q4MME9	asnB	Asparagine synthase GN=asnB	11	11	11	22.1	22.1	22.1	73.411	0	36.489	124230000	27	12234000	35847000	16314000	370420	1591100	0	14591000	35870000	7416300	0	0	0	NaN	NaN	NaN	-3.62184	-3.70083	-3.38318	-7.32555	-4.36933	-4.77467	-3.2038	-3.59627	-4.09744	-5.96877	-2.3044	-5.41021
	0.373896	-0.932713	Q4MJY2	4351	3D domain protein GN=AQ16_4351	21	15	15	74.2	52.6	52.6	32.943	0	323.31	1424400000	119	103300000	281240000	64429000	3398900	1591900	302300	194010000	303340000	461930000	1784800	0	9061900	15	15	21	-0.841833	-0.900665	-1.86741	-4.00915	-5.4962	-5.261	0.586021	-0.416856	1.10587	-5.69435	-3.81551	-2.45834
	1.2319	-0.938317	Q4MMT5	3954	Phosphopentomutase GN=deoB	26	26	26	54.3	54.3	54.3	44.02	0	318.92	2998200000	348	133290000	392450000	219560000	169140000	194070000	69492000	361380000	303240000	679690000	261790000	81666000	132410000	26	26	26	-0.191183	-0.0509044	-0.0382249	0.545724	0.802894	0.479255	0.761391	-0.0790713	0.885227	0.909734	2.08923	1.64386
	0.823298	-0.942059	Q4MH62	74	Uncharacterized protein GN=AQ16_74	12	12	12	42.3	42.3	42.3	41.62	0	133.4	179940000	44	0	6048200	0	17868000	13114000	10963000	2635900	0	0	108010000	14256000	7043400	12	12	12	-5.84101	-7.22934	-5.85533	-1.35006	-2.41189	-0.924729	-4.7258	-3.89956	-7.00108	-0.683321	-0.0851121	-1.09207
	0.862338	-0.944597	Q4MU36	230	Bacterial regulatory, arsR family protein GN=AQ16_230	3	3	3	26.3	26.3	26.3	11.357	0	4.9012	37337000	8	501870	7618500	3267900	838880	0	0	7165700	11590000	6353600	0	0	0	3	3	3	-4.93975	-5.42465	-5.33472	-4.80566	-5.85566	-5.51252	-5.15198	-4.99895	-5.16674	-5.20963	-3.83018	-4.30023
	0.349447	-0.950033	Q4MGV4	4221	ATP-dependent protease ATPase subunit HslU GN=hslU	9	9	9	23.3	23.3	23.3	52.168	0	24.453	164300000	31	16699000	29335000	29710000	0	571390	0	32148000	30217000	25624000	0	0	0	9	9	9	-3.05654	-3.42847	-2.84792	-5.38309	-5.17383	-4.92804	-2.49476	-3.27055	-3.16277	-6.45197	-3.1561	-3.02679
	0.625345	-0.950627	A0A0B5Z8S6	714	Mannosyl-glycoendo-beta-N-acetylglucosaminidase family protein GN=AQ16_714	21	21	21	54.7	54.7	54.7	53.369	0	73.77	1064300000	88	115660000	345530000	180820000	2766400	4874100	1854400	102110000	145040000	133780000	29743000	2069900	0	21	21	21	-0.322707	-0.0295822	-0.167454	-3.44875	-3.88553	-2.53762	-0.233967	-1.22592	-0.819441	-1.49012	-2.14129	-3.38861
	0.211439	-0.952608	Q4MR49	2995	FeS assembly ATPase SufC GN=sufC	17	17	17	64	64	64	29.031	0	323.31	1577400000	154	163330000	412880000	128100000	3175200	0	2112000	172110000	300640000	394020000	0	0	1048200	17	17	17	-0.164083	-0.475207	-0.271543	-4.51616	-6.6134	-7.15888	-0.0286005	-0.161309	0.152334	-8.23161	-3.35864	-3.84036
	0.720281	-0.953619	Q4MKD1	4224	Elongation factor Ts GN=tsf	29	29	29	74.6	74.6	74.6	32.449	0	323.31	11415000000	437	791240000	2343600000	1055600000	578700	2678200	0	1624600000	2394100000	3196900000	5031400	972930	0	29	29	29	2.75262	2.11341	1.98319	-6.05881	-5.83093	-5.20984	3.53838	3.14515	2.785	-5.81881	-4.42019	-3.99972
	0.853275	-0.954398	Q4MPU0	2258	DEAD-box ATP-dependent RNA helicase CshA GN=cshA	32	32	32	61.9	61.9	61.9	58.943	0	320.56	2438100000	213	317280000	923460000	512940000	465670	501570	1143000	149120000	352780000	177650000	2780000	0	0	32	32	32	1.0832	1.23557	1.97824	-5.98903	-5.10471	-5.25189	-1.24232	-0.414013	-1.30982	-5.22196	-3.69601	-4.56446
	0.278212	-0.961885	Q4MM13	2829	Peptide chain release factor 2 GN=prfB	10	10	10	32.8	32.8	32.8	37.173	0	47.857	273590000	49	22422000	102120000	44872000	0	0	0	19461000	29282000	55432000	0	0	0	10	10	10	-2.30518	-1.99552	-1.61652	-5.82604	-6.84229	-5.26727	-2.87013	-3.18365	-2.40368	-7.45163	-2.95607	-4.64224
	0.303614	-0.962104	A0A0B5YRL2	2390	30S ribosomal protein S19 GN=rpsS	11	11	11	73.9	73.9	73.9	10.627	0	223.3	599080000	68	24572000	182240000	71281000	0	0	0	55835000	88337000	176460000	0	234530	125460	11	11	11	-1.882	-1.56354	-1.19513	-6.0044	-5.57003	-5.58365	-2.01083	-2.20414	-1.31807	-7.20939	-4.1769	-2.88547
	0.342833	-0.969246	Q4MQ20	2912	Uncharacterized protein GN=AQ16_2912	8	8	8	63	63	63	16.196	0	70.54	297180000	42	24761000	77140000	10545000	1440500	663130	655130	23609000	81012000	77097000	259140	0	0	8	8	8	-2.37958	-2.37305	-6.0335	-5.52578	-6.5169	-5.3246	-1.97317	-1.65618	-2.13937	-6.93696	-4.34429	-3.17828
	0.527406	-0.973188	A0A0B5ZCV9	3641	Peptidase U32 family protein GN=AQ16_3641	8	8	8	26.2	26.2	26.2	35.555	0	14.521	86644000	12	2646800	19600000	7379300	0	0	0	10391000	19968000	26540000	0	0	118910	8	8	8	-4.92035	-4.06383	-3.65874	-6.1568	-6.06524	-4.92624	-3.92612	-3.91806	-3.71118	-5.83183	-4.98515	-3.41174
	0.399302	-0.975692	Q4MI90	2412	RNA 2-O ribose methyltransferase substrate binding family protein GN=AQ16_2412	3	3	3	15	15	15	27.007	0	8.4763	60497000	11	5052200	10686000	6540600	0	0	0	3116700	7870400	27231000	0	0	0	3	3	3	-4.24574	-4.45553	-4.18795	-5.70996	-6.1853	-4.53792	-5.35855	-4.4515	-4.14644	-6.09714	-2.94322	-4.46574
	0.479269	-0.992985	Q4MH33	2360	30S ribosomal protein S9 GN=rpsI	9	9	9	69.2	69.2	69.2	14.491	0	88.623	1703900000	55	282090000	597250000	247660000	0	0	0	81403000	257620000	237190000	0	680490	0	9	9	9	0.873021	0.342185	0.860702	-5.77515	-6.87634	-4.66922	-0.0441409	0.0315407	-0.0311449	-6.04988	-4.09546	-4.19642
	0.342524	-1.00638	A0A0B5ZBF5	3614	Single-stranded-DNA-specific exonuclease RecJ GN=recJ	6	6	6	9.8	9.8	9.8	88.153	0	16.596	44651000	10	3214400	11642000	5224300	0	0	0	8801800	12852000	2917100	0	0	0	6	6	6	-4.56019	-4.95399	-4.33503	-5.88671	-6.45391	-5.63701	-4.724	-4.91949	-8.30251	-7.34252	-3.49634	-4.11964
	0.417512	-1.008	Q4MR53	2999	FeS assembly protein SufB GN=sufB	31	31	31	63.9	63.9	63.9	52.523	0	323.31	3151200000	273	225870000	707100000	387730000	0	0	911510	354110000	740420000	731870000	1500600	903200	840450	31	31	31	0.728736	0.836419	1.06721	-5.85581	-7.03467	-4.69958	0.987386	-0.382769	1.27662	-6.24194	-3.55727	-4.76685
	0.420535	-1.01035	A0A0B5ZCK3	3443	Asparagine--tRNA ligase GN=asnS	25	25	25	64.8	64.8	64.8	52.925	0	108.49	1044100000	85	95205000	410920000	143840000	529560	687930	0	64519000	163990000	162930000	674560	806170	0	25	25	25	-0.467324	-0.302803	0.0211371	-5.47168	-5.69627	-5.13231	-0.804947	-1.03542	-0.915674	-6.36548	-2.9658	-3.93792
	0.245162	-1.01232	Q4MJ63	4184	Methionyl-tRNA formyltransferase GN=fmt	10	10	10	53.5	53.5	53.5	34.722	0	80.906	331260000	40	26808000	94431000	37954000	0	0	0	40733000	60341000	70996000	0	0	0	10	10	10	-2.26777	-2.19868	-1.80215	-5.79336	-4.71346	-5.81391	-1.85702	-2.26697	-2.00516	-7.53119	-2.26755	-3.48504
	0.325086	-1.0136	A0A0B5Z6V4	2525	DNA gyrase subunit A GN=gyrA	10	10	10	15.2	15.2	15.2	92.336	0	27.284	172770000	23	27858000	47726000	35355000	996220	3911700	1016500	3863300	46235000	4258600	0	0	1551100	10	10	10	-2.32082	-2.71125	-2.35809	-5.11845	-5.3462	-5.60423	-4.67785	-2.53256	-5.05953	-6.30888	-1.95814	-4.76106
	0.258372	-1.03531	Q4MJ66	2564	Probable dual-specificity RNA methyltransferase RlmN GN=rlmN	9	9	9	22.9	22.9	22.9	41.538	0	24.331	190170000	30	20703000	76939000	19225000	0	0	0	9431800	18050000	45819000	0	0	0	9	9	9	-3.13917	-2.59502	-2.85656	-5.97037	-5.72412	-3.84108	-3.61868	-3.70708	-3.09807	-7.00716	-3.0597	-2.36278
	0.446968	-1.03557	Q4MGT1	2651	Agmatinase GN=speB	8	8	8	40	40	40	32.389	0	66.562	260830000	54	23413000	65532000	31940000	2419700	6680000	0	21045000	41379000	29675000	37273000	0	1473800	8	8	8	-2.64778	-2.55052	-3.14625	-2.9033	-3.43333	-6.05344	-3.78207	-2.29614	-3.2171	-2.68574	-3.3854	-3.21223
	0.570603	-1.03879	Q4MGR7	659	Hemolytic enterotoxin family protein GN=AQ16_659	39	39	39	76.1	76.1	76.1	43.117	0	323.31	16762000000	618	2249800000	9759700000	3314600000	41029000	77618000	22557000	301350000	231940000	403230000	166000000	12120000	181570000	39	39	39	3.90784	4.45977	3.65327	-0.0149251	-0.00279372	0.501202	0.713328	-0.457766	0.435511	0.536587	0.286732	2.77654
	1.48208	-1.03966	Q4MU23	241	2-methylisocitrate lyase GN=prpB	8	8	8	42.1	42.1	42.1	32.962	0	52.003	42774000	13	0	0	0	3433900	3851800	1474500	0	0	1608600	31963000	441880	0	8	8	8	-4.89784	-7.267	-5.6256	-3.55871	-4.01661	-3.43918	-3.81895	-6.29048	-5.84327	-2.32223	-2.3965	-3.17679
	0.436102	-1.04468	Q4MMC6	1275	Enoyl-[acyl-carrier-protein] reductase [NADH] GN=fabI	21	21	21	85.5	85.5	85.5	27.709	0	250.65	7500400000	230	927000000	1992400000	862380000	2388000	422890	1279900	720130000	1500700000	1485800000	3090700	696180	4143800	21	21	21	2.81538	2.41421	2.37403	-5.88292	-7.21376	-5.71515	2.13213	2.40448	2.45394	-6.86504	-3.71957	-5.0932
	0.259223	-1.04576	Q4MKB2	4242	30S ribosomal protein S15 GN=rpsO	5	5	5	57.3	57.3	57.3	10.56	0	85.246	1713000000	47	235430000	525640000	297590000	506460	0	0	86851000	244690000	322270000	0	0	0	5	5	5	0.803662	0.530254	0.703347	-6.87899	-5.88427	-5.53818	-0.524046	0.106259	0.28209	-8.1513	-3.25293	-3.75996
	0.269665	-1.05109	Q4MVT1	3351	Probable tRNA sulfurtransferase GN=thiI	11	11	11	31.7	31.7	31.7	45.856	0	41.23	240460000	37	19278000	101510000	37490000	0	0	0	13586000	30193000	38403000	0	0	0	11	11	11	-2.48729	-2.3354	-2.20703	-6.07724	-8.17326	-3.90704	-2.53776	-3.24296	-2.46818	-6.86984	-4.43374	-3.70069
	0.483456	-1.06228	Q4MNV8;Q4MWZ4	3753; 4975	Penicillin binding transpeptidase domain protein GN=AQ16_3753	39	39	39	57.4	57.4	57.4	79.631	0	164.92	1976100000	211	190990000	281280000	218620000	648540	1207200	469850	376340000	611340000	294290000	403880	556780	0	NaN	NaN	NaN	0.228666	-0.459279	0.14336	-6.76488	-6.56871	-4.75916	1.16559	0.851748	0.0496079	-6.38373	-4.14385	-4.37833
	0.98081	-1.06406	A0A0B5Z2W2	5234	Uncharacterized protein GN=AQ16_5234	10	10	10	42.4	42.4	42.4	31.177	0	53.988	162180000	30	14416000	45906000	20934000	160110	984360	0	31880000	18814000	23648000	5434900	0	0	10	10	10	-3.37531	-3.89475	-3.96306	-6.46867	-5.27992	-4.82457	-3.10819	-3.04605	-2.41084	-4.30805	-4.34241	-4.73052
	0.384638	-1.08205	Q4MND5	3165	Putative lipid kinase BmrU GN=AQ16_3165	6	6	6	21.3	21.3	21.3	32.817	0	10.334	84983000	15	4056300	5990000	7881600	0	0	0	10041000	29342000	27672000	0	0	0	6	6	6	-5.18894	-6.40782	-4.16979	-5.09209	-6.40916	-6.2845	-3.48292	-3.17956	-3.55374	-7.0426	-3.50523	-3.99176
	0.407533	-1.10844	Q4MN79	3111	L-lactate dehydrogenase GN=ldh	9	9	4	44.3	44.3	27.1	34.62	0	33.222	460180000	33	31424000	75634000	48050000	0	426450	246890	60251000	104270000	139880000	0	0	0	4	9	9	-1.88057	-2.41363	-2.05327	-5.80659	-4.16809	-7.16859	-1.24367	-1.96381	-1.45861	-6.02782	-4.36749	-3.42263
	0.38835	-1.13271	Q4MK30	1239	Dihydrolipoyllysine-residue succinyltransferase component of 2-oxoglutarate dehydrogenase complex GN=sucB	4	4	4	17.2	17.2	17.2	45.301	0	13.056	71383000	12	2189600	15181000	5723200	0	0	0	7502500	16364000	24422000	0	0	0	4	4	4	-7.23997	-4.13625	-6.07736	-5.4826	-5.13464	-6.30756	-3.66263	-4.53878	-3.67982	-6.85062	-3.57681	-3.09924
	2.94406	-1.13616	A0A0B5Z7L1	fhs	Formate--tetrahydrofolate ligase GN=fhs	31	31	31	61.7	61.7	61.7	62.71	0	292.21	1856800000	298	38284000	114090000	52803000	126270000	131060000	66307000	80664000	182380000	87233000	596960000	110390000	270360000	31	31	31	-1.36926	-1.52979	-1.01464	1.10589	0.959892	0.916127	-0.614528	-0.45975	-1.42976	2.21302	2.29079	1.88657
	0.468189	-1.1399	A0A0B5ZH44	4206	30S ribosomal protein S16 GN=rpsP	6	6	6	58.9	58.9	58.9	10.118	0	323.31	968020000	60	48004000	204200000	85509000	0	0	0	104400000	277450000	247680000	770300	0	0	6	6	6	-1.83887	-0.952114	-1.40163	-6.43353	-5.99652	-5.83566	-1.08147	-0.25362	-0.689169	-7.01045	-4.13663	-3.69891
	0.617836	-1.14176	A0A0B5YYT6	2661	Collagen binding domain protein GN=AQ16_2661	52	52	51	42.2	42.2	38.3	205.71	0	323.31	2272800000	305	231750000	677150000	283890000	41958000	39305000	27301000	262670000	361190000	135160000	78098000	79425000	54950000	51	52	52	0.507743	0.542581	0.0963542	-0.270113	-0.959871	-0.120183	0.245173	-0.108801	-1.0077	-0.629024	2.09995	0.604187
	0.779037	-1.14311	Q4MPS4	2228	tRNA N6-adenosine threonylcarbamoyltransferase GN=tsaD	3	3	3	13.6	13.6	13.6	36.003	0	18.778	33034000	5	7770200	17414000	7230000	0	0	0	619710	0	0	0	0	0	3	3	3	-4.04836	-4.41733	-4.31739	-5.44793	-5.79058	-6.41454	-5.28403	-4.7863	-5.52398	-5.93557	-3.89342	-4.39475
	0.339408	-1.15255	Q4MLH1	2550	50S ribosomal protein L9 GN=rplI	5	5	5	33.8	33.8	33.8	16.383	0	10.383	289520000	18	11101000	23766000	14139000	0	0	0	47832000	107680000	85008000	0	0	0	5	5	5	-2.5285	-2.80847	-3.42614	-6.61343	-5.67657	-5.44812	-2.1024	-1.38692	-1.8784	-7.47237	-3.29191	-3.5162
	0.268859	-1.15984	Q4MSP2	1075	Acetohydroxy acid isomeroreductase, catalytic domain protein GN=AQ16_1075	9	9	9	42.1	42.1	42.1	35.301	0	34.001	138220000	31	15954000	37027000	14329000	0	1345700	0	4765900	19579000	45042000	0	0	176270	9	9	9	-3.81184	-3.54514	-3.47117	-5.17133	-6.72456	-6.40327	-4.55102	-3.80729	-2.90691	-7.91707	-4.72359	-2.17896
	0.41508	-1.16515	Q4MSG5	1148	7-cyano-7-deazaguanine synthase GN=queC	6	6	6	27.7	27.7	27.7	24.513	0	25.344	206520000	23	22885000	35611000	10155000	0	0	0	22467000	48238000	67164000	0	0	0	6	6	6	-3.21501	-3.38781	-3.85384	-5.73202	-6.22197	-5.22168	-2.82958	-2.8497	-2.68718	-6.83369	-3.03322	-3.81331
	0.513726	-1.17472	Q4MSU5	959	4-hydroxy-tetrahydrodipicolinate reductase GN=dapB	7	7	7	37.6	37.6	37.6	29.247	0	21.532	157860000	35	12138000	24171000	13832000	0	0	153030	6523600	52236000	47987000	817620	0	0	7	7	7	-3.60425	-3.80048	-3.42506	-5.3012	-5.99804	-5.1749	-3.15288	-3.23126	-3.29537	-6.24707	-3.19414	-3.50876
	0.285584	-1.18141	A0A0B5ZET2	3441	Phenylalanine--tRNA ligase alpha subunit GN=pheS	5	5	5	17.2	17.2	17.2	38.945	0	11.696	74442000	15	9240500	26159000	2052900	0	0	0	5363600	6757900	24868000	0	0	0	5	5	5	-4.18023	-4.05942	-5.00599	-4.93971	-7.08437	-4.34176	-4.09921	-4.54769	-3.79995	-7.16647	-2.7878	-2.86735
	0.700391	-1.18638	Q4MP00	3716	Ribosomal protein L11 methyltransferase GN=prmA	11	11	11	59.3	59.3	59.3	33.756	0	82.753	342400000	39	36309000	147390000	18090000	0	0	0	25368000	57398000	57839000	0	0	0	11	11	11	-2.56234	-1.77637	-2.95115	-4.98122	-5.23127	-5.88394	-2.20168	-1.82073	-2.2187	-5.54996	-3.89751	-3.08983
	0.389619	-1.19068	Q4MGI9	2689	Thymidine kinase GN=tdk	4	4	4	35.6	35.6	35.6	21.643	0	12.49	113530000	17	4650700	32439000	1817400	0	0	0	15745000	36166000	22317000	0	397680	0	4	4	4	-3.6597	-3.96371	-5.91948	-6.30435	-7.12115	-3.91496	-3.39562	-3.1891	-3.13109	-6.20165	-4.28864	-3.27812
	0.348113	-1.19133	Q4MH86	cysK	Cysteine synthase GN=cysK	15	15	14	73	73	69.4	32.924	0	79.53	300720000	47	16792000	34359000	32835000	417170	946280	497560	40975000	81370000	92526000	0	0	0	14	15	15	-2.64157	-2.71771	-2.54759	-6.58431	-5.82071	-5.74916	-2.07017	-1.89094	-1.65587	-7.62281	-3.14968	-3.80771
	0.950856	-1.19227	A0A0B5ZD86	2516	Inosine-5-monophosphate dehydrogenase GN=guaB	38	38	38	87.5	87.5	87.5	52.388	0	272.2	3102400000	221	227230000	631050000	409320000	786700	1692200	586730	440650000	721430000	661670000	7084200	844280	0	38	38	38	0.848772	0.899653	1.35971	-5.66822	-4.83322	-4.75172	1.81226	0.877145	0.887603	-4.32255	-2.87894	-4.47486
	0.653573	-1.19457	Q4MGF0	2625	Cof-like hydrolase family protein GN=AQ16_2625	5	5	5	27.1	27.1	27.1	30.519	0	42.429	117640000	25	14609000	33757000	7460100	0	0	0	4109600	26577000	31122000	0	0	0	5	5	5	-3.29271	-3.8208	-3.30443	-7.32174	-7.18603	-4.99621	-3.63482	-4.00276	-3.78127	-5.79642	-4.65265	-5.47121
	0.423406	-1.20424	A0A0B5Z9B6	2887	Ribonuclease R GN=rnr	8	8	8	13	13	13	91.946	0	16.065	101820000	19	20394000	46250000	9905600	2105200	3838400	524900	3746900	13398000	0	1659200	0	0	8	8	8	-2.89862	-3.1665	-4.32266	-7.60501	-3.84568	-5.82247	-5.80041	-4.45741	-6.38224	-5.19633	-3.47562	-4.98848
	0.422544	-1.20593	A0A0B5Z5X5	3430	50S ribosomal protein L35 GN=rpmI	4	4	4	50	50	50	7.4958	0	55.964	185090000	24	26260000	71027000	28407000	0	0	0	4401700	12476000	42514000	0	0	0	4	4	4	-2.38732	-2.33418	-2.62381	-6.71971	-5.40846	-5.22611	-5.49558	-4.02513	-2.81806	-6.82271	-3.37888	-3.5349
	0.591913	-1.20766	A0A0B5Z632	3442	Phenylalanine--tRNA ligase beta subunit GN=pheT	25	25	25	43.2	43.2	43.2	88.48	0	169.89	547190000	75	61743000	197540000	65108000	0	0	2298100	55489000	116950000	44401000	3662600	0	0	25	25	25	-1.1401	-1.1289	-1.45877	-5.53897	-7.18404	-5.61609	-0.946266	-1.22018	-2.34914	-6.13966	-4.98772	-3.58875
	1.16837	-1.2177	Q4MGT7	2645	YwhD family protein GN=AQ16_2645	4	4	4	33.1	33.1	33.1	19.027	0	20.06	145750000	26	10316000	22890000	6367400	8793100	9099500	6852900	7671100	42226000	21154000	0	3192600	7189100	4	4	4	-3.8198	-4.06732	-3.48387	-5.31056	-5.98702	-5.5267	-4.08896	-3.27841	-3.77595	-4.79869	-3.49624	-4.87623
	0.673584	-1.22513	Q4MM56	1339	UPF0234 protein AQ16_1339 GN=AQ16_1339	9	9	9	49.7	49.7	49.7	18.459	0	34.027	376190000	52	32879000	82517000	26272000	0	696270	0	45988000	95793000	92047000	0	0	0	9	9	9	-1.80128	-2.13261	-2.01364	-6.45114	-6.06504	-5.57805	-1.77218	-1.6414	-1.66831	-6.36658	-3.8585	-4.19375
	1.15404	-1.2275	Q4MSG8	1145	NADPH-dependent 7-cyano-7-deazaguanine reductase GN=queF	6	6	6	41.8	41.8	41.8	19.528	0	18.212	131020000	15	10456000	18289000	11583000	0	0	0	17122000	37766000	33588000	2220400	0	0	6	6	6	-3.76346	-3.87323	-3.91344	-5.79805	-5.80807	-4.47576	-3.82357	-2.65679	-3.39234	-4.4887	-3.69363	-4.21705
	0.476975	-1.2327	Q4MPK7	1392	Beta-channel forming cytolysin family protein GN=AQ16_1392	12	12	12	67.7	67.7	67.7	37.1	0	209.84	1067700000	75	121720000	714520000	139500000	0	353950	217500	24028000	32784000	34550000	0	0	0	12	12	12	-0.100192	0.705914	-0.364751	-5.72059	-7.05955	-4.33409	-2.07926	-2.61418	-3.15397	-6.06137	-3.82638	-3.52837
	0.440861	-1.24246	Q4MH25	2368	30S ribosomal protein S11 GN=rpsK	10	10	10	69.8	69.8	69.8	13.739	0	148.71	2343900000	100	293490000	716140000	389510000	477520	878150	464470	148620000	486660000	305650000	1994100	0	0	10	10	10	1.20149	1.05905	1.07428	-6.96709	-6.82372	-4.18902	-1.75542	0.467338	0.191029	-6.34274	-4.1581	-3.75163
	0.62412	-1.24747	Q4MIS9	5839	N-acetylmuramoyl-L-alanine amidase family protein GN=AQ16_5839	6	6	6	30.8	30.8	30.8	27.565	0	43.571	386340000	47	0	975210	0	1409700	2885400	1133700	69195000	144130000	139260000	18522000	2010900	6809600	6	6	6	-4.14891	-6.55462	-5.7745	-5.81912	-3.92186	-5.08024	-1.02611	-1.36916	-1.12563	-2.28105	-4.52458	-4.27318
	0.651796	-1.24789	A0A0B5YSN6	2526	DNA gyrase subunit B GN=gyrB	7	7	7	16.1	16.1	16.1	71.896	0	20.223	90962000	17	7893200	24084000	11934000	0	0	0	13048000	30897000	3105700	0	0	0	7	7	7	-3.70008	-4.75188	-3.52458	-6.72077	-6.44657	-6.17402	-3.24688	-3.25572	-6.07096	-6.88214	-4.13403	-4.58153
	0.670358	-1.24792	Q4MKB7	4237	Translation initiation factor IF-2 GN=infB	36	36	36	53.1	53.1	53.1	75.753	0	161.45	1452500000	118	221760000	471480000	253080000	0	2897700	0	157800000	263510000	79064000	1026100	1912200	0	36	36	36	0.749381	0.191823	0.584348	-5.86013	-7.17146	-5.46007	-0.0290952	-0.0243676	-1.52745	-5.81044	-3.60918	-5.32828
	0.791725	-1.25092	A0A0B5ZEA8	3433	Putative aminopeptidase ysdC GN=AQ16_3433	11	11	10	41.8	41.8	39.9	39.469	0	134.28	278210000	52	0	16029000	2225400	16026000	17704000	7488100	3353400	14608000	38712000	144190000	5502500	12373000	10	11	11	-6.36649	-4.07144	-6.37539	-2.17227	-1.88101	-2.50091	-4.77192	-3.9747	-3.31314	0.446566	-1.89093	-1.35706
	0.436141	-1.25626	Q4MXM4	4754	Extracellular ribonuclease GN=bsn	9	9	9	42.5	42.5	42.5	31.175	0	29.262	166990000	23	36509000	77170000	53040000	0	0	0	0	0	0	0	272910	0	9	9	9	-1.9285	-2.19175	-1.95743	-5.65671	-6.14611	-4.55286	-6.23316	-5.62373	-7.15676	-6.45526	-3.33921	-2.79243
	0.33193	-1.28603	A0A0B5ZC88	2157	Glutamyl-tRNA(Gln) amidotransferase subunit A GN=gatA	16	16	16	43.3	43.3	43.3	52.32	0	125.27	670700000	72	44057000	182600000	92978000	2171700	1193300	0	62188000	122650000	159800000	1870300	0	1199900	16	16	16	-1.73715	-1.2479	-1.26885	-6.40629	-6.77684	-6.46808	-1.40102	-1.03561	-0.503448	-8.44899	-3.65524	-3.68888
	1.24901	-1.29455	A0A0B5Z245	3491	5-nucleotidase, lipoprotein e(P4) family GN=AQ16_3491	10	10	10	34.5	34.5	34.5	30.976	0	42.623	150570000	31	782220	3798600	1538600	5591800	10672000	6419200	0	0	0	83322000	10257000	28191000	10	10	10	-5.59228	-4.78463	-5.537	-2.21439	-2.70492	-1.67879	-4.67614	-5.82365	-5.44609	-0.232394	-0.912732	-1.56932
	0.428622	-1.29991	Q4MGJ0	2688	50S ribosomal protein L31 type B GN=rpmE	4	4	4	65.4	65.4	65.4	9.1842	0	85.451	223710000	26	14548000	71340000	31454000	0	0	0	9602900	41953000	52878000	1930000	0	0	4	4	4	-3.03814	-2.87095	-2.16713	-5.42759	-7.25053	-4.85772	-3.60451	-2.86746	-2.78839	-6.69915	-3.4772	-3.45977
	2.02448	-1.30267	Q4MXJ1	4789	Uncharacterized protein GN=AQ16_4789	6	6	6	19.7	19.7	19.7	40.429	0	18.042	37799000	13	1994300	1169300	876560	1966500	2060000	1151000	0	0	3919600	13077000	0	11585000	6	6	6	-7.14049	-5.37463	-5.69993	-4.75156	-4.92566	-4.2067	-5.32758	-6.17091	-4.45373	-3.20886	-3.09779	-3.66926
	0.873291	-1.30276	A0A0B5Z535	2222	60 kDa chaperonin GN=groL	68	68	68	94.1	94.1	94.1	57.459	0	323.31	69797000000	2177	2606700000	4857200000	5142900000	428130000	348290000	140250000	14083000000	23712000000	14297000000	1371400000	210410000	2599900000	68	68	68	4.12454	3.68623	4.47959	3.23633	2.73194	2.95824	6.21572	6.29851	5.45168	3.40178	3.81844	5.61458
	0.42204	-1.30727	Q4MJM2	3693	Ribosome biogenesis GTPase YqeH GN=yqeH	7	7	7	21.5	21.5	21.5	41.301	0	24.8	75511000	13	12544000	38827000	9413600	0	0	0	1105800	1477300	12144000	0	0	0	7	7	7	-3.7217	-3.75522	-3.49164	-6.20133	-6.53475	-5.29487	-5.19779	-6.32029	-3.59754	-7.12354	-2.83716	-4.14844
	0.642632	-1.31199	Q4MI16	2476	Pur operon repressor PurR GN=purR	7	7	7	31.2	31.2	31.2	31.066	0	30.626	153990000	36	15256000	33653000	20628000	0	0	1350300	11164000	31882000	40061000	0	0	0	7	7	7	-3.34149	-3.14856	-2.99753	-6.2195	-6.04418	-5.01483	-3.5784	-2.88968	-3.08247	-6.12926	-3.66835	-3.54494
	0.596159	-1.31825	A0A0B5Z5D2	2392	50S ribosomal protein L23 GN=rplW	13	13	13	85.4	85.4	85.4	11.114	0	71.915	862260000	58	79802000	257180000	72799000	281650	324960	0	70461000	214520000	166880000	0	0	0	13	13	13	-0.449748	-0.526401	-0.724778	-6.52816	-5.4211	-5.93503	-1.281	-0.453158	-0.95886	-6.40963	-4.29594	-3.22397
	2.7174	-1.32377	Q4MS77	3551	ATP-dependent Clp protease ATP-binding subunit ClpX GN=clpX	19	19	19	51.3	51.3	51.3	46.197	0	190.58	1055200000	77	86968000	262450000	179360000	0	0	0	94591000	190390000	235670000	5539500	0	191550	19	19	19	-0.425472	-0.498931	0.359754	-5.11956	-5.64165	-5.27773	-0.430255	-0.847714	-0.378352	-3.98466	-3.87673	-4.20622
	0.556797	-1.32803	Q4MKC4	proS	Proline--tRNA ligase GN=proS	18	18	18	45.9	45.9	45.9	63.081	0	129.04	462500000	80	63180000	128990000	82840000	0	0	0	37628000	125070000	24788000	0	0	0	18	18	18	-1.48703	-1.68153	-1.41055	-5.70099	-5.52838	-6.09893	-1.96647	-1.77505	-2.80985	-6.53498	-3.36265	-3.44656
	0.992633	-1.33091	Q4MRC0	3063	Glycine--tRNA ligase GN=glyS	16	16	16	38.6	38.6	38.6	53.018	0	41.711	318340000	40	14786000	98025000	42209000	0	0	0	33659000	59736000	69929000	0	0	0	16	16	16	-2.4412	-2.41126	-2.12508	-5.23625	-5.49934	-5.38399	-1.99291	-2.2405	-2.11393	-5.28649	-3.50692	-3.33343
	0.451703	-1.33497	A0A0B5Z0B9	1440	Glycerol kinase GN=glpK	11	11	11	29.4	29.4	29.4	55.073	0	180.56	492730000	51	47064000	204380000	103260000	0	635620	0	40003000	40500000	56479000	0	403120	0	11	11	11	-1.56042	-1.12525	-0.951997	-5.07407	-5.61621	-5.36944	-1.7911	-2.02515	-1.8846	-6.54269	-2.83697	-2.67517
	1.71641	-1.34229	Q4MRH3	496	Bacterial extracellular solute-binding s, 5 Middle family protein GN=AQ16_496	13	13	13	32.7	32.7	32.7	63.001	0	52.487	157260000	44	0	0	0	7320900	15984000	7772500	942830	481990	0	96995000	7921000	19841000	13	13	13	-6.39733	-5.42731	-6.30513	-2.29254	-1.56197	-1.9367	-5.45216	-5.56812	-5.1889	-1.13426	-0.179173	-0.450899
	0.719852	-1.35274	Q4MQ21	2911	NADH dehydrogenase-like protein yjlD GN=yjlD	17	17	17	65.6	65.6	65.6	41.635	0	174.51	1245300000	166	128040000	408860000	179480000	24662000	44832000	16364000	55425000	74311000	88167000	84084000	37168000	103940000	17	17	17	-0.623563	-0.432576	-0.515491	-0.483678	-1.23779	-0.220427	-1.64959	-1.97472	-1.39377	-0.844171	1.11124	1.84926
	1.14533	-1.35505	Q4ML87	5099	ABC transporter family protein GN=AQ16_5099	26	26	26	48.6	48.6	48.6	61.099	0	151.92	1014500000	107	125400000	331500000	228280000	0	999190	0	98542000	157920000	68942000	2935300	0	0	26	26	26	-0.811479	0.0668977	0.292537	-6.76158	-5.48454	-4.9811	0.00198692	-1.5267	-2.28244	-4.40633	-4.6712	-4.08453
	0.91955	-1.35642	A0A0B5Z6H1	2448	Dihydropteroate synthase GN=folP	4	4	4	19.1	19.1	19.1	30.598	0	48.342	57175000	10	0	2298200	0	0	0	0	9297500	19375000	26205000	0	0	0	4	4	4	-5.72135	-5.74586	-6.34719	-6.48954	-6.31299	-5.07498	-3.57397	-3.82317	-3.50831	-5.52139	-3.69949	-4.58738
	0.8467	-1.35736	Q4MVA9	3186	Uncharacterized protein GN=AQ16_3186	7	7	7	25.9	25.9	25.9	29.688	0	18.708	111640000	13	11015000	23711000	9892100	593610	197350	571940	15704000	16186000	33772000	0	0	0	7	7	7	-3.72258	-4.16189	-3.6987	-6.47251	-7.0547	-5.58532	-3.15288	-3.59164	-3.49558	-6.0293	-5.08969	-3.92145
	0.459251	-1.37477	Q4MT96	4138	UDP-N-acetylmuramoylalanine--D-glutamate ligase GN=murD	20	20	20	61.1	61.1	61.1	48.8	0	90.197	611130000	63	48385000	124830000	61259000	0	391220	0	63393000	153670000	159200000	0	0	0	20	20	20	-1.38496	-1.50883	-1.44885	-6.35947	-5.74051	-6.51089	-1.20288	-1.19722	-1.15095	-7.26757	-2.99124	-4.22774
	0.66412	-1.38118	Q4MIY2	2156	Aspartyl/glutamyl-tRNA(Asn/Gln) amidotransferase subunit B GN=gatB	15	15	15	34.9	34.9	34.9	53.237	0	49.682	352240000	54	24452000	72914000	32196000	1355900	0	0	52691000	99176000	68441000	1014100	0	0	15	15	15	-2.17587	-2.13698	-1.94783	-5.99535	-6.33696	-5.61845	-1.95435	-2.04707	-2.00589	-6.40934	-3.40304	-3.99485
	2.23482	-1.38613	Q4MRB4	pgcA	Phosphoglucomutase GN=pgcA	37	37	37	70	70	70	64.238	0	323.31	2791700000	242	124920000	254260000	143300000	137630000	165030000	65567000	283300000	753160000	268500000	380390000	51868000	163810000	37	37	37	0.317046	0.229216	-0.189846	0.692336	0.50986	0.751078	0.773073	1.26076	0.0164292	1.55768	2.16793	2.38607
	0.858868	-1.39314	A0A0B5ZDS6	tpx	Probable thiol peroxidase GN=tpx	12	12	12	93.4	93.4	93.4	17.936	0	157.44	1669600000	117	96110000	319250000	133250000	1064500	2566500	762460	211740000	533590000	367160000	4110300	0	0	12	12	12	-0.760585	-0.501116	-0.653898	-5.32975	-4.46724	-5.89413	0.314173	0.92432	0.405263	-4.86233	-3.95825	-2.6911
	0.768629	-1.39331	Q4MQ70	5264	ATP-dependent Clp protease proteolytic subunit GN=clpP	6	6	6	26.9	26.9	26.9	21.419	0	14.416	171510000	21	22072000	73527000	25428000	0	550550	0	5545300	24741000	18895000	755770	0	0	6	6	6	-3.14956	-3.02794	-3.01351	-6.05459	-7.02144	-6.33227	-4.48778	-3.40685	-3.27346	-6.63716	-4.17593	-4.41528
	0.734762	-1.39562	Q4MGG8	5831	Putative major capsid protein gpP GN=AQ16_5831	11	11	11	81	81	81	16.144	0	46.266	404230000	28	1179700	3716400	3094700	0	0	0	52040000	215910000	125520000	2772200	0	0	11	11	11	-5.84456	-3.64074	-4.26494	-4.28864	-6.91023	-5.62996	-1.75089	-0.211093	-1.55957	-4.92481	-3.43871	-4.27846
	0.501162	-1.39826	Q4MII6	2783	Cell wall hydrolase GN=AQ16_2783	47	47	47	84.8	84.8	84.8	61.123	0	323.31	22463000000	439	2576400000	4798900000	3293700000	4146600	1552900	3255900	4318100000	5431200000	2021200000	12001000	2156200	0	47	47	47	4.35316	3.57309	4.2364	-6.19299	-8.05868	-4.75039	4.75324	4.39748	3.02819	-5.9681	-5.37306	-3.46611
	0.624932	-1.40121	Q4MVN1	3305	UDP-N-acetylmuramate--L-alanine ligase GN=murC	14	14	14	35.1	35.1	35.1	49.256	0	47.885	342010000	39	33747000	148560000	50950000	0	0	0	12327000	40031000	56389000	0	0	0	14	14	14	-2.31604	-1.36105	-2.2636	-4.90508	-7.24399	-5.92605	-2.99591	-2.49165	-1.87098	-6.05265	-4.29284	-3.52601
	0.539093	-1.41161	A0A0B5Z082	2530	Chromosomal replication initiator protein DnaA GN=dnaA	7	7	7	19.5	19.5	19.5	50.526	0	15.859	96123000	24	5692300	30292000	10849000	3690800	4034200	0	3260700	18932000	19372000	0	0	0	7	7	7	-4.1253	-3.99464	-3.94608	-5.49512	-6.72288	-5.40061	-4.20463	-4.01678	-4.25357	-6.60976	-3.42056	-3.35346
	0.350913	-1.4185	A0A0B5Z5S4	3051	FAD dependent oxidoreductase family protein GN=AQ16_3051	6	6	6	22.9	22.9	22.9	44.303	0	18.509	253450000	31	33144000	103640000	39488000	0	0	0	11274000	23399000	42499000	0	0	0	6	6	6	-2.22885	-2.24236	-2.22359	-4.94629	-8.98554	-6.20943	-2.90022	-3.28851	-2.56771	-7.62044	-3.76968	-4.49563
	0.391142	-1.42291	Q4MJ78	3851	Bifunctional protein FolD GN=folD	7	7	7	32.5	32.5	32.5	31.09	0	19.352	110240000	19	10910000	30895000	14609000	0	0	0	13256000	15244000	25326000	0	0	0	7	7	7	-3.68486	-3.90716	-3.66398	-6.0625	-6.10935	-6.39501	-2.93188	-6.12922	-5.72275	-7.82357	-3.08984	-3.38471
	1.56831	-1.42589	Q4MJF5	2132	Peroxiredoxin GN=ahpC	14	14	14	80.7	80.7	80.7	20.706	0	323.31	4897100000	402	261270000	741680000	285690000	106910000	127060000	55631000	457200000	1212500000	868210000	552720000	99865000	128330000	14	14	14	0.515426	0.528568	-0.125394	0.477014	0.250669	1.16779	0.977815	1.53689	1.13288	1.66246	2.67847	1.83221
	0.438609	-1.42651	Q4MGL7	2485	Transition state regulatory protein AbrB GN=abrB	3	3	3	33	33	33	10.49	0	231.02	141720000	21	10903000	31823000	12548000	0	0	0	13042000	50942000	22465000	0	0	0	3	3	3	-3.47404	-3.28979	-3.60417	-4.45709	-7.15729	-6.49846	-3.3571	-2.62506	-3.42797	-6.69631	-2.79839	-4.33861
	1.09406	-1.44319	Q4MGD7	2375	50S ribosomal protein L15 GN=rplO	12	12	12	65.1	65.1	65.1	15.492	0	131.58	1830100000	78	175790000	429330000	191570000	279480	2661000	0	153010000	515570000	361940000	0	0	0	12	12	12	0.406791	0.193859	0.123695	-5.41158	-4.45016	-4.75451	0.252111	0.882661	0.46754	-4.41344	-2.50583	-3.36742
	0.727901	-1.45098	Q4MM10	2831	Cell division ATP-binding protein FtsE GN=ftsE	10	10	10	56.5	56.5	56.5	23.56	0	45.149	501410000	40	51923000	101580000	49555000	0	0	0	60364000	114540000	123440000	0	0	0	10	10	10	-1.66812	-1.7654	-1.39862	-4.81816	-6.45781	-5.88561	-1.49589	-1.32165	-1.15997	-5.76746	-3.87271	-3.16848
	0.815453	-1.46985	Q4MJK1	3714	Chaperone protein DnaK GN=dnaK PE=2 SV=1	51	51	51	74.5	74.5	74.5	65.765	0	323.31	9914000000	503	844830000	1591900000	933130000	8254300	12976000	2995100	1747400000	3487000000	1187300000	75816000	4479300	17884000	51	51	51	2.65884	2.147	2.36384	-3.32572	-3.39032	-4.02408	3.46914	3.65175	2.218	-0.652631	-3.42766	-2.25028
	0.870108	-1.47197	Q4MQN2	aspA	Aspartate ammonia-lyase GN=aspA	6	4	4	18	13.8	13.8	52.528	0	8.0735	56838000	8	10224000	26866000	12632000	548750	0	179540	2246500	2446800	1694000	0	0	0	4	4	6	-3.82509	-4.0248	-3.23228	-6.53183	-7.52059	-6.44076	-5.91354	-5.8046	-5.72218	-6.77353	-4.64394	-4.65981
	0.609565	-1.47224	Q4MUR7	665	UPF0176 protein AQ16_665 GN=AQ16_665	7	7	7	25.1	25.1	25.1	36.718	0	16.233	96591000	14	4493400	23944000	14037000	0	0	0	12866000	11876000	29375000	0	0	0	7	7	7	-5.66176	-4.29343	-3.56462	-5.56386	-7.92094	-4.67212	-2.91304	-4.05802	-3.90226	-4.91462	-3.62598	-5.1996
	0.657102	-1.47311	A0A0B5ZIU3	mtnN	5-methylthioadenosine/S-adenosylhomocysteine nucleosidase GN=mtnN	12	12	12	67.1	67.1	67.1	25.3	0	117.74	807590000	99	68295000	160670000	43843000	1017600	0	829910	77315000	238310000	212590000	0	4724100	0	12	12	12	-0.983812	-1.27773	-1.3121	-5.95134	-6.37838	-4.75447	-1.13693	-0.852716	-0.74126	-5.8547	-2.78813	-4.02202
	0.519375	-1.47803	Q4MKQ4	4520	Beta-lactamase enzyme family protein GN=AQ16_4520	6	6	6	20.3	20.3	20.3	42.132	0	14.241	116120000	17	13249000	16956000	9660700	0	0	0	12861000	36389000	27003000	0	0	0	6	6	6	-3.43897	-4.11766	-3.65564	-6.34944	-6.38063	-5.9044	-3.36832	-3.50471	-3.40046	-7.15126	-4.00428	-3.04484
	0.588796	-1.485	A0A0B5ZBM5	2383	50S ribosomal protein L24 GN=rplX	14	14	14	90.3	90.3	90.3	11.228	0	169.6	2792600000	128	316710000	748770000	396830000	0	0	0	217370000	619680000	493250000	0	0	0	14	14	14	1.18507	0.865511	1.26722	-6.8399	-5.72041	-5.66361	0.524817	1.08371	0.681566	-6.6562	-3.15347	-3.95924
	1.24469	-1.48951	A0A0B5Z0H0	gap	Glyceraldehyde-3-phosphate dehydrogenase GN=gap	27	27	27	78.1	78.1	78.1	35.825	0	323.31	9540200000	321	690580000	1682000000	866660000	1002600	2286900	861500	1250500000	1940300000	3088200000	17273000	388470	114000	27	27	27	2.41327	2.3042	2.32185	-4.14698	-5.92345	-5.41519	2.05444	2.75245	3.59075	-3.85785	-3.2894	-3.86985
	0.727724	-1.49101	Q4MGH5	5822	Phage family protein GN=AQ16_5822	9	9	9	61.9	61.9	61.9	16.593	0	170.45	578530000	36	0	0	3357500	0	1512600	0	53641000	379740000	137350000	0	2928300	0	9	9	9	-6.6958	-5.24542	-5.37337	-5.96646	-6.35048	-5.09433	-0.985909	0.321358	-0.838828	-5.81593	-2.83225	-4.29004
	0.878269	-1.50403	A0A0B5ZF28	2388	30S ribosomal protein S3 GN=rpsC	29	29	29	73.1	73.1	73.1	24.294	0	226.78	5400800000	211	793930000	1789200000	764690000	3110600	5551900	2181200	369380000	754200000	892520000	20048000	4914500	1006500	29	29	29	2.62336	2.27023	2.24284	-6.50806	-6.41704	-6.19606	1.58384	1.6666	1.52348	-3.94421	-4.21902	-6.44582
	0.938805	-1.51228	Q4MNX8	3734	RNA polymerase sigma factor SigA GN=sigA	11	11	11	36.8	36.8	36.8	43.241	0	58.34	203800000	31	20260000	70041000	34211000	0	0	395810	16737000	28757000	33401000	0	0	0	11	11	11	-3.08481	-2.70627	-2.67893	-6.15765	-6.76762	-6.773	-3.36494	-2.83482	-2.96727	-6.23581	-3.73511	-5.19051
	0.661515	-1.52529	Q4MS06	aspS	Aspartate--tRNA(Asn) ligase GN=aspS	14	14	14	28.9	28.9	28.9	66.321	0	170.2	472410000	70	46416000	111150000	82886000	0	294290	0	56832000	118460000	53397000	644330	2325100	0	14	14	14	-1.51947	-1.92035	-1.17589	-6.32859	-5.94064	-5.25654	-1.24896	-1.29348	-2.06422	-5.95758	-4.47554	-2.51678
	0.466735	-1.52658	A0A0B5YVF8	dnaN	DNA polymerase III subunit beta GN=dnaN	22	22	22	66.5	66.5	66.5	42.576	0	265.64	1467500000	109	62764000	258450000	133690000	0	0	0	239990000	354280000	418340000	0	0	0	22	22	22	-0.718823	-0.436436	-0.365327	-6.31296	-6.72975	-6.12437	0.72107	0.155388	0.412603	-7.50155	-4.37238	-2.71341
	0.519868	-1.52948	Q4MSS2	hup	DNA-binding protein HU GN=hup	6	6	6	67.8	67.8	67.8	9.6759	0	31.172	265120000	22	11452000	65997000	34359000	527690	0	1212500	18237000	86511000	45481000	1338600	0	0	6	6	6	-2.98352	-2.50237	-2.14625	-5.39819	-7.45901	-6.57348	-2.62317	-2.11243	-2.49328	-7.13819	-4.43575	-3.26831
	0.467589	-1.53455	A0A0B5Z6K9	52	Bacillolysin GN=AQ16_52	9	7	7	13.4	10.9	10.9	97.574	0	20.413	46162000	12	6549100	20831000	12769000	1473400	0	819200	2299300	1421000	0	0	0	0	7	7	9	-4.00635	-4.12657	-3.78399	-6.48383	-5.70031	-5.96882	-4.38322	-5.76824	-4.57644	-7.27827	-2.72055	-3.5505
	0.397618	-1.53662	A0A0B5YRP4	565	Short chain dehydrogenase family protein GN=AQ16_565	16	16	16	85.4	85.4	85.4	25.164	0	118.26	524630000	57	34693000	77771000	24731000	0	270360	0	69387000	127000000	190650000	126630	0	0	16	16	16	-1.82018	-2.45619	-2.50104	-7.14202	-6.74466	-5.60838	-1.36501	-1.21358	-0.901542	-8.06429	-3.01234	-3.80857
	4.35091	-1.53919	Q4ML88	5100	Sulfatase family protein GN=AQ16_5100	25	25	25	51.6	51.6	51.6	74.697	0	323.31	2191300000	300	23364000	115450000	42199000	131730000	136370000	71299000	98856000	204730000	190300000	836120000	87168000	253750000	25	25	25	-1.89594	-1.6697	-1.25654	0.95692	0.769211	0.85796	-0.51999	-0.882845	-0.680562	2.4731	2.44666	2.28191
	0.655364	-1.54188	A0A0B5Z9Z8	5568	Protective antigen GN=pagA	12	12	11	27.4	27.4	25.7	85.822	0	38.612	208310000	35	27876000	68089000	15548000	0	1153200	0	42580000	40134000	12924000	0	0	0	11	12	12	-2.631	-2.91097	-3.28295	-6.3192	-7.37974	-5.6486	-1.61282	-2.86417	-3.97967	-6.769	-4.1744	-3.77849
	0.758593	-1.54581	Q4MTP2	3995	Phosphoenolpyruvate-protein phosphotransferase GN=ptsI	38	38	38	70.2	70.2	70.2	62.78	0	297.6	4592200000	361	339730000	768090000	476490000	0	657650	1711500	742520000	1569600000	672570000	19107000	1773200	0	38	38	38	1.3191	0.450358	1.50969	-4.18161	-7.22255	-4.85794	1.7455	2.27437	1.14828	-3.69786	-4.21059	-3.71621
	1.56492	-1.5511	Q4MLG5	2544	Ribosome-binding ATPase YchF GN=ychF	14	14	14	45.4	45.4	45.4	40.697	0	143.17	403970000	53	47181000	182630000	86397000	0	0	0	12701000	20279000	51135000	3643900	0	0	14	14	14	-1.59999	-1.30043	-1.05343	-5.68587	-5.6278	-4.89997	-2.76742	-3.19301	-2.61823	-4.50461	-3.19036	-3.86536
	2.42246	-1.55755	Q4MGD5	2377	30S ribosomal protein S5 GN=rpsE	15	15	15	63.3	63.3	63.3	17.529	0	235.33	5120100000	167	662560000	1412900000	625000000	970660	1865200	692440	460190000	1036900000	904110000	14732000	0	164000	15	15	15	2.21983	1.80591	2.43094	-5.0788	-5.72462	-4.87308	0.826004	1.61488	0.782885	-3.65428	-3.71589	-3.63366
	1.78298	-1.56065	Q4MSR0	993	Uncharacterized protein GN=AQ16_993	20	20	20	50.8	50.8	50.8	42.164	0	170.43	738000000	73	34649000	85409000	48677000	176720	778330	476130	113680000	185340000	261370000	7123600	325240	0	20	20	20	-1.96625	-1.72546	-2.06524	-6.32293	-5.04794	-5.87882	-0.331427	-1.38068	-0.116571	-3.98419	-4.40245	-4.18111
	1.06846	-1.56355	A0A0B5Z977	2713	ATP synthase gamma chain GN=atpG	14	14	14	61.9	61.9	61.9	31.606	0	200.67	1128200000	139	60193000	157430000	78405000	81171000	67876000	36952000	23844000	89867000	77461000	217220000	40611000	197220000	14	14	14	-1.67922	-1.5496	-1.36812	0.426882	-0.395045	0.257129	-2.12206	-1.94615	-1.83584	0.432136	1.95692	2.59057
	1.14126	-1.56446	A0A0B5YX80	2172	DNA ligase GN=ligA	13	13	13	28.3	28.3	28.3	75.155	0	35.142	256960000	35	24816000	60544000	13224000	0	0	0	33220000	118760000	6394000	0	0	0	13	13	13	-2.67696	-2.80758	-3.09597	-6.02455	-6.10435	-5.52617	-1.90907	-1.3769	-4.04506	-5.3308	-3.19642	-4.43447
	2.01227	-1.56607	Q4MIB5	2712	ATP synthase subunit beta GN=atpD	33	33	33	73.3	73.3	73.3	51.021	0	323.31	7266700000	957	339260000	1066800000	707540000	530680000	542070000	229800000	362290000	600190000	661480000	1219800000	379020000	627740000	33	33	33	1.33976	1.58386	1.41143	1.84025	2.42728	1.80473	0.863266	0.902585	1.29153	3.05172	3.81673	3.90204
	1.20902	-1.56842	Q4MWQ9	1680	Efflux transporter, RND family, MFP subunit GN=AQ16_1680	14	14	14	39.8	39.8	39.8	39.782	0	66.132	265800000	41	8837800	33381000	6998000	0	294990	204810	60062000	62106000	93911000	0	0	0	14	14	14	-3.44754	-2.99181	-2.997	-6.66744	-6.64405	-5.36279	-1.82034	-2.42073	-1.74352	-5.23358	-4.92238	-3.81305
	0.468326	-1.56945	Q4MLF8	2537	Ribosomal RNA small subunit methyltransferase G GN=rsmG	7	7	7	28.5	28.5	28.5	27.195	0	55.107	236030000	21	24203000	40913000	32173000	0	0	0	26482000	59016000	53240000	0	0	0	7	7	7	-2.77055	-3.18447	-2.69476	-6.71601	-6.07389	-4.05955	-2.73777	-2.61432	-2.49612	-6.15329	-1.9622	-4.02563
	2.14002	-1.57049	Q4MMT4	3955	Purine nucleoside phosphorylase GN=AQ16_3955	8	8	8	41.4	41.4	41.4	29.534	0	246.14	1868700000	289	61661000	171580000	75178000	129730000	131130000	62327000	129580000	187530000	235930000	399790000	121670000	162620000	8	8	8	-1.70876	-1.61998	-1.62064	-0.0420953	0.316885	-0.17643	-0.748194	-1.09602	-1.03575	1.07148	1.98443	1.75391
	0.596566	-1.57135	Q4MJM0	3695	CRS1 / YhbY domain protein GN=AQ16_3695	5	5	5	62.9	62.9	62.9	11.062	0	15.378	115410000	14	6005000	54646000	3275800	0	0	0	1280000	30605000	18202000	0	0	1392900	5	5	5	-3.92469	-3.261	-3.83216	-6.23933	-5.94679	-6.04395	-4.97416	-3.6482	-6.54138	-6.85357	-3.24984	-3.4126
	2.93251	-1.58907	Q4MSR6	987	GTPase Der GN=engA	13	13	13	35.3	35.3	35.3	48.618	0	35.788	351690000	35	41167000	127790000	53094000	0	0	0	21043000	50582000	55697000	2312900	0	0	13	13	13	-2.17943	-2.11284	-1.47461	-6.40386	-6.32852	-5.92622	-2.14917	-3.21023	-2.01586	-4.77168	-4.38683	-4.73287
	0.48698	-1.60443	Q4MJK6	3709	Elongation factor 4 GN=lepA	11	11	11	27.3	27.3	27.3	67.933	0	34.783	97822000	22	16616000	34073000	19339000	0	1136600	0	3861400	22796000	0	0	0	0	11	11	11	-3.36987	-3.94692	-3.04103	-8.00086	-5.23086	-5.93298	-6.04921	-3.24456	-6.14888	-7.12011	-3.57604	-3.65528
	0.648566	-1.60867	Q4MIY9	2148	Thermophilic metalloprotease family protein GN=AQ16_2148	11	11	11	29.8	29.8	29.8	45.32	0	113.13	240950000	47	2708400	16539000	7278900	19888000	37957000	1023700	11137000	15554000	30607000	66556000	12630000	19072000	11	11	11	-4.31157	-3.79343	-3.76791	-1.72319	-0.863826	-4.3854	-2.90448	-3.61522	-3.41615	-1.06397	0.0135912	-1.09602
	0.625757	-1.61609	A0A0B5ZE15	4144	Cell division protein FtsZ GN=ftsZ	13	13	13	50.5	50.5	50.5	40.731	0	153.84	761300000	80	59909000	158750000	112520000	0	0	0	106610000	110930000	212580000	0	0	0	13	13	13	-1.25906	-1.34368	-0.810844	-6.03645	-7.7411	-5.18723	-0.618505	-1.35865	-0.585483	-6.37754	-3.35603	-4.38291
	2.53012	-1.62951	Q4MVV5	ald	Alanine dehydrogenase GN=ald	31	15	15	97.3	57.3	57.3	40.108	0	323.31	2519300000	355	83393000	155420000	94979000	198540000	166010000	59717000	89151000	116990000	184820000	875730000	144660000	349860000	15	15	31	-0.726939	-1.08872	-0.80906	0.738346	1.0864	0.576555	-0.831172	-1.30787	-0.787795	2.74627	2.0533	2.49026
	0.686872	-1.65308	Q4MH07	4203	Signal recognition particle receptor FtsY GN=ftsY	7	7	7	25.2	25.2	25.2	36.508	0	11.897	114320000	17	9211500	31707000	20018000	0	773360	0	19334000	10974000	22305000	0	0	0	7	7	7	-3.64121	-3.80658	-3.35077	-5.95679	-4.77838	-5.51677	-2.88743	-3.94765	-3.52955	-5.84204	-2.79423	-2.65644
	0.996385	-1.65409	Q4MMU9	3941	Calcineurin-like phosphoesterase family protein GN=AQ16_3941	10	5	5	26.1	14.2	14.2	57.956	0	24.54	113270000	16	5443900	0	10044000	0	1105200	178540	8227800	23653000	7960000	18273000	0	38383000	5	5	10	-4.47651	-4.39292	-3.97151	-6.49487	-5.35635	-4.72579	-4.24493	-4.36314	-4.3552	-2.80784	-4.81096	-3.99594
	0.681213	-1.66484	A0A0B5ZJ65	2406	50S ribosomal protein L1 GN=rplA	24	24	24	79.1	79.1	79.1	24.481	0	323.31	8225500000	250	1008000000	2054300000	1102500000	1655200	5172400	729020	875110000	1365500000	1801000000	4549200	2128400	4863800	24	24	24	2.95226	2.50274	2.66922	-6.47269	-5.81858	-6.54767	2.41017	2.31026	2.7776	-6.46757	-4.67187	-2.70498
	0.512214	-1.6818	Q4MI23	2469	Transcription-repair-coupling factor GN=mfd	5	5	5	5.5	5.5	5.5	134.19	0	9.9633	16414000	6	2835200	10326000	2593900	0	0	0	0	659850	0	0	0	0	5	5	5	-5.67352	-5.49853	-5.64453	-7.9058	-6.03052	-4.91809	-4.79842	-5.9009	-5.49635	-6.54627	-4.68073	-2.582
	0.437658	-1.69621	Q4MIM4	3884	Dihydrolipoamide acetyltransferase component of pyruvate dehydrogenase complex GN=AQ16_3884	8	8	8	25.5	25.5	25.5	47.367	0	42.645	302560000	32	27145000	81876000	59937000	4158900	3359200	844840	23345000	40142000	45832000	15917000	0	0	8	8	8	-2.37135	-2.43092	-1.81452	-5.10635	-8.66613	-3.13286	-2.24097	-2.23646	-2.87082	-3.19199	-4.31317	-4.31155
	0.957547	-1.70131	Q4MTQ7	3981	Peptidyl-prolyl cis-trans isomerase GN=ppiB	7	7	7	77.2	77.2	77.2	15.774	0	18.676	461070000	28	40236000	125700000	67450000	0	1845100	626410	42651000	102750000	79814000	0	0	0	7	7	7	-1.68894	-1.70959	-1.55529	-5.76609	-6.68136	-5.06979	-2.12935	-1.49216	-1.5099	-5.34892	-2.96462	-4.09978
	0.617627	-1.70159	Q4MH85	2453	33 kDa chaperonin GN=hslO	9	9	9	37.5	37.5	37.5	32.058	0	215.28	299130000	32	15447000	39438000	11288000	913920	445440	0	37876000	105660000	88056000	0	0	0	9	9	9	-2.59147	-2.77717	-3.28556	-5.84751	-7.09161	-6.83305	-1.69596	-1.73899	-1.76134	-7.21312	-3.38883	-4.06546
	0.715693	-1.70513	Q4MQW9	1976	Probable transcriptional regulatory protein AQ16_1976 GN=AQ16_1976	5	5	5	39.3	39.3	39.3	26.347	0	38.777	403380000	33	44410000	63246000	31638000	0	0	0	48201000	96641000	115850000	3394100	0	0	5	5	5	-1.77375	-2.59976	-2.00196	-5.58221	-5.78218	-5.61852	-1.65893	-1.59893	-1.40669	-5.85913	-2.09355	-3.91484
	0.853453	-1.71709	Q4MRF7	512	DNA protection during starvation protein 1 GN=dps1	8	8	8	61.2	61.2	61.2	16.65	0	73.81	260690000	82	0	194600	0	7672800	9836800	5132200	3507700	0	4849800	149630000	53899000	25972000	8	8	8	-5.43597	-6.35632	-6.46913	-2.37312	-2.82401	-1.66941	-5.16745	-4.85107	-6.4298	0.360329	0.239616	-2.31523
	1.05788	-1.74037	Q4MLQ4	5047	M6 family metalloprotease domain protein GN=AQ16_5047	18	15	15	28.8	26.7	26.7	87.205	0	65.866	308720000	64	2697200	5310100	5961100	9623200	25536000	10676000	4047000	7994600	0	180920000	18316000	37638000	15	15	18	-5.41154	-3.53775	-5.68019	-3.02134	-1.59501	-1.75543	-5.07932	-5.46955	-4.77962	0.819796	-0.67479	-1.29569
	1.3265	-1.75872	Q4MRB5;Q4MV42;Q4MKX0	galU	UTP--glucose-1-phosphate uridylyltransferase GN=galU	16	16	16	60	60	60	33.557	0	60.458	632700000	63	60762000	195020000	66262000	0	0	0	53421000	112930000	143130000	1175400	0	0	NaN	NaN	NaN	-1.89671	-1.27376	-1.13236	-6.27514	-5.75113	-5.4459	-1.57127	-1.85276	-0.976684	-4.82126	-2.94518	-4.42959
	0.975695	-1.78513	Q4MXE9	4829	Pyridoxal phosphate-dependent enzyme, D-cysteine desulfhydrase family protein GN=AQ16_4829	9	9	9	31.7	31.7	31.7	35.433	0	22.574	145830000	27	13781000	48915000	13775000	1253900	1576000	1076300	3127100	1862000	32891000	20164000	4331800	3080300	9	9	9	-3.4705	-3.18379	-3.2284	-5.84358	-5.50614	-3.24619	-5.11676	-5.67923	-3.24556	-2.70514	-2.94383	-3.59155
	1.78953	-1.78877	Q4MIN0	3878	Phosphate butyryltransferase GN=ptb	23	23	23	84.3	84.3	84.3	31.526	0	323.31	5628000000	311	142710000	294850000	164880000	1126100000	1412100000	225640000	159730000	256950000	292580000	1017400000	188360000	346720000	23	23	23	1.46068	0.942615	1.34992	2.87579	2.28433	2.45651	1.43947	1.12634	1.3319	3.63205	5.05867	4.29221
	0.485308	-1.79076	Q4MSX5	931	THUMP domain protein GN=AQ16_931	16	16	16	52	52	52	43.107	0	171.51	402060000	46	45231000	196620000	83899000	0	0	0	15276000	9344500	51681000	0	0	0	16	16	16	-1.45985	-1.00351	-1.2486	-7.04036	-6.59876	-5.34508	-3.00658	-5.89701	-2.30402	-7.56531	-2.73938	-3.30722
	0.495916	-1.80749	Q4MSH9	1135	Ribonucleoside-diphosphate reductase subunit beta GN=AQ16_1135	10	10	10	35.1	35.1	35.1	36.977	0	49.967	288020000	36	12439000	80001000	21974000	596970	4161800	674230	48795000	44712000	62993000	11670000	0	0	10	10	10	-3.44828	-2.66174	-2.678	-7.74353	-3.65943	-2.96043	-1.98066	-2.79922	-2.31123	-2.77398	-2.14443	-4.0225
	2.29932	-1.81603	A0A0B5Z1C4	1798	Quinol oxidase subunit 2 GN=qoxA	8	8	8	40.9	40.9	40.9	33.336	0	42.926	304660000	29	27712000	68091000	24764000	1493400	1675600	0	17573000	79660000	68737000	8608300	1291700	5048800	8	8	8	-2.05535	-2.58065	-3.02912	-5.32343	-5.9809	-5.76733	-2.48693	-2.12743	-2.20027	-3.48537	-3.76846	-4.36975
	0.554833	-1.82517	A0A0B5Z524	2510	Sigma-70, region 4 family protein GN=AQ16_2510	3	3	3	28.5	28.5	28.5	14.329	0	6.0299	49937000	5	5215600	2573400	7173000	298580	0	0	5832800	19520000	9323900	0	0	0	3	3	3	-4.62091	-6.45794	-4.24268	-5.13805	-8.25059	-4.9413	-4.68282	-4.3376	-4.25061	-6.18795	-3.79235	-2.87411
	0.7295	-1.83667	Q4MVP6	3318	Catabolite control protein A GN=ccpA	13	13	13	44.3	44.3	44.3	36.91	0	70.004	405800000	65	37362000	70325000	44807000	778210	453950	0	32818000	75698000	123600000	18567000	1386300	0	13	13	13	-2.05962	-2.62774	-1.60006	-5.49972	-6.38607	-5.68873	-2.12898	-2.81112	-1.62654	-6.26371	-2.88034	-2.92047
	2.12655	-1.84277	Q4MRD7	3079	Glucose-6-phosphate isomerase GN=pgi	28	28	28	80	80	80	50.344	0	323.31	9663500000	463	382580000	1393800000	829750000	269720000	164900000	96440000	972270000	1995300000	2146900000	954280000	120140000	337470000	28	28	28	1.24233	1.54258	1.32216	1.38298	1.11765	1.34031	1.82771	2.28076	2.4475	2.50758	3.11069	3.75099
	0.59375	-1.85111	Q4MGH4	5823	Uncharacterized protein GN=AQ16_5823	8	8	8	40.3	40.3	40.3	23.991	0	28.567	77838000	20	0	0	1196600	0	0	0	36433000	28544000	10740000	924930	0	0	8	8	8	-5.74004	-6.5897	-5.842	-6.79256	-7.07439	-5.33505	-2.21125	-3.48994	-3.77446	-6.92165	-4.22117	-2.50584
	1.78063	-1.86214	A0A0B5Z4F9	upp	Uracil phosphoribosyltransferase GN=upp	10	10	10	70.3	70.3	70.3	22.9	0	41.566	832830000	68	66481000	174310000	80480000	0	0	0	65947000	229980000	213690000	1938000	0	0	10	10	10	-0.9717	-0.878886	-1.60897	-6.41874	-5.17791	-5.65527	-1.18811	-0.305082	-0.831187	-4.44927	-3.79043	-3.4258
	0.653072	-1.86417	A0A0B5ZEF5	2381	30S ribosomal protein S14 type Z GN=rpsN1	2	2	2	21.3	21.3	21.3	7.2957	0	4.5066	53543000	10	4329000	20069000	9564000	0	0	0	0	7610700	11970000	0	0	0	2	2	2	-4.79385	-4.24286	-4.25406	-5.88969	-8.73522	-5.78866	-4.31534	-4.93145	-4.41846	-6.56224	-4.60932	-3.6495
	1.88274	-1.8709	Q4MSB1	1200	Bacterial extracellular solute-binding family protein GN=AQ16_1200	9	9	9	29.8	29.8	29.8	39.883	0	22.889	191520000	35	12365000	35508000	16259000	0	1275600	0	35517000	27172000	62044000	1375000	0	0	9	9	9	-4.04985	-3.79002	-3.64413	-6.18532	-6.59593	-5.83694	-2.8443	-3.40506	-2.61922	-5.00672	-3.68754	-4.31122
	0.463714	-1.87761	Q4MHW1	4535	VanW like family protein GN=AQ16_4535	8	8	8	34.3	34.3	34.3	32.323	0	53.043	295700000	33	18310000	40840000	18799000	5375100	0	0	65091000	78997000	66885000	883670	0	516420	8	8	8	-2.64399	-3.24416	-2.52935	-5.68324	-8.70562	-5.21501	-1.50922	-1.71973	-2.03452	-7.26395	-2.64415	-4.06295
	0.409562	-1.89412	Q4ML28	1815	3D domain protein GN=AQ16_1815	39	39	39	78.2	78.2	78.2	46.284	0	323.31	13766000000	505	1314800000	5420000000	2728800000	5470900	439310	590480	1034200000	1680900000	1575100000	630360	1412600	4003900	39	39	39	3.09607	3.53836	3.80843	-5.80686	-6.94642	-5.14153	3.32923	2.26829	2.49236	-7.26485	-4.2307	-0.716904
	1.37498	-1.89744	Q4MGD9	2373	Adenylate kinase GN=adk	17	17	17	69	69	69	23.743	0	103.83	1547700000	134	81545000	261410000	86151000	0	0	0	238830000	364620000	510700000	4403200	0	0	17	17	17	-0.765425	-0.762468	-0.547757	-6.11027	-5.57241	-6.15764	0.419716	0.236601	0.538121	-4.30315	-2.87782	-4.96704
	0.519569	-1.90493	Q4MJA7	3821	Uncharacterized protein GN=AQ16_3821	4	4	4	16.8	16.8	16.8	30.698	0	18.917	32258000	8	2114000	5321100	2793300	0	0	0	7981900	6553000	7495300	0	0	0	4	4	4	-5.02155	-5.19924	-5.63622	-6.17676	-6.64903	-4.9602	-4.54969	-5.45039	-5.35124	-7.00251	-1.93118	-3.13753
	0.628603	-1.91027	Q4MGR8	658	Hemolytic enterotoxin family protein GN=AQ16_658	20	20	20	69.6	69.6	69.6	39.943	0	256.38	1342700000	89	241610000	794340000	269930000	805980	302650	419380	22466000	5900800	2909200	2319400	946800	756460	20	20	20	1.28322	0.874541	0.191918	-7.94913	-5.9537	-4.77619	-4.04229	-6.00542	-5.27255	-6.20464	-2.76442	-3.97914
	1.53959	-1.91167	Q4MM92	1306	Bacterial extracellular solute-binding s, 5 Middle family protein GN=AQ16_1306	51	51	46	66.1	66.1	63.3	61.712	0	323.31	9979900000	939	1932900	9151600	4652700	654140000	834360000	345590000	2002800	5823300	6054500	5131600000	607250000	2377300000	46	51	51	-8.94548	-8.76648	-7.36253	3.68418	4.0623	2.40367	-8.46986	-8.47563	-8.19211	5.83819	4.94221	5.10477
	2.62249	-1.92035	A0A0B5ZIA2	4222	GTP-sensing transcriptional pleiotropic repressor CodY GN=codY	16	16	16	63.3	63.3	63.3	28.793	0	323.31	3453100000	132	284470000	671510000	391920000	3825400	0	638650	417860000	789040000	886180000	7652800	0	0	16	16	16	1.40559	0.957946	0.93449	-4.91047	-5.84062	-5.42916	1.30944	1.522	1.75168	-3.51678	-3.3189	-3.58351
	1.95887	-1.92158	A0A0B5Z8U7	3715	Chaperone protein DnaJ GN=dnaJ	5	5	5	18.9	18.9	18.9	40.319	0	15.279	145460000	17	7125100	44867000	13167000	0	0	0	20235000	26407000	30224000	3436200	0	0	5	5	5	-3.92491	-3.27353	-3.35443	-7.00176	-5.53094	-6.17306	-3.30693	-3.86087	-3.4008	-4.3342	-4.21404	-4.39277
	1.20231	-1.94038	A0A0B5Z8V4	2387	50S ribosomal protein L16 GN=rplP	7	7	7	53.5	53.5	53.5	16.172	0	22.395	776670000	41	108090000	251110000	72155000	1636100	0	1772500	43797000	182750000	111790000	2423200	1150200	0	7	7	7	-0.730172	-0.436866	-1.17586	-6.46912	-5.07583	-6.20165	-1.45587	-1.18455	-0.92043	-3.94014	-2.90712	-5.07819
	0.932774	-1.97179	A0A0B5ZH14	repX	Plasmid replication protein repX GN=repX	10	10	10	32.4	32.4	32.4	48.734	0	25.501	248280000	34	4452300	38523000	17159000	0	0	0	27661000	60556000	99261000	0	664690	0	10	10	10	-3.78741	-3.14154	-3.11919	-7.43561	-7.42845	-5.88077	-2.31336	-2.57407	-1.66355	-6.54963	-4.5781	-3.70173
	2.23746	-1.9789	Q4MHJ1	369	Fungalysin metallopeptidase family protein GN=AQ16_369	23	23	23	61.2	61.2	61.2	54.619	0	321.26	489010000	120	0	0	0	17904000	24265000	10433000	0	0	1655000	254460000	80415000	99878000	23	23	23	-4.48947	-6.86893	-5.77294	-0.77714	-1.54686	-0.692849	-5.57087	-4.70218	-6.21929	0.695942	1.46899	0.754918
	0.37771	-1.97922	A0A0B5Z2K6	pyrH	Uridylate kinase GN=pyrH	10	10	10	60	60	60	25.87	0	213.91	742310000	72	84099000	225400000	78225000	1638900	0	0	81254000	160440000	110510000	733770	0	0	10	10	10	-0.663089	-0.762343	-1.31463	-5.27296	-6.77079	-5.76944	-2.01499	-1.29894	-1.08626	-8.26308	-1.62183	-1.99062
	0.936829	-1.98707	A0A0B5ZG92	4818	LPXTG cell wall anchor domain protein GN=AQ16_4818	22	22	22	48.7	48.7	48.7	42.063	0	157.89	605210000	74	48792000	163030000	80286000	0	0	0	95375000	40375000	173240000	0	0	4112800	22	22	22	-1.60898	-1.17983	-0.864149	-7.35907	-6.96637	-5.60526	-0.850671	-2.08098	-0.674926	-6.27485	-3.47359	-4.22105
	0.725377	-2.00185	Q4MRZ9	3627	tRNA-specific 2-thiouridylase MnmA GN=trmU	4	4	4	19.4	19.4	19.4	41.718	0	8.5612	73515000	9	8466900	35374000	11054000	0	0	0	2644900	0	15976000	0	0	0	4	4	4	-3.58003	-3.66993	-3.5278	-6.07326	-6.82665	-6.78595	-3.29388	-5.9089	-4.30135	-6.57699	-2.30402	-4.79931
	1.63436	-2.00666	A0A0B5YWA6	4223	30S ribosomal protein S2 GN=rpsB	23	23	23	81.1	81.1	81.1	26.563	0	323.31	6073700000	295	778500000	1852100000	584440000	1290600	2856200	839340	500890000	1124800000	1216000000	10943000	1035300	0	23	23	23	2.12042	1.89349	1.45505	-5.14957	-5.39777	-6.27915	1.82518	2.31505	1.99179	-4.37885	-3.58632	-2.84132
	1.2513	-2.01035	Q4MM09	2832	Cell division protein FtsX GN=ftsX	6	6	6	20.5	20.5	20.5	33.167	0	11.743	55439000	17	6680700	14393000	6847200	0	0	0	1602900	12647000	13268000	0	0	0	6	6	6	-4.45803	-5.03693	-5.09295	-6.724	-6.16542	-4.8247	-4.68136	-4.61649	-4.63651	-4.8954	-3.43933	-3.34831
	0.988232	-2.01382	Q4MLG8	2547	30S ribosomal protein S18 GN=rpsR	9	9	9	55.8	55.8	55.8	8.8134	0	24.34	1406700000	59	166350000	523330000	211910000	1045500	906900	0	44690000	233410000	221630000	3448300	0	0	9	9	9	0.289584	0.417546	0.0621829	-7.72749	-5.68232	-5.35642	-0.536846	-0.0753829	-0.308652	-5.40395	-3.38959	-3.93123
	0.811026	-2.03235	Q4MGA1	5832	Putative gp14-like protein GN=AQ16_5832	10	10	10	70.1	70.1	70.1	15.368	0	111.28	331760000	28	0	0	2171900	0	0	0	102740000	158090000	68762000	0	0	0	10	10	10	-6.55541	-6.13259	-4.2566	-6.43539	-6.2004	-5.88539	-0.170513	-1.34635	-2.46144	-6.3757	-3.48583	-2.5626
	0.789489	-2.03514	Q4MX31	4939	L-asparaginase, type I family protein GN=AQ16_4939	8	8	8	29.6	29.6	29.6	37.199	0	123.41	146520000	25	8306500	13795000	1932000	0	0	0	25267000	39136000	58087000	0	0	0	8	8	8	-4.28954	-4.19046	-4.68553	-4.59276	-7.57583	-6.69874	-3.26041	-2.83659	-2.75634	-5.81901	-3.22658	-3.71631
	1.13837	-2.03829	Q4MQG2	2068	Toxic anion resistance family protein GN=AQ16_2068	4	4	4	14.4	14.4	14.4	41.672	0	9.9296	66031000	9	2272800	9680800	3308400	0	0	0	10678000	16600000	18810000	4681300	0	0	4	4	4	-6.26867	-6.94448	-5.12757	-7.66706	-6.2997	-5.13459	-4.27215	-4.24625	-3.98006	-4.63839	-3.50427	-4.84381
	0.898216	-2.04407	Q4MJE9	2126	Periplasmic binding family protein GN=AQ16_2126	5	5	5	21.6	21.6	21.6	34.43	0	12.579	120680000	18	8136700	28040000	15942000	0	850180	0	4004400	19543000	38366000	5802600	0	0	5	5	5	-3.74391	-4.00687	-3.47813	-7.38083	-6.54255	-3.88568	-3.77829	-4.05622	-3.37124	-4.14307	-3.8185	-3.71529
	0.654936	-2.05843	Q4MJI3	2751	Transcriptional regulator LytR GN=lytR	4	4	4	18.5	18.5	18.5	33.859	0	7.7359	23973000	8	4179900	13253000	3824700	0	0	0	1193500	0	1197200	324930	0	0	4	4	4	-4.31978	-5.69164	-5.17816	-5.52969	-8.38005	-6.61538	-5.51326	-5.99807	-4.80924	-7.02919	-4.12396	-3.19667
	1.53968	-2.06553	Q4MVE9	3227	S-adenosylmethionine synthase GN=metK	18	18	18	51.1	51.1	51.1	43.281	0	66.524	1375500000	83	128540000	411330000	227220000	0	1199700	0	125150000	188710000	285570000	7775700	0	0	18	18	18	0.00269932	-0.134373	0.29509	-5.28944	-6.09486	-5.39475	-0.416614	-0.430851	0.324356	-3.07602	-2.85685	-4.64958
	0.822053	-2.06683	Q4MSH8	1136	Ribonucleotide reductase, barrel domain protein GN=AQ16_1136	7	7	7	39.1	39.1	39.1	32.312	0	50.713	185270000	25	14336000	11239000	6436000	0	0	0	23896000	101270000	26084000	2012100	0	0	7	7	7	-3.0917	-3.74653	-4.90766	-6.83713	-5.66717	-5.57845	-2.35604	-2.08499	-3.59301	-6.06417	-2.40115	-3.41693
	1.24596	-2.11927	Q4MS58	3570	Cell shape determining, MreB/Mrl family protein GN=AQ16_3570	14	14	14	49.6	49.6	49.6	36.046	0	97.701	269000000	41	37389000	108070000	54425000	0	0	0	13540000	18499000	34140000	2935800	0	0	14	14	14	-2.01984	-2.22509	-1.75298	-4.523	-7.28244	-5.94988	-3.0379	-3.42818	-3.04231	-3.78138	-3.90117	-3.71495
	1.86697	-2.12538	A0A0B5Z8M8	3296	Peptidase M20/M25/M40 family protein GN=AQ16_3296	17	17	17	69.7	69.7	69.7	39.177	0	167.19	594240000	78	16755000	48848000	10796000	41193000	36433000	8576900	25635000	31888000	109240000	202530000	26986000	35367000	17	17	17	-3.42702	-3.55084	-3.91587	-0.751086	-1.50059	-2.44775	-3.40445	-3.49565	-2.37163	0.561474	0.761535	0.353684
	0.682233	-2.14365	Q4MJ58	4179	Guanylate kinase GN=gmk	7	7	7	40	40	40	23.677	0	20.41	90498000	20	7766200	14447000	4549700	0	0	0	10192000	29276000	24267000	0	0	0	7	7	7	-3.55823	-4.4884	-4.14654	-5.22307	-7.55798	-5.53574	-5.35481	-3.41681	-3.31399	-6.28293	-3.49105	-2.11187
	1.32375	-2.14457	A0A0B5ZKS3	lef	Lethal factor GN=lef	12	12	12	19.7	19.7	19.7	93.404	0	71.175	173530000	36	9516700	11593000	5520000	1009100	772650	431530	49492000	66954000	24332000	3905300	0	0	12	12	12	-3.60744	-4.16036	-3.80322	-5.2557	-6.89073	-4.5576	-2.14064	-2.29536	-3.92956	-4.00484	-3.32747	-2.93799
	0.808995	-2.1548	Q4MS22	3606	Queuine tRNA-ribosyltransferase GN=tgt	10	10	10	36.9	36.9	36.9	43.213	0	57.963	327760000	31	34792000	94158000	40381000	0	0	0	7302400	74084000	77043000	0	0	0	10	10	10	-2.46394	-2.21469	-2.76361	-7.09061	-6.01165	-6.73337	-3.13329	-2.52424	-2.0877	-6.57815	-4.33383	-2.45924
	0.79885	-2.15996	Q4MS07	3619	Histidine--tRNA ligase GN=hisS	12	12	12	36.2	36.2	36.2	47.78	0	54.914	460070000	38	37656000	135850000	59857000	4025900	6665200	2140600	58275000	63973000	88809000	1864400	958760	0	12	12	12	-2.12571	-1.69993	-1.61539	-6.76934	-3.47061	-6.29654	-1.44045	-2.00813	-1.14416	-4.01238	-1.9384	-4.10582
	0.863365	-2.1885	Q4MI67	548	Cell-wall binding lipofamily protein GN=AQ16_548	6	6	6	34.4	34.4	34.4	25.02	0	17.692	65826000	17	6044800	11596000	6798000	0	0	0	3822900	19666000	17899000	0	0	0	6	6	6	-4.6286	-5.0723	-4.91408	-6.5447	-6.91346	-4.97767	-4.66009	-3.70929	-3.62317	-5.74805	-2.22061	-3.90166
	1.337	-2.20988	Q4MPR8	2223	10 kDa chaperonin GN=groS	12	12	12	100	100	100	10.069	0	235.19	1819300000	144	52254000	125570000	54279000	25389000	13958000	2305800	308210000	712790000	280850000	118470000	17244000	107980000	12	12	12	-1.32328	-1.27599	-0.990875	-0.303409	-1.8814	-2.47091	0.392268	1.13576	0.166811	0.112131	0.370244	1.49156
	0.786143	-2.2363	Q4MK53	1019	Pseudouridine synthase GN=rluB	5	5	5	25.6	25.6	25.6	27.556	0	28.864	115140000	22	16641000	24023000	15782000	0	1245600	0	10437000	20411000	24242000	2360300	0	0	5	5	5	-3.37117	-4.12161	-4.13766	-6.45868	-7.69887	-6.27635	-3.80692	-3.8723	-3.81497	-7.02638	-3.59885	-3.09977
	1.61433	-2.2445	Q4MS50	3578	50S ribosomal protein L21 GN=rplU	10	10	10	73.5	73.5	73.5	11.191	0	139.71	3577900000	83	437230000	769000000	553510000	1569800	1301500	928320	360340000	834970000	606600000	10170000	0	2268300	10	10	10	1.66464	1.17838	1.64475	-5.41181	-5.60252	-5.4534	1.44621	1.81064	1.14819	-4.50509	-2.73181	-2.49733
	1.6384	-2.24609	Q4MND6	hpt	Hypoxanthine phosphoribosyltransferase GN=hpt	4	4	4	32	32	32	19.877	0	17.162	90110000	14	9774600	11172000	3488100	0	525550	0	17224000	31290000	16636000	0	0	0	4	4	4	-3.69668	-4.66456	-5.06998	-6.84096	-6.90028	-5.7444	-2.91103	-3.60626	-3.89245	-5.22534	-3.95311	-3.56891
+	2.5066	-2.26132	Q4MVE0	3217	WxL domain surface cell wall-binding family protein GN=AQ16_3217	22	22	22	80.6	80.6	80.6	25.684	0	323.31	8382900000	370	209250000	439200000	276120000	53209000	61450000	19539000	1264400000	2687300000	2415700000	647330000	149520000	159930000	22	22	22	0.898646	0.600734	0.738675	0.0878828	-0.11805	-0.21153	2.95141	3.16049	3.14477	2.42517	2.61515	1.50196
	0.797343	-2.26285	Q4MIR0	5855	Phage antirepressor KilAC domain protein GN=AQ16_5855	4	4	4	22.5	22.5	22.5	29.528	0	12.076	42099000	10	1597400	0	0	0	0	0	10004000	15023000	15474000	0	0	0	4	4	4	-6.1344	-6.26413	-6.6998	-7.62895	-6.29719	-6.11697	-3.99309	-4.0834	-4.01839	-6.85246	-3.02419	-3.37792
	1.10023	-2.27635	Q4MSZ0	917	Rhodanese-like domain protein GN=AQ16_917	2	2	2	10.8	10.8	10.8	31.513	0	5.6598	23953000	4	1414800	0	0	0	0	0	5741800	7216400	6594400	2985400	0	0	2	2	2	-5.44048	-5.83163	-5.13949	-5.97321	-6.66672	-5.12393	-4.72352	-5.15462	-5.21108	-5.36229	-2.61217	-2.96035
	1.22065	-2.28235	Q4MSJ6	dltA	D-alanine--poly(phosphoribitol) ligase subunit 1 GN=dltA	16	16	16	40.9	40.9	40.9	56.536	0	161.75	781230000	97	26237000	128940000	57651000	10102000	18982000	8943000	64783000	190690000	158320000	70580000	22781000	23216000	16	16	16	-3.00387	-2.14014	-3.61467	-3.16945	-2.85047	-1.52389	-2.08604	-1.23431	-1.44312	-1.44898	1.04184	-0.289604
	0.975837	-2.31545	A0A0B5YV23	4205	Signal recognition particle protein GN=ffh	7	7	7	23.2	23.2	23.2	49.516	0	16.289	62911000	13	4708300	23679000	5414200	0	0	0	4689400	12371000	12049000	0	0	0	7	7	7	-4.84839	-4.2562	-4.60281	-5.24045	-7.86154	-6.5161	-4.38853	-4.27023	-4.11239	-5.73734	-2.94484	-3.98957
+	2.89232	-2.32099	Q4MVE1	3218	WxL domain surface cell wall-binding family protein GN=AQ16_3218	28	28	28	81.3	81.3	81.3	25.751	0	323.31	14058000000	596	495770000	1152500000	519260000	76279000	95490000	27493000	2311500000	3986600000	3852300000	953400000	234290000	352790000	28	28	28	1.91867	1.64511	1.44495	0.834099	0.662167	0.134086	3.69326	3.7146	3.8038	3.00524	3.11071	2.47738
	1.31921	-2.32892	A0A0B5YY82	4194	DAK2 domain fusion YloV family protein GN=AQ16_4194	12	12	12	29	29	29	60.559	0	134.38	411950000	53	59008000	122150000	70841000	759570	0	0	60480000	83935000	14219000	561970	0	0	12	12	12	-1.45725	-1.76741	-1.45944	-6.93026	-6.49141	-6.06187	-1.71069	-1.9296	-2.84566	-5.74072	-3.40005	-3.35601
	1.65502	-2.34373	A0A0B5Z7R1	4954	Uncharacterized protein GN=AQ16_4954	15	15	15	37.4	37.4	37.4	67.354	0	51.46	373380000	56	29160000	63694000	16834000	0	0	0	74427000	144090000	41954000	3217200	0	0	15	15	15	-2.46136	-2.66449	-3.06871	-6.88209	-7.11743	-5.14529	-1.82373	-1.0338	-2.49352	-4.24869	-3.69572	-4.16919
	0.741259	-2.34402	Q4MIH8	2777	3D domain protein GN=AQ16_2777	31	31	27	84.5	84.5	84.5	30.685	0	323.31	31331000000	835	3560500000	8299900000	3826100000	1434300	387330	990920	3146200000	6678000000	5801000000	3381400	1085800	12320000	27	31	31	4.66502	4.13662	3.74224	-6.80064	-6.35421	-6.31906	3.69242	4.54762	4.48965	-6.98538	-2.28061	-3.17586
	1.66311	-2.3599	A0A0B5ZGC2	1209	SipW-cognate class signal peptide domain protein GN=AQ16_1209	18	18	18	62.9	62.9	62.9	21.675	0	323.31	2850000000	261	5744900	17450000	8006300	152930000	184080000	130340000	0	1514200	0	1846400000	307640000	195870000	18	18	18	-3.78223	-3.99292	-4.17172	0.775691	1.32295	1.17618	-5.66605	-4.86388	-5.06865	3.94521	4.19927	2.21005
+	2.18715	-2.38198	Q4MLF7	2536	tRNA uridine 5-carboxymethylaminomethyl modification enzyme MnmG GN=gidA	16	16	16	35.9	35.9	35.9	70.294	0	69.251	263520000	43	30558000	56914000	32127000	0	0	0	31412000	88910000	21842000	0	0	1755800	16	16	16	-2.30783	-3.04356	-2.11599	-6.75136	-6.00694	-5.65369	-2.0404	-2.24088	-3.54472	-4.33434	-3.71718	-3.21453
+	3.18755	-2.39592	A0A0B5ZBN7	1827	M6 family metalloprotease domain protein GN=AQ16_1827	43	43	38	55.6	55.6	53.1	88.007	0	323.31	3824100000	593	83207000	215890000	141330000	170600000	223760000	78632000	32222000	56192000	22702000	1938400000	321650000	539490000	38	43	43	-0.143646	-0.821932	-0.317046	1.52992	1.50133	1.29628	-2.58732	-1.86162	-3.58335	3.95214	4.18112	3.38204
	1.90266	-2.40869	A0A0B5ZG72	1825	Zinc-binding dehydrogenase family protein GN=AQ16_1825	16	16	16	50	50	50	37.82	0	185.78	667770000	89	10974000	23187000	6671300	30809000	29205000	14349000	1760100	12943000	5834200	270720000	47035000	214290000	16	16	16	-4.37486	-4.19265	-4.77999	-0.244705	-1.42564	-0.269883	-4.51399	-4.84435	-4.76275	1.31682	1.40855	2.56046
	0.893457	-2.42103	Q4MIR5	5849	Uncharacterized protein GN=AQ16_5849	8	8	8	46.5	46.5	46.5	22.429	0	155.52	874280000	91	45748000	88325000	76761000	540720	3191100	2043400	115490000	234230000	238410000	41757000	19328000	8458800	8	8	8	-1.61816	-1.99535	-2.18526	-4.77673	-3.81297	-3.07387	-0.647912	-0.373009	-0.174372	-1.38136	0.50375	-3.52288
	1.75314	-2.44764	Q4MIF0	2680	Probable DNA-directed RNA polymerase subunit delta GN=rpoE	2	2	2	18.2	18.2	18.2	20.737	0	14.499	156620000	13	14024000	40449000	20859000	0	2216700	691620	30281000	21916000	20574000	5614400	0	0	2	2	2	-3.40764	-3.31705	-3.76998	-6.80159	-7.07255	-5.13996	-3.26693	-4.83243	-5.52785	-4.15707	-3.95208	-3.56203
	1.611	-2.46261	Q4MX05	lepB	Signal peptidase I GN=lepB	2	2	2	13.1	13.1	13.1	20.592	0.0036188	3.8511	54759000	7	2332500	8624400	1701400	386560	0	0	8622200	17891000	15200000	0	0	0	2	2	2	-6.29373	-4.5803	-5.35984	-6.65702	-7.18879	-6.57156	-4.64369	-4.45212	-4.51163	-5.58578	-4.16906	-3.27469
	1.02495	-2.47365	A0A0B5ZJ74	2389	50S ribosomal protein L22 GN=rplV	11	11	11	70.8	70.8	70.8	12.509	0	251.47	3567800000	151	393670000	1201500000	413290000	825800	1176600	0	286490000	692280000	572370000	6199600	0	0	11	11	11	1.62831	1.72018	1.15349	-5.32358	-8.37505	-5.13502	0.466615	1.23233	1.15676	-3.81435	-3.06154	-4.53681
	1.02401	-2.48045	Q4MWS4	1694	Cell envelope-related function transcriptional attenuator common domain protein GN=AQ16_1694	15	15	15	38.8	38.8	38.8	44.578	0	51.185	680030000	48	67502000	266580000	127740000	547890	512140	0	42447000	74370000	94645000	5342500	342430	0	15	15	15	-1.12419	-0.723359	-0.584627	-6.3107	-8.0615	-6.58868	-1.21378	-1.86865	-1.26649	-6.04342	-2.63222	-4.84389
	1.77981	-2.49288	Q4MKJ1	5259	Chitin binding domain protein GN=AQ16_5259	18	18	18	46.6	46.6	46.6	49.782	0	309.21	856830000	148	50652000	212090000	108570000	12560000	6993700	2134800	43919000	56661000	56292000	226620000	45863000	34481000	18	18	18	-1.53143	-0.892157	-0.957391	-1.67576	-2.68098	-2.85458	-1.88729	-2.13172	-1.80404	0.884878	0.244133	-0.861677
	0.78864	-2.51662	Q4MHL9	ilvA	L-threonine dehydratase catabolic TdcB GN=ilvA	7	7	7	27.6	27.6	27.6	35.656	0	22.476	99188000	20	12758000	48518000	17058000	0	553130	0	3605800	4416500	12280000	0	0	0	7	7	7	-3.99139	-3.37108	-3.09817	-6.3184	-8.69889	-5.00801	-4.61386	-5.70197	-3.16478	-6.03005	-2.60662	-3.83877
	1.50435	-2.5381	A0A0B5ZCW4	528	NH(3)-dependent NAD(+) synthetase GN=nadE	7	7	7	41.2	41.2	41.2	29.986	0	101.52	335600000	35	18825000	63716000	15238000	1288400	1098100	298370	34220000	81343000	100670000	18910000	0	0	7	7	7	-2.54565	-2.95369	-2.67507	-5.23572	-7.18005	-5.00528	-2.37397	-2.01997	-2.02211	-2.64839	-3.91249	-3.24588
	1.45082	-2.57387	Q4MVU1	3361	Acetate kinase GN=ackA	25	25	25	88.7	88.7	88.7	43.216	0	241	2604800000	201	339370000	1171600000	484760000	0	489270	549030	104210000	202640000	281480000	18381000	0	1296300	25	25	25	0.989945	1.26395	0.916364	-6.53255	-6.78583	-6.05896	-0.542326	-0.717985	-0.191635	-2.84048	-3.36716	-5.44811
+	2.21948	-2.5939	A0A0B5YYA5	4210	50S ribosomal protein L19 GN=rplS	18	18	18	77.2	77.2	77.2	13.166	0	55.591	4409600000	126	603190000	1414700000	591510000	1004500	2066700	0	350620000	890430000	542860000	13235000	0	0	18	18	18	2.16562	2.09394	1.22103	-5.47506	-6.1395	-6.96172	0.772008	1.86249	1.29742	-3.2901	-3.45358	-4.05088
	1.02272	-2.60369	Q4MU26	239	2-(Hydroxymethyl)glutarate dehydrogenase GN=hgd	12	12	12	48.3	48.3	48.3	32.292	0	49.544	82370000	23	0	3518600	0	3635900	4856100	788800	0	0	0	53403000	7802600	8365000	12	12	12	-6.39695	-6.54652	-5.72528	-2.94625	-3.52353	-6.2992	-5.06609	-5.6308	-5.93496	-1.02593	-1.08426	-2.84772
	1.17843	-2.61621	Q4MGD6	2386	50S ribosomal protein L30 GN=rpmD	4	4	4	48.3	48.3	48.3	6.5557	0	12.283	107020000	13	5952600	26004000	16938000	280650	0	275320	8900500	22326000	26345000	0	0	0	4	4	4	-4.13893	-3.42437	-3.08388	-5.73169	-7.07231	-5.83503	-4.70733	-3.74924	-3.64685	-5.46207	-2.34381	-2.98453
	0.842102	-2.62167	A0A0B5YYQ8	2938	Neutral protease B GN=nprB	24	24	24	41.5	41.5	41.5	60.36	0	323.31	2304800000	264	1234600	11540000	818670	47094000	62572000	36616000	2095100	9264200	3127500	1772900000	167910000	189630000	24	24	24	-4.6264	-4.94735	-5.78969	-1.22134	-0.79519	0.346827	-5.66377	-5.02603	-6.57953	4.1415	2.56764	-0.513829
+	2.53992	-2.62682	Q4MR50	2996	FeS assembly protein SufD GN=sufD	28	28	28	74.4	74.4	74.4	46.884	0	323.31	3885800000	258	273840000	947580000	509910000	0	2981900	755470	400400000	732680000	1016000000	1682700	0	0	28	28	28	0.627793	0.839674	2.15073	-5.618	-6.66852	-6.89931	1.093	1.7922	1.32935	-3.94235	-3.66292	-3.70011
	0.967132	-2.68848	Q4MP63	5228	Chitin binding protein CBP21 GN=cbp	11	11	11	33	33	33	24.042	0	158.8	2248400000	126	947120	0	832440	69864000	78991000	14118000	0	1967300	3353400	1379500000	480840000	218010000	11	11	11	-6.2644	-6.27175	-7.00889	0.38429	-0.361628	-0.487146	-4.92889	-4.8541	-4.46567	4.73093	2.54992	0.320113
	1.32031	-2.7233	Q4MTT7	318	Zinc-binding dehydrogenase family protein GN=AQ16_318	11	11	11	44.3	44.3	44.3	36.787	0	29.088	88028000	21	0	4799300	0	0	0	156910	15524000	10995000	17479000	39074000	0	0	11	11	11	-5.77375	-4.97569	-5.66807	-6.32742	-7.26769	-5.16059	-3.36607	-2.99436	-3.47614	-2.08597	-4.60018	-3.89967
+	2.54366	-2.90121	Q4MMJ9	4277	Protein RecA GN=recA	16	16	16	67.6	67.6	67.6	37.297	0	170.49	1076700000	108	97836000	267400000	136320000	466580	666340	0	130880000	155260000	244470000	28034000	3146800	12172000	16	16	16	-1.01559	-0.257077	-0.563759	-5.14175	-4.87192	-5.09031	-0.160858	-1.19973	-0.644441	-2.51637	-2.62301	-1.26097
+	2.20418	-2.93759	Q4MPM3	1407	Uncharacterized protein GN=AQ16_1407	54	54	54	76.6	76.6	76.6	85.91	0	323.31	3602100000	366	466390000	1099600000	495310000	12935000	7225100	5051100	481930000	610610000	176440000	174600000	35271000	36748000	54	54	54	1.7805	1.56632	1.38347	-2.63433	-3.04649	-2.42146	1.46977	1.104	-0.60475	0.404054	1.05504	-0.748613
	1.01398	-2.97036	Q4MJ94	3834	Elongation factor P GN=efp	2	2	2	25.4	25.4	25.4	20.737	0	5.5704	390130000	18	34996000	62245000	37500000	0	0	0	68497000	91539000	95349000	0	0	0	2	2	2	-2.57676	-2.8087	-5.4409	-6.05998	-8.11641	-4.88699	-1.98843	-2.23386	-2.12015	-5.3702	-2.59043	-2.19166
+	2.19328	-3.01267	A0A0B5Z947	2396	Elongation factor Tu GN=tuf	32	32	32	93.7	93.7	93.7	42.938	0	323.31	41551000000	967	3029000000	11905000000	4070900000	30150000	44318000	17772000	4247600000	7516500000	9697500000	518860000	65185000	408660000	32	32	32	4.32343	4.9382	4.34593	-0.505524	-0.510991	-0.169586	4.48622	4.55085	5.12266	1.9096	2.20716	3.73516
+	2.70732	-3.02375	Q4MWC8	1559	Uncharacterized protein GN=AQ16_1559	4	4	4	42	42	42	12.376	0	174.68	342010000	68	0	0	2169400	11322000	13621000	2796700	1309000	12297000	3072400	128640000	57314000	109470000	4	4	4	-5.45001	-5.51334	-5.35603	-2.28028	-2.6311	-2.4755	-5.13481	-3.35469	-5.05265	-0.203535	1.18446	0.703455
+	2.02813	-3.04007	Q4MH32	2361	50S ribosomal protein L13 GN=rplM	12	12	12	77.9	77.9	77.9	16.428	0	91.779	2506500000	107	232490000	751480000	311890000	826550	874720	0	179780000	561570000	457540000	10042000	0	0	12	12	12	0.721627	1.17271	0.455866	-5.31622	-7.38388	-5.96637	0.0736612	0.752217	0.694395	-3.25984	-2.77211	-3.5143
+	3.13646	-3.06721	Q4MT72	850	Flagellar hook-associated protein 3 GN=flgL	13	13	13	60.3	60.3	60.3	32.07	0	71.982	413750000	47	40467000	67769000	41023000	0	0	0	68239000	105630000	88509000	2110400	0	0	13	13	13	-2.20687	-2.55655	-2.30355	-7.17812	-6.8333	-6.37364	-1.33204	-2.25427	-1.78219	-3.70692	-3.33823	-4.13828
+	2.55267	-3.07638	Q4MSG1	1152	Oligopeptidase GN=pz-A	12	12	12	26.1	26.1	26.1	66.201	0	129.04	224740000	44	2058800	2261100	1654800	6795800	15804000	8143400	8629600	21835000	4132400	93487000	14185000	45758000	12	12	12	-5.4393	-6.13917	-5.79322	-3.33368	-3.88591	-2.5621	-5.36527	-5.03561	-5.45851	0.0822399	-0.724124	0.089343
+	3.26023	-3.15716	Q4MP19	5768	Uncharacterized protein GN=AQ16_5768	10	10	10	56.2	56.2	56.2	15.832	0	76.574	683850000	152	0	0	0	13069000	20668000	3099300	0	0	0	419160000	103140000	124710000	10	10	10	-4.80699	-5.44144	-4.22705	-1.39552	-1.81151	-1.57558	-5.59622	-6.31686	-6.31481	1.89698	1.8062	0.9857
+	3.02724	-3.16344	Q4MWJ1	1619	Bacterial extracellular solute-binding s, 3 family protein GN=AQ16_1619	7	7	7	29.8	29.8	29.8	29.181	0	40.078	110280000	21	16079000	35773000	8436800	583370	0	0	1509100	20368000	13134000	14397000	0	0	7	7	7	-3.37224	-3.58128	-4.03076	-5.57723	-6.66899	-6.54072	-5.36203	-3.31858	-3.64712	-3.31508	-2.96365	-3.01789
+	2.54144	-3.22507	A0A0B5Z9D2	2393	50S ribosomal protein L4 GN=rplD	12	12	12	55.6	55.6	55.6	22.53	0	212.55	6842500000	180	931320000	1914000000	791270000	3942200	2839200	1290000	522760000	1346300000	1265600000	25171000	8313800	29718000	12	12	12	2.87582	2.34089	2.14078	-4.44553	-5.43601	-4.63155	1.77066	2.13784	2.39831	-2.23983	-1.70426	-0.893777
+	3.33519	-3.26788	Q4MGH3	5824	Putative phage major capsid protein GN=AQ16_5824	27	27	27	87.2	87.2	87.2	33.066	0	323.31	17022000000	543	68263000	154330000	115240000	29293000	52567000	12871000	3005100000	5786600000	6048900000	1264000000	233100000	252150000	27	27	27	-0.703729	-1.01215	-0.669635	-0.140095	-0.585585	-0.164786	3.99856	4.17705	4.33412	3.19132	3.29745	2.4244
+	2.32277	-3.52249	Q4MI20	2472	Ribose-phosphate pyrophosphokinase GN=prs	13	13	13	40.7	40.7	40.7	34.836	0	158.07	591950000	62	85755000	247800000	69434000	0	631890	0	30761000	74114000	71396000	12062000	0	0	13	13	13	-0.865544	-0.819727	-0.889186	-7.31222	-7.22973	-5.56302	-1.86676	-1.86778	-1.65108	-2.84034	-3.03961	-3.65757
	0.879412	-3.53478	Q4MP88	5203	NLP/P60 family protein GN=AQ16_5203	11	11	11	33	33	33	37.3	0	169.78	231250000	46	0	0	0	7110100	1594900	8237400	0	0	0	146560000	36754000	30993000	11	11	11	-6.37274	-5.64476	-5.53408	-3.21781	-7.94783	-2.53504	-5.35072	-4.55306	-6.1049	0.322192	-1.04077	-2.37776
+	1.4663	-3.5663	Q4MQK9	2025	Formate acetyltransferase GN=pflB	24	24	24	42.9	42.9	42.9	84.518	0	116.98	601880000	84	92478000	139610000	109910000	0	1089800	0	18683000	87197000	28256000	79806000	10422000	34428000	24	24	24	-0.893271	-1.59458	-1.18445	-4.77716	-4.34376	-4.71274	-2.666	-2.2648	-3.17143	-0.102613	-3.27667	0.244531
+	2.58279	-3.77419	Q4MJI2	2750	3-hydroxyacyl-[acyl-carrier-protein] dehydratase FabZ GN=fabZ	5	5	5	29.2	29.2	29.2	16.098	0	10.663	231060000	25	6682900	42361000	23682000	0	668820	524090	18466000	45886000	70960000	19250000	2388900	191550	5	5	5	-3.72518	-3.02768	-3.10373	-6.98342	-6.28752	-6.44903	-3.14032	-2.68835	-2.24994	-2.82196	-1.87936	-3.69607
+	1.35395	-4.2813	Q4MX58	4915	Matrixin family protein GN=AQ16_4915	8	8	8	59.4	59.4	59.4	19.136	0	303.39	453440000	83	0	0	0	4325400	7776700	2489800	0	5566800	2678700	373310000	40035000	17248000	8	8	8	-6.02757	-6.04912	-6.17255	-4.59255	-4.54832	-3.82876	-6.2675	-5.67331	-6.35395	1.58802	1.23524	-2.94899
+	2.04541	-4.31297	A0A0B5YV53	2546	Single-stranded DNA-binding protein GN=ssb	12	12	12	60.1	60.1	60.1	18.823	0	86.765	547230000	57	23687000	66442000	23483000	535320	1585900	415500	43523000	187560000	142890000	31822000	10328000	14961000	12	12	12	-2.73913	-2.79821	-3.22871	-6.08539	-3.69612	-5.30724	-2.31752	-1.17721	-0.970858	-1.83453	0.0806367	-0.395924
+	2.17758	-4.43733	Q4MNL0	4415	Urocanate hydratase GN=hutU	15	15	15	42	42	42	60.719	0	81.561	167070000	40	0	0	0	0	2021400	401910	600840	0	0	133770000	10351000	19928000	15	15	15	-4.04596	-5.04019	-7.09547	-6.31739	-4.22366	-5.1528	-4.99531	-6.60567	-4.07979	0.373858	-1.08626	-1.66946
+	1.21629	-4.54157	Q4MX60	4913	Calcineurin-like phosphoesterase family protein GN=AQ16_4913	37	37	32	79.6	79.6	71.8	57.908	0	323.31	6769800000	371	597740000	1772700000	940050000	1130700	2072000	224190	870890000	1195300000	1041200000	38246000	290400000	19808000	32	37	37	2.07172	2.90215	2.38804	-5.61149	-3.96058	-5.00261	1.81512	2.59742	2.46638	-1.34891	2.98121	-2.58227
+	3.33993	-4.83221	Q4MPZ8	2309	Bacterial extracellular solute-binding s, 5 Middle family protein GN=AQ16_2309	53	53	49	65.9	65.9	62.1	61.682	0	323.31	4594200000	403	358620	4124000	2259800	87817000	136660000	42325000	1973600	13961000	5435100	2774200000	466420000	1058700000	49	53	53	-4.84349	-7.16371	-5.51371	0.155307	-0.370355	-0.497788	-4.77609	-6.24526	-6.53168	5.03036	4.98291	3.77051
+	2.53519	-5.67041	Q4MJZ1	4342	Chitinase A GN=AQ16_4342	19	19	19	52.5	52.5	52.5	39.33	0	323.31	944850000	115	0	3478700	1517900	7124600	10992000	2598700	0	0	4758400	638030000	140630000	135720000	19	19	19	-5.06483	-4.82646	-4.71174	-3.44734	-3.20877	-4.5143	-5.06751	-5.88694	-4.54222	2.5648	2.87274	0.403262
+	2.52625	-6.99407	A0A0B5ZCP3	4546	Collagenase family protein GN=AQ16_4546	76	74	74	74.5	72.4	72.4	109.98	0	323.31	4842800000	535	3462600	5789900	6618600	14275000	43207000	24533000	997010	21955000	14897000	3621500000	564370000	521180000	74	74	76	-7.32688	-7.16991	-7.00473	-3.92891	-2.85276	-0.598133	-4.05207	-6.60176	-7.14636	4.81205	5.15813	3.63223
+	2.78372	-7.31641	Q4MI42	5335	Glucanase GN=AQ16_5335	26	26	26	67.1	67.1	67.1	50.561	0	323.31	3597800000	355	0	0	0	7224400	17666000	1939400	4384800	0	1800200	2654800000	376750000	533180000	26	26	26	-5.62289	-4.97057	-5.96493	-3.51997	-2.48559	-5.19315	-4.81871	-6.30851	-5.98738	4.70146	3.12436	2.92471
+	2.03254	-7.85451	Q4MGG0	2662	Peptidase M20/M25/M40 family protein GN=AQ16_2662	33	33	33	74	74	74	50.365	0	323.31	2143300000	206	1250300	7831700	5280000	2143100	2600800	1570500	843740	0	9242800	1774700000	140010000	197860000	33	33	33	-5.99567	-6.22694	-5.94017	-5.4947	-6.84984	-6.40212	-4.70571	-6.99089	-6.7461	4.17063	2.04115	-1.39492
+	2.94011	-9.19547	Q4MQE1	2089	Chitinase A1 GN=chiA1	52	52	52	78.6	78.6	78.6	74.109	0	323.31	3984300000	354	0	1751500	2162000	5273300	8974700	4164600	2306600	12627000	5149100	3273300000	467990000	200640000	52	52	52	-5.52206	-7.26148	-5.42503	-6.10592	-5.69012	-4.61087	-5.40045	-7.30367	-5.88352	4.91808	4.55101	1.71042

## Sheet: DataS3 G9241 Cell Proteome Expo
Significant	_Log of P value	Log2-Fold Change	Protein IDs	Locus Tag (AQ16_)	Fasta headers	Peptides	Razor + unique peptides	Unique peptides	Sequence coverage [%]	Unique + razor sequence coverage [%]	Unique sequence coverage [%]	Mol. weight [kDa]	Q-value	Score	Intensity	MS/MS count	Peptide counts (unique)	Peptide counts (razor+unique)	Peptide counts (all)	Number of proteins	Peptides IC37E3	Peptides IC37E2	Peptides IC37E1	Peptides IC25E3	Peptides IC25E2	Peptides IC25E1	Razor + unique peptides IC37E3	Razor + unique peptides IC37E2	Razor + unique peptides IC37E1	Razor + unique peptides IC25E3	Razor + unique peptides IC25E2	Razor + unique peptides IC25E1	Unique peptides IC37E3	Unique peptides IC37E2	Unique peptides IC37E1	Unique peptides IC25E3	Unique peptides IC25E2	Unique peptides IC25E1	Sequence lengths	Sequence length	Fraction average	Fraction 1	Sequence coverage IC37E3 [%]	Sequence coverage IC37E2 [%]	Sequence coverage IC37E1 [%]	Sequence coverage IC25E3 [%]	Sequence coverage IC25E2 [%]	Sequence coverage IC25E1 [%]	Intensity IC37E3
		25 °C compared to 37 °C
+	3.51057	5.09843	Q4MPI3	1368	Major cold shock protein CspA GN=cspA	7	7	7	83.6	83.6	83.6	7.4612	0	246.77	29944000000	340	7	7	7	1	6	6	5	7	7	7	6	6	5	7	7	7	6	6	5	7	7	7	67	67	1	329	83.6	83.6	83.6	83.6	83.6	83.6	652880000
+	2.67229	4.72431	Q4MKA3	4251	Uncharacterized protein GN=AQ16_4251	8	8	8	89.1	89.1	89.1	13.566	0	112.78	258180000	29	8	8	8	1	1	1	1	7	8	7	1	1	1	7	8	7	1	1	1	7	8	7	129	129	1	37	6.2	9.3	7.8	66.7	89.1	66.7	3298200
+	3.83618	4.48856	Q4MG35	175	Cold-inducible YdjO family protein GN=AQ16_175	6	6	6	68.9	68.9	68.9	7.1191	0	70.289	386080000	59	6	6	6	1	3	3	3	6	6	6	3	3	3	6	6	6	3	3	3	6	6	6	61	61	1	54	68.9	68.9	68.9	68.9	68.9	68.9	17538000
+	3.94117	4.1038	Q4MXF7	4821	Uncharacterized protein GN=AQ16_4821	2	2	2	13.1	13.1	13.1	28.794	0.099681	0.63692	391190000	9	2	2	2	1	0	1	1	2	2	2	0	1	1	2	2	2	0	1	1	2	2	2	252	252	1	11	0	3.6	3.6	13.1	13.1	13.1	0
+	3.74627	3.18248	Q4MW50;A0A0B5ZDM1	1487	Transglutaminase-like superfamily protein GN=AQ16_1487	33	33	33	69.3	69.3	69.3	64.551	0	212.25	1855600000	178	NaN	NaN	NaN	2	15	13	15	29	30	30	15	13	15	29	30	30	15	13	15	29	30	30	NaN	579	1	216	37.3	33.3	37.3	60.1	58	61.3	52867000
+	1.39467	3.06009	Q4MT64	858	Flagellar motor switch FliM family protein GN=AQ16_858	4	4	4	7.9	7.9	7.9	60.953	0.017217	1.4709	90991000	12	4	4	4	1	2	2	3	3	2	2	2	2	3	3	2	2	2	2	3	3	2	2	546	546	1	17	5.9	4	7.9	5.9	3.8	5.9	3804400
+	4.23741	2.7781	Q4MLS4	2611	FMN-dependent NADH-azoreductase GN=azoR4	12	12	12	72.6	72.6	72.6	22.796	0	70.021	1750500000	101	12	12	12	1	8	9	9	12	11	10	8	9	9	12	11	10	8	9	9	12	11	10	208	208	1	121	52.4	52.4	72.6	72.6	59.1	52.4	94923000
+	2.29119	2.57019	Q4MPI7	1372	Uncharacterized protein GN=AQ16_1372	6	6	6	25.2	25.2	25.2	23.676	0	16.295	57583000	11	6	6	6	1	3	2	2	4	5	4	3	2	2	4	5	4	3	2	2	4	5	4	218	218	1	23	17.4	11.5	7.3	15.1	25.2	22	2767800
+	3.95202	2.47471	Q4MGR7	659	Hemolytic enterotoxin family protein GN=AQ16_659	10	10	10	42.5	42.5	42.5	43.117	0	50.564	69236000	24	10	10	10	1	1	1	0	7	8	6	1	1	0	7	8	6	1	1	0	7	8	6	402	402	1	26	9.5	9.5	0	29.9	28.4	23.4	4170700
+	2.04096	2.41031	Q4MWC8	1559	Uncharacterized protein GN=AQ16_1559	3	3	3	37.5	37.5	37.5	12.376	0	15.088	126210000	12	3	3	3	1	2	1	3	2	3	3	2	1	3	2	3	3	2	1	3	2	3	3	112	112	1	15	22.3	15.2	37.5	26.8	37.5	37.5	8367300
+	6.11411	2.21556	Q4MG36	174	Major cold shock protein CspA GN=cspA	4	3	3	83.6	71.6	71.6	7.3251	0	323.31	4210900000	201	3	3	4	1	4	4	4	4	4	4	3	3	3	3	3	3	3	3	3	3	3	3	67	67	1	261	83.6	83.6	83.6	83.6	83.6	83.6	369970000
+	1.54679	2.20846	Q4MQ24	2908	SET domain protein GN=AQ16_2908	4	4	4	48.9	48.9	48.9	15.216	0	54.68	176040000	15	4	4	4	1	2	2	2	3	3	2	2	2	2	3	3	2	2	2	2	3	3	2	131	131	1	21	31.3	31.3	31.3	48.1	48.9	31.3	14080000
+	1.14071	2.19577	Q4MWV6;Q4MJX8	1725; 4355	Transposase family protein GN=AQ16_1725 ;Transposase family protein GN=AQ16_4355	3	3	3	32.6	32.6	32.6	19.826	0.091797	0.70188	158950000	7	NaN	NaN	NaN	2	2	2	1	2	2	2	2	2	1	2	2	2	2	2	1	2	2	2	NaN	172	1	12	24.4	13.4	5.2	13.4	13.4	13.4	19640000
+	1.40735	2.15103	Q4MWT3	1704	Rhodanese-like domain protein GN=AQ16_1704	9	9	8	62.9	62.9	62.9	20.465	0	33.837	117410000	20	8	9	9	1	4	1	2	8	8	9	4	1	2	8	8	9	4	0	2	7	7	8	186	186	1	40	33.3	5.4	21	58.6	58.6	62.9	8551900
+	2.05	2.09597	A0A0B5Z981	660	Hemolytic enterotoxin family protein GN=AQ16_660	10	10	10	42.5	42.5	42.5	43.729	0	7.6061	59998000	18	10	10	10	1	1	1	1	5	7	6	1	1	1	5	7	6	1	1	1	5	7	6	386	386	1	24	2.1	6.7	2.1	25.6	30.1	29	2236700
+	1.6444	1.98596	Q4MNT3	3777	Uncharacterized protein GN=AQ16_3777	2	2	2	11.7	11.7	11.7	18.861	0	8.3302	61835000	7	2	2	2	1	1	1	1	2	2	2	1	1	1	2	2	2	1	1	1	2	2	2	162	162	1	10	6.8	6.8	6.8	11.7	11.7	11.7	5389300
+	2.36343	1.94318	Q4MS86	3545	Uncharacterized protein GN=AQ16_3545	3	3	3	47	47	47	7.4913	0	8.7809	51742000	13	3	3	3	1	0	0	0	3	3	3	0	0	0	3	3	3	0	0	0	3	3	3	66	66	1	14	0	0	0	47	47	47	0
+	2.64538	1.87221	A0A0B5ZC30	5364	GIY-YIG catalytic domain protein GN=AQ16_5364	9	9	9	79.8	79.8	79.8	14.842	0	62.996	692560000	67	9	9	9	1	7	6	7	9	9	9	7	6	7	9	9	9	7	6	7	9	9	9	124	124	1	71	66.1	50	56.5	79.8	79.8	79.8	57453000
+	1.46263	1.73004	Q4MHU5	4552	N-acetylmuramoyl-L-alanine amidase family protein GN=AQ16_4552	12	12	8	42.6	42.6	36.7	45.46	0	54.814	104460000	20	8	12	12	1	5	6	5	9	7	7	5	6	5	9	7	7	3	4	3	7	4	5	411	411	1	49	18.2	24.3	19.7	35.3	25.8	27.3	21151000
+	1.55699	1.72784	A0A0B5Z3C3	3508	Uncharacterized protein GN=AQ16_3508	3	3	3	42.7	42.7	42.7	9.5819	0	40.758	192140000	19	3	3	3	1	3	3	3	3	3	3	3	3	3	3	3	3	3	3	3	3	3	3	82	82	1	23	42.7	42.7	42.7	42.7	42.7	42.7	23008000
+	2.31433	1.66433	Q4MWG5	1593	Uncharacterized protein GN=AQ16_1593	9	9	9	46.1	46.1	46.1	17.764	0	38.402	908180000	74	9	9	9	1	9	8	7	8	9	9	9	8	7	8	9	9	9	8	7	8	9	9	154	154	1	98	46.1	44.2	43.5	44.2	46.1	46.1	80175000
+	2.7612	1.61929	Q4MKB8	4236	Ribosomal L7Ae/L30e/S12e/Gadd45 family protein GN=AQ16_4236	8	8	8	76.7	76.7	76.7	11.624	0	18.434	280950000	39	8	8	8	1	7	5	7	7	7	8	7	5	7	7	7	8	7	5	7	7	7	8	103	103	1	50	76.7	56.3	76.7	64.1	68.9	76.7	41633000
+	2.66315	1.60567	Q4MU99	827	Flagellin GN=AQ16_827	16	7	7	78.4	32	32	30.08	0	77.752	225470000	41	7	7	16	1	16	14	16	15	15	16	7	5	7	6	6	7	7	5	7	6	6	7	278	278	1	60	78.4	70.9	78.4	73.7	78.4	78.4	31337000
+	2.09795	1.57723	A0A0B5ZFR7	576	Bacterial SH3 domain protein GN=AQ16_576	26	26	26	94.8	94.8	94.8	44.112	0	323.31	3699300000	254	26	26	26	1	20	23	22	25	22	21	20	23	22	25	22	21	20	23	22	25	22	21	422	422	1	258	79.9	89.6	81.8	92.9	80.3	80.3	374250000
+	1.11992	1.56333	A0A0B5Z1L1	210	Pseudouridine synthase GN=AQ16_210	9	9	9	51.9	51.9	51.9	26.828	0	34.581	109190000	30	9	9	9	1	5	1	3	5	8	8	5	1	3	5	8	8	5	1	3	5	8	8	235	235	1	43	23.4	9.8	21.3	28.1	46.8	46.4	19663000
+	2.28071	1.55045	Q4MU96	830	Flagellin GN=AQ16_830	17	13	13	77.9	59.6	59.6	32.704	0	29.582	210610000	42	13	13	17	1	13	10	13	16	14	12	9	6	9	12	10	8	9	6	9	12	10	8	307	307	1	64	64.8	56.4	60.9	77.9	66.8	60.9	27624000
+	2.40558	1.52044	Q4MSW9	937	Uncharacterized protein GN=AQ16_937	6	6	6	71.9	71.9	71.9	13.808	0	24.086	85958000	17	6	6	6	1	4	2	3	5	3	4	4	2	3	5	3	4	4	2	3	5	3	4	114	114	1	27	57.9	23.7	50	50	50	63.2	15551000
+	1.82982	1.50427	Q4MN92	3123	Cold shock protein CspD GN=cspD	5	4	4	92.4	80.3	80.3	7.2389	0	245.95	19585000000	1025	4	4	5	1	5	5	5	5	5	5	4	4	4	4	4	4	4	4	4	4	4	4	66	66	1	1173	92.4	92.4	92.4	92.4	92.4	92.4	2480200000
+	2.71311	1.47789	A0A0B5Z1A5	1573	Uncharacterized protein GN=AQ16_1573	10	10	10	50.2	50.2	50.2	35.776	0	12.395	94414000	41	10	10	10	1	4	3	7	7	8	7	4	3	7	7	8	7	4	3	7	7	8	7	317	317	1	52	15.1	22.7	33.1	37.2	38.8	36	7439000
+	3.00452	1.46764	Q4MJY4	4349	1-phosphofructokinase GN=pfkB	15	15	15	79.2	79.2	79.2	32.451	0	94.911	435570000	49	15	15	15	1	8	5	7	11	12	11	8	5	7	11	12	11	8	5	7	11	12	11	303	303	1	77	50.5	31	43.6	68.6	68.6	54.1	52498000
+	1.8561	1.45082	A0A0B5ZDM5	1683	3D domain protein GN=AQ16_1683	16	16	14	51	51	44.9	43.635	0	249.01	632970000	71	14	16	16	1	11	11	13	15	14	15	11	11	13	15	14	15	10	10	12	13	12	13	414	414	1	123	36	37.9	44.7	48.8	46.9	50.2	81063000
+	2.14994	1.44716	Q4MNY8	3727	Cytidine deaminase GN=cdd	9	9	9	86.4	86.4	86.4	14.425	0	60.861	777180000	79	9	9	9	1	6	7	7	7	8	7	6	7	7	7	8	7	6	7	7	7	8	7	132	132	1	69	61.4	72	49.2	81.1	84.1	81.1	72513000
	0.835335	1.43959	Q4MTP8	3989	Glucosamine-6-phosphate deaminase GN=nagB	7	7	7	50.4	50.4	50.4	28.999	0	28.202	132910000	23	7	7	7	1	2	3	4	6	5	3	2	3	4	6	5	3	2	3	4	6	5	3	262	262	1	29	13.7	20.6	27.5	43.5	30.2	18.7	14782000
	0.715994	1.43353	Q4MLU1	2596	Thioesterase superfamily protein GN=AQ16_2596	7	7	7	66.5	66.5	66.5	18.939	0	11.355	114100000	19	7	7	7	1	2	5	6	4	4	7	2	5	6	4	4	7	2	5	6	4	4	7	170	170	1	47	18.2	60	66.5	40.6	32.9	66.5	16135000
+	1.35377	1.41568	A0A0B5YWY6	2123	DNA binding, excisionase family domain protein GN=AQ16_2123	8	8	8	94.7	94.7	94.7	9.1662	0	59.874	198190000	29	8	8	8	1	6	6	6	8	8	8	6	6	6	8	8	8	6	6	6	8	8	8	76	76	1	50	90.8	93.4	93.4	94.7	94.7	94.7	24093000
+	2.63486	1.39868	Q4MII6	2783	Cell wall hydrolase GN=AQ16_2783	29	29	29	80.8	80.8	80.8	61.123	0	187.67	1788700000	153	29	29	29	1	25	19	19	27	25	26	25	19	19	27	25	26	25	19	19	27	25	26	579	579	1	213	72.9	59.1	54.4	80.8	74.1	80.8	234140000
+	2.06297	1.32305	Q4MI95	2417	2-C-methyl-D-erythritol 2,4-cyclodiphosphate synthase GN=ispF	6	6	6	82.9	82.9	82.9	17.219	0	26.078	157440000	35	6	6	6	1	4	4	5	6	6	6	4	4	5	6	6	6	4	4	5	6	6	6	158	158	1	43	46.8	51.3	63.9	82.9	82.9	82.9	11237000
	0.721718	1.3093	Q4MPT4	2252	Antitoxin EndoAI GN=ndoAI	2	2	2	35.8	35.8	35.8	10.812	0	19.688	41163000	16	2	2	2	1	1	1	1	2	1	1	1	1	1	2	1	1	1	1	1	2	1	1	95	95	1	22	23.2	23.2	23.2	35.8	23.2	23.2	4306700
	0.860418	1.30727	Q4MQL7	2017	Uncharacterized protein GN=AQ16_2017	2	2	2	30.5	30.5	30.5	12.257	0	5.57	59256000	7	2	2	2	1	2	2	1	2	2	2	2	2	1	2	2	2	2	2	1	2	2	2	105	105	1	14	30.5	30.5	16.2	30.5	30.5	30.5	7543400
+	2.1183	1.3015	Q4MY29	4598	DinB superfamily protein GN=AQ16_4598	8	8	8	71.5	71.5	71.5	17.22	0	66.86	211020000	30	8	8	8	1	4	4	6	6	5	6	4	4	6	6	5	6	4	4	6	6	5	6	151	151	1	41	38.4	38.4	60.3	59.6	40.4	51.7	22998000
	1.19278	1.29412	Q4MSI3	1131	ABC transporter family protein GN=AQ16_1131	7	7	7	42.7	42.7	42.7	33.506	0	6.8805	51939000	12	7	7	7	1	2	4	4	3	5	4	2	4	4	3	5	4	2	4	4	3	5	4	300	300	1	26	8.7	27.7	26.7	19.7	26.3	29.3	2091100
+	2.60445	1.28968	Q4MUR1	671	Bacterial extracellular solute-binding s, 5 Middle family protein GN=AQ16_671	5	5	5	18.3	18.3	18.3	62.041	0.006135	2.1599	53209000	10	5	5	5	1	1	1	1	2	4	4	1	1	1	2	4	4	1	1	1	2	4	4	542	542	1	16	4.8	5.9	1.8	6.6	15.1	15.7	2560500
	1.65154	1.28905	Q4MVT4	3354	Glyoxalase/Bleomycin resistance /Dioxygenase superfamily protein GN=AQ16_3354	9	9	9	93.7	93.7	93.7	15.806	0	81.083	941540000	118	9	9	9	1	8	8	7	8	7	8	8	8	7	8	7	8	8	8	7	8	7	8	143	143	1	144	93.7	93.7	93.7	93.7	93.7	93.7	115220000
	1.05429	1.27453	Q4MMF5	621	Glyoxalase/Bleomycin resistance /Dioxygenase superfamily protein GN=AQ16_621	7	7	7	66.2	66.2	66.2	15.832	0	7.9129	86614000	17	7	7	7	1	2	3	4	5	2	3	2	3	4	5	2	3	2	3	4	5	2	3	139	139	1	28	17.3	23	43.9	66.2	17.3	23	5891700
	1.02319	1.25447	Q4MSX0	936	YppF-like family protein GN=AQ16_936	3	3	3	60.3	60.3	60.3	7.2272	0	8.559	51668000	15	3	3	3	1	3	3	3	3	3	3	3	3	3	3	3	3	3	3	3	3	3	3	63	63	1	22	60.3	60.3	60.3	60.3	60.3	60.3	3897400
	1.35634	1.23246	Q4MNL6	4409	Uncharacterized protein GN=AQ16_4409	7	7	7	79.6	79.6	79.6	11.734	0	19.044	212130000	46	7	7	7	1	4	5	5	6	5	5	4	5	5	6	5	5	4	5	5	6	5	5	98	98	1	51	54.1	70.4	70.4	55.1	55.1	55.1	26007000
	0.900862	1.23016	Q4MT86	836	Flagellar hook protein FlgE GN=AQ16_836	5	5	5	19.1	19.1	19.1	43.202	0	14.505	44285000	24	5	5	5	1	4	4	2	4	4	4	4	4	2	4	4	4	4	4	2	4	4	4	409	409	1	25	14.4	16.9	8.8	15.6	14.7	15.6	11266000
	1.6744	1.20305	Q4MNG3	4462	Iron-sulfur cluster biosynthesis family protein GN=AQ16_4462	6	6	6	47.9	47.9	47.9	10.939	0	86.267	672570000	59	6	6	6	1	4	5	5	5	5	5	4	5	5	5	5	5	4	5	5	5	5	5	96	96	1	44	40.6	40.6	40.6	40.6	47.9	47.9	79700000
	1.32747	1.19997	Q4MIZ7	2141	Uncharacterized protein GN=AQ16_2141	6	6	6	43.6	43.6	43.6	19.383	0	8.1061	35088000	9	6	6	6	1	3	2	0	5	3	4	3	2	0	5	3	4	3	2	0	5	3	4	172	172	1	18	27.9	15.7	0	42.4	26.7	36.6	4801600
	2.40385	1.19773	Q4MU36	230	Bacterial regulatory, arsR family protein GN=AQ16_230	11	11	11	85.9	85.9	85.9	11.357	0	98.452	1641500000	101	11	11	11	1	10	9	8	11	9	9	10	9	8	11	9	9	10	9	8	11	9	9	99	99	1	133	84.8	84.8	84.8	85.9	84.8	84.8	243220000
	1.24365	1.17764	Q4MMZ4	3902	Uncharacterized protein GN=AQ16_3902	4	4	4	75.9	75.9	75.9	9.6415	0	14.598	219360000	35	4	4	4	1	4	3	4	4	4	3	4	3	4	4	4	3	4	3	4	4	4	3	83	83	1	45	75.9	71.1	75.9	75.9	75.9	71.1	33197000
	0.78163	1.17625	Q4MJG8	2739	Stage II sporulation protein Q GN=spoIIQ	3	3	3	15.6	15.6	15.6	32.462	0.053163	0.94244	152790000	8	3	3	3	1	2	1	3	3	3	3	2	1	3	3	3	3	2	1	3	3	3	3	301	301	1	16	6.6	5.6	15.6	15.6	15.6	15.6	20349000
	1.26984	1.16351	Q4MTK2	4035	Putative transcriptional regulator GN=AQ16_4035	7	7	7	26.8	26.8	26.8	37.508	0	32.078	67498000	17	7	7	7	1	4	3	3	4	4	6	4	3	3	4	4	6	4	3	3	4	4	6	340	340	1	27	17.4	10.6	14.1	17.4	17.6	23.5	6612900
	2.45802	1.13716	Q4MI10	2482	Ribonuclease M5 GN=rnmV	7	7	7	57.8	57.8	57.8	20.858	0	32.484	233880000	42	7	7	7	1	6	5	4	7	6	6	6	5	4	7	6	6	6	5	4	7	6	6	185	185	1	51	51.9	50.3	45.4	57.8	57.8	57.3	33803000
	1.95853	1.13354	Q4MU98	828	Flagellin GN=AQ16_828	20	20	11	81.5	81.5	36.4	30.91	0	235.43	327560000	45	11	20	20	1	17	15	17	19	17	20	17	15	17	19	17	20	8	6	8	10	8	11	286	286	1	178	76.6	73.4	79.4	80.1	77.3	81.5	53762000
	2.09676	1.11206	A0A0B5Z4I6	4090	UPF0223 protein AQ16_4090 GN=AQ16_4090	9	9	9	88.8	88.8	88.8	10.814	0	42.198	415770000	54	9	9	9	1	7	6	6	8	7	6	7	6	6	8	7	6	7	6	6	8	7	6	89	89	1	78	88.8	88.8	88.8	88.8	88.8	88.8	44414000
	1.8237	1.1114	Q4MWT2	1703	Rhodanese-like domain protein GN=AQ16_1703	6	6	6	39.4	39.4	39.4	41.745	0	5.5281	48644000	8	6	6	6	1	2	0	0	5	3	2	2	0	0	5	3	2	2	0	0	5	3	2	376	376	1	12	12.5	0	0	34	16.8	10.6	18813000
	1.69783	1.09879	Q4MLX1	2570	ATP-dependent RNA helicase DbpA GN=dbpA	17	17	17	47	47	47	54.135	0	58.814	696410000	51	17	17	17	1	7	7	8	12	15	13	7	7	8	12	15	13	7	7	8	12	15	13	481	481	1	82	19.1	24.1	26.4	35.6	43.7	37.4	173610000
	5.02685	1.07834	A0A0B5YW32	4703	Mycolic acid cyclopropane synthetase family protein GN=AQ16_4703	6	6	6	39.4	39.4	39.4	28.813	0.052027	0.96824	139600000	9	6	6	6	1	4	2	3	2	2	4	4	2	3	2	2	4	4	2	3	2	2	4	251	251	1	24	25.1	6.8	17.1	6.8	6.8	28.7	16876000
	1.37212	1.07092	Q4MGL7	2485	Transition state regulatory protein AbrB GN=abrB	11	11	10	86.2	86.2	78.7	10.49	0	282.79	10084000000	291	10	11	11	1	10	9	10	11	10	10	10	9	10	11	10	10	9	8	9	10	9	9	94	94	1	286	86.2	86.2	86.2	86.2	86.2	86.2	685380000
	1.69093	1.07023	Q4MNJ5	4430	Uncharacterized protein GN=AQ16_4430	5	5	5	81.7	81.7	81.7	9.5308	0	15.888	221390000	31	5	5	5	1	2	4	3	5	3	3	2	4	3	5	3	3	2	4	3	5	3	3	82	82	1	30	51.2	75.6	67.1	81.7	42.7	65.9	15047000
	1.46414	1.05571	A0A0B5ZG67	4063	Uncharacterized protein GN=AQ16_4063	5	5	5	44.9	44.9	44.9	9.1192	0	90.603	3356200000	133	5	5	5	1	5	5	5	5	5	5	5	5	5	5	5	5	5	5	5	5	5	5	78	78	1	153	44.9	44.9	44.9	44.9	44.9	44.9	629220000
	5.07593	1.04985	Q4MJM0	3695	CRS1 / YhbY domain protein GN=AQ16_3695	6	6	6	63.9	63.9	63.9	11.062	0	40.983	1876600000	71	6	6	6	1	5	5	5	5	6	5	5	5	5	5	6	5	5	5	5	5	6	5	97	97	1	71	60.8	60.8	60.8	60.8	63.9	60.8	301980000
	0.661448	1.04833	Q4MXQ5	4724	Noncanonical pyrimidine nucleotidase, YjjG family GN=AQ16_4724	6	6	6	45.9	45.9	45.9	26.535	0	34.574	48057000	13	6	6	6	1	4	3	2	6	3	4	4	3	2	6	3	4	4	3	2	6	3	4	233	233	1	24	27.9	21.9	12.4	45.9	24.9	32.6	7259500
	3.21514	1.04729	A0A0B5Z3U2	123	Uncharacterized protein GN=AQ16_123	17	17	17	49.8	49.8	49.8	51.01	0	43.241	260540000	73	17	17	17	1	10	9	8	12	15	13	10	9	8	12	15	13	10	9	8	12	15	13	454	454	1	94	35.5	33	30	41.6	46	44.7	34447000
	1.01652	1.04155	Q4MLA3	ddl	D-alanine--D-alanine ligase GN=ddl	5	5	5	23.7	23.7	23.7	33.728	0.0082151	1.8165	49107000	11	5	5	5	1	3	2	1	3	3	3	3	2	1	3	3	3	3	2	1	3	3	3	304	304	1	21	18.1	16.1	9.5	18.4	18.1	18.1	5821600
	3.10592	1.03022	Q4MGD2	2380	30S ribosomal protein S8 GN=rpsH	15	15	14	75	75	75	14.882	0	232.16	21623000000	378	14	15	15	1	15	15	15	15	15	15	15	15	15	15	15	15	14	14	14	14	14	14	132	132	1	417	75	75	75	75	75	75	3443800000
	2.36604	1.01912	Q4MVZ4	3415	Alkaline phosphatase synthesis transcriptional regulatory protein phoP GN=phoP	5	5	5	22.6	22.6	22.6	27.661	0	6.0322	55113000	19	5	5	5	1	3	3	2	4	4	3	3	3	2	4	4	3	3	3	2	4	4	3	239	239	1	23	13	12.6	9.6	16.7	18.4	12.6	2663200
	2.59459	1.01657	A0A0B5Z5U0	4095	GTP-binding protein TypA/BipA GN=typA	36	36	36	70	70	70	68.92	0	323.31	12504000000	777	36	36	36	1	35	35	34	34	35	34	35	35	34	34	35	34	35	35	34	34	35	34	613	613	1	872	70	68.7	69	67.7	70	69	1873100000
	1.59282	1.00425	Q4MQ33	2899	Spermidine N(1)-acetyltransferase GN=speG	4	4	4	45.6	45.6	45.6	20.674	0	4.6952	17118000	12	4	4	4	1	2	2	0	3	3	2	2	2	0	3	3	2	2	2	0	3	3	2	171	171	1	14	14.6	26.3	0	27.5	27.5	14.6	998680
	0.688836	0.999565	Q4MPY3	2297	1-acylglycerol-3-phosphate O-acyltransferases domain protein GN=AQ16_2297	4	4	4	24.9	24.9	24.9	22.453	0	5.5961	52906000	9	4	4	4	1	3	3	2	4	4	2	3	3	2	4	4	2	3	3	2	4	4	2	201	201	1	18	19.9	17.9	13.4	24.9	24.9	13.4	7363900
	1.3158	0.998666	A0A0B5Z3I4	2823	NlpC/P60 family protein GN=AQ16_2823	13	13	13	37.9	37.9	37.9	51.246	0	22.248	182940000	35	13	13	13	1	5	6	6	10	10	10	5	6	6	10	10	10	5	6	6	10	10	10	467	467	1	55	13.5	18.2	21	29.3	24.6	28.7	13555000
	1.8161	0.99808	A0A0B5YUW5	2504	Nucleoid-associated protein AQ16_2504 GN=AQ16_2504	9	9	9	80.7	80.7	80.7	11.863	0	264.74	5489600000	165	9	9	9	1	8	9	9	9	9	8	8	9	9	9	9	8	8	9	9	9	9	8	109	109	1	176	73.4	80.7	80.7	80.7	80.7	78.9	850140000
	2.16512	0.977223	Q4MN75	1891	Bacterial regulatory, arsR family protein GN=AQ16_1891	6	6	6	80	80	80	11.196	0	68.856	434040000	38	6	6	6	1	4	5	5	6	6	5	4	5	5	6	6	5	4	5	5	6	6	5	95	95	1	47	71.6	80	80	80	80	80	71569000
	4.22814	0.973691	Q4MM57	1338	S1 RNA binding domain protein GN=AQ16_1338	17	17	17	64.4	64.4	64.4	32.899	0	76.622	1003000000	162	17	17	17	1	14	12	14	13	16	15	14	12	14	13	16	15	14	12	14	13	16	15	284	284	1	170	51.4	46.1	52.5	52.1	64.4	59.2	145570000
	1.61919	0.97209	Q4MTG4	4074	UPF0356 protein AQ16_4074 GN=AQ16_4074	7	7	7	78.6	78.6	78.6	8.2473	0	40.433	2007600000	80	7	7	7	1	5	5	5	7	5	5	5	5	5	7	5	5	5	5	5	7	5	5	70	70	1	78	78.6	78.6	78.6	78.6	78.6	78.6	291320000
	2.26478	0.970126	Q4MS69	3559	Porphobilinogen deaminase GN=hemC	14	14	14	58.6	58.6	58.6	33.651	0	43.648	412840000	71	14	14	14	1	14	9	11	12	12	11	14	9	11	12	12	11	14	9	11	12	12	11	309	309	1	106	58.6	43.4	42.4	52.4	51.5	48.9	74839000
	1.5754	0.962205	Q4MJ59	4180	DNA-directed RNA polymerase subunit omega GN=rpoZ	8	8	8	92.9	92.9	92.9	7.7339	0	94.099	3403300000	133	8	8	8	1	4	6	4	5	5	6	4	6	4	5	5	6	4	6	4	5	5	6	70	70	1	116	84.3	87.1	84.3	84.3	87.1	92.9	504600000
	1.88527	0.961753	A0A0B5ZER3	2371	Translation initiation factor IF-1 GN=infA	5	5	5	77.8	77.8	77.8	8.1855	0	171.48	9607300000	308	5	5	5	1	4	4	4	5	5	5	4	4	4	5	5	5	4	4	4	5	5	5	72	72	1	336	77.8	77.8	77.8	77.8	77.8	77.8	1546600000
	1.33328	0.954186	Q4MIJ7	2798	Glyoxalase/Bleomycin resistance /Dioxygenase superfamily protein GN=AQ16_2798	6	6	6	63.5	63.5	63.5	14.274	0	36.079	305430000	67	6	6	6	1	5	6	6	5	5	5	5	6	6	5	5	5	5	6	6	5	5	5	126	126	1	63	62.7	63.5	63.5	62.7	62.7	62.7	48210000
	1.55828	0.943294	Q4MXJ4	4784	NETI family protein GN=AQ16_4784	6	6	6	77.3	77.3	77.3	7.6969	0	22.655	168310000	24	6	6	6	1	5	5	5	6	6	4	5	5	5	6	6	4	5	5	5	6	6	4	66	66	1	38	62.1	65.2	77.3	77.3	77.3	50	15352000
	1.63674	0.941184	Q4MWI3	1611	UPF0342 protein AQ16_1611 GN=AQ16_1611	11	11	11	85.6	85.6	85.6	13.564	0	152.26	7297300000	248	11	11	11	1	11	11	11	11	11	11	11	11	11	11	11	11	11	11	11	11	11	11	118	118	1	297	85.6	85.6	85.6	85.6	85.6	85.6	1169800000
	0.597431	0.9388	A0A0B5ZFW9	4313	Phenazine biosynthesis, PhzF family protein GN=AQ16_4313	4	4	4	30.1	30.1	30.1	32.592	0	11.664	68210000	11	4	4	4	1	3	2	3	3	3	3	3	2	3	3	3	3	3	2	3	3	3	3	286	286	1	22	26.6	9.1	26.6	26.6	20.6	18.5	10453000
	1.18988	0.932522	Q4MQG4	2066	UPF0435 protein AQ16_2066 GN=AQ16_2066	8	8	8	94.6	94.6	94.6	8.6519	0	68.335	1222200000	96	8	8	8	1	6	7	6	7	8	7	6	7	6	7	8	7	6	7	6	7	8	7	74	74	1	80	94.6	94.6	94.6	87.8	94.6	94.6	206710000
	1.61607	0.931388	Q4MRY9	3637	Putative pre-16S rRNA nuclease GN=AQ16_3637	9	9	9	62.8	62.8	62.8	15.304	0	18.815	276340000	47	9	9	9	1	7	6	6	8	7	6	7	6	6	8	7	6	7	6	6	8	7	6	137	137	1	55	53.3	46.7	46.7	62.8	53.3	46.7	54017000
	2.23966	0.930942	A0A0B5ZAI7	2395	30S ribosomal protein S10 GN=rpsJ	12	12	12	73.5	73.5	73.5	11.684	0	243.85	35529000000	606	12	12	12	1	11	11	11	11	11	12	11	11	11	11	11	12	11	11	11	11	11	12	102	102	1	602	73.5	73.5	73.5	73.5	73.5	73.5	6322600000
	2.96494	0.906647	Q4MJX9	hfq	RNA-binding protein Hfq GN=hfq	5	5	5	83.8	83.8	83.8	8.6459	0	21.636	388510000	40	5	5	5	1	5	5	5	4	5	5	5	5	5	4	5	5	5	5	5	4	5	5	74	74	1	51	83.8	83.8	83.8	74.3	83.8	83.8	59057000
	1.33103	0.904625	Q4MLG6	2545	30S ribosomal protein S6 GN=rpsF	14	14	14	91.7	91.7	91.7	11.299	0	323.31	55530000000	978	14	14	14	1	12	12	12	12	14	12	12	12	12	12	14	12	12	12	12	12	14	12	96	96	1	1034	88.5	88.5	88.5	88.5	91.7	88.5	9749600000
	2.95054	0.896078	Q4MGX3	4158	Pseudouridine synthase GN=AQ16_4158	16	16	16	59.9	59.9	59.9	33.99	0	202.62	1178500000	132	16	16	16	1	15	13	13	14	15	14	15	13	13	14	15	14	15	13	13	14	15	14	302	302	1	160	59.9	53.3	53.3	53.3	59.9	56.6	193940000
	1.13161	0.878919	Q4MTD6	4102	UPF0358 protein AQ16_4102 GN=AQ16_4102	7	7	7	78.9	78.9	78.9	10.74	0	62.117	699700000	62	7	7	7	1	5	7	6	7	7	6	5	7	6	7	7	6	5	7	6	7	7	6	95	95	1	77	70.5	78.9	78.9	78.9	78.9	78.9	63586000
	2.68277	0.8745	Q4MS46	3582	GTPase Obg GN=cgtA	32	32	32	82.7	82.7	82.7	47.21	0	321.03	4148500000	335	32	32	32	1	28	26	28	27	30	29	28	26	28	27	30	29	28	26	28	27	30	29	428	428	1	356	78.5	76.2	78.5	75	81.8	81.8	618420000
	1.72742	0.874389	Q4MWE4	1574	N-acetylmuramoyl-L-alanine amidase family protein GN=AQ16_1574	23	23	23	61.6	61.6	61.6	58.119	0	88.671	368260000	68	23	23	23	1	14	10	12	17	12	19	14	10	12	17	12	19	14	10	12	17	12	19	529	529	1	124	40.5	28.2	36.3	47.8	31.6	55.6	48884000
	1.06869	0.870177	Q4MIH8	2777	3D domain protein GN=AQ16_2777	8	8	6	41.7	41.7	29.7	30.685	0	24.75	37952000	14	6	8	8	1	1	1	2	6	6	6	1	1	2	6	6	6	1	1	2	4	4	4	290	290	1	34	7.9	7.9	12.4	33.1	33.1	33.1	2181600
	2.91246	0.868336	Q4MI21	2471	Peptidyl-tRNA hydrolase GN=pth	11	11	11	72	72	72	21.082	0	19.727	452660000	47	11	11	11	1	9	6	10	10	9	10	9	6	10	10	9	10	9	6	10	10	9	10	186	186	1	81	65.1	46.2	68.8	68.8	65.1	68.8	82266000
	2.6603	0.866219	Q4MGT1	2651	Agmatinase GN=speB	24	24	24	94.5	94.5	94.5	32.389	0	185.97	2832900000	271	24	24	24	1	19	17	19	21	18	20	19	17	19	21	18	20	19	17	19	21	18	20	290	290	1	295	94.5	90.7	94.5	94.5	88.6	94.5	418530000
	0.891104	0.864228	Q4MUL6	715	N-acetylmuramoyl-L-alanine amidase family protein GN=AQ16_715	4	4	4	20.3	20.3	20.3	46.007	0.00079681	2.7405	31781000	8	4	4	4	1	2	0	2	3	2	2	2	0	2	3	2	2	2	0	2	3	2	2	414	414	1	13	10.4	0	13.8	12.8	10.4	10.4	5595400
	1.08514	0.86343	Q4MY19	4607	Uncharacterized protein GN=AQ16_4607	8	8	8	72.4	72.4	72.4	13.292	0	11.438	234440000	19	8	8	8	1	5	6	4	6	7	6	5	6	4	6	7	6	5	6	4	6	7	6	116	116	1	39	46.6	66.4	35.3	46.6	50.9	50.9	35317000
	0.809787	0.853455	Q4MRY6	3640	O-methyltransferase GN=AQ16_3640	8	8	8	55.4	55.4	55.4	24.686	0	6.4257	85599000	22	8	8	8	1	3	3	2	3	4	6	3	3	2	3	4	6	3	3	2	3	4	6	213	213	1	27	25.4	33.8	11.3	23.9	37.1	41.3	14875000
	3.80376	0.85206	A0A0B5Z3L3	2386	50S ribosomal protein L29 GN=rpmC	9	9	9	75.8	75.8	75.8	7.768	0	95.637	22559000000	251	9	9	9	1	8	9	9	8	9	8	8	9	9	8	9	8	8	9	9	8	9	8	66	66	1	248	72.7	75.8	75.8	75.8	75.8	75.8	2907400000
	2.88444	0.851022	Q4MMK1	4279	YmdB-like family protein GN=AQ16_4279	26	26	26	93.2	93.2	93.2	29.084	0	277.22	1417000000	170	26	26	26	1	19	18	18	17	21	25	19	18	18	17	21	25	19	18	18	17	21	25	264	264	1	201	87.9	86.4	88.6	87.1	92.4	93.2	218230000
	1.93264	0.850317	Q4MS73	3555	Peroxiredoxin, Ohr subfamily protein GN=AQ16_3555	7	7	7	63	63	63	14.271	0	29.532	371280000	36	7	7	7	1	5	4	5	7	6	5	5	4	5	7	6	5	5	4	5	7	6	5	138	138	1	51	51.4	44.2	51.4	63	63	55.8	62016000
	1.13405	0.849457	Q4MM77	1319	ComZ family protein GN=AQ16_1319	5	5	5	64.9	64.9	64.9	8.4967	0	27.187	755040000	83	5	5	5	1	4	5	5	5	5	5	4	5	5	5	5	5	4	5	5	5	5	5	74	74	1	95	59.5	64.9	64.9	64.9	64.9	64.9	113640000
	2.97272	0.849232	A0A0B5Z5D3	3731	Transcriptional repressor CcpN GN=ccpN	10	10	10	51.9	51.9	51.9	23.431	0	37.481	136260000	36	10	10	10	1	7	7	6	8	10	9	7	7	6	8	10	9	7	7	6	8	10	9	210	210	1	53	44.3	45.2	38.1	48.1	51.9	51	21664000
	1.47729	0.846965	Q4MRQ5	418	Glutathione peroxidase GN=AQ16_418	4	4	4	33.1	33.1	33.1	17.782	0	11.48	71734000	23	4	4	4	1	4	4	4	4	4	4	4	4	4	4	4	4	4	4	4	4	4	4	160	160	1	33	33.1	33.1	33.1	33.1	33.1	33.1	7258100
	1.08662	0.841276	Q4MPM9	1413	Antibiotic biosynthesis monooxygenase family protein GN=AQ16_1413	8	8	8	79.6	79.6	79.6	19.133	0	36.299	252350000	39	8	8	8	1	4	4	4	7	6	4	4	4	4	7	6	4	4	4	4	7	6	4	167	167	1	39	50.3	39.5	50.3	67.1	73.1	39.5	38932000
	0.650746	0.829792	Q4MJL6	3699	Methyltransferase small domain protein GN=AQ16_3699	6	6	6	41.8	41.8	41.8	29.078	0	13.952	81743000	26	6	6	6	1	5	3	3	5	5	3	5	3	3	5	5	3	5	3	3	5	5	3	249	249	1	29	33.7	17.3	23.3	33.7	38.6	17.3	25740000
	1.11972	0.826482	Q4MTQ7	3981	Peptidyl-prolyl cis-trans isomerase GN=ppiB	12	12	12	98.6	98.6	98.6	15.774	0	300.06	8089500000	339	12	12	12	1	11	12	11	11	11	11	11	12	11	11	11	11	11	12	11	11	11	11	145	145	1	354	95.9	98.6	95.9	95.9	95.9	95.9	978160000
	1.03128	0.824385	Q4MT74	848	Flagellar FliS family protein GN=AQ16_848	6	6	6	56.6	56.6	56.6	14.539	0	5.3487	93426000	15	6	6	6	1	6	3	3	4	2	4	6	3	3	4	2	4	6	3	3	4	2	4	122	122	1	32	56.6	34.4	25.4	31.1	13.9	40.2	23062000
	2.02339	0.822135	Q4MS12	3615	Adenine phosphoribosyltransferase GN=apt	20	20	20	77.1	77.1	77.1	18.643	0	112.48	2338200000	247	20	20	20	1	15	15	16	18	17	17	15	15	16	18	17	17	15	15	16	18	17	17	170	170	1	294	77.1	77.1	77.1	77.1	75.9	77.1	332280000
	1.56212	0.821052	A0A0B5YXC3	2384	50S ribosomal protein L14 GN=rplN	11	11	11	59.8	59.8	59.8	13.12	0	323.31	22387000000	425	11	11	11	1	11	11	11	11	11	11	11	11	11	11	11	11	11	11	11	11	11	11	122	122	1	439	59.8	59.8	59.8	59.8	59.8	59.8	4203100000
	2.11473	0.818109	A0A0B5Z2A6	3857	Arginine repressor GN=argR	8	8	8	72.5	72.5	72.5	16.927	0	67.687	324210000	33	8	8	8	1	7	7	5	6	7	8	7	7	5	6	7	8	7	7	5	6	7	8	149	149	1	53	68.5	48.3	35.6	41.6	48.3	72.5	57884000
	2.06189	0.817531	Q4MNF1	3180	Uncharacterized protein GN=AQ16_3180	7	7	7	67.3	67.3	67.3	19.661	0	16.171	83798000	19	7	7	7	1	4	4	5	6	6	4	4	4	5	6	6	4	4	4	5	6	6	4	168	168	1	29	35.1	33.3	39.3	55.4	63.1	33.3	10882000
	1.18227	0.815094	Q4MQI5	rumA	23S rRNA (Uracil-5-)-methyltransferase RumA GN=rumA	18	18	18	52.1	52.1	52.1	51.989	0	64.854	446960000	106	18	18	18	1	14	13	10	14	16	16	14	13	10	14	16	16	14	13	10	14	16	16	459	459	1	112	44.9	40.5	36.4	44.7	48.4	48.4	68746000
	2.8097	0.815093	Q4MGJ0	2688	50S ribosomal protein L31 type B GN=rpmE	13	13	13	90.1	90.1	90.1	9.1842	0	197.06	48819000000	504	13	13	13	1	13	13	13	13	13	13	13	13	13	13	13	13	13	13	13	13	13	13	81	81	1	449	90.1	90.1	90.1	90.1	90.1	90.1	8655900000
	1.29025	0.812458	A0A0B5Z6X9	2528	S4 domain protein GN=AQ16_2528	7	7	7	92.9	92.9	92.9	8.0691	0	21.265	680980000	69	7	7	7	1	7	7	6	7	7	7	7	7	6	7	7	7	7	7	6	7	7	7	70	70	1	91	92.9	92.9	92.9	92.9	92.9	92.9	104160000
	1.56706	0.811416	Q4MJ79	3850	N utilization substance protein B homolog GN=nusB	8	8	8	77.7	77.7	77.7	15.132	0	112.42	2859800000	145	8	8	8	1	8	8	8	8	8	8	8	8	8	8	8	8	8	8	8	8	8	8	130	130	1	144	77.7	77.7	77.7	77.7	77.7	77.7	515730000
	0.629149	0.806936	Q4MJ94	3834	Elongation factor P GN=efp	5	5	5	53.5	53.5	53.5	20.737	0	26.579	1267700000	104	5	5	5	1	5	4	4	4	5	3	5	4	4	4	5	3	5	4	4	4	5	3	185	185	1	153	53.5	40.5	53	40.5	53.5	40	289040000
	1.40934	0.802727	Q4MK69	1032	Uncharacterized protein GN=AQ16_1032	4	4	4	85.9	85.9	85.9	7.2382	0	49.679	420170000	38	4	4	4	1	3	3	3	4	3	3	3	3	3	4	3	3	3	3	3	4	3	3	64	64	1	41	85.9	85.9	85.9	85.9	85.9	85.9	59436000
	1.18833	0.801703	Q4MMQ9	4335	Copper-sensing transcriptional repressor CsoR GN=csoR	5	5	5	48	48	48	11.32	0	5.5423	54769000	9	5	5	5	1	3	3	4	4	3	3	3	3	4	4	3	3	3	3	4	4	3	3	100	100	1	20	36	40	45	48	37	37	8839300
	3.40818	0.801246	Q4MNQ5	gcvPA	Probable glycine dehydrogenase (decarboxylating) subunit 1 GN=gcvPA	15	15	15	42.3	42.3	42.3	49.449	0	68.343	331170000	65	15	15	15	1	9	9	8	10	11	13	9	9	8	10	11	13	9	9	8	10	11	13	447	447	1	86	27.5	28.4	27.5	30.4	33.6	40	49081000
	2.16772	0.800431	A0A0B5YXZ4	2407	50S ribosomal protein L11 GN=rplK	11	11	11	72.3	72.3	72.3	14.975	0	256.42	29242000000	442	11	11	11	1	11	11	11	11	11	11	11	11	11	11	11	11	11	11	11	11	11	11	141	141	1	428	72.3	72.3	72.3	72.3	72.3	72.3	5502700000
	0.685826	0.796041	Q4MQW6	1973	DSBA-like thioredoxin domain protein GN=AQ16_1973	9	9	9	34.6	34.6	34.6	24.731	0	19.389	73378000	34	9	9	9	1	5	6	5	4	5	6	5	6	5	4	5	6	5	6	5	4	5	6	217	217	1	36	27.6	26.7	23.5	18	27.6	27.6	8087800
	5.65379	0.792375	A0A0B5Z6V1	5106	Polysaccharide deacetylase family protein GN=AQ16_5106	12	11	11	53.5	48.7	48.7	30.763	0	32.625	339700000	65	11	11	12	1	8	6	6	11	7	9	7	6	6	10	6	8	7	6	6	10	6	8	275	275	1	74	46.9	28.4	26.2	53.5	44.4	49.5	58325000
	1.35038	0.790134	Q4MQN2	aspA	Aspartate ammonia-lyase GN=aspA	12	8	8	34.6	28.5	28.5	52.528	0	10.563	113730000	35	8	8	12	1	10	11	10	9	10	11	6	7	6	5	6	7	6	7	6	5	6	7	477	477	1	49	27.9	27.9	27.9	23.9	27.9	34.6	16720000
	3.24021	0.788451	A0A0B5Z472	3286	Pseudouridine synthase GN=AQ16_3286	15	15	15	66.9	66.9	66.9	27.504	0	94.239	606640000	76	15	15	15	1	13	12	12	14	14	13	13	12	12	14	14	13	13	12	12	14	14	13	242	242	1	103	58.3	55	50.4	66.5	58.7	58.7	82462000
	3.31692	0.781862	Q4MIM6	3882	2-oxoisovalerate dehydrogenase subunit alpha GN=bfmBAA	25	25	25	79.6	79.6	79.6	36.767	0	232.72	1923300000	225	25	25	25	1	23	18	18	21	23	21	23	18	18	21	23	21	23	18	18	21	23	21	333	333	1	258	79.6	74.5	76.9	78.4	79.3	77.8	272970000
	0.903767	0.780666	Q4MJL7	3698	Ribosomal silencing factor RsfS GN=rsfS	13	13	13	95.8	95.8	95.8	13.544	0	93.584	2484800000	163	13	13	13	1	10	8	11	12	12	10	10	8	11	12	12	10	10	8	11	12	12	10	118	118	1	148	95.8	90.7	95.8	95.8	95.8	95.8	350450000
	2.40781	0.777871	Q4MLE7	53	Uncharacterized protein GN=AQ16_53	4	4	4	46	46	46	14.822	0	11.522	88213000	16	4	4	4	1	2	3	3	3	2	2	2	3	3	3	2	2	2	3	3	3	2	2	124	124	1	21	19.4	34.7	30.6	30.6	23.4	23.4	12658000
	1.30624	0.771047	Q4MM22	2822	HxlR-like helix-turn-helix family protein GN=AQ16_2822	9	9	9	76	76	76	12.134	0	16.26	211990000	38	9	9	9	1	8	5	8	7	8	7	8	5	8	7	8	7	8	5	8	7	8	7	104	104	1	47	74	54.8	76	59.6	68.3	68.3	31240000
	2.74364	0.770515	Q4ML28	1815	3D domain protein GN=AQ16_1815	12	12	12	39.5	39.5	39.5	46.284	0	111.49	544110000	86	12	12	12	1	9	11	10	10	12	11	9	11	10	10	12	11	9	11	10	10	12	11	418	418	1	104	32.3	34.9	34.4	36.8	39.5	39.5	87101000
	0.501787	0.763563	A0A0B5YYE0	5373	Glycerophosphoryl diester phosphodiesterase family protein GN=AQ16_5373	2	2	2	8.7	8.7	8.7	31.564	0.013808	1.5863	256990000	5	2	2	2	1	1	1	1	2	2	2	1	1	1	2	2	2	1	1	1	2	2	2	276	276	1	15	4.3	4.3	4.3	8.7	8.7	8.7	27830000
	1.13446	0.75465	Q4MHW6	cspD	Cold shock protein CspD GN=cspD	5	5	4	92.4	92.4	80.3	7.366	0	323.31	29936000000	1264	4	5	5	1	5	5	5	5	5	5	5	5	5	5	5	5	4	4	4	4	4	4	66	66	1	1419	92.4	92.4	92.4	92.4	92.4	92.4	4819400000
	1.63333	0.750093	Q4MNZ6	3720	Uncharacterized protein GN=AQ16_3720	11	11	11	64.6	64.6	64.6	16.454	0	65.338	1034300000	70	11	11	11	1	10	10	10	10	10	10	10	10	10	10	10	10	10	10	10	10	10	10	147	147	1	88	64.6	64.6	64.6	64.6	64.6	64.6	206790000
	0.968927	0.749975	Q4MW23;Q4MM05	1462	UPF0145 protein AQ16_1462 GN=AQ16_1462	8	8	4	81.6	81.6	35.9	11.035	0	50.931	139410000	27	NaN	NaN	NaN	2	7	6	7	6	8	7	7	6	7	6	8	7	4	3	4	3	4	4	NaN	103	1	99	81.6	81.6	81.6	74.8	81.6	81.6	26200000
	1.50533	0.749354	Q4MJA1	mntR	Transcriptional regulator MntR GN=mntR	11	11	11	78.2	78.2	78.2	16.524	0	56.883	311240000	56	11	11	11	1	8	6	7	11	9	8	8	6	7	11	9	8	8	6	7	11	9	8	142	142	1	71	64.8	52.8	64.8	78.2	75.4	64.8	50769000
	3.37467	0.749228	A0A0B5Z6C4	2271	HAD hydrolase, IIB family protein GN=AQ16_2271	14	14	14	62.8	62.8	62.8	32.311	0	63.623	358830000	54	14	14	14	1	11	8	8	10	11	11	11	8	8	10	11	11	11	8	8	10	11	11	290	290	1	80	62.1	44.5	46.9	55.5	58.3	50.3	63744000
	0.910008	0.747578	Q4MVB6	3192	S-ribosylhomocysteine lyase GN=luxS	14	14	14	93.6	93.6	93.6	17.855	0	179.69	950370000	100	14	14	14	1	11	9	13	12	11	12	11	9	13	12	11	12	11	9	13	12	11	12	157	157	1	110	80.9	56.7	93.6	91.1	80.3	93	120840000
	0.812676	0.746959	Q4MLM3	5017	PhnA family protein GN=AQ16_5017	6	5	5	51.3	44.2	44.2	12.602	0	8.5074	117140000	16	5	5	6	1	5	5	4	6	4	4	4	4	3	5	3	3	4	4	3	5	3	3	113	113	1	25	46	46	38.1	51.3	38.1	38.1	19971000
	2.00622	0.746166	A0A0B5ZH76	2408	Transcription termination/antitermination protein NusG GN=nusG	17	17	17	87.6	87.6	87.6	20.258	0	288.58	4698600000	224	17	17	17	1	16	12	13	15	16	14	16	12	13	15	16	14	16	12	13	15	16	14	177	177	1	244	87.6	75.1	75.1	87.6	87.6	75.1	999920000
	3.27976	0.745194	Q4MS60	3568	Septum formation protein Maf GN=maf	4	4	4	20.4	20.4	20.4	21.065	0	4.811	80461000	14	4	4	4	1	3	3	3	4	3	4	3	3	3	4	3	4	3	3	3	4	3	4	191	191	1	21	15.7	15.7	15.7	20.4	15.7	20.4	11092000
	0.705481	0.743988	Q4MTX8	282	UPF0346 protein AQ16_282 GN=AQ16_282	1	1	1	32.4	32.4	32.4	8.4334	0	7.7272	42250000	15	1	1	1	1	1	1	1	1	1	1	1	1	1	1	1	1	1	1	1	1	1	1	71	71	1	12	32.4	32.4	32.4	32.4	32.4	32.4	6076500
	1.9164	0.743369	Q4MJW8	4366	HTH-type transcriptional regulator glnR GN=glnR	5	5	5	51.9	51.9	51.9	15.203	0	12.94	66933000	10	5	5	5	1	4	3	3	3	4	3	4	3	3	3	4	3	4	3	3	3	4	3	129	129	1	23	40.3	32.6	35.7	32.6	44.2	32.6	14771000
	1.15353	0.739418	A0A0B5ZB40	3636	UPF0297 protein AQ16_3636 GN=AQ16_3636	5	5	5	69.3	69.3	69.3	10.33	0	49.417	882720000	77	5	5	5	1	5	5	5	5	5	5	5	5	5	5	5	5	5	5	5	5	5	5	88	88	1	68	69.3	69.3	69.3	69.3	69.3	69.3	148910000
	1.83052	0.738607	Q4MNQ4	gcvPB	Probable glycine dehydrogenase (decarboxylating) subunit 2 GN=gcvPB	17	17	17	48.3	48.3	48.3	54.865	0	60.234	276420000	56	17	17	17	1	9	9	9	14	12	13	9	9	9	14	12	13	9	9	9	14	12	13	491	491	1	85	28.7	31	28.5	38.7	39.7	41.1	30169000
	1.15087	0.730894	Q4MK53	1019	Pseudouridine synthase GN=rluB	11	11	11	49.6	49.6	49.6	27.556	0	89.544	812540000	79	11	11	11	1	10	9	9	9	10	11	10	9	9	9	10	11	10	9	9	9	10	11	242	242	1	97	46.3	43	43	40.9	46.3	49.6	124030000
	2.5775	0.729463	A0A0B5Z9B6	2887	Ribonuclease R GN=rnr	18	18	18	31.4	31.4	31.4	91.946	0	47.437	220610000	50	18	18	18	1	10	12	10	9	13	13	10	12	10	9	13	13	10	12	10	9	13	13	808	808	1	86	18.1	23.1	18.3	17.7	24.4	25	21709000
	1.32636	0.727581	Q4MKC1	rimP	Ribosome maturation factor RimP GN=rimP	10	10	10	77.6	77.6	77.6	17.696	0	91.276	794490000	80	10	10	10	1	9	10	8	9	8	8	9	10	8	9	8	8	9	10	8	9	8	8	156	156	1	95	59	77.6	59	59	59	41.7	122650000
	0.607151	0.719298	A0A0B5ZHL0	2398	30S ribosomal protein S7 GN=rpsG	12	12	12	68.6	68.6	68.6	17.884	0	323.31	13877000000	405	12	12	12	1	11	11	12	11	10	11	11	11	12	11	10	11	11	11	12	11	10	11	156	156	1	441	67.9	63.5	68.6	63.5	62.8	63.5	2203800000
	1.36174	0.718658	A0A0B5Z8F2	3492	ABC transporter family protein GN=AQ16_3492	10	10	10	45.9	45.9	45.9	32.793	0	39.652	171170000	45	10	10	10	1	5	7	8	9	9	9	5	7	8	9	9	9	5	7	8	9	9	9	294	294	1	72	27.6	37.4	42.2	42.9	42.9	45.9	14237000
	1.04458	0.715471	Q4MVI8	3263	Rhodanese-like domain protein GN=AQ16_3263	9	9	9	88.1	88.1	88.1	11.607	0	91.041	766820000	78	9	9	9	1	5	6	7	7	6	5	5	6	7	7	6	5	5	6	7	7	6	5	101	101	1	87	65.3	77.2	78.2	87.1	77.2	56.4	121600000
	0.864886	0.712466	Q4MVY0	3401	Bacterial regulatory s, gntR family protein GN=AQ16_3401	12	12	12	59.3	59.3	59.3	24.851	0	35.29	226100000	46	12	12	12	1	7	7	5	10	7	7	7	7	5	10	7	7	7	7	5	10	7	7	214	214	1	65	45.8	43.9	33.6	45.3	46.7	39.7	36113000
	0.668486	0.707619	Q4MNZ0	ybeY	Endoribonuclease YbeY GN=ybeY	7	7	7	64.1	64.1	64.1	18.048	0	34.649	208820000	28	7	7	7	1	4	5	6	6	4	6	4	5	6	6	4	6	4	5	6	6	4	6	156	156	1	51	40.4	48.1	53.8	48.1	39.1	48.1	29340000
	0.589525	0.705271	Q4MPP6	1428	HTH-type transcriptional regulator Hpr GN=hpr	4	4	4	31.4	31.4	31.4	21.733	0	15.098	87973000	17	4	4	4	1	1	3	2	4	3	3	1	3	2	4	3	3	1	3	2	4	3	3	185	185	1	22	8.1	22.7	15.1	31.4	22.7	22.7	3937600
	1.63176	0.703408	Q4MGD6	2376	50S ribosomal protein L30 GN=rpmD	12	12	12	98.3	98.3	98.3	6.5557	0	239.69	43740000000	404	12	12	12	1	12	12	11	10	12	12	12	12	11	10	12	12	12	12	11	10	12	12	60	60	1	541	98.3	98.3	95	91.7	98.3	98.3	8070800000
	1.15253	0.699592	A0A0B5YR89	3889	Uncharacterized protein GN=AQ16_3889	13	13	13	94.4	94.4	94.4	16.085	0	61.371	1042800000	113	13	13	13	1	12	12	12	13	11	12	12	12	12	13	11	12	12	12	12	13	11	12	144	144	1	151	84.7	84.7	84.7	94.4	84.7	84.7	184580000
	1.01739	0.692646	Q4MVE4	3221	Iron-sulfur cluster biosynthesis family protein GN=AQ16_3221	7	7	7	65.4	65.4	65.4	12.218	0	22.969	136140000	21	7	7	7	1	6	4	5	6	4	6	6	4	5	6	4	6	6	4	5	6	4	6	107	107	1	34	58.9	47.7	44.9	65.4	30.8	58.9	19799000
	1.48683	0.690935	Q4MTE0	4098	Uncharacterized protein GN=AQ16_4098	3	3	3	51.5	51.5	51.5	8.0613	0.0053888	2.2476	90628000	10	3	3	3	1	2	2	3	3	2	2	2	2	3	3	2	2	2	2	3	3	2	2	66	66	1	22	34.8	34.8	51.5	51.5	34.8	34.8	15115000
[truncated: 917 more rows]
[truncated: 18 more columns]
